# Supplementary material for: Experimental duration determines the effect of arbuscular mycorrhizal fungi on plant biomass in pot experiments: A meta-analysis
Source: Front Plant Sci. 2022 Nov 3;13:1024874. doi: 10.3389/fpls.2022.1024874 (PMC9671359; doi:10.3389/fpls.2022.1024874)
Supplement: Supplementary file 1 [file DataSheet_1.xlsx]

## Sheet: Sheet1
Paper_No	Obs_No	Tittle	Published year	Weight_group	Sand	AP_group	pH_group	Plant speceis	Main_family	Root_system	Life_style	Duration	Replication	RLC	Number AMF	AMF species	AMF_family	AMF_type	Plant R/S	Aboveground	Aboveground_Var	Belowground	Belowground_Var	Total	Total_Var
1	1	A comparison of development and mineral nutrition of micropropagated Fragaria × ananassa cv. Elvira (strawberry) when colonised by nine species of arbuscular mycorrhizal fungi	2001	<1	Sandy		Acidic	Fragaria ananassa	Other	Fibrous	Perennial	105	10	37.6971	1	Rhizophagus clarus	Glomeraceae	Rhizophilic guild	1.33459	-0.49186	0.00539568	-0.790676	0.0173243	-0.651632	0.0109185
1	2	A comparison of development and mineral nutrition of micropropagated Fragaria × ananassa cv. Elvira (strawberry) when colonised by nine species of arbuscular mycorrhizal fungi	2001	1_2.9	Sandy		Acidic	Fragaria ananassa	Other	Fibrous	Perennial	105	10	26.8143	1	Claroideoglomus etunicatum	Claroideoglomeraceae	Rhizophilic guild	1.33459	-0.0821275	0.011052	-0.289956	0.0386618	-0.195603	0.0236213
1	3	A comparison of development and mineral nutrition of micropropagated Fragaria × ananassa cv. Elvira (strawberry) when colonised by nine species of arbuscular mycorrhizal fungi	2001	>2.9	Sandy		Acidic	Fragaria ananassa	Other	Fibrous	Perennial	105	10	30.2741	1	Rhizophagus intraradices	Glomeraceae	Rhizophilic guild	1.33459	0.134597	0.00432832	0.59449	0.024362	0.422625	0.0152808
1	4	A comparison of development and mineral nutrition of micropropagated Fragaria × ananassa cv. Elvira (strawberry) when colonised by nine species of arbuscular mycorrhizal fungi	2001	>2.9	Sandy		Acidic	Fragaria ananassa	Other	Fibrous	Perennial	105	10	18.4221	1	Gigaspora gigantea	Gigasporaceae	Edaphophilic guild	1.33459	-1.0997	0.00918293	-0.739045	0.0811632	-0.877956	0.0474778
1	5	A comparison of development and mineral nutrition of micropropagated Fragaria × ananassa cv. Elvira (strawberry) when colonised by nine species of arbuscular mycorrhizal fungi	2001	>2.9	Sandy		Acidic	Fragaria ananassa	Other	Fibrous	Perennial	105	10	6.69377	1	Gigaspora margarita	Gigasporaceae	Edaphophilic guild	1.33459	-0.16759	0.00520421	0.0879842	0.050153	-0.0136093	0.0273174
1	6	A comparison of development and mineral nutrition of micropropagated Fragaria × ananassa cv. Elvira (strawberry) when colonised by nine species of arbuscular mycorrhizal fungi	2001	>2.9	Sandy		Acidic	Fragaria ananassa	Other	Fibrous	Perennial	105	10	6.98369	1	Gigaspora rosea	Gigasporaceae	Edaphophilic guild	1.33459	0.0635311	0.00657002	0.618832	0.0616705	0.417307	0.0379581
1	7	A comparison of development and mineral nutrition of micropropagated Fragaria × ananassa cv. Elvira (strawberry) when colonised by nine species of arbuscular mycorrhizal fungi	2001	>2.9	Sandy		Acidic	Fragaria ananassa	Other	Fibrous	Perennial	105	10	16.1918	1	Scutellospora calospora	Gigasporaceae	Edaphophilic guild	1.33459	-0.379051	0.0141473	-0.0709883	0.026883	-0.191538	0.0213643
1	8	A comparison of development and mineral nutrition of micropropagated Fragaria × ananassa cv. Elvira (strawberry) when colonised by nine species of arbuscular mycorrhizal fungi	2001	>2.9	Sandy		Acidic	Fragaria ananassa	Other	Fibrous	Perennial	105	10	8.40863	1	Gigaspora heterogama	Gigasporaceae	Edaphophilic guild	1.33459	-0.234256	0.012302	-0.141591	0.0961094	-0.180237	0.0520841
2	9	A non-toxic polymer enhances sorghum - mycorrhiza symbiosis for bioremediation of Cd	2019	>2.9	No_sandy	P_deficent	Neutral	Sorghum bicolor	Poaceae	Fibrous	Annual	90	3	60.7	1	Claroideoglomus etunicatum	Claroideoglomeraceae	Rhizophilic guild	0.153272	0.184925	0.000728604	0.584275	0.000592652	0.248121	0.000707292
3	10	Aboveground resource allocation in response to root herbivory as affected by the arbuscular mycorrhizal symbiosis	2019	>2.9	Sandy	P_deficent		Saccharum spp.	Poaceae	Fibrous	Perennial	133	8	28	>1	Mixed	Mixed	Mixed	0.435878	0.0820744	0.0074637	0.586339	0.0246769	0.263617	0.009904
4	11	Acclimatization of Tapeinochilos ananassae plantlets in association with arbuscular mycorrhizal fungi	2011	1_2.9	Sandy		Acidic	Tapeinochilos ananassae	Other	Fibrous	Perennial	90	10	93.74	1	Claroideoglomus etunicatum	Claroideoglomeraceae	Rhizophilic guild	1.28866	1.11565	0.002	1.08248	0.002	1.09711	0.002
4	12	Acclimatization of Tapeinochilos ananassae plantlets in association with arbuscular mycorrhizal fungi	2011	1_2.9	Sandy		Acidic	Tapeinochilos ananassae	Other	Fibrous	Perennial	90	10	81.45	1	Acaulospora longula	Acaulosporaceae	Ancestral guild	1.28866	0.402023	0.002	0.429182	0.002	0.417406	0.002
4	13	Acclimatization of Tapeinochilos ananassae plantlets in association with arbuscular mycorrhizal fungi	2011	1_2.9	Sandy		Acidic	Tapeinochilos ananassae	Other	Fibrous	Perennial	90	10	99.12	1	Gigaspora albida	Gigasporaceae	Edaphophilic guild	1.28866	-0.180262	0.002	-0.409473	0.002	-0.302811	0.002
5	14	Accumulation and Speciation of Selenium in Plants as Affected by Arbuscular Mycorrhizal Fungus Glomus mosseae	2011		Sandy	P_deficent	Alkaline	Glycine max	Fabaceae	Taproot	Annual	56	3		1	Funneliformis mosseae	Glomeraceae	Rhizophilic guild	0.207792	0.0988458	0.00151063	0	0.00238895	0.082521	0.00163141
5	15	Accumulation and Speciation of Selenium in Plants as Affected by Arbuscular Mycorrhizal Fungus Glomus mosseae	2011		Sandy	P_deficent	Alkaline	Medicago sativa	Fabaceae	Taproot	Perennial	56	3		1	Funneliformis mosseae	Glomeraceae	Rhizophilic guild	0.659292	0.0432968	0.00354482	0.258744	0.0231332	0.134531	0.00906703
5	16	Accumulation and Speciation of Selenium in Plants as Affected by Arbuscular Mycorrhizal Fungus Glomus mosseae	2011		Sandy	P_deficent	Alkaline	Zea mays	Poaceae	Fibrous	Annual	56	3		1	Funneliformis mosseae	Glomeraceae	Rhizophilic guild	0.492179	0.0408637	0.0160183	0.0271699	0.0230044	0.0363676	0.0177454
6	17	Acquisition of Cu, Zn, Mn and Fe by mycorrhizal maize ( Zea mays L.) grown in soil at different P and micronutrient levels	2000	>2.9	Sandy		Neutral	Zea mays	Poaceae	Fibrous	Annual	56	4		1	Rhizophagus intraradices	Glomeraceae	Rhizophilic guild	0.341004	0.133008	0.005	0.0194417	0.005	0.105329	0.005
7	18	Acquisition of N by external hyphae of an arbuscular mycorrhizal fungus and its impact on physiological responses in maize under drought-stressed and well-watered conditions	1999	>2.9	Sandy			Zea mays	Poaceae	Fibrous	Annual	70	4	60	1	Rhizophagus intraradices	Glomeraceae	Rhizophilic guild	0.354373	0.0997842	0.005	0.222577	0.005	0.133398	0.005
8	19	Age versus stage: does ontogeny modify the effect of phosphorus and arbuscular mycorrhizas on above- and below-ground defence in forage sorghum?	2014	1_2.9	Sandy	No_P_deficient		Sorghum bicolor	Poaceae	Fibrous	Annual	64	6	51.2	>1	Mixed	Mixed	Mixed	2.02	0.0798963	0.00333333	-0.00262475	0.00333333	0.0254611	0.00333333
9	20	Alleviating salt stress in tomato inoculated with mycorrhizae: photosynthetic performance and enzymatic antioxidants	2017	>2.9	Sandy			Solanum lycopersicum	Solanaceae	Fibrous	Annual	90	3	44	1	Rhizophagus fasciculatus	Glomeraceae	Rhizophilic guild	0.29	0.127833	0.00666667	0.226273	0.00666667	0.150823	0.00666667
10	21	Alleviation of drought stress of Chile ancho pepper (Capsicum annuum L. vc .San Luis) with arbuscular mycorrhiza indigunous to Mexico	2002		Sandy			Capsicum annuum	Solanaceae	Fibrous	Annual	53	13		1	Rhizophagus fasciculatus	Glomeraceae	Rhizophilic guild	0.33	0	0.000661157	0.200671	0.00515253	0.053346	0.00142526
10	22	Alleviation of drought stress of Chile ancho pepper (Capsicum annuum L. vc .San Luis) with arbuscular mycorrhiza indigunous to Mexico	2002		Sandy			Capsicum annuum	Solanaceae	Fibrous	Annual	53	13		>1	Mixed	Mixed	Mixed	0.33	-0.0560895	0.00180987	0.154151	0.00535399	2.22e-16	0.00243948
11	23	Alleviation of salt stress and changes in glycyrrhizin accumulation by arbuscular mycorrhiza in liquorice (Glycyrrhiza glabra) grown under salinity stress	2019	1_2.9	Sandy	P_deficent	Alkaline	Glycyrrhiza glabra	Fabaceae	Taproot	Perennial	150	4	75.6	1	Funneliformis mosseae	Glomeraceae	Rhizophilic guild	0.962766	1.00772	0.00980424	0.829781	0.006964	0.924388	0.0083021
12	24	Alleviation of salt stress by arboscular-mycorrhizal Glomus species in Lactuca sativa plants	1996	<1	Sandy	P_deficent	Alkaline	Lactuca sativa	Asteraceae	Taproot	Annual	77	5	70	1	Funneliformis mosseae	Glomeraceae	Rhizophilic guild	0.206186	0.623786	0.004	0.854415	0.004	0.667172	0.004
12	25	Alleviation of salt stress by arboscular-mycorrhizal Glomus species in Lactuca sativa plants	1996	<1	Sandy	P_deficent	Alkaline	Lactuca sativa	Asteraceae	Taproot	Annual	77	5	69	1	Rhizophagus fasciculatus	Glomeraceae	Rhizophilic guild	0.206186	0.44917	0.004	0.438255	0.004	0.447312	0.004
12	26	Alleviation of salt stress by arboscular-mycorrhizal Glomus species in Lactuca sativa plants	1996	<1	Sandy	P_deficent	Alkaline	Lactuca sativa	Asteraceae	Taproot	Annual	77	5	87	1	Glomus deserticola	Glomeraceae	Rhizophilic guild	0.206186	0.462242	0.004	0.693147	0.004	0.505684	0.004
13	27	An arbuscular mycorrhizal fungus ameliorates plant growth and hormones after moderate root damage due to simulated coal mining subsidence: a microcosm study	2019	>2.9	Sandy			Zea mays	Poaceae	Fibrous	Annual	73	3	91.1	1	Funneliformis mosseae	Glomeraceae	Rhizophilic guild	0.431298	0.425617	0.00310672	0.235457	0.000508867	0.372023	0.00160764
14	28	Apple Rootstock Response to Vesicular-arbuscular Mycorrhizal Fungi in a High Phosphorus Soil	1994		Sandy		Neutral	Malus domestica	Other	Taproot	Perennial	84	20	96.1303	1	Diversispora versiformis	Diversisporaceae	Edaphophilic guild	0.463482	0.473019	0.001	0.618197	0.001	0.521317	0.001
14	29	Apple Rootstock Response to Vesicular-arbuscular Mycorrhizal Fungi in a High Phosphorus Soil	1995		Sandy		Neutral	Malus domestica	Other	Taproot	Perennial	84	20	94.9374	1	Glomus aggregatum	Glomeraceae	Rhizophilic guild	0.463482	0.389034	0.001	0.565417	0.001	0.448331	0.001
14	30	Apple Rootstock Response to Vesicular-arbuscular Mycorrhizal Fungi in a High Phosphorus Soil	1996		Sandy		Neutral	Malus domestica	Other	Taproot	Perennial	84	20	87.8673	1	Rhizophagus intraradices	Glomeraceae	Rhizophilic guild	0.463482	0.488135	0.001	0.674282	0.001	0.550919	0.001
14	31	Apple Rootstock Response to Vesicular-arbuscular Mycorrhizal Fungi in a High Phosphorus Soil	1997		Sandy		Neutral	Malus domestica	Other	Taproot	Perennial	84	20	87.9546	1	Diversispora versiformis	Diversisporaceae	Edaphophilic guild	0.463482	0.525432	0.001	0.353259	0.001	0.474043	0.001
15	32	Arbuscular mycorrhiza affects nickel translocation and expression of ABC transporter and metallothionein genes in Festuca arundinacea	2015		No_sandy	P_deficent	Alkaline	Festuca arundinacea	Poaceae	Fibrous	Perennial	90	3	57	1	Funneliformis mosseae	Glomeraceae	Rhizophilic guild	1.89277	0.158865	0.00248932	0.127615	0.000318527	0.138529	0.000830736
16	33	Arbuscular Mycorrhiza Augments Arsenic Tolerance in Wheat (Triticum aestivum L.) by Strengthening Antioxidant Defense System and Thiol Metabolism	2017	>2.9	No_sandy	No_P_deficient	Alkaline	Triticum aestivum	Poaceae	Fibrous	Annual	45	5	58	1	Rhizophagus intraradices	Glomeraceae	Rhizophilic guild	0.5	1.53328	0.000586368	0.236389	0.000288581	1.25593	0.00044847
16	34	Arbuscular Mycorrhiza Augments Arsenic Tolerance in Wheat (Triticum aestivum L.) by Strengthening Antioxidant Defense System and Thiol Metabolism	2017	>2.9	No_sandy	No_P_deficient	Alkaline	Triticum aestivum	Poaceae	Fibrous	Annual	45	5	70	1	Claroideoglomus etunicatum	Claroideoglomeraceae	Rhizophilic guild	0.5	2.0836	0.000548749	0.236389	0.000620991	1.75402	0.000411982
17	35	Arbuscular mycorrhiza augments cadmium tolerance in soybean by altering accumulation and partitioning of nutrient elements, and related gene expression	2019	1_2.9	Sandy	P_deficent	Acidic	Panicum miliaceum	Poaceae	Fibrous	Annual	50	4	82.911	1	Rhizophagus irregularis	Glomeraceae	Rhizophilic guild	0.365852	0.29466	0.0214714	0.48255	0.00771346	0.348548	0.0165889
17	36	Arbuscular mycorrhiza augments cadmium tolerance in soybean by altering accumulation and partitioning of nutrient elements, and related gene expression	2019	1_2.9	Sandy	P_deficent	Acidic	Panicum miliaceum	Poaceae	Fibrous	Annual	50	4	80.476	1	Rhizophagus irregularis	Glomeraceae	Rhizophilic guild	0.36763	0.610717	0.0223084	0.434162	0.0064515	0.566237	0.0158633
18	37	Arbuscular mycorrhiza decreases cadmium phytoextraction by transgenic tobacco with inserted metallothionein	2005	>2.9	No_sandy		Alkaline	Nicotiana tabacum	Solanaceae	Fibrous	Annual	42	5	89	1	Rhizophagus intraradices	Glomeraceae	Rhizophilic guild	0.141538	0.41058	0.0153461	0.61401	0.0192278	0.438168	0.0157093
18	38	Arbuscular mycorrhiza decreases cadmium phytoextraction by transgenic tobacco with inserted metallothionein	2005	>2.9	No_sandy		Alkaline	Nicotiana tabacum	Solanaceae	Fibrous	Annual	42	5	82	1	Rhizophagus intraradices	Glomeraceae	Rhizophilic guild	0.141538	0.0451204	0.0291149	0.187742	0.032921	0.0639487	0.0294997
18	39	Arbuscular mycorrhiza decreases cadmium phytoextraction by transgenic tobacco with inserted metallothionein	2005	>2.9	No_sandy		Alkaline	Nicotiana tabacum	Solanaceae	Fibrous	Annual	42	5	88	1	Rhizophagus intraradices	Glomeraceae	Rhizophilic guild	0.15	0.217065	0.00742007	0.149812	0.0117001	0.208545	0.00789269
18	40	Arbuscular mycorrhiza decreases cadmium phytoextraction by transgenic tobacco with inserted metallothionein	2005	>2.9	No_sandy		Alkaline	Nicotiana tabacum	Solanaceae	Fibrous	Annual	42	5	75	1	Rhizophagus intraradices	Glomeraceae	Rhizophilic guild	0.15	-0.0625204	0.0280807	-0.164303	0.0116211	-0.0752234	0.0256608
19	41	Arbuscular mycorrhiza enhanced arsenic resistance of both white clover (Trifolium repens Linn.) and ryegrass (Lolium perenne L.) plants in an arsenic-contaminated soil	2007	<1	No_sandy	P_deficent	Alkaline	Lolium perenne	Poaceae	Fibrous	Perennial	84	4	49	1	Funneliformis mosseae	Glomeraceae	Rhizophilic guild	0.511695	2.39751	0.235786	2.53323	0.333149	2.44555	0.253515
19	42	Arbuscular mycorrhiza enhanced arsenic resistance of both white clover (Trifolium repens Linn.) and ryegrass (Lolium perenne L.) plants in an arsenic-contaminated soil	2007	<1	No_sandy	P_deficent	Alkaline	Trifolium repens	Fabaceae	Fibrous	Perennial	84	4	68	1	Funneliformis mosseae	Glomeraceae	Rhizophilic guild	0.531422	2.85263	0.291232	2.18979	0.378181	2.6685	0.322021
20	43	Arbuscular Mycorrhiza Enhances Biomass Production and Salt Tolerance of Sweet Sorghum	2019	1_2.9	No_sandy		Alkaline	Sorghum bicolor	Poaceae	Fibrous	Annual	60	4	46	1	Acaulospora mellea	Acaulosporaceae	Ancestral guild	0.160039	0.851957	0.0010998	0.980118	0.00287764	0.870645	0.00130713
20	44	Arbuscular Mycorrhiza Enhances Biomass Production and Salt Tolerance of Sweet Sorghum	2019	1_2.9	No_sandy		Alkaline	Sorghum bicolor	Poaceae	Fibrous	Annual	60	4	49	1	Acaulospora mellea	Acaulosporaceae	Ancestral guild	0.350594	1.27497	0.00129975	1.3535	0.0114263	1.29596	0.00296173
21	45	Arbuscular mycorrhiza enhances drought tolerance of tomato plants by regulating the 14-3-3 genes in the ABA signaling pathway	2018	1_2.9	Sandy	P_deficent	Alkaline	Solanum lycopersicum	Solanaceae	Fibrous	Annual	98	5	58	1	Rhizophagus intraradices	Glomeraceae	Rhizophilic guild	0.255054	0.202755	0.0108427	-0.527914	0.00824193	0.0914297	0.0103042
22	46	Arbuscular mycorrhiza enhances nutrient accumulation in wheat exposed to elevated CO2 and soil salinity	2018	>2.9	Sandy	No_P_deficient	Neutral	Triticum aestivum	Poaceae	Fibrous	Annual	70	4	41.3	1	Rhizophagus irregularis	Glomeraceae	Rhizophilic guild	0.297391	0.230421	0.0131937	0.438066	0.0482266	0.281969	0.0200328
23	47	Arbuscular mycorrhiza infection enhances the growth response of Lolium perenne to elevated atmospheric pCO(2)	2002		Sandy			Lolium perenne	Poaceae	Fibrous	Perennial	60	4	17.63	1	Rhizophagus intraradices	Glomeraceae	Rhizophilic guild	0.82	0.0708082	0.005	0.10674	0.005	0.0871573	0.005
24	48	Arbuscular mycorrhiza mediated e?ects on growth, mineral nutrition and biological nitrogen ?xation of Melilotus alba Med. in a subtropical grassland soil	2018		No_sandy	P_deficent	Acidic	Melilotus alba	Fabaceae	Taproot	Annual	84	5	73.3	1	Rhizophagus intraradices	Glomeraceae	Rhizophilic guild	0.657148	0.00275667	0.004	-0.205668	0.004	-0.07478	0.004
25	49	Arbuscular mycorrhiza mediates glomalin-related soil protein production and soil enzyme activities in the rhizosphere of trifoliate orange grown under different P levels	2014	>2.9	Sandy			Poncirus trifoliata	Rutaceae	Taproot	Perennial	120	4	54.7	1	Funneliformis mosseae	Glomeraceae	Rhizophilic guild	0.354839	0.238085	0.00168695	0.167054	0.00354812	0.219964	0.000729172
26	50	Arbuscular Mycorrhiza Rhizophagus irregularis and?Silicon Modulate Growth, Proline Biosynthesis and?Yield in?Cajanus cajan L. Millsp. (pigeonpea) Genotypes Under Cadmium and?Zinc Stress	2017	>2.9	Sandy	No_P_deficient	Alkaline	Cajanus cajan	Fabaceae	Taproot	Perennial	80	6	80	1	Rhizophagus irregularis	Glomeraceae	Rhizophilic guild	0.275065	0.111375	0.00125989	0.142761	0.0043356	0.11823	0.0017744
26	51	Arbuscular Mycorrhiza Rhizophagus irregularis and?Silicon Modulate Growth, Proline Biosynthesis and?Yield in?Cajanus cajan L. Millsp. (pigeonpea) Genotypes Under Cadmium and?Zinc Stress	2017	>2.9	Sandy	No_P_deficient	Alkaline	Cajanus cajan	Fabaceae	Taproot	Perennial	80	6	86	1	Rhizophagus irregularis	Glomeraceae	Rhizophilic guild	0.301379	0.145522	0.00145718	0.171725	0.00248204	0.151652	0.00167275
27	52	Arbuscular mycorrhiza, but not hydrogel, alleviates drought stress of ornamental plants in peat-based substrate	2020	<1	Sandy	No_P_deficient	Acidic	Gazania rigens	Asteraceae	Taproot	Perennial	133	10	42	>1	Mixed	Mixed	Mixed	0.0814386	0.189208	0.044386	0.133531	0.0308205	0.185121	0.0432895
27	53	Arbuscular mycorrhiza, but not hydrogel, alleviates drought stress of ornamental plants in peat-based substrate	2020	<1	Sandy	No_P_deficient	Acidic	Pelargonium peltatum	Other	Taproot	Perennial	133	10	74	>1	Mixed	Mixed	Mixed	0.540324	0.296144	0.00381426	0.371197	0.00555896	0.323117	0.00435332
27	54	Arbuscular mycorrhiza, but not hydrogel, alleviates drought stress of ornamental plants in peat-based substrate	2020	<1	Sandy	No_P_deficient	Acidic	Pelargonium zonale	Other	Taproot	Perennial	133	10	51	>1	Mixed	Mixed	Mixed	0.171655	0.157805	0.0112048	-0.122103	0.0729041	0.121381	0.0160811
28	55	Arbuscular mycorrhizae alleviate negative effects of zinc oxide nanoparticle and zinc accumulation in maize plants e A soil microcosm experiment	2016	1_2.9	No_sandy	No_P_deficient	Alkaline	Zea mays	Poaceae	Fibrous	Annual	56	3	62	1	Diversispora versiformis	Diversisporaceae	Edaphophilic guild	0.190741	0.569095	0.000340159	0.483265	0.00410061	0.555832	0.000562671
28	56	Arbuscular mycorrhizae alleviate negative effects of zinc oxide nanoparticle and zinc accumulation in maize plants e A soil microcosm experiment	2016	1_2.9	No_sandy	No_P_deficient	Alkaline	Zea mays	Poaceae	Fibrous	Annual	56	3	66	1	Funneliformis caledonium	Glomeraceae	Rhizophilic guild	0.190741	0.399273	0.00023982	0.653538	0.00434597	0.444606	0.000515035
29	57	Arbuscular Mycorrhizae Effects on Growth of Two Hawaiian Species: Indigenous Osteomeles anthyllidifolia (Rosaceae) and Invasive Psidium cattleianum (Myrtaceae)	2006	<1	Sandy		Acidic	Osteomeles anthyllidifolia	Other	Taproot	Perennial	115	5	56	>1	Mixed	Mixed	Mixed	1.3701	1.07772	0.0435963	0.445201	0.0446658	0.761679	0.0421908
29	58	Arbuscular Mycorrhizae Effects on Growth of Two Hawaiian Species: Indigenous Osteomeles anthyllidifolia (Rosaceae) and Invasive Psidium cattleianum (Myrtaceae)	2006	<1	Sandy		Acidic	Psidium cattleianum	Other	Taproot	Perennial	185	5		>1	Mixed	Mixed	Mixed	1.18493	0.65691	0.05488	0.68671	0.105643	0.673181	0.0787431
30	59	Arbuscular mycorrhizae in a tropical sand dune ecosystem on the Gulf of Mexico II. Effects of arbuscular mycorrhizal fungi on the growth of species distributed in different early successional stages	1997	>2.9	Sandy		Alkaline	Canavalia rosea	Fabaceae	Fibrous	Perennial	63	7		>1	Mixed	Mixed	Mixed	0.54	0.388778	0.0284638	0.188794	0.0675479	0.322615	0.0392973
30	60	Arbuscular mycorrhizae in a tropical sand dune ecosystem on the Gulf of Mexico II. Effects of arbuscular mycorrhizal fungi on the growth of species distributed in different early successional stages	1997	>2.9	Sandy		Alkaline	Chamaecrista chamaecristoides	Fabaceae	Taproot	Perennial	63	7		>1	Mixed	Mixed	Mixed	0.48	1.335	0.0948521	1.50408	0.173611	1.41369	0.128386
30	61	Arbuscular mycorrhizae in a tropical sand dune ecosystem on the Gulf of Mexico II. Effects of arbuscular mycorrhizal fungi on the growth of species distributed in different early successional stages	1997	>2.9	Sandy		Alkaline	Ipomoea pes-caprae	Other	Taproot	Perennial	63	7		>1	Mixed	Mixed	Mixed	0.95	-0.152341	0.0844265	0.111226	0.134871	-0.0170944	0.108229
30	62	Arbuscular mycorrhizae in a tropical sand dune ecosystem on the Gulf of Mexico II. Effects of arbuscular mycorrhizal fungi on the growth of species distributed in different early successional stages	1997	>2.9	Sandy		Alkaline	Palafoxia lindenii	Asteraceae	Taproot	Perennial	63	7		>1	Mixed	Mixed	Mixed	0.7	1.09861	0.0834568	0.693147	0.140625	0.955511	0.0997609
30	63	Arbuscular mycorrhizae in a tropical sand dune ecosystem on the Gulf of Mexico II. Effects of arbuscular mycorrhizal fungi on the growth of species distributed in different early successional stages	1997	>2.9	Sandy		Alkaline	Panicum purpurascens	Poaceae	Taproot	Perennial	63	7		>1	Mixed	Mixed	Mixed	1.19	3.07577	0.0292571	1.45529	0.192744	2.51022	0.0620435
30	64	Arbuscular mycorrhizae in a tropical sand dune ecosystem on the Gulf of Mexico II. Effects of arbuscular mycorrhizal fungi on the growth of species distributed in different early successional stages	1997	>2.9	Sandy		Alkaline	Sporobolus virginicus	Poaceae	Fibrous	Annual	63	7		>1	Mixed	Mixed	Mixed	0.55	0.367725	0.15359	0	0.4304	0.251314	0.228442
30	65	Arbuscular mycorrhizae in a tropical sand dune ecosystem on the Gulf of Mexico II. Effects of arbuscular mycorrhizal fungi on the growth of species distributed in different early successional stages	1997	>2.9	Sandy		Alkaline	Trachypogon gouinii	Poaceae	Fibrous	Perennial	63	7		>1	Mixed	Mixed	Mixed	1.15	1.50408	0.951883	2.5177	0.460046	2.09074	0.706821
31	66	Arbuscular mycorrhizae, a tool to enhance the recovery and re-introduction of Juglans venezuelensis Manning, an endemic tree on the brink of extinction	2014	>2.9	Sandy		Neutral	Juglans venezuelensis	Other	Taproot	Perennial	60	10	44.6	1	Gigaspora heterogama	Gigasporaceae	Edaphophilic guild	0.971338	0.49283	0.002	0.211933	0.002	0.364239	0.002
31	67	Arbuscular mycorrhizae, a tool to enhance the recovery and re-introduction of Juglans venezuelensis Manning, an endemic tree on the brink of extinction	2014	>2.9	Sandy		Neutral	Juglans venezuelensis	Other	Taproot	Perennial	60	10	43.4	1	Rhizophagus manihotis	Glomeraceae	Rhizophilic guild	0.971338	0.467213	0.002	0.32706	0.002	0.400607	0.002
32	68	Arbuscular mycorrhizal (AM) technology for the conservation of Curculigo orchioides Gaertn.: an endangered medicinal herb	2008	<1	No_sandy			Curculigo orchioides	Other	Fibrous	Perennial	120	20		>1	Mixed	Glomeraceae	Rhizophilic guild	0.625	0.117783	0.001	1.28093	0.001	0.730888	0.001
32	69	Arbuscular mycorrhizal (AM) technology for the conservation of Curculigo orchioides Gaertn.: an endangered medicinal herb	2008	<1	No_sandy			Curculigo orchioides	Other	Fibrous	Perennial	120	20		1	Funneliformis geosporum	Glomeraceae	Rhizophilic guild	0.625	0.485508	0.001	1.09861	0.001	0.767255	0.001
32	70	Arbuscular mycorrhizal (AM) technology for the conservation of Curculigo orchioides Gaertn.: an endangered medicinal herb	2008	<1	No_sandy			Curculigo orchioides	Other	Fibrous	Perennial	120	20		1	Glomus macrocarpum	Glomeraceae	Rhizophilic guild	0.625	0.559616	0.001	1.16315	0.001	0.836248	0.001
33	71	Arbuscular mycorrhizal (Funneliformis mosseae) improves alfalfa (Medicago sativa L.) re-growth ability in saline soil through enhanced nitrogen remobilization and improved nutritional balance	2018	>2.9	No_sandy	P_deficent	Neutral	Medicago sativa	Fabaceae	Taproot	Perennial	92	5		1	Funneliformis mosseae	Glomeraceae	Rhizophilic guild	0.8073	0.242878	0.004	0.151558	0.004	0.203113	0.004
34	72	Arbuscular mycorrhizal associations in Solanum centrale (bush tomato), a perennial sub-shrub from the arid zone of Australia	2011	1_2.9	Sandy			Solanum centrale	Solanaceae	Fibrous	Annual	71	12	47.7	>1	Mixed	Mixed	Mixed	1.87181	3.19458	0.0922915	2.2705	0.052867	2.69183	0.0560578
35	73	Arbuscular mycorrhizal colonisation increases copper binding capacity of root cell walls of Oryza sativa L. and reduces copper uptake	2009	<1	Sandy			Oryza sativa	Poaceae	Fibrous	Annual	56	4		1	Funneliformis mosseae	Glomeraceae	Rhizophilic guild	0.286001	0.830671	0.0329338	0.718157	0.0248773	0.80672	0.0273546
36	74	Arbuscular Mycorrhizal Colonization Alters Subcellular Distribution and Chemical Forms of Cadmium in Medicago sativa L. and Resists Cadmium Toxicity	2012	<1	No_sandy	P_deficent	Acidic	Medicago sativa	Fabaceae	Taproot	Perennial	80	3	50	1	Rhizophagus intraradices	Glomeraceae	Rhizophilic guild	0.942532	0.165332	0.012841	0.32927	0.00142282	0.248234	0.00577535
37	75	Arbuscular mycorrhizal colonization and growth of wild and cultivated lettuce in response to nitrogen and phosphorus	2002	>2.9	Sandy	No_P_deficient		Lactuca sativa	Asteraceae	Taproot	Annual	42	4	90.8	1	Rhizophagus intraradices	Glomeraceae	Rhizophilic guild	0.331548	1.83296	0.0677568	2.35914	0.0999906	1.99203	0.0435837
37	76	Arbuscular mycorrhizal colonization and growth of wild and cultivated lettuce in response to nitrogen and phosphorus	2002	>2.9	Sandy	No_P_deficient		Lactuca serriola	Asteraceae	Taproot	Annual	42	4	79.8	1	Rhizophagus intraradices	Glomeraceae	Rhizophilic guild	0.613942	2.21976	0.0465209	1.81323	0.0946057	2.08386	0.0375573
38	77	Arbuscular mycorrhizal contribution to heavy metal uptake by maize (Zea mays L.) in pot culture with contaminated soil	1995		No_sandy		Alkaline	Zea mays	Poaceae	Fibrous	Annual	49	5	24.5	1	Funneliformis mosseae	Glomeraceae	Rhizophilic guild	0.0680851	0.308735	0.0128633	0.247836	0.00450113	0.304962	0.012087
39	78	Arbuscular mycorrhizal fungal communities influence growth and phosphorus concentration of woody plants species from the Atlantic rain forest in South Brazil	2007		No_sandy		Acidic	Alchornea glandulosa	Other	Taproot	Perennial	90	7		>1	Mixed	Mixed	Mixed	0.8125	2.29632	0.00285714	2.00976	0.00285714	2.17788	0.00285714
39	79	Arbuscular mycorrhizal fungal communities influence growth and phosphorus concentration of woody plants species from the Atlantic rain forest in South Brazil	2007		No_sandy		Acidic	Alchornea glandulosa	Other	Taproot	Perennial	90	7		>1	Mixed	Mixed	Mixed	0.8125	2.18324	0.00285714	1.68355	0.00285714	1.98929	0.00285714
39	80	Arbuscular mycorrhizal fungal communities influence growth and phosphorus concentration of woody plants species from the Atlantic rain forest in South Brazil	2007		No_sandy		Acidic	Cedrela fissilis	Other	Taproot	Perennial	90	7		>1	Mixed	Mixed	Mixed	0.5	3.29584	0.00285714	2.77259	0.00285714	3.14988	0.00285714
39	81	Arbuscular mycorrhizal fungal communities influence growth and phosphorus concentration of woody plants species from the Atlantic rain forest in South Brazil	2007		No_sandy		Acidic	Cedrela fissilis	Other	Taproot	Perennial	90	7		>1	Mixed	Mixed	Mixed	0.5	3.7612	0.00285714	3.3673	0.00285714	3.64632	0.00285714
39	82	Arbuscular mycorrhizal fungal communities influence growth and phosphorus concentration of woody plants species from the Atlantic rain forest in South Brazil	2007		No_sandy		Acidic	Citharexylum myrianthum	Other	Taproot	Perennial	90	7		>1	Mixed	Mixed	Mixed	0.1875	1.13943	0.00285714	1.94591	0.00285714	1.31824	0.00285714
39	83	Arbuscular mycorrhizal fungal communities influence growth and phosphorus concentration of woody plants species from the Atlantic rain forest in South Brazil	2007		No_sandy		Acidic	Citharexylum myrianthum	Other	Taproot	Perennial	90	7		>1	Mixed	Mixed	Mixed	0.1875	2.4901	0.00285714	3.45526	0.00285714	2.71852	0.00285714
39	84	Arbuscular mycorrhizal fungal communities influence growth and phosphorus concentration of woody plants species from the Atlantic rain forest in South Brazil	2007		No_sandy		Acidic	Schinus terebinthifolius	Other	Taproot	Perennial	90	7		>1	Mixed	Mixed	Mixed	0.4	3.10906	0.00285714	3.3499	0.00285714	3.18399	0.00285714
39	85	Arbuscular mycorrhizal fungal communities influence growth and phosphorus concentration of woody plants species from the Atlantic rain forest in South Brazil	2007		No_sandy		Acidic	Schinus terebinthifolius	Other	Taproot	Perennial	90	7		>1	Mixed	Mixed	Mixed	0.4	2.73437	0.00285714	3.52636	0.00285714	3.03082	0.00285714
40	86	Arbuscular mycorrhizal fungal isolate e€ectiveness on growth and root colonization of Panicum virgatum in acidic soil	1999	1_2.9	No_sandy	P_deficent	Acidic	Panicum virgatum	Poaceae	Fibrous	Annual	88	5	23.8	1	Rhizophagus intraradices	Glomeraceae	Rhizophilic guild	1.01359	2.51144	0.004	1.40101	0.004	2.09963	0.004
40	87	Arbuscular mycorrhizal fungal isolate e€ectiveness on growth and root colonization of Panicum virgatum in acidic soil	1999	1_2.9	No_sandy	P_deficent	Acidic	Panicum virgatum	Poaceae	Fibrous	Annual	88	5	7.3	1	Gigaspora rosea	Gigasporaceae	Edaphophilic guild	1.01359	-0.00941049	0.004	-0.12071	0.004	-0.0638878	0.004
40	88	Arbuscular mycorrhizal fungal isolate e€ectiveness on growth and root colonization of Panicum virgatum in acidic soil	1999	1_2.9	No_sandy	P_deficent	Acidic	Panicum virgatum	Poaceae	Fibrous	Annual	88	5	25.9	1	Gigaspora albida	Gigasporaceae	Edaphophilic guild	1.01359	2.92488	0.004	0.908128	0.004	2.35151	0.004
40	89	Arbuscular mycorrhizal fungal isolate e€ectiveness on growth and root colonization of Panicum virgatum in acidic soil	1999	1_2.9	No_sandy	P_deficent	Acidic	Panicum virgatum	Poaceae	Fibrous	Annual	88	5	15.3	1	Claroideoglomus etunicatum	Claroideoglomeraceae	Rhizophilic guild	1.01359	3.6124	0.004	1.50883	0.004	3.02909	0.004
40	90	Arbuscular mycorrhizal fungal isolate e€ectiveness on growth and root colonization of Panicum virgatum in acidic soil	1999	1_2.9	No_sandy	P_deficent	Acidic	Panicum virgatum	Poaceae	Fibrous	Annual	88	5	13.4	1	Gigaspora margarita	Gigasporaceae	Edaphophilic guild	1.01359	3.5242	0.004	1.58393	0.004	2.96023	0.004
40	91	Arbuscular mycorrhizal fungal isolate e€ectiveness on growth and root colonization of Panicum virgatum in acidic soil	1999	1_2.9	No_sandy	P_deficent	Acidic	Panicum virgatum	Poaceae	Fibrous	Annual	88	5	33.9	1	Acaulospora morrowiae	Acaulosporaceae	Ancestral guild	1.01359	3.13322	0.004	2.43237	0.004	2.8407	0.004
40	92	Arbuscular mycorrhizal fungal isolate e€ectiveness on growth and root colonization of Panicum virgatum in acidic soil	1999	1_2.9	No_sandy	P_deficent	Acidic	Panicum virgatum	Poaceae	Fibrous	Annual	88	5	22.7	1	Glomus diaphanum	Glomeraceae	Rhizophilic guild	1.01359	3.62347	0.004	1.84437	0.004	3.08149	0.004
40	93	Arbuscular mycorrhizal fungal isolate e€ectiveness on growth and root colonization of Panicum virgatum in acidic soil	1999	1_2.9	No_sandy	P_deficent	Acidic	Panicum virgatum	Poaceae	Fibrous	Annual	88	5	30.2	1	Rhizophagus clarus	Glomeraceae	Rhizophilic guild	1.01359	3.46727	0.004	2.75318	0.004	3.17034	0.004
41	94	Arbuscular mycorrhizal fungi alleviate arsenic toxicity to Medicago sativa by influencing arsenic speciation and partitioning	2018	<1	Sandy	P_deficent	Alkaline	Medicago sativa	Fabaceae	Taproot	Perennial	60	4	38	1	Rhizophagus irregularis	Glomeraceae	Rhizophilic guild	0.778914	0.781085	0.0295139	0.438275	0.0320719	0.645175	0.0306648
42	95	Arbuscular mycorrhizal fungi alleviate Cd phytotoxicity by altering Cd subcellular distribution and chemical forms in Zea mays	2019	>2.9	No_sandy	No_P_deficient	Acidic	Zea mays	Poaceae	Fibrous	Annual	70	5	71	1	Rhizophagus intraradices	Glomeraceae	Rhizophilic guild	0.466604	0.355404	0.00502049	0.189219	0.0054957	0.305465	0.0051639
42	96	Arbuscular mycorrhizal fungi alleviate Cd phytotoxicity by altering Cd subcellular distribution and chemical forms in Zea mays	2019	>2.9	No_sandy	No_P_deficient	Acidic	Zea mays	Poaceae	Fibrous	Annual	70	5	72	1	Diversispora versiformis	Diversisporaceae	Edaphophilic guild	0.466604	0.495935	0.00538385	0.272576	0.00522191	0.430131	0.00534813
43	97	Arbuscular mycorrhizal fungi alleviate iron deficient chlorosis in Poncirus trifoliata L. Raf under calcium bicarbonate stress	2007	>2.9	Sandy		Acidic	Poncirus trifoliata	Rutaceae	Taproot	Perennial	30	3	83.2	1	Diversispora versiformis	Diversisporaceae	Edaphophilic guild	0.453704	0.105361	0.00666667	0.243346	0.00666667	0.150504	0.00666667
44	98	Arbuscular mycorrhizal fungi alleviate root damage stress induced by simulated coal mining subsidence ground ?	2019	>2.9	Sandy	No_P_deficient	Alkaline	Zea mays	Poaceae	Fibrous	Annual	40	6	80	1	Funneliformis mosseae	Glomeraceae	Rhizophilic guild	0.155106	0.225068	0.00821454	0.138951	0.00992813	0.213927	0.00843228
45	99	Arbuscular mycorrhizal fungi alter carbohydrate distribution and amino acid accumulation in Medicago truncatula under lead stress	2019	<1	Sandy	No_P_deficient	Alkaline	Medicago truncatula	Fabaceae	Taproot	Perennial	84	4		1	Rhizophagus irregularis	Glomeraceae	Rhizophilic guild	0.91137	0.386994	0.00955086	0.312179	0.0353857	0.352018	0.019028
46	100	Arbuscular mycorrhizal fungi alter the response of growth and nutrient uptake of snap bean (Phaseolus vulgaris L.) to O3	2010	1_2.9	No_sandy	No_P_deficient	Alkaline	Phaseolus vulgaris	Fabaceae	Taproot	Annual	75	3	56.5	1	Funneliformis mosseae	Glomeraceae	Rhizophilic guild	1.20212	-1.30486	0.00174426	-1.17109	0.000812932	-1.22962	0.000396286
47	101	Arbuscular mycorrhizal fungi altered the hypericin, pseudohypericin, and hyperforin content in flowers of Hypericum perforatum grown under contrasting P availability in a highly organic substrate	2016	>2.9	Sandy		Neutral	Hypericum perforatum	Other	Taproot	Perennial	40	4	42.5	>1	Mixed	Mixed	Mixed	2.53933	0.154968	0.00163421	0.273531	0.0164625	0.241432	0.0109329
48	102	Arbuscular Mycorrhizal Fungi and Arsenate Uptake by Brachiaria Grass (Brachiaria decumbens)	2015	<1	Sandy			Brachiaria decumbens	Poaceae	Fibrous	Perennial	30	4	58	1	Acaulospora scrobiculata	Acaulosporaceae	Ancestral guild	0.594854	0.292851	0.039624	0.481129	0.0303365	0.367282	0.0339331
49	103	Arbuscular mycorrhizal fungi and Bradyrhizobium co-inoculation enhances nitrogen fixation and growth of green grams (Vigna radiata L.) under water stress	2020	>2.9	Sandy		Acidic	Vigna radiata	Fabaceae	Taproot	Annual	40	6	56.23	1	Funneliformis mosseae	Glomeraceae	Rhizophilic guild	0.145833	1.35455	0.00957165	1.14513	0.0224743	1.3302	0.0104899
49	104	Arbuscular mycorrhizal fungi and Bradyrhizobium co-inoculation enhances nitrogen fixation and growth of green grams (Vigna radiata L.) under water stress	2020	>2.9	Sandy		Acidic	Vigna radiata	Fabaceae	Taproot	Annual	40	6	77.01	1	Rhizophagus irregularis	Glomeraceae	Rhizophilic guild	0.145833	1.41707	0.00821703	1.27297	0.0268082	1.39984	0.00981378
49	105	Arbuscular mycorrhizal fungi and Bradyrhizobium co-inoculation enhances nitrogen fixation and growth of green grams (Vigna radiata L.) under water stress	2020	>2.9	Sandy		Acidic	Vigna radiata	Fabaceae	Taproot	Annual	40	6	32.24	>1	Mixed	Glomeraceae	Rhizophilic guild	0.145833	1.11241	0.00770621	0.826679	0.211814	1.08026	0.0150439
50	106	Arbuscular mycorrhizal fungi and colonization stimulant in cotton and maize	2017	>2.9	No_sandy	No_P_deficient	Acidic	Gossypium hirsutum	Other	Taproot	Annual	45	5	15.3194	1	Acaulospora scrobiculata	Acaulosporaceae	Ancestral guild	0.164773	0.549828	0.004	0.129212	0.004	0.500036	0.004
50	107	Arbuscular mycorrhizal fungi and colonization stimulant in cotton and maize	2017	>2.9	No_sandy	No_P_deficient	Acidic	Gossypium hirsutum	Other	Taproot	Annual	45	5	12.8555	1	Claroideoglomus etunicatum	Claroideoglomeraceae	Rhizophilic guild	0.164773	0.449917	0.004	0.243622	0.004	0.423193	0.004
50	108	Arbuscular mycorrhizal fungi and colonization stimulant in cotton and maize	2017	>2.9	No_sandy	No_P_deficient	Acidic	Gossypium hirsutum	Other	Taproot	Annual	45	5	20.1319	1	Gigaspora heterogama	Gigasporaceae	Edaphophilic guild	0.164773	-0.173272	0.004	0.321584	0.004	-0.086568	0.004
50	109	Arbuscular mycorrhizal fungi and colonization stimulant in cotton and maize	2017	>2.9	No_sandy	No_P_deficient	Acidic	Gossypium hirsutum	Other	Taproot	Annual	45	5	15.0435	1	Gigaspora margarita	Gigasporaceae	Edaphophilic guild	0.164773	0.485508	0.004	0.243622	0.004	0.454642	0.004
50	110	Arbuscular mycorrhizal fungi and colonization stimulant in cotton and maize	2017	>2.9	No_sandy	No_P_deficient	Acidic	Gossypium hirsutum	Other	Taproot	Annual	45	5	85.2334	1	Rhizophagus clarus	Glomeraceae	Rhizophilic guild	0.164773	0.11272	0.004	0.0984401	0.004	0.110712	0.004
50	111	Arbuscular mycorrhizal fungi and colonization stimulant in cotton and maize	2017	>2.9	No_sandy	No_P_deficient	Acidic	Gossypium hirsutum	Other	Taproot	Annual	45	5	35.9864	>1	Mixed	Mixed	Mixed	0.164773	0.588418	0.004	0.439367	0.004	0.568634	0.004
50	112	Arbuscular mycorrhizal fungi and colonization stimulant in cotton and maize	2017	>2.9	No_sandy	No_P_deficient	Acidic	Zea mays	Poaceae	Fibrous	Annual	50	5	35.9902	1	Acaulospora scrobiculata	Acaulosporaceae	Ancestral guild	0.148475	-0.344368	0.004	0.930247	0.004	-0.0567885	0.004
50	113	Arbuscular mycorrhizal fungi and colonization stimulant in cotton and maize	2017	>2.9	No_sandy	No_P_deficient	Acidic	Zea mays	Poaceae	Fibrous	Annual	50	5	25.5903	1	Claroideoglomus etunicatum	Claroideoglomeraceae	Rhizophilic guild	0.148475	0.112956	0.004	0.617375	0.004	0.194362	0.004
50	114	Arbuscular mycorrhizal fungi and colonization stimulant in cotton and maize	2017	>2.9	No_sandy	No_P_deficient	Acidic	Zea mays	Poaceae	Fibrous	Annual	50	5	31.6604	1	Gigaspora heterogama	Gigasporaceae	Edaphophilic guild	0.148475	-1.02737	0.004	-0.108368	0.004	-0.849396	0.004
50	115	Arbuscular mycorrhizal fungi and colonization stimulant in cotton and maize	2017	>2.9	No_sandy	No_P_deficient	Acidic	Zea mays	Poaceae	Fibrous	Annual	50	5	38.2862	1	Gigaspora margarita	Gigasporaceae	Edaphophilic guild	0.148475	-0.37309	0.004	0.512985	0.004	-0.203937	0.004
50	116	Arbuscular mycorrhizal fungi and colonization stimulant in cotton and maize	2017	>2.9	No_sandy	No_P_deficient	Acidic	Zea mays	Poaceae	Fibrous	Annual	50	5	21.2961	1	Rhizophagus clarus	Glomeraceae	Rhizophilic guild	0.148475	1.1768	0.004	0.75853	0.004	1.1316	0.004
50	117	Arbuscular mycorrhizal fungi and colonization stimulant in cotton and maize	2017	>2.9	No_sandy	No_P_deficient	Acidic	Zea mays	Poaceae	Fibrous	Annual	50	5	54.158	>1	Mixed	Mixed	Mixed	0.148475	-0.0793073	0.004	0.46662	0.004	0.0104276	0.004
51	118	Arbuscular mycorrhizal fungi and organic fertilizer influence photosynthesis, root phosphatase activity, nutrition, and growth of Ipomoea carnea ssp. Fistulosa	2009	<1	Sandy		Neutral	Ipomoea carnea	Other	Taproot	Perennial	60	4	58	1	Rhizophagus intraradices	Glomeraceae	Rhizophilic guild	0.227723	0	0.00245074	0.231802	0.0123177	0.0392207	0.00254675
52	119	Arbuscular mycorrhizal fungi and organic manure have synergistic eﬀects on Trifolium repens in Cd-contaminated sterilized soil but not in natural soil	2020	<1	No_sandy		Acidic	Trifolium repens	Fabaceae	Fibrous	Perennial	118	4	54	>1	Mixed	Mixed	Mixed	0.28394	0.0393696	0.00479418	0.16981	0.0230902	0.0697169	0.00765707
53	120	Arbuscular mycorrhizal fungi and the associated bacterial community influence the uptake of cadmium in rice	2019	1_2.9	No_sandy		Acidic	Oryza sativa	Poaceae	Fibrous	Annual	50	3	36	1	Funneliformis mosseae	Glomeraceae	Rhizophilic guild	0.172671	0.168709	0.00460499	0.312126	0.0098313	0.191162	0.0052575
53	121	Arbuscular mycorrhizal fungi and the associated bacterial community influence the uptake of cadmium in rice	2019	1_2.9	No_sandy		Acidic	Oryza sativa	Poaceae	Fibrous	Annual	50	3	44	1	Rhizophagus intraradices	Glomeraceae	Rhizophilic guild	0.172671	-0.0559986	0.00481886	-0.093731	0.0145583	-0.0614659	0.0057924
54	122	Arbuscular mycorrhizal fungi and Trichoderma viride mediated Fusarium wilt control in tomato	2013	1_2.9	Sandy	No_P_deficient	Neutral	Lycopersicon esculentum	Solanaceae	Taproot	Annual	90	5	88.4	1	Funneliformis mosseae	Glomeraceae	Rhizophilic guild	0.312057	0.642227	0.0906287	0.658462	0.11556	0.646112	0.0876239
54	123	Arbuscular mycorrhizal fungi and Trichoderma viride mediated Fusarium wilt control in tomato	2013	1_2.9	Sandy	No_P_deficient	Neutral	Lycopersicon esculentum	Solanaceae	Taproot	Annual	90	5	71.94	1	Acaulospora laevis	Acaulosporaceae	Ancestral guild	0.312057	0.292987	0.0916767	0.390198	0.0631376	0.316978	0.0817961
55	124	Arbuscular mycorrhizal fungi can alleviate the adverse eﬀects of chlorothalonil on Oryza sativa L.	2006	<1	Sandy	No_P_deficient	Acidic	Oryza sativa	Poaceae	Fibrous	Annual	57	4	57	1	Funneliformis mosseae	Glomeraceae	Rhizophilic guild	0.552736	0.0891953	0.0428536	0.335738	0.021704	0.184077	0.0328883
56	125	Arbuscular mycorrhizal fungi can alter some root characters and physiological status in trifoliate orange (Poncirus trifoliata L. Raf.) seedlings	2011	>2.9	No_sandy			Poncirus trifoliata	Rutaceae	Taproot	Perennial	180	4	75.7	1	Funneliformis mosseae	Glomeraceae	Rhizophilic guild	0.36	0.392042	0.00452184	0.575364	0.0279707	0.443931	0.00228905
56	126	Arbuscular mycorrhizal fungi can alter some root characters and physiological status in trifoliate orange (Poncirus trifoliata L. Raf.) seedlings	2011	>2.9	No_sandy			Poncirus trifoliata	Rutaceae	Taproot	Perennial	180	4	66.1	1	Diversispora versiformis	Diversisporaceae	Edaphophilic guild	0.36	0.113329	0.00287551	0.287682	0.0401235	0.162519	0.00149005
56	127	Arbuscular mycorrhizal fungi can alter some root characters and physiological status in trifoliate orange (Poncirus trifoliata L. Raf.) seedlings	2011	>2.9	No_sandy			Poncirus trifoliata	Rutaceae	Taproot	Perennial	180	4	58.1	1	Paraglomus occultum	Paraglomeraceae	Rhizophilic guild	0.36	0.277632	0.0052731	0.367725	0.0360143	0.302281	0.00511836
57	128	Arbuscular mycorrhizal fungi can shift plant-soil feedback of grass-endophyte symbiosis from negative to positive	2017	1_2.9	Sandy			Lolium mutiflorum	Poaceae	Fibrous	Perennial	90	6	67	>1	Mixed	Mixed	Mixed	0.221425	0.587748	0.0258169	0.509078	0.143722	0.573938	0.0387563
58	129	Arbuscular Mycorrhizal Fungi Confer Salt Tolerance in Giant Reed (Arundo donax L.) Plants Grown Under Low Phosphorus by Reducing Leaf Na + Concentration and Improving Phosphorus Use Ef?ciency	2019	>2.9	Sandy		Acidic	Arundo donax	Poaceae	Fibrous	Perennial	90	6		1	Funneliformis mosseae	Glomeraceae	Rhizophilic guild	0.487072	0.191182	0.0086104	0.610414	0.0204243	0.348681	0.0125147
59	130	Arbuscular Mycorrhizal Fungi Contribute to Resistance of Upland Rice to Combined Metal Contamination of Soil	2005	<1	No_sandy		Acidic	Oryza sativa	Poaceae	Fibrous	Annual	56	3	48	1	Diversispora versiformis	Diversisporaceae	Edaphophilic guild	0.200737	0.293552	0.00732076	0.918856	0.130562	0.429172	0.0145298
59	131	Arbuscular Mycorrhizal Fungi Contribute to Resistance of Upland Rice to Combined Metal Contamination of Soil	2005	<1	No_sandy		Acidic	Oryza sativa	Poaceae	Fibrous	Annual	56	3	46	1	Funneliformis mosseae	Glomeraceae	Rhizophilic guild	0.200737	0.59042	0.041181	1.23656	0.139287	0.731768	0.0407399
59	132	Arbuscular Mycorrhizal Fungi Contribute to Resistance of Upland Rice to Combined Metal Contamination of Soil	2005	<1	No_sandy		Acidic	Oryza sativa	Poaceae	Fibrous	Annual	56	3	32	1	Glomus diaphanum	Glomeraceae	Rhizophilic guild	0.200737	0.345391	0.0399949	1.04783	0.19733	0.50265	0.0558742
59	133	Arbuscular Mycorrhizal Fungi Contribute to Resistance of Upland Rice to Combined Metal Contamination of Soil	2005	<1	No_sandy		Acidic	Oryza sativa	Poaceae	Fibrous	Annual	56	3	57	1	Diversispora versiformis	Diversisporaceae	Edaphophilic guild	0.410891	0.123803	0.0135037	0.150497	0.0473686	0.131651	0.0204343
59	134	Arbuscular Mycorrhizal Fungi Contribute to Resistance of Upland Rice to Combined Metal Contamination of Soil	2005	<1	No_sandy		Acidic	Oryza sativa	Poaceae	Fibrous	Annual	56	3	30	1	Funneliformis mosseae	Glomeraceae	Rhizophilic guild	0.410891	0.631921	0.0212821	0.559078	0.0193761	0.611249	0.0207031
59	135	Arbuscular Mycorrhizal Fungi Contribute to Resistance of Upland Rice to Combined Metal Contamination of Soil	2005	<1	No_sandy		Acidic	Oryza sativa	Poaceae	Fibrous	Annual	56	3	71.5	1	Glomus diaphanum	Glomeraceae	Rhizophilic guild	0.410891	0.316887	0.0150773	0.10309	0.00783294	0.259197	0.0129188
60	136	Arbuscular mycorrhizal fungi enhance antioxidant defense in the leaves and the retention of heavy metals in the roots of maize	2018	>2.9	No_sandy	No_P_deficient	Acidic	Zea mays	Poaceae	Fibrous	Annual	60	4	42.9	1	Funneliformis mosseae	Glomeraceae	Rhizophilic guild	0.525074	0.669402	0.0383295	0.284055	0.0459155	0.552755	0.0395225
60	137	Arbuscular mycorrhizal fungi enhance antioxidant defense in the leaves and the retention of heavy metals in the roots of maize	2018	>2.9	No_sandy	No_P_deficient	Acidic	Zea mays	Poaceae	Fibrous	Annual	60	4	47.7	1	Diversispora spurcum	Diversisporaceae	Edaphophilic guild	0.525074	0.0592962	0.015589	0.359342	0.0537076	0.17305	0.0268164
61	138	Arbuscular mycorrhizal fungi enhance root cadmium and copper accumulation in the roots of the salt marsh plant Aster tripolium L.	2006	>2.9	Sandy			Aster tripolium	Asteraceae	Taproot	Perennial	35	5	48	>1	Mixed	Mixed	Mixed	1.31063	-0.380967	0.018673	-0.366463	0.00514843	-0.372715	0.00994999
61	139	Arbuscular mycorrhizal fungi enhance root cadmium and copper accumulation in the roots of the salt marsh plant Aster tripolium L.	2006	>2.9	Sandy			Aster tripolium	Asteraceae	Taproot	Perennial	35	5	59	>1	Mixed	Mixed	Mixed	1.31063	-0.416285	0.0131179	-0.491113	0.00438567	-0.458039	0.00751565
62	140	Arbuscular Mycorrhizal Fungi Enhance Zinc and Nickel Uptake from Contaminated Soil by Soybean and Lentil	2006	1_2.9	Sandy			Glycine max	Fabaceae	Taproot	Annual	84	5	55.3	1	Funneliformis mosseae	Glomeraceae	Rhizophilic guild	0.0431583	0.888003	0.00797696	2.29554	0.158959	1.00816	0.010016
63	141	Arbuscular mycorrhizal fungi improve reestablishment of Leymus chinensis in bare saline-alkaline soil: Implication on vegetation restoration of extremely degraded land	2011	>2.9			Alkaline	Leymus chinensis	Poaceae	Fibrous	Perennial	75	4	38.22	>1	Mixed	Mixed	Mixed	0.262829	0.684941	0.0497967	1.75919	0.0758194	1.02229	0.0571684
64	142	Arbuscular mycorrhizal fungi improve the?growth and?drought tolerance of?Zenia insignis seedlings under?drought stress	2018	1_2.9	No_sandy			Zenia insignis	Fabaceae	Taproot	Perennial	210	6	63.5	1	Funneliformis mosseae	Glomeraceae	Rhizophilic guild	0.348837	0.0674413	0.0091208	0.0645385	8.35e-05	0.0666914	0.00535672
64	143	Arbuscular mycorrhizal fungi improve the?growth and?drought tolerance of?Zenia insignis seedlings under?drought stress	2018	1_2.9	No_sandy			Zenia insignis	Fabaceae	Taproot	Perennial	210	6	50.1	1	Diversispora versiformis	Diversisporaceae	Edaphophilic guild	0.348837	0.0229895	0.00951626	0	8.89e-05	0.0170944	0.00561742
64	144	Arbuscular mycorrhizal fungi improve the?growth and?drought tolerance of?Zenia insignis seedlings under?drought stress	2018	1_2.9	No_sandy			Zenia insignis	Fabaceae	Taproot	Perennial	210	6	53.5	1	Rhizophagus intraradices	Glomeraceae	Rhizophilic guild	0.348837	0.0454624	0.00931194	0	8.89e-05	0.0339016	0.00552616
64	145	Arbuscular mycorrhizal fungi improve the?growth and?drought tolerance of?Zenia insignis seedlings under?drought stress	2018	1_2.9	No_sandy			Zenia insignis	Fabaceae	Taproot	Perennial	210	6	65.5	>1	Mixed	Mixed	Mixed	0.348837	0.0889475	0.00894174	0.182322	0.00313086	0.113944	0.0066437
65	146	Arbuscular mycorrhizal fungi improve the growth of olive trees and their resistance to transplantation stress	2010	<1	No_sandy	No_P_deficient	Alkaline	Olea europaea	Other	Taproot	Perennial	270	5	51.06	1	Funneliformis mosseae	Glomeraceae	Rhizophilic guild	0.392857	1.47386	0.0897039	1.84343	0.137783	1.59263	0.0986311
65	147	Arbuscular mycorrhizal fungi improve the growth of olive trees and their resistance to transplantation stress	2010	<1	No_sandy	No_P_deficient	Alkaline	Olea europaea	Other	Taproot	Perennial	270	5	69.96	1	Rhizophagus intraradices	Glomeraceae	Rhizophilic guild	0.392857	1.10158	0.0445727	1.40877	0.16438	1.19819	0.0744056
66	148	Arbuscular mycorrhizal fungi improved plant growth and nutrient acquisition of desert ephemeral Plantago minuta under variable soil water conditions	2014	<1	Sandy	P_deficent	Alkaline	Plantago minuta	Other	Taproot	Perennial	84	6	66	1	Claroideoglomus etunicatum	Claroideoglomeraceae	Rhizophilic guild	1.66442	0.327051	0.0148119	-0.222364	0.0273215	0.0189082	0.0229086
66	149	Arbuscular mycorrhizal fungi improved plant growth and nutrient acquisition of desert ephemeral Plantago minuta under variable soil water conditions	2014	<1	Sandy	P_deficent	Alkaline	Plantago minuta	Other	Taproot	Perennial	84	6	62	1	Funneliformis mosseae	Glomeraceae	Rhizophilic guild	1.66442	0.51122	0.0127359	0.107384	0.0204328	0.277476	0.0157505
67	150	Arbuscular mycorrhizal fungi seedling formation of barbados cherry (Malpighia emarginata D.C.)	2019	<1	Sandy		Alkaline	Malpighia emarginata	Other	Taproot	Perennial	60	10	48	1	Gigaspora margarita	Gigasporaceae	Edaphophilic guild	0.30303	0.339354	0.002	0.262364	0.002	0.321971	0.002
67	151	Arbuscular mycorrhizal fungi seedling formation of barbados cherry (Malpighia emarginata D.C.)	2019	<1	Sandy		Alkaline	Malpighia emarginata	Other	Taproot	Perennial	60	10	56	1	Rhizophagus clarus	Glomeraceae	Rhizophilic guild	0.30303	-0.663294	0.002	-0.836248	0.002	-0.700929	0.002
67	152	Arbuscular mycorrhizal fungi seedling formation of barbados cherry (Malpighia emarginata D.C.)	2019	<1	Sandy		Alkaline	Malpighia emarginata	Other	Taproot	Perennial	60	10	74	1	Claroideoglomus etunicatum	Claroideoglomeraceae	Rhizophilic guild	0.30303	-0.83392	0.002	-1.0033	0.002	-0.870828	0.002
67	153	Arbuscular mycorrhizal fungi seedling formation of barbados cherry (Malpighia emarginata D.C.)	2019	<1	Sandy		Alkaline	Malpighia emarginata	Other	Taproot	Perennial	60	10	51	>1	Mixed	Mixed	Mixed	0.30303	0.249067	0.002	0.125163	0.002	0.221592	0.002
67	154	Arbuscular mycorrhizal fungi seedling formation of barbados cherry (Malpighia emarginata D.C.)	2019	<1	Sandy		Alkaline	Malpighia emarginata	Other	Taproot	Perennial	60	10	41	>1	Mixed	Mixed	Mixed	0.30303	-0.7033	0.002	-0.76214	0.002	-0.716678	0.002
67	155	Arbuscular mycorrhizal fungi seedling formation of barbados cherry (Malpighia emarginata D.C.)	2019	<1	Sandy		Alkaline	Malpighia emarginata	Other	Taproot	Perennial	60	10	33	>1	Mixed	Mixed	Mixed	0.30303	-0.436237	0.002	-0.76214	0.002	-0.503104	0.002
67	156	Arbuscular mycorrhizal fungi seedling formation of barbados cherry (Malpighia emarginata D.C.)	2019	<1	Sandy		Alkaline	Malpighia emarginata	Other	Taproot	Perennial	60	10	33	>1	Mixed	Mixed	Mixed	0.30303	-0.188401	0.002	-0.223144	0.002	-0.196373	0.002
67	157	Arbuscular mycorrhizal fungi seedling formation of barbados cherry (Malpighia emarginata D.C.)	2019	<1	Sandy		Alkaline	Malpighia emarginata	Other	Taproot	Perennial	60	10	48	1	Gigaspora margarita	Gigasporaceae	Edaphophilic guild	0.327586	0.159065	0.002	-0.37949	0.002	0.0506437	0.002
67	158	Arbuscular mycorrhizal fungi seedling formation of barbados cherry (Malpighia emarginata D.C.)	2019	<1	Sandy		Alkaline	Malpighia emarginata	Other	Taproot	Perennial	60	10	56	1	Rhizophagus clarus	Glomeraceae	Rhizophilic guild	0.327586	0.524524	0.002	-0.17185	0.002	0.392393	0.002
67	159	Arbuscular mycorrhizal fungi seedling formation of barbados cherry (Malpighia emarginata D.C.)	2019	<1	Sandy		Alkaline	Malpighia emarginata	Other	Taproot	Perennial	60	10	74	1	Claroideoglomus etunicatum	Claroideoglomeraceae	Rhizophilic guild	0.327586	0.159065	0.002	-0.305382	0.002	0.0629138	0.002
67	160	Arbuscular mycorrhizal fungi seedling formation of barbados cherry (Malpighia emarginata D.C.)	2019	<1	Sandy		Alkaline	Malpighia emarginata	Other	Taproot	Perennial	60	10	51	>1	Mixed	Mixed	Mixed	0.327586	0.461346	0.002	-0.236389	0.002	0.329023	0.002
67	161	Arbuscular mycorrhizal fungi seedling formation of barbados cherry (Malpighia emarginata D.C.)	2019	<1	Sandy		Alkaline	Malpighia emarginata	Other	Taproot	Perennial	60	10	41	>1	Mixed	Mixed	Mixed	0.327586	0.188052	0.002	-0.305382	0.002	0.0870114	0.002
67	162	Arbuscular mycorrhizal fungi seedling formation of barbados cherry (Malpighia emarginata D.C.)	2019	<1	Sandy		Alkaline	Malpighia emarginata	Other	Taproot	Perennial	60	10	33	>1	Mixed	Mixed	Mixed	0.327586	0	0.002	-1.15268	0.002	-0.184922	0.002
67	163	Arbuscular mycorrhizal fungi seedling formation of barbados cherry (Malpighia emarginata D.C.)	2019	<1	Sandy		Alkaline	Malpighia emarginata	Other	Taproot	Perennial	60	10	33	>1	Mixed	Mixed	Mixed	0.327586	0.129212	0.002	-0.17185	0.002	0.0629138	0.002
68	164	Arbuscular mycorrhizal fungi increased early growth of two nontimber forest product species Dyera polyphylla and Aquilaria filaria under greenhouse conditions	2006	<1	No_sandy	P_deficent	Acidic	Aquilaria filaria	Other	Taproot	Perennial	90	4	39	1	Rhizophagus clarus	Glomeraceae	Rhizophilic guild	0.517241	0.950192	0.005	0.693147	0.005	0.869771	0.005
68	165	Arbuscular mycorrhizal fungi increased early growth of two nontimber forest product species Dyera polyphylla and Aquilaria filaria under greenhouse conditions	2006	<1	No_sandy	P_deficent	Acidic	Aquilaria filaria	Other	Taproot	Perennial	90	4	22	1	Glomus decipiens	Glomeraceae	Rhizophilic guild	0.517241	0.97651	0.005	0.757686	0.005	0.907158	0.005
69	166	Arbuscular mycorrhizal fungi induced biochemical changes in pea (Pisum sativum) and their effect on powdery mildew (Erysiphe pisi)	2003	>2.9	No_sandy			Pisum sativum	Fabaceae	Taproot	Annual	45	4	78.49	1	Funneliformis mosseae	Glomeraceae	Rhizophilic guild	0.435118	0.303048	0.174824	0.149173	0.0131618	0.258844	0.10265
69	167	Arbuscular mycorrhizal fungi induced biochemical changes in pea (Pisum sativum) and their effect on powdery mildew (Erysiphe pisi)	2003	>2.9	No_sandy			Pisum sativum	Fabaceae	Taproot	Annual	45	4	69.36	1	Funneliformis mosseae	Glomeraceae	Rhizophilic guild	0.53159	0.403358	0.136385	0.295936	0.00614572	0.367367	0.0721351
69	168	Arbuscular mycorrhizal fungi induced biochemical changes in pea (Pisum sativum) and their effect on powdery mildew (Erysiphe pisi)	2003	>2.9	No_sandy			Pisum sativum	Fabaceae	Taproot	Annual	45	4	73.08	1	Funneliformis mosseae	Glomeraceae	Rhizophilic guild	0.613256	0.356732	0.150463	0.0917959	0.00226213	0.264096	0.0720285
70	169	Arbuscular mycorrhizal fungi influence tomato competition with bahiagrass	2001	1_2.9	No_sandy	P_deficent	Acidic	Lycopersicon esculentum	Solanaceae	Taproot	Annual	110	5	62	>1	Mixed	Mixed	Rhizophilic guild	0.132898	1.22598	0.0188103	1.16029	0.0343624	1.2185	0.0203162
70	170	Arbuscular mycorrhizal fungi influence tomato competition with bahiagrass	2001	1_2.9	No_sandy	P_deficent	Acidic	Lycopersicon esculentum	Solanaceae	Taproot	Annual	110	5	52	1	Claroideoglomus etunicatum	Claroideoglomeraceae	Rhizophilic guild	0.132898	1.16906	0.0262815	1.15851	0.0401467	1.16783	0.0275885
70	171	Arbuscular mycorrhizal fungi influence tomato competition with bahiagrass	2001	1_2.9	No_sandy	P_deficent	Acidic	Lycopersicon esculentum	Solanaceae	Taproot	Annual	110	5	27	1	Rhizophagus fasciculatus	Glomeraceae	Rhizophilic guild	0.132898	0.305863	0.0283725	0.25691	0.0359512	0.300243	0.0288564
71	172	Arbuscular mycorrhizal fungi influence water relations, gas exchange, abscisic acid and growth of micropropagated chile ancho pepper (Capsicumannuum ) plantlets during acclimatization and post- acclimatization	2003	<1	Sandy			Capsicum annuum	Solanaceae	Fibrous	Annual	48	5	45	>1	Mixed	Mixed	Mixed	0.45	0.0953102	0.004	-0.117783	0.004	0.0339016	0.004
72	173	Arbuscular Mycorrhizal Fungi Inoculation to Enhance Chilling Stress Tolerance of Watermelon	2020	<1	No_sandy			Citrullus lanatus	Other	Fibrous	Annual	35	3		1	Rhizophagus intraradices	Glomeraceae	Rhizophilic guild	0.0956938	0.158924	0.00666667	0.300105	0.00666667	0.17208	0.00666667
72	174	Arbuscular Mycorrhizal Fungi Inoculation to Enhance Chilling Stress Tolerance of Watermelon	2020	<1	No_sandy			Citrullus lanatus	Other	Fibrous	Annual	35	3		1	Rhizophagus intraradices	Glomeraceae	Rhizophilic guild	0.14359	0.41058	0.00666667	0.278713	0.00666667	0.394947	0.00666667
73	175	Arbuscular Mycorrhizal Fungi Mediate Drought Tolerance and Recovery in Two Contrasting Carob (Ceratonia siliqua L.) Ecotypes by Regulating Stomatal, Water Relations, and (In)Organic Adjustments	2020	1_2.9		No_P_deficient	Alkaline	Ceratonia siliqua	Fabaceae	Taproot	Perennial	180	5	62	>1	Mixed	Mixed	Mixed	0.727273	0.230906	0.0408697	0.369097	0.042356	0.291434	0.0410822
73	176	Arbuscular Mycorrhizal Fungi Mediate Drought Tolerance and Recovery in Two Contrasting Carob (Ceratonia siliqua L.) Ecotypes by Regulating Stomatal, Water Relations, and (In)Organic Adjustments	2020	1_2.9		No_P_deficient	Alkaline	Ceratonia siliqua	Fabaceae	Taproot	Perennial	180	5	62	>1	Mixed	Mixed	Mixed	0.926471	0.257829	0.0704825	0.0909718	0.0307001	0.181048	0.0497923
74	177	Arbuscular mycorrhizal fungi mediate herbivore-induction of plant defenses differently above and belowground	2018	<1	No_sandy			Asclepias curassavica	Other	Taproot	Perennial	90	15	25	>1	Mixed	Mixed	Mixed	2.1471	-0.223667	0.00683419	-0.340449	0.0140969	-0.301843	0.0113719
74	178	Arbuscular mycorrhizal fungi mediate herbivore-induction of plant defenses differently above and belowground	2018	<1	No_sandy			Asclepias incarnata	Other	Taproot	Perennial	90	15	38	>1	Mixed	Mixed	Mixed	1.79387	-0.229804	0.00615537	-0.454107	0.00478495	-0.367929	0.00529086
74	179	Arbuscular mycorrhizal fungi mediate herbivore-induction of plant defenses differently above and belowground	2018	<1	No_sandy			Asclepias latifolia	Other	Taproot	Perennial	90	15	36	>1	Mixed	Mixed	Mixed	0.777144	0.132568	0.00713231	0.0455789	0.0147126	0.0954548	0.0100408
74	180	Arbuscular mycorrhizal fungi mediate herbivore-induction of plant defenses differently above and belowground	2018	<1	No_sandy			Asclepias syriaca	Other	Taproot	Perennial	90	15	56	>1	Mixed	Mixed	Mixed	1.56507	-0.0700219	0.00415836	-0.163034	0.00640892	-0.125737	0.0053654
75	181	Arbuscular mycorrhizal fungi mediated uptake of lanthanum in Chinese milk vetch (Astragalus sinicus L.)	2007	<1	Sandy	No_P_deficient	Acidic	Astragalus sinicus	Fabaceae	Taproot	Annual	42	3	83	1	Gigaspora margarita	Gigasporaceae	Edaphophilic guild	1.04539	1.85728	0.015459	1.56142	0.00392068	1.71699	0.00857259
75	182	Arbuscular mycorrhizal fungi mediated uptake of lanthanum in Chinese milk vetch (Astragalus sinicus L.)	2007	<1	Sandy	No_P_deficient	Acidic	Astragalus sinicus	Fabaceae	Taproot	Annual	42	3	59	1	Rhizophagus intraradices	Glomeraceae	Rhizophilic guild	1.04539	0.990542	0.0167908	0.865841	0.0208315	0.928751	0.0160567
75	183	Arbuscular mycorrhizal fungi mediated uptake of lanthanum in Chinese milk vetch (Astragalus sinicus L.)	2007	<1	Sandy	No_P_deficient	Acidic	Astragalus sinicus	Fabaceae	Taproot	Annual	42	3	16	1	Acaulospora laevis	Acaulosporaceae	Ancestral guild	1.04539	0.641666	0.0340599	0.285522	0.0160152	0.475447	0.0242716
76	184	Arbuscular mycorrhizal fungi might alleviate aluminium toxicity in banana plants	2000	>2.9	Sandy			Musa acuminata	Other	Fibrous	Perennial	40	4	87	1	Rhizophagus intraradices	Glomeraceae	Rhizophilic guild	0.303902	0.0313669	0.0115488	0.155477	0.00513525	0.0617003	0.00966379
77	185	Arbuscular mycorrhizal fungi native from a Mediterranean saline area enhance maize tolerance to salinity through improved ion homeostasis	2013	<1	Sandy	No_P_deficient	Alkaline	Zea mays	Poaceae	Fibrous	Annual	83	10	67.4623	1	Rhizophagus intraradices	Glomeraceae	Rhizophilic guild	0.503788	-0.0482659	0.00297148	-0.141789	0.00199004	-0.0786334	0.00261777
77	186	Arbuscular mycorrhizal fungi native from a Mediterranean saline area enhance maize tolerance to salinity through improved ion homeostasis	2013	<1	Sandy	No_P_deficient	Alkaline	Zea mays	Poaceae	Fibrous	Annual	83	10	21.3411	1	Rhizophagus intraradices	Glomeraceae	Rhizophilic guild	0.503788	0.228803	0.00447829	-0.0897564	0.00878616	0.13296	0.00531915
77	187	Arbuscular mycorrhizal fungi native from a Mediterranean saline area enhance maize tolerance to salinity through improved ion homeostasis	2013	<1	Sandy	No_P_deficient	Alkaline	Zea mays	Poaceae	Fibrous	Annual	83	10	34.2501	1	Claroideoglomus claroideum	Claroideoglomeraceae	Rhizophilic guild	0.503788	-0.059653	0.00722483	-0.324613	0.0183576	-0.14084	0.00961011
77	188	Arbuscular mycorrhizal fungi native from a Mediterranean saline area enhance maize tolerance to salinity through improved ion homeostasis	2013	<1	Sandy	No_P_deficient	Alkaline	Zea mays	Poaceae	Fibrous	Annual	83	10	62.3121	1	Claroideoglomus etunicatum	Claroideoglomeraceae	Rhizophilic guild	0.503788	0.216135	0.00264536	0.0751335	0.00925532	0.171077	0.00389687
78	189	Arbuscular mycorrhizal fungi on growth, nutrient status, and total antioxidant activity of Melilotus albus during phytoremediation of a diesel-contaminated substrate	2012	<1	Sandy			Melilotus albus	Fabaceae	Taproot	Annual	60	3	5	>1	Mixed	Mixed	Mixed	0.156404	0.192215	0.00666667	0.102528	0.00666667	0.180545	0.00666667
79	190	Arbuscular mycorrhizal fungi reduce development of pea root-rot caused by Aphanomyces euteiches using oospores as pathogen inoculum	2004	<1	Sandy			Pisum sativum	Fabaceae	Taproot	Annual	33	5	77	1	Rhizophagus intraradices	Glomeraceae	Rhizophilic guild	0.347398	-0.180983	0.006978	0.255208	0.0318544	-0.0490938	0.0120545
79	191	Arbuscular mycorrhizal fungi reduce development of pea root-rot caused by Aphanomyces euteiches using oospores as pathogen inoculum	2004	<1	Sandy			Pisum sativum	Fabaceae	Taproot	Annual	33	5	43	1	Claroideoglomus claroideum	Claroideoglomeraceae	Rhizophilic guild	0.347398	-0.00209023	0.00941061	0.248069	0.0286663	0.0686314	0.0129709
80	192	Arbuscular mycorrhizal fungus causes increased condensed tannins concentrations in shoots but decreased in roots of Lotus japonicus L.	2017	<1	Sandy	No_P_deficient		Lotus japonicus	Fabaceae	Fibrous	Perennial	63	3	79	1	Glomus sp.	Glomeraceae	Rhizophilic guild	1.67857	1.06224	0.00666667	0.580669	0.00666667	0.788457	0.00666667
81	193	Arbuscular mycorrhizal fungus on the initial growth and nutrition of Coffea arabica L. genotypes	2019	>2.9	Sandy	No_P_deficient	Acidic	Coffea arabica	Other	Taproot	Perennial	300	6		1	Rhizophagus clarus	Glomeraceae	Rhizophilic guild	0.299877	0.48878	0.0111049	0.909523	0.0632482	0.602712	0.0213376
82	194	Arbuscular Mycorrhizal Fungus Improves Rhizobium–Glycyrrhiza Seedling Symbiosis under Drought Stress	2019	<1	Sandy	P_deficent	Neutral	Glycyrrhiza uralensis	Fabaceae	Taproot	Perennial	126	4	43.4	1	Rhizophagus irregularis	Glomeraceae	Rhizophilic guild	1.36579	1.23922	0.00326887	0.894128	0.00486556	1.05471	0.004123
83	195	Arbuscular mycorrhizal inoculation increases molybdenum accumulation but decreases molybdenum toxicity in maize plants grown in polluted soil	2018	>2.9	No_sandy		Alkaline	Zea mays	Poaceae	Fibrous	Annual	28	4	76	1	Claroideoglomus etunicatum	Claroideoglomeraceae	Rhizophilic guild	0.292171	0.693775	0.0137327	0.712804	0.037529	0.69811	0.0173552
84	196	Arbuscular mycorrhizal strategy for zinc mycoremediation and diminished translocation to shoots and grains in wheat	2017	>2.9	No_sandy			Triticum aestivum	Poaceae	Fibrous	Annual	45	5	36	1	Funneliformis geosporum	Glomeraceae	Rhizophilic guild	0.135333	0.160646	0.0368932	0.427819	0.0597113	0.196502	0.0393329
85	197	Arbuscular mycorrhizal symbiosis alleviates drought stress imposed on wheat plants (Triticum aestivum L.)	2019	>2.9	Sandy			Triticum aestivum	Poaceae	Fibrous	Annual	90	3	48	>1	Mixed	Mixed	Mixed	0.0909091	0.180537	0.0131716	0.162519	0.0411419	0.179048	0.0148968
86	198	Arbuscular Mycorrhizal Symbiosis Alleviates Salt Stress in Black Locust through Improved Photosynthesis, Water Status, and K + /Na + Homeostasis	2017	<1	Sandy	No_P_deficient	Alkaline	Robinia pseudoacacia	Fabaceae	Taproot	Perennial	70	30	91	1	Rhizophagus irregularis	Glomeraceae	Rhizophilic guild	0.345279	0.519853	0.0301688	0.488573	0.0861783	0.511918	0.0416183
87	199	Arbuscular mycorrhizal symbiosis can mitigate the negative effects of night warming on physiological traits of Medicago truncatula L	2015	>2.9	No_sandy	P_deficent	Alkaline	Medicago truncatula	Fabaceae	Taproot	Perennial	58	4	64	1	Rhizophagus irregularis	Glomeraceae	Rhizophilic guild	0.1	0.226038	0.0243857	0.352821	0.035356	0.237608	0.0252429
88	200	Arbuscular mycorrhizal symbiosis enhanced growth and antioxidant metabolism in date palm subjected to long-term drought	2015	<1	Sandy	P_deficent	Alkaline	Phoenix dactylifera	Other	Fibrous	Perennial	140	5	54.3	1	Funneliformis mosseae	Glomeraceae	Rhizophilic guild	0.654255	0.320386	0.004	0.15066	0.004	0.256659	0.004
88	201	Arbuscular mycorrhizal symbiosis enhanced growth and antioxidant metabolism in date palm subjected to long-term drought	2015	<1	Sandy	P_deficent	Alkaline	Phoenix dactylifera	Other	Fibrous	Perennial	140	5	61.43	1	Rhizophagus intraradices	Glomeraceae	Rhizophilic guild	0.654255	0.54892	0.004	0.317714	0.004	0.463754	0.004
89	202	Arbuscular mycorrhizal symbiosis improves growth and root nutrient status of citrus subjected to salt stress	2009	>2.9				Citrus tangerine	Rutaceae	Taproot	Perennial	85	3	69.93	1	Funneliformis mosseae	Glomeraceae	Rhizophilic guild	0.6	0.215111	0.00666667	0.182322	0.00666667	0.202941	0.00666667
89	203	Arbuscular mycorrhizal symbiosis improves growth and root nutrient status of citrus subjected to salt stress	2009	>2.9				Citrus tangerine	Rutaceae	Taproot	Perennial	85	3	72.33	1	Paraglomus occultum	Paraglomeraceae	Rhizophilic guild	0.6	0.24686	0.00666667	0.236389	0.00666667	0.242946	0.00666667
90	204	Arbuscular mycorrhizal symbiosis increases the content of volatile terpenes and plant performance in Satureja macrostema (Benth.) Briq.	2015	1_2.9	No_sandy		Acidic	Satureja macrostema	Other	Taproot	Perennial	90	7	80	1	Rhizophagus irregularis	Glomeraceae	Rhizophilic guild	0.642857	0.786833	0.00285714	0.510826	0.00285714	0.687698	0.00285714
91	205	Arbuscular mycorrhizal symbiosis influences arsenic accumulation and speciation in Medicago truncatula L. in arsenic-contaminated soil	2015	1_2.9	Sandy	No_P_deficient	Alkaline	Medicago truncatula	Fabaceae	Taproot	Perennial	102	4	66	1	Rhizophagus irregularis	Glomeraceae	Rhizophilic guild	0.29459	2.47356	0.0364251	1.62473	0.0759361	2.33409	0.0441143
92	206	Arbuscular mycorrhizal symbiosis is accompanied by local and systemic alterations in gene expression and an increase in disease resistance in the shoots	2007	1_2.9				Medicago truncatula	Fabaceae	Taproot	Perennial	44	3	43.3333	1	Gigaspora gigantea	Gigasporaceae	Edaphophilic guild	1.61538	0	0.0197239	0.105361	0.0215873	0.0663751	0.019704
92	207	Arbuscular mycorrhizal symbiosis is accompanied by local and systemic alterations in gene expression and an increase in disease resistance in the shoots	2007	1_2.9				Medicago truncatula	Fabaceae	Taproot	Perennial	44	3	50.6667	1	Rhizophagus intraradices	Glomeraceae	Rhizophilic guild	3.02475	0.155564	0.00833199	-0.0248563	0.00734525	0.0231013	0.00760997
93	208	Arbuscular mycorrhizal symbiosis mitigates the negative effects of salinity on durum wheat	2017	1_2.9	No_sandy		Alkaline	Triticum durum	Poaceae	Fibrous	Annual	45	7	36.4	>1	Mixed	Mixed	Mixed	0.995349	0.0184337	0.00285714	0.0850624	0.00285714	0.0522253	0.00285714
94	209	Arbuscular mycorrhizal symbiosis modifies the effects of a nitric oxide donor (sodium nitroprusside;SNP) and a nitric oxide synthesis inhibitor (N ω -nitro-L-arginine methyl ester;L-NAME) on lettuce plants under well watered and drought conditions	2017	<1	Sandy		Alkaline	Lactuca sativa	Asteraceae	Taproot	Annual	91	5	18	1	Rhizophagus irregularis	Glomeraceae	Rhizophilic guild	0.498843	0.0560853	0.00892201	0.0208028	0.0557527	0.0444803	0.0196535
95	210	Arbuscular mycorrhizal wheat inoculation promotes alkane and polycyclic aromatic hydrocarbon biodegradation: Microcosm experiment on aged-contaminated soil	2016	<1	No_sandy	No_P_deficient	Alkaline	Triticum durum	Poaceae	Fibrous	Annual	102	3	9	1	Rhizophagus irregularis	Glomeraceae	Rhizophilic guild	0.0784109	0.15825	0.000113204	-0.0188431	0.0168814	0.146379	0.000322782
96	211	ArbuscularmycorrhizasandZnfertilizationmodifygrowthandphysiologicalbehaviorofapricot(PrunusarmeniacaL.)	2013	>2.9	Sandy	No_P_deficient	Neutral	Prunus armeniaca	Other	Taproot	Perennial	180	3	41	1	Rhizophagus fasciculatus	Glomeraceae	Rhizophilic guild	0.351523	0.611888	0.00666667	0.469552	0.00666667	0.576772	0.00666667
96	212	ArbuscularmycorrhizasandZnfertilizationmodifygrowthandphysiologicalbehaviorofapricot(PrunusarmeniacaL.)	2013	>2.9	Sandy	No_P_deficient	Neutral	Prunus armeniaca	Other	Taproot	Perennial	180	3	53	1	Funneliformis mosseae	Glomeraceae	Rhizophilic guild	0.351523	0.643722	0.00666667	0.733825	0.00666667	0.66795	0.00666667
96	213	ArbuscularmycorrhizasandZnfertilizationmodifygrowthandphysiologicalbehaviorofapricot(PrunusarmeniacaL.)	2013	>2.9	Sandy	No_P_deficient	Neutral	Prunus armeniaca	Other	Taproot	Perennial	180	3	52	1	Glomus macrocarpum	Glomeraceae	Rhizophilic guild	0.351523	0.625558	0.00666667	0.667552	0.00666667	0.636651	0.00666667
96	214	ArbuscularmycorrhizasandZnfertilizationmodifygrowthandphysiologicalbehaviorofapricot(PrunusarmeniacaL.)	2013	>2.9	Sandy	No_P_deficient	Neutral	Prunus armeniaca	Other	Taproot	Perennial	180	3	37	1	Sclerocystis dussii	Glomeraceae	Rhizophilic guild	0.351523	0.471747	0.00666667	0.342129	0.00666667	0.439617	0.00666667
97	215	Arbuscular mycorrhizas improve plant growth and soil structure in trifoliate orange under salt stress	2016	>2.9				Poncirus trifoliata	Rutaceae	Taproot	Perennial	170	3	77	1	Diversispora versiformis	Diversisporaceae	Edaphophilic guild	0.901408	0.700165	0.0257545	0.151916	0.00237744	0.476924	0.012317
98	216	Arsenic Accumulation and Speciation in Maize as Affected by Inoculation with Arbuscular Mycorrhizal Fungus Glomus mosseae	2009	<1	Sandy	P_deficent	Alkaline	Zea mays	Poaceae	Fibrous	Annual	56	4	74	1	Funneliformis mosseae	Glomeraceae	Rhizophilic guild	1.76744	0.13062	0.00428927	0.233615	0.0079688	0.19761	0.00579077
99	217	Arsenite transporters expression in rice (Oryza sativa L.) associated with arbuscular mycorrhizal fungi (AMF) colonization under different levels of arsenite stress	2012	>2.9	No_sandy		Acidic	Oryza sativa	Poaceae	Fibrous	Annual	60	4	58	1	Rhizophagus intraradices	Glomeraceae	Rhizophilic guild	0.259394	0.322211	0.0248127	0.41756	0.0250867	0.342607	0.0246147
100	218	Artificial infection by endophytes affects growth and mycorrhizal colonisation of Lolium perenne	2003	<1	Sandy			Lolium perenne	Poaceae	Fibrous	Perennial	70	5	49	1	Sclerocystis sp	Glomeraceae	Rhizophilic guild	1.88251	-0.0730251	0.0344434	-0.113132	0.0591426	-0.099035	0.0332664
100	219	Artificial infection by endophytes affects growth and mycorrhizal colonisation of Lolium perenne	2003	<1	Sandy			Lolium perenne	Poaceae	Fibrous	Perennial	70	5	44	1	Sclerocystis sp	Glomeraceae	Rhizophilic guild	2.90476	-0.248896	0.0913221	-0.972036	0.0780676	-0.731687	0.0841478
101	220	Atmospheric CO2 and mycorrhiza effects on biomass allocation and nutrient uptake of nodulated pea (Pisum sativum L.) plants	2000	>2.9	Sandy	No_P_deficient		Pisum sativum	Fabaceae	Taproot	Annual	63	5	62	1	Funneliformis caledonium	Glomeraceae	Rhizophilic guild	0.156692	0.1808	0.00154196	-0.0338962	0.00407817	0.154278	0.0017886
102	221	Attenuation of cadmium toxicity in mycorrhizal celery (Apium graveolens L.)	2007	1_2.9	No_sandy	No_P_deficient	Alkaline	Apium graveolens	Other	Taproot	Annual	60	5	75	1	Glomus macrocarpum	Glomeraceae	Rhizophilic guild	0.703666	0.227813	0.004	0.0772048	0.004	0.16833	0.004
103	222	Auxin interaction with the vesicular-arbuscular mycorrhizal fungus Glomus intraradices Schenck & Smith improves vegetative growth of two citrus rootstocks	1996		Sandy			Citrus sinensis	Rutaceae	Taproot	Perennial	330	5	68.3	1	Rhizophagus intraradices	Glomeraceae	Rhizophilic guild	0.509934	0.329828	0.004	0.188794	0.004	0.284387	0.004
104	223	Behavior of mercury in a soil – plant system as affected by inoculation with the arbuscular mycorrhizal fungus Glomus mosseae	2010	<1	Sandy	P_deficent	Alkaline	Zea mays	Poaceae	Fibrous	Annual	56	3	77	1	Funneliformis mosseae	Glomeraceae	Rhizophilic guild	0.571429	0.0606246	0.00120958	-0.0645385	0.00247504	0.0169018	0.00129678
105	224	Behaviour of arbuscular-mycorrhizal fungi on Vigna luteola growth and its effect on the exchangeable ( 32 P) phosphorus of soil	2000	<1	Sandy	P_deficent	Acidic	Vigna luteola	Fabaceae	Taproot	Annual	21	5	24.5	1	Scutellospora fulgida	Gigasporaceae	Edaphophilic guild	1.0203	0.0827723	0.0122262	-0.127155	0.00708166	-0.0177444	0.00967357
105	225	Behaviour of arbuscular-mycorrhizal fungi on Vigna luteola growth and its effect on the exchangeable ( 32 P) phosphorus of soil	2000	<1	Sandy	P_deficent	Acidic	Vigna luteola	Fabaceae	Taproot	Annual	21	5	18.6	1	Funneliformis mosseae	Glomeraceae	Rhizophilic guild	1.0203	0.462999	0.00655549	-0.0125158	0.0155711	0.250896	0.00920331
105	226	Behaviour of arbuscular-mycorrhizal fungi on Vigna luteola growth and its effect on the exchangeable ( 32 P) phosphorus of soil	2000	<1	Sandy	P_deficent	Acidic	Vigna luteola	Fabaceae	Taproot	Annual	21	5	35.3	>1	Mixed	Mixed	Mixed	1.0203	0.141746	0.00489364	0.0834811	0.0146308	0.112745	0.0085277
106	227	Belowground Inoculation With Arbuscular Mycorrhizal Fungi Increases Local and Systemic Susceptibility of Rice Plants to Different Pest Organisms	2018	1_2.9	No_sandy			Oryza sativa	Poaceae	Fibrous	Annual	28	12	13.6	>1	Mixed	Mixed	Mixed	0.579545	0.214011	0.00625835	0.162519	0.0182853	0.195425	0.00976389
107	228	Below-ground interactions between a seedling soybean and pre- established soybean plant with and without mycorrhizal fungi. 1. Plant biomass, root growth, and mycorrhizal colonization	1994	>2.9	Sandy			Glycine max	Fabaceae	Taproot	Annual	73	5	47.4	1	Funneliformis mosseae	Glomeraceae	Rhizophilic guild	0.365155	-0.0095924	0.004	0.211309	0.004	0.0544352	0.004
108	229	Bene?cial effect of saprobe and arbuscular mycorrhizal fungi on growth of Eucalyptus globulus co-cultured with Glycine max in soil contaminated with heavy metals	2007	1_2.9	Sandy		Acidic	Eucalyptus globulus	Other	Taproot	Perennial	102	5	40	1	Funneliformis mosseae	Glomeraceae	Rhizophilic guild	0.265625	0.117783	0.004	-0.218254	0.004	0.0560146	0.004
108	230	Bene?cial effect of saprobe and arbuscular mycorrhizal fungi on growth of Eucalyptus globulus co-cultured with Glycine max in soil contaminated with heavy metals	2007	1_2.9	Sandy		Acidic	Eucalyptus globulus	Other	Taproot	Perennial	102	5	50	1	Glomus deserticola	Glomeraceae	Rhizophilic guild	0.265625	0.189242	0.004	-0.170626	0.004	0.12371	0.004
109	231	Beneficial effects of indigenous Cd-tolerant and Cd-sensitive Glomus mosseae associated with a Cd-adapted strain of Brevibacillus sp. in improving plant tolerance to Cd contamination	2003	<1	No_sandy	P_deficent	Neutral	Trifolium repens	Fabaceae	Fibrous	Perennial	90	5	64	1	Funneliformis mosseae	Glomeraceae	Rhizophilic guild	0.490202	1.00203	0.0120566	0.959198	0.0505271	0.98814	0.0216699
110	232	Beneficial Root Endophytic Fungi Increase Growth and Quality Parameters of Sweet Basil in Heavy Metal Contaminated Soil	2018	>2.9	Sandy			Ocimum basilicum	Other	Taproot	Annual	35	9	60	1	Rhizophagus irregularis	Glomeraceae	Rhizophilic guild	0.315516	0.557541	0.00994574	0.977225	0.0256274	0.675389	0.0133447
111	233	Benefit, cost and water-use efficiency of arbuscular mycorrhizal durum wheat grown under drought stress	1998	>2.9	No_sandy	P_deficent	Alkaline	Triticum durum	Poaceae	Fibrous	Annual	55	4	52	1	Glomus monosporum	Glomeraceae	Rhizophilic guild	0.439759	0.164425	0.005	0.311372	0.005	0.211641	0.005
111	234	Benefit, cost and water-use efficiency of arbuscular mycorrhizal durum wheat grown under drought stress	1998	>2.9	No_sandy	P_deficent	Alkaline	Triticum durum	Poaceae	Fibrous	Annual	55	4	38	1	Glomus monosporum	Glomeraceae	Rhizophilic guild	0.617521	0.0839797	0.005	0.281608	0.005	0.164103	0.005
112	235	BIO-CONTROL CHARACTERIZATION OF TWO ENDO-MYCORRHIZAL FUNGI AGAINST VERTICILLIUM WILT OF CUCUMBER	2019	>2.9	No_sandy		Neutral	Capsicum annuum	Solanaceae	Fibrous	Annual	70	4	70	1	Funneliformis mosseae	Glomeraceae	Rhizophilic guild	1.34884	0.428455	0.005	0.113944	0.005	0.260077	0.005
112	236	BIO-CONTROL CHARACTERIZATION OF TWO ENDO-MYCORRHIZAL FUNGI AGAINST VERTICILLIUM WILT OF CUCUMBER	2019	>2.9	No_sandy		Neutral	Capsicum annuum	Solanaceae	Fibrous	Annual	70	4	85	1	Rhizophagus fasciculatus	Glomeraceae	Rhizophilic guild	1.34884	0.582605	0.005	0.202237	0.005	0.382092	0.005
113	237	Biological control of tobacco bacterial wilt using Trichoderma harzianum amended bioorganic fertilizer and the arbuscular mycorrhizal fungi Glomus mosseae	2016	>2.9	No_sandy	P_deficent	Neutral	Nicotiana tabacum	Solanaceae	Fibrous	Annual	60	15	65.27	1	Funneliformis mosseae	Glomeraceae	Rhizophilic guild	0.526316	0.328925	0.0256702	0.29267	0.0336196	0.316571	0.0282728
114	238	Brassinosteroide (BR) and Arbuscular Mycorrhizal (AM) Fungi Alleviate Salinity in Wheat	2017	>2.9	No_sandy			Triticum aestivum	Poaceae	Fibrous	Annual	36	4	61	1	Funneliformis mosseae	Glomeraceae	Rhizophilic guild	0.214815	0.798508	0.005	0.727049	0.005	0.786238	0.005
115	239	Cadmium accumulation and buffering of cadmium-induced stress by arbuscular mycorrhiza in three Pisum sativum L	2002	<1	Sandy	No_P_deficient	Alkaline	Pisum sativum	Fabaceae	Taproot	Annual	42	5	52	1	Rhizophagus intraradices	Glomeraceae	Rhizophilic guild	0.528846	0.117783	0.004	0.0357181	0.004	0.0901511	0.004
115	240	Cadmium accumulation and buffering of cadmium-induced stress by arbuscular mycorrhiza in three Pisum sativum L	2002	<1	Sandy	No_P_deficient	Alkaline	Pisum sativum	Fabaceae	Taproot	Annual	42	5	41	1	Rhizophagus intraradices	Glomeraceae	Rhizophilic guild	0.60396	-0.0404095	0.004	-0.0678226	0.004	-0.0506437	0.004
115	241	Cadmium accumulation and buffering of cadmium-induced stress by arbuscular mycorrhiza in three Pisum sativum L	2002	<1	Sandy	No_P_deficient	Alkaline	Pisum sativum	Fabaceae	Taproot	Annual	42	5	30	1	Rhizophagus intraradices	Glomeraceae	Rhizophilic guild	1.05128	-0.0526437	0.004	0.0706176	0.004	0.0124225	0.004
116	242	Calcium and Calmodulin Involve in Mycorrhizal and Root Development in Trifoliate Orange Colonized by Rhizophagus intraradices	2014	>2.9	No_sandy			Poncirus trifoliata	Rutaceae	Taproot	Perennial	112	3	32.05	1	Rhizophagus intraradices	Glomeraceae	Rhizophilic guild	0.348837	0.140773	0.00649998	0.360003	0.00660778	0.202237	0.0065416
117	243	Can arbuscular mycorrhizal fungi reduce Cd uptake and alleviate Cd toxicity of Lonicera japonica grown in Cd-added soils?	2016	1_2.9	No_sandy	No_P_deficient	Neutral	Lonicera japonica	Other	Taproot	Perennial	120	5	91	1	Diversispora versiformis	Diversisporaceae	Edaphophilic guild	0.490136	1.69339	0.0601604	1.92548	0.100701	1.77583	0.0695913
117	244	Can arbuscular mycorrhizal fungi reduce Cd uptake and alleviate Cd toxicity of Lonicera japonica grown in Cd-added soils?	2016	1_2.9	No_sandy	No_P_deficient	Neutral	Lonicera japonica	Other	Taproot	Perennial	120	5	96	1	Rhizophagus intraradices	Glomeraceae	Rhizophilic guild	0.490136	1.97106	0.0572974	1.98726	0.109738	1.97642	0.0716379
118	245	Can mycorrhizal inoculation stimulate the growth and flowering of peat-grown ornamental plants under standard or reduced watering?	2014	<1	Sandy	No_P_deficient	Acidic	Capsicum annuum	Solanaceae	Fibrous	Annual	196	10	19.9307	>1	Mixed	Mixed	Mixed	0.0914894	-0.065958	0.0120943	0.246133	0.0205542	-0.0357181	0.0128258
118	246	Can mycorrhizal inoculation stimulate the growth and flowering of peat-grown ornamental plants under standard or reduced watering?	2014	<1	Sandy	No_P_deficient	Acidic	Dimorphotheca sinuata	Asteraceae	Taproot	Perennial	196	10	61.5514	>1	Mixed	Mixed	Mixed	0.0317073	0.429563	0.0351862	0.730888	0.0456165	0.440312	0.0355389
118	247	Can mycorrhizal inoculation stimulate the growth and flowering of peat-grown ornamental plants under standard or reduced watering?	2014	<1	Sandy	No_P_deficient	Acidic	Gazania rigens	Asteraceae	Taproot	Perennial	196	10	41.7551	>1	Mixed	Mixed	Mixed	0.171053	0.223144	0.0103626	0.0451204	0.0227848	0.199035	0.0115736
118	248	Can mycorrhizal inoculation stimulate the growth and flowering of peat-grown ornamental plants under standard or reduced watering?	2014	<1	Sandy	No_P_deficient	Acidic	Impatiens hawkerii	Other	Fibrous	Perennial	196	10	62.2818	>1	Mixed	Mixed	Mixed	0.0625	0.223144	0.0184028	0.757686	0.0421918	0.263871	0.0199719
118	249	Can mycorrhizal inoculation stimulate the growth and flowering of peat-grown ornamental plants under standard or reduced watering?	2014	<1	Sandy	No_P_deficient	Acidic	Pelargonium peltatum	Other	Taproot	Perennial	196	10	67.5616	>1	Mixed	Mixed	Mixed	0.4375	0.628609	0.0460062	0.451985	0.0641457	0.578078	0.0506928
118	250	Can mycorrhizal inoculation stimulate the growth and flowering of peat-grown ornamental plants under standard or reduced watering?	2014	<1	Sandy	No_P_deficient	Acidic	Pelargonium zonale	Other	Taproot	Perennial	196	10	22.1617	>1	Mixed	Mixed	Mixed	0.182609	-0.0909718	0.0583399	-0.100083	0.0720991	-0.0923733	0.0602955
118	251	Can mycorrhizal inoculation stimulate the growth and flowering of peat-grown ornamental plants under standard or reduced watering?	2014	<1	Sandy	No_P_deficient	Acidic	Sanvitalia procumbens	Asteraceae	Taproot	Annual	196	10	17.1487	>1	Mixed	Mixed	Mixed	0.268966	0	0.0275862	0.334639	4.66807	0.0808785	0.474963
118	252	Can mycorrhizal inoculation stimulate the growth and flowering of peat-grown ornamental plants under standard or reduced watering?	2014	<1	Sandy	No_P_deficient	Acidic	Verbena hybrida	Other	Fibrous	Perennial	196	10	28.8383	>1	Mixed	Mixed	Mixed	0.0883721	0.190044	0.0151156	0.405465	0.0498615	0.209374	0.0170822
119	253	Carbon allocation in mycelia of arbuscular mycorrhizal fungi during colonisation of plant seedlings	2007	<1	Sandy	No_P_deficient	Neutral	Plantago lanceolata	Other	Fibrous	Perennial	57	12	52	1	Rhizophagus intraradices	Glomeraceae	Rhizophilic guild	0.189474	0.64462	0.00166667	0.367725	0.00166667	0.605331	0.00166667
119	254	Carbon allocation in mycelia of arbuscular mycorrhizal fungi during colonisation of plant seedlings	2007	<1	Sandy	No_P_deficient	Neutral	Trifolium subterraneum	Fabaceae	Fibrous	Perennial	57	12	40	1	Rhizophagus intraradices	Glomeraceae	Rhizophilic guild	0.40566	0.743733	0.00166667	0.633249	0.00166667	0.713081	0.00166667
120	255	Changes in free amino acid concentrations in mycorrhizal strawberry plants	2009	1_2.9			Acidic	Fragaria ananassa	Other	Fibrous	Perennial	70	6	32	1	Funneliformis mosseae	Glomeraceae	Rhizophilic guild	0.47048	1.12732	0.213653	0.876399	0.0618954	1.05367	0.155705
120	256	Changes in free amino acid concentrations in mycorrhizal strawberry plants	2009	1_2.9			Acidic	Fragaria ananassa	Other	Fibrous	Perennial	70	6	23	1	Glomus aggregatum	Glomeraceae	Rhizophilic guild	0.47048	1.06082	0.265269	0.686164	0.125811	0.955485	0.219257
121	257	Changes in root morphology accompanying mycorrhizal alleviation of phosphorus de?ciency in micropropagated Annona cherimola Mill. plants	2005	<1	Sandy			Annona cherimola	Other	Taproot	Perennial	120	20	58.8464	1	Rhizophagus intraradices	Glomeraceae	Rhizophilic guild	0.51102	1.58894	0.001	1.1007	0.001	1.44894	0.001
122	258	Changes in soil solution Zn and pH and uptake of Zn by arbuscular mycorrhizal red clover in Zn-contaminated soil	2001	<1	Sandy	No_P_deficient	Acidic	Trifolium pratense	Fabaceae	Fibrous	Perennial	62	5	28.9	1	Funneliformis mosseae	Glomeraceae	Rhizophilic guild	0.161818	-0.0560895	0.004	-0.10661	0.004	-0.0629748	0.004
123	259	Characterisation of arbuscular mycorrhizal fungi colonisation in cluster roots of Hakea verrucosa F. Muell (Proteaceae), and its effect on growth and nutrient acquisition in ultramafic soil	2005		Sandy	P_deficent	Acidic	Hakea verrucosa	Other	Taproot	Perennial	56	3	20	>1	Mixed	Mixed	Mixed	0.523046	-0.152853	0.00259426	-0.0357058	0.00316632	-0.111057	0.00269953
124	260	Characterisation of growth and biochemical response of Onopordum acanthium L. under lead stress as affected by microbial inoculation	2017	>2.9	No_sandy		Alkaline	Onopordum acanthium	Asteraceae	Taproot	Annual	120	3	62	>1	Mixed	Mixed	Mixed	0.313889	0.262364	0.0027833	0.454396	0.0140634	0.311704	0.00489344
125	261	Characteristic responses of three tropical legumes to the inoculation of two species of VAM fungi in Andosol soils with different fertilities	1996	1_2.9	No_sandy	No_P_deficient	Acidic	Arachis hypogaea	Fabaceae	Taproot	Annual	84	3	44	1	Glomus sp.	Glomeraceae	Rhizophilic guild	0.508296	2.37447	0.00666667	1.7883	0.00666667	2.21257	0.00666667
125	262	Characteristic responses of three tropical legumes to the inoculation of two species of VAM fungi in Andosol soils with different fertilities	1997	1_2.9	No_sandy	No_P_deficient	Acidic	Arachis hypogaea	Fabaceae	Taproot	Annual	84	3	39	1	Gigaspora margarita	Gigasporaceae	Edaphophilic guild	0.508296	2.10941	0.00666667	1.58532	0.00666667	1.96153	0.00666667
125	263	Characteristic responses of three tropical legumes to the inoculation of two species of VAM fungi in Andosol soils with different fertilities	1994	1_2.9	No_sandy	No_P_deficient	Acidic	Cajanus cajan	Fabaceae	Taproot	Perennial	73	3	64.5	1	Glomus sp.	Glomeraceae	Rhizophilic guild	0.206074	1.33825	0.00666667	0.706219	0.00666667	1.25482	0.00666667
125	264	Characteristic responses of three tropical legumes to the inoculation of two species of VAM fungi in Andosol soils with different fertilities	1995	1_2.9	No_sandy	No_P_deficient	Acidic	Cajanus cajan	Fabaceae	Taproot	Perennial	73	3	72.5	1	Gigaspora margarita	Gigasporaceae	Edaphophilic guild	0.206074	0.957512	0.00666667	0.536801	0.00666667	0.897042	0.00666667
125	265	Characteristic responses of three tropical legumes to the inoculation of two species of VAM fungi in Andosol soils with different fertilities	1998	1_2.9	No_sandy	No_P_deficient	Acidic	Vigna unguiculata	Fabaceae	Taproot	Annual	91	3	52	1	Glomus sp.	Glomeraceae	Rhizophilic guild	0.446844	0.89276	0.00666667	0.246899	0.00666667	0.733831	0.00666667
125	266	Characteristic responses of three tropical legumes to the inoculation of two species of VAM fungi in Andosol soils with different fertilities	1999	1_2.9	No_sandy	No_P_deficient	Acidic	Vigna unguiculata	Fabaceae	Taproot	Annual	91	3	57.5	1	Gigaspora margarita	Gigasporaceae	Edaphophilic guild	0.446844	0.674988	0.00666667	0.18706	0.00666667	0.548013	0.00666667
126	267	Characterization of six PHT1 members in Lycium barbarum and their response to arbuscular mycorrhiza and water stress	2017	<1	Sandy			Lycium barbarum	Solanaceae	Taproot	Perennial	40	6	34	1	Rhizophagus irregularis	Glomeraceae	Rhizophilic guild	0.293132	0.671987	0.0161243	0.732368	0.0292235	0.685997	0.0180251
127	268	Chromium resistance of dandelion (Taraxacum platypecidum diels.) and bermudagrass (Cynodon dactylon [Linn.] Pers.) is enhanced by arbuscular mycorrhiza in Cr(VI)-contaminated soils	2014	<1	Sandy	P_deficent	Alkaline	Cynodon dactylon	Poaceae	Fibrous	Perennial	80	4	32.3	1	Rhizophagus irregularis	Glomeraceae	Rhizophilic guild	0.229229	0.515249	0.159438	0.818311	0.407375	0.579175	0.19524
127	269	Chromium resistance of dandelion (Taraxacum platypecidum diels.) and bermudagrass (Cynodon dactylon [Linn.] Pers.) is enhanced by arbuscular mycorrhiza in Cr(VI)-contaminated soils	2014	<1	Sandy	P_deficent	Alkaline	Taraxacum platypecidum	Asteraceae	Taproot	Annual	80	4	75.7	1	Rhizophagus irregularis	Glomeraceae	Rhizophilic guild	0.924906	1.62126	0.356268	1.64013	0.315412	1.63037	0.33528
128	270	CO 2 ENRICHMENT AND MYCORRHIZAL EFFECTS ON CUTTING GROWTH AND SOME PHYSIOLOGICAL TRAITS OF CUTTINGS DURING ROOTING	2013	>2.9	Sandy		Acidic	Osteospermum ecklonis	Asteraceae	Fibrous	Perennial	56	20	31	>1	Mixed	Mixed	Mixed	0.0882353	0.187212	0.001	0.287682	0.001	0.195745	0.001
128	271	CO 2 ENRICHMENT AND MYCORRHIZAL EFFECTS ON CUTTING GROWTH AND SOME PHYSIOLOGICAL TRAITS OF CUTTINGS DURING ROOTING	2013	>2.9	Sandy		Acidic	Pelargonium hortorum	Other	Taproot	Perennial	35	20	49.2	>1	Mixed	Mixed	Mixed	0.0629921	-0.099255	0.001	0.223144	0.001	-0.076961	0.001
129	272	Co-inoculation of Arizona cypress with arbuscular mycorrhiza fungi and Pseudomonas fluorescens under fuel pollution	2019	>2.9	No_sandy	P_deficent	Alkaline	Cupressus arizonica	Other	Taproot	Perennial	180	9	35	1	Rhizophagus irregularis	Glomeraceae	Rhizophilic guild	1.03261	0.10073	0.00222222	0.169076	0.00222222	0.136035	0.00222222
129	273	Co-inoculation of Arizona cypress with arbuscular mycorrhiza fungi and Pseudomonas fluorescens under fuel pollution	2019	>2.9	No_sandy	P_deficent	Alkaline	Cupressus arizonica	Other	Taproot	Perennial	180	9	44	1	Funneliformis mosseae	Glomeraceae	Rhizophilic guild	1.03261	-0.00818559	0.00222222	0.0832763	0.00222222	0.0393235	0.00222222
129	274	Co-inoculation of Arizona cypress with arbuscular mycorrhiza fungi and Pseudomonas fluorescens under fuel pollution	2019	>2.9	No_sandy	P_deficent	Alkaline	Cupressus arizonica	Other	Taproot	Perennial	180	9	46	>1	Mixed	Glomeraceae	Rhizophilic guild	1.03261	0.141651	0.00222222	0.184512	0.00222222	0.163655	0.00222222
130	275	Co-inoculation of Glomus intraradices and Trichoderma atroviride acts as a biostimulant to promote growth, yield and nutrient uptake of vegetable crops	2014	<1	Sandy			Capsicum annuum	Solanaceae	Fibrous	Annual	35	4	31.7	1	Rhizophagus intraradices	Glomeraceae	Rhizophilic guild	0.222222	0.764606	0.005	0.847298	0.005	0.780159	0.005
130	276	Co-inoculation of Glomus intraradices and Trichoderma atroviride acts as a biostimulant to promote growth, yield and nutrient uptake of vegetable crops	2014	<1	Sandy			Cucumis melo	Other	Taproot	Annual	35	4	32.1	1	Rhizophagus intraradices	Glomeraceae	Rhizophilic guild	0.173333	0.444686	0.005	0.207639	0.005	0.413012	0.005
130	277	Co-inoculation of Glomus intraradices and Trichoderma atroviride acts as a biostimulant to promote growth, yield and nutrient uptake of vegetable crops	2014	<1	Sandy			Cucurbita pepo	Other	Fibrous	Annual	35	4	27.3	1	Rhizophagus intraradices	Glomeraceae	Rhizophilic guild	0.155556	0.456017	0.005	0.356675	0.005	0.443205	0.005
130	278	Co-inoculation of Glomus intraradices and Trichoderma atroviride acts as a biostimulant to promote growth, yield and nutrient uptake of vegetable crops	2014	<1	Sandy			Cucurbita pepo	Other	Fibrous	Annual	21	4		1	Rhizophagus intraradices	Glomeraceae	Rhizophilic guild	0.15625	0.17185	0.005	0.287682	0.005	0.18831	0.005
130	279	Co-inoculation of Glomus intraradices and Trichoderma atroviride acts as a biostimulant to promote growth, yield and nutrient uptake of vegetable crops	2014	<1	Sandy			Lactuca sativa	Asteraceae	Taproot	Annual	35	4	30.2	1	Rhizophagus intraradices	Glomeraceae	Rhizophilic guild	0.222222	0.980829	0.005	0.81093	0.005	0.952009	0.005
130	280	Co-inoculation of Glomus intraradices and Trichoderma atroviride acts as a biostimulant to promote growth, yield and nutrient uptake of vegetable crops	2014	<1	Sandy			Lactuca sativa	Asteraceae	Taproot	Annual	21	4		1	Rhizophagus intraradices	Glomeraceae	Rhizophilic guild	0.261261	0.158004	0.005	0.188052	0.005	0.164303	0.005
130	281	Co-inoculation of Glomus intraradices and Trichoderma atroviride acts as a biostimulant to promote growth, yield and nutrient uptake of vegetable crops	2014	<1	Sandy			Solanum lycopersicum	Solanaceae	Fibrous	Annual	35	4	35	1	Rhizophagus intraradices	Glomeraceae	Rhizophilic guild	0.173333	0.518794	0.005	0.730888	0.005	0.553101	0.005
130	282	Co-inoculation of Glomus intraradices and Trichoderma atroviride acts as a biostimulant to promote growth, yield and nutrient uptake of vegetable crops	2014	<1	Sandy			Solanum lycopersicum	Solanaceae	Fibrous	Annual	21	4		1	Rhizophagus intraradices	Glomeraceae	Rhizophilic guild	0.209302	0.397683	0.005	0.200671	0.005	0.366244	0.005
131	283	Cold-storage of mixed inoculum of Glomus intraradices enhances root colonization, phosphorus status and growth of hot pepper	2002	<1	Sandy			Capsicum annuum	Solanaceae	Fibrous	Annual	98	3	42.5	1	Rhizophagus intraradices	Glomeraceae	Rhizophilic guild	0.388112	0.273597	0.00666667	0.0695933	0.00666667	0.220621	0.00666667
131	284	Cold-storage of mixed inoculum of Glomus intraradices enhances root colonization, phosphorus status and growth of hot pepper	2002	<1	Sandy			Capsicum annuum	Solanaceae	Fibrous	Annual	98	3	14.5	1	Rhizophagus intraradices	Glomeraceae	Rhizophilic guild	0.388112	0.879249	0.00666667	0.568584	0.00666667	0.801651	0.00666667
132	285	Combined application of arbuscular mycorrhizae fungi and plant growth promoting bacteria improves growth and nutrient uptake efficiency of pea (Pisum sativum L.) plants	2018	>2.9	Sandy			Pisum sativum	Fabaceae	Taproot	Annual	60	4		>1	Mixed	Mixed	Mixed	0.25	0.0392207	0.0021384	0.074108	0.0322576	0.0444518	0.0015455
133	286	Combined effects of arbuscular mycorrhizal fungi and exogenous cytokinins on pomegranate ( Punica granatum ) under two contrasting water availability conditions	2015	<1	Sandy	No_P_deficient	Neutral	Punica granatum	Other	Taproot	Perennial	60	6		1	Rhizophagus irregularis	Glomeraceae	Rhizophilic guild	1.52511	0.385725	0.00717683	-0.0544164	0.00229517	0.143591	0.00384588
134	287	Combined Effects of Earthworms and Vesicular-Arbuscular Mycorrhizas on Plant and Aphid Performance	2004	1_2.9	Sandy			Plantago lanceolata	Other	Fibrous	Perennial	70	4	39	1	Rhizophagus intraradices	Glomeraceae	Rhizophilic guild	0.826056	-0.0720877	0.0251811	-0.0663474	0.0132968	-0.0694869	0.019045
135	288	Combined effects of ZnO NPs and Cd on sweet sorghum as influenced by an arbuscular mycorrhizal fungus	2018		No_sandy	No_P_deficient	Alkaline	Sorghum bicolor	Poaceae	Fibrous	Annual	63	4	38	1	Funneliformis caledonium	Glomeraceae	Rhizophilic guild	0.106651	0.206985	0.0266771	0.118117	0.00552842	0.198757	0.0238222
136	289	Combined Inoculation with Multiple Arbuscular Mycorrhizal Fungi Improves Growth, Nutrient Uptake and Photosynthesis in Cucumber Seedlings	2017	<1	No_sandy	No_P_deficient	Alkaline	Trifolium repens	Fabaceae	Fibrous	Perennial	46	4	82.38	>1	Mixed	Mixed	Mixed	0.253	0.543195	0.0142542	0.755834	0.0237659	0.589924	0.015986
136	290	Combined Inoculation with Multiple Arbuscular Mycorrhizal Fungi Improves Growth, Nutrient Uptake and Photosynthesis in Cucumber Seedlings	2017	<1	No_sandy	No_P_deficient	Alkaline	Trifolium repens	Fabaceae	Fibrous	Perennial	46	4	74.65	>1	Mixed	Mixed	Mixed	0.253	0.263963	0.0274401	0.467808	0.0387141	0.308604	0.0297802
136	291	Combined Inoculation with Multiple Arbuscular Mycorrhizal Fungi Improves Growth, Nutrient Uptake and Photosynthesis in Cucumber Seedlings	2017	<1	No_sandy	No_P_deficient	Alkaline	Trifolium repens	Fabaceae	Fibrous	Perennial	46	4	70.32	1	Funneliformis mosseae	Glomeraceae	Rhizophilic guild	0.253	0.240904	0.0187695	0.45884	0.0228114	0.288899	0.0195076
137	292	Community of arbuscular mycorrhizal fungi in a coastal vegetation on Okinawa island and effect of the isolated fungi on growth of sorghum under salt-treated conditions	2008	<1	Sandy		Acidic	Sorghum bicolor	Poaceae	Fibrous	Annual	56	6	83.3569	>1	Mixed	Mixed	Mixed	0.741314	1.80358	0.00333333	0.995715	0.00333333	1.53449	0.00333333
137	293	Community of arbuscular mycorrhizal fungi in a coastal vegetation on Okinawa island and effect of the isolated fungi on growth of sorghum under salt-treated conditions	2008	<1	Sandy		Acidic	Sorghum bicolor	Poaceae	Fibrous	Annual	56	6	62.6771	>1	Mixed	Mixed	Mixed	0.741314	1.62943	0.00333333	0.970053	0.00333333	1.39933	0.00333333
137	294	Community of arbuscular mycorrhizal fungi in a coastal vegetation on Okinawa island and effect of the isolated fungi on growth of sorghum under salt-treated conditions	2008	<1	Sandy		Acidic	Sorghum bicolor	Poaceae	Fibrous	Annual	56	6	71.1048	>1	Mixed	Mixed	Mixed	0.741314	1.52371	0.00333333	0.940008	0.00333333	1.31516	0.00333333
138	295	Comparative Study of Substrate-Based and Commercial Formulations of Arbuscular Mycorrhizal Fungi in Romaine Lettuce Subjected to Salt Stress	2014	>2.9	Sandy			Lactuca sativa	Asteraceae	Taproot	Annual	90	7	33.9	>1	Mixed	Glomeraceae	Rhizophilic guild	0.548387	-0.438255	0.00285714	-0.753772	0.00285714	-0.538997	0.00285714
138	296	Comparative Study of Substrate-Based and Commercial Formulations of Arbuscular Mycorrhizal Fungi in Romaine Lettuce Subjected to Salt Stress	2014	>2.9	Sandy			Lactuca sativa	Asteraceae	Taproot	Annual	90	7	39.6	1	Rhizophagus intraradices	Glomeraceae	Rhizophilic guild	0.548387	-0.0666914	0.00285714	-0.268264	0.00285714	-0.133531	0.00285714
138	297	Comparative Study of Substrate-Based and Commercial Formulations of Arbuscular Mycorrhizal Fungi in Romaine Lettuce Subjected to Salt Stress	2014	>2.9	Sandy			Lactuca sativa	Asteraceae	Taproot	Annual	90	7	11.4	1	Funneliformis mosseae	Glomeraceae	Rhizophilic guild	0.548387	-0.175891	0.00285714	-0.435318	0.00285714	-0.260283	0.00285714
139	298	Comparison of indigenous and selected mycorrhiza in terms of growth increases and mycorrhizal dependency of sour orange under phosphorus and zinc deficient soils	2019	>2.9	No_sandy	No_P_deficient	Alkaline	Citrus aurantium	Rutaceae	Taproot	Perennial	42	3	69	1	Rhizophagus clarus	Glomeraceae	Rhizophilic guild	0.904762	1.83828	0.116786	1.73769	0.0525755	1.79176	0.0818403
139	299	Comparison of indigenous and selected mycorrhiza in terms of growth increases and mycorrhizal dependency of sour orange under phosphorus and zinc deficient soils	2019	>2.9	No_sandy	No_P_deficient	Alkaline	Citrus aurantium	Rutaceae	Taproot	Perennial	42	3	30	>1	Mixed	Mixed	Mixed	0.904762	1.20397	0.0170975	0.987387	0.0422222	1.10691	0.0260359
139	300	Comparison of indigenous and selected mycorrhiza in terms of growth increases and mycorrhizal dependency of sour orange under phosphorus and zinc deficient soils	2019	>2.9	No_sandy	No_P_deficient	Alkaline	Citrus aurantium	Rutaceae	Taproot	Perennial	42	3	63	1	Rhizophagus clarus	Glomeraceae	Rhizophilic guild	0.947368	2.83011	0.0874759	2.51231	0.10251	2.68803	0.0920014
139	301	Comparison of indigenous and selected mycorrhiza in terms of growth increases and mycorrhizal dependency of sour orange under phosphorus and zinc deficient soils	2019	>2.9	No_sandy	No_P_deficient	Alkaline	Citrus aurantium	Rutaceae	Taproot	Perennial	42	3	46.7	>1	Mixed	Mixed	Mixed	0.947368	1.78295	0.0130382	1.78246	0.0062308	1.78271	0.00907414
140	302	Compatible arbuscular mycorrhizal fungi of Jatropha curcas and spore multiplication using cereal crops	2010	1_2.9	No_sandy	P_deficent	Acidic	Coix lacrymajobi	Poaceae	Fibrous	Annual	120	3	24	1	Acaulospora colombiana	Acaulosporaceae	Ancestral guild	0.814596	0.0156559	6.38e-05	0.0655973	0.000863535	0.0383842	0.000279356
140	303	Compatible arbuscular mycorrhizal fungi of Jatropha curcas and spore multiplication using cereal crops	2010	1_2.9	No_sandy	P_deficent	Acidic	Coix lacrymajobi	Poaceae	Fibrous	Annual	120	3	68	1	Gigaspora heterogama	Gigasporaceae	Edaphophilic guild	0.814596	0.0310705	0.000110412	0.0924445	0.000920298	0.0590889	0.000334812
140	304	Compatible arbuscular mycorrhizal fungi of Jatropha curcas and spore multiplication using cereal crops	2010	1_2.9	No_sandy	P_deficent	Acidic	Oryza sativa	Poaceae	Fibrous	Annual	120	3	68	1	Acaulospora colombiana	Acaulosporaceae	Ancestral guild	1.0542	0.10291	0.000414234	0.096365	3.55e-05	0.0995565	0.000168511
140	305	Compatible arbuscular mycorrhizal fungi of Jatropha curcas and spore multiplication using cereal crops	2010	1_2.9	No_sandy	P_deficent	Acidic	Oryza sativa	Poaceae	Fibrous	Annual	120	3	64	1	Gigaspora heterogama	Gigasporaceae	Edaphophilic guild	1.0542	0.0544352	0.00284647	0.0501318	0.000373962	0.052229	0.00129098
140	306	Compatible arbuscular mycorrhizal fungi of Jatropha curcas and spore multiplication using cereal crops	2010	1_2.9	No_sandy	P_deficent	Acidic	Sorghum bicolor	Poaceae	Fibrous	Annual	120	3	54	1	Acaulospora colombiana	Acaulosporaceae	Ancestral guild	0.689038	0.0753855	0.000813177	0.310155	0.0157899	0.177897	0.0046612
140	307	Compatible arbuscular mycorrhizal fungi of Jatropha curcas and spore multiplication using cereal crops	2010	1_2.9	No_sandy	P_deficent	Acidic	Sorghum bicolor	Poaceae	Fibrous	Annual	120	3	32	1	Gigaspora heterogama	Gigasporaceae	Edaphophilic guild	0.689038	0.0898039	0.00104302	0.283615	0.0164539	0.173452	0.00509434
140	308	Compatible arbuscular mycorrhizal fungi of Jatropha curcas and spore multiplication using cereal crops	2010	1_2.9	No_sandy	P_deficent	Acidic	Zea mays	Poaceae	Fibrous	Annual	120	3	49.33	1	Acaulospora colombiana	Acaulosporaceae	Ancestral guild	0.958084	0.118448	0.000169873	0.0953102	0.000313457	0.107194	0.000222432
140	309	Compatible arbuscular mycorrhizal fungi of Jatropha curcas and spore multiplication using cereal crops	2010	1_2.9	No_sandy	P_deficent	Acidic	Zea mays	Poaceae	Fibrous	Annual	120	3	65.33	1	Gigaspora heterogama	Gigasporaceae	Edaphophilic guild	0.958084	0.0841797	0.000533889	0.110348	0.00045064	0.0970694	0.00045974
141	310	Contrasting impacts of defoliation on root colonization by arbuscular mycorrhizal and dark septate endophytic fungi of Medicago sativa	2014		Sandy			Medicago sativa	Fabaceae	Taproot	Perennial	63	10	38.2	1	Rhizophagus intraradices	Glomeraceae	Rhizophilic guild	0.171762	-0.0296277	0.0361332	0.0147971	0.0728168	-0.0162838	0.0456286
142	311	Contribution of Arbuscular Mycorrhizal and Saprobe Fungi to the Aluminum Resistance of Eucalyptus globulus	2007		Sandy			Eucalyptus globulus	Other	Taproot	Perennial	102	10	51.5	1	Funneliformis mosseae	Glomeraceae	Rhizophilic guild	0.556767	0.421022	0.0141202	-0.10329	0.0124274	0.263277	0.0131171
142	312	Contribution of Arbuscular Mycorrhizal and Saprobe Fungi to the Aluminum Resistance of Eucalyptus globulus	2007		Sandy			Eucalyptus globulus	Other	Taproot	Perennial	102	10	65	1	Glomus deserticola	Glomeraceae	Rhizophilic guild	0.556767	0.561473	0.0114132	-0.0712561	0.0100455	0.377929	0.0103875
143	313	Contribution of different arbuscular mycorrhizal fungal inoculum to Elymus nutans under nitrogen addition	2018	>2.9	Sandy			Elymus nutans	Poaceae	Fibrous	Perennial	150	8	7.20873	1	Paraglomus occultum	Paraglomeraceae	Rhizophilic guild	0.422453	0.219233	0.103636	0.752926	0.0887192	0.409392	0.0996079
143	314	Contribution of different arbuscular mycorrhizal fungal inoculum to Elymus nutans under nitrogen addition	2018	>2.9	Sandy			Elymus nutans	Poaceae	Fibrous	Perennial	150	8	24.6849	1	Diversispora eburnea	Diversisporaceae	Edaphophilic guild	0.422453	0.977792	0.101169	1.49925	0.0567432	1.16285	0.086052
143	315	Contribution of different arbuscular mycorrhizal fungal inoculum to Elymus nutans under nitrogen addition	2018	>2.9	Sandy			Elymus nutans	Poaceae	Fibrous	Perennial	150	8	20.0738	1	Claroideoglomus etunicatum	Claroideoglomeraceae	Rhizophilic guild	0.422453	0.319105	0.0964944	0.909584	0.0694266	0.533436	0.0882521
143	316	Contribution of different arbuscular mycorrhizal fungal inoculum to Elymus nutans under nitrogen addition	2018	>2.9	Sandy			Elymus nutans	Poaceae	Fibrous	Perennial	150	8	14.2023	>1	Mixed	Mixed	Mixed	0.422453	0.869162	0.0876397	1.31181	0.0576052	1.0222	0.0775886
144	317	Contribution of Glomus intraradices inoculation to nutrient acquisition and mitigation of ionic imbalance in NaCl-stressed Trigonella foenum-graecum	2012	1_2.9	Sandy		Alkaline	Trigonella foenum-graecum	Fabaceae	Taproot	Annual	51	3	68	1	Rhizophagus intraradices	Glomeraceae	Rhizophilic guild	0.222222	0.927341	0.00887658	0.223144	0.025625	0.830931	0.0107152
145	318	Contribution of the saprobic fungi Trametes versicolor and Trichoderma harzianum and the arbuscular mycorrhizal fungi Glomus deserticola and Glomus claroideum to arsenic tolerance of Eucalyptus globulus	2009	<1	Sandy		Acidic	Eucalyptus globulus	Other	Taproot	Perennial	84	10	68	1	Glomus deserticola	Glomeraceae	Rhizophilic guild	0.483441	0.269264	0.00633903	0.499674	0.00338568	0.350331	0.00521381
145	319	Contribution of the saprobic fungi Trametes versicolor and Trichoderma harzianum and the arbuscular mycorrhizal fungi Glomus deserticola and Glomus claroideum to arsenic tolerance of Eucalyptus globulus	2009	<1	Sandy		Acidic	Eucalyptus globulus	Other	Taproot	Perennial	84	10	68	1	Claroideoglomus claroideum	Claroideoglomeraceae	Rhizophilic guild	0.483441	0.256783	0.00601705	0.45617	0.00355158	0.326224	0.00510937
146	320	Contributions of arbuscular mycorrhizal fungi to growth, photosynthesis, root morphology and ionic balance of citrus seedlings under salt stress	2010					Citrus tangerine	Rutaceae	Taproot	Perennial	145	3	69	1	Funneliformis mosseae	Glomeraceae	Rhizophilic guild	0.6	0.215111	0.00666667	0.182322	0.00666667	0.202941	0.00666667
146	321	Contributions of arbuscular mycorrhizal fungi to growth, photosynthesis, root morphology and ionic balance of citrus seedlings under salt stress	2010					Citrus tangerine	Rutaceae	Taproot	Perennial	145	3	67	1	Paraglomus occultum	Paraglomeraceae	Rhizophilic guild	0.6	0.24686	0.00666667	0.236389	0.00666667	0.242946	0.00666667
147	322	Cr Stable Isotope Fractionation in Arbuscular Mycorrhizal Dandelion and Cr Uptake by Extraradical Mycelium	2015	<1	Sandy	P_deficent	Alkaline	Taraxacum platypecidum	Asteraceae	Taproot	Annual	65	4	76.8	1	Rhizophagus irregularis	Glomeraceae	Rhizophilic guild	0.561927	1.32316	0.0824036	1.43366	0.112243	1.36434	0.091927
148	323	Cultured arbuscular mycorrhizal fungi and native soil inocula improve seedling development of two pioneer trees in the Andean region	2014	<1	No_sandy	No_P_deficient	Acidic	Alnus acuminata	Other	Taproot	Perennial	180	5	13	1	Rhizophagus irregularis	Glomeraceae	Rhizophilic guild	1.11575	1.01491	0.0510295	0.250131	0.0201254	0.683757	0.0385055
149	324	DDT uptake by arbuscular mycorrhizal alfalfa and depletion in soil as influenced by soil application of a non-ionic surfactant	2008	<1	Sandy	P_deficent	Alkaline	Medicago sativa	Fabaceae	Taproot	Perennial	60	3	70.3	1	Claroideoglomus etunicatum	Claroideoglomeraceae	Rhizophilic guild	0.769231	0.242731	0.00557363	-0.074108	0.0103574	0.117093	0.00704893
150	325	Decreased ZnO nanoparticle phytotoxicity to maize by arbuscular mycorrhizal fungus and organic phosphorus	2018	1_2.9	No_sandy	No_P_deficient	Alkaline	Zea mays	Poaceae	Fibrous	Annual	63	4	62	1	Funneliformis mosseae	Glomeraceae	Rhizophilic guild	0.260369	0.47891	0.00731627	0.442014	0.00636236	0.471399	0.00708225
151	326	Dependence of 3 Nebraska Sandhills warm- season grasses on vesicular-arbuscular mycorrh izae	1993	1_2.9	Sandy	P_deficent	Acidic	Andropogon gerardii	Poaceae	Fibrous	Perennial	90	2	29.5	>1	Mixed	Glomeraceae	Rhizophilic guild	1.33333	2.31911	0.0207949	1.80006	0.0461314	2.05595	0.0314939
151	327	Dependence of 3 Nebraska Sandhills warm- season grasses on vesicular-arbuscular mycorrh izae	1993	1_2.9	Sandy	P_deficent	Acidic	Andropogon gerardii	Poaceae	Fibrous	Perennial	90	2	39	1	Glomus deserticola	Glomeraceae	Rhizophilic guild	1.33333	2.71248	0.0476937	2.49527	0.122951	2.59419	0.0825762
151	328	Dependence of 3 Nebraska Sandhills warm- season grasses on vesicular-arbuscular mycorrh izae	1993	1_2.9	Sandy	P_deficent	Acidic	Calamovilfa longifolia	Poaceae	Fibrous	Perennial	90	2	29.5	>1	Mixed	Glomeraceae	Rhizophilic guild	1	1.51114	0.284382	1.55253	0.267262	1.53205	0.274056
151	329	Dependence of 3 Nebraska Sandhills warm- season grasses on vesicular-arbuscular mycorrh izae	1993	1_2.9	Sandy	P_deficent	Acidic	Calamovilfa longifolia	Poaceae	Fibrous	Perennial	90	2	39	1	Glomus deserticola	Glomeraceae	Rhizophilic guild	1	2.21131	0.260739	2.36845	0.259398	2.29296	0.258029
151	330	Dependence of 3 Nebraska Sandhills warm- season grasses on vesicular-arbuscular mycorrh izae	1993	1_2.9	Sandy	P_deficent	Acidic	Panicum virgatum	Poaceae	Fibrous	Annual	90	2	40.5	>1	Mixed	Glomeraceae	Rhizophilic guild	0.944444	3.10109	0.0935707	3.13293	0.116906	3.11668	0.0930748
151	331	Dependence of 3 Nebraska Sandhills warm- season grasses on vesicular-arbuscular mycorrh izae	1993	1_2.9	Sandy	P_deficent	Acidic	Panicum virgatum	Poaceae	Fibrous	Annual	90	2	35.5	1	Glomus deserticola	Glomeraceae	Rhizophilic guild	0.944444	3.47093	0.0241849	3.41676	0.199339	3.44499	0.0866749
152	332	Dependency of Cassia siamea on vesicular arbuscular mycorrhizal fungi	2008	>2.9	No_sandy		Acidic	Cassia siamea	Fabaceae	Taproot	Perennial	30	3	60	1	Glomus aggregatum	Glomeraceae	Rhizophilic guild	0.361371	1.58052	0.00666667	1.24365	0.00666667	1.50157	0.00666667
153	333	Determination of different growth media and various mycorrhizae species on citrus growth and nutrient uptake	2014	>2.9	Sandy	No_P_deficient	Alkaline	Citrus aurantium	Rutaceae	Taproot	Perennial	210	3	16.7	1	Funneliformis mosseae	Glomeraceae	Rhizophilic guild	0.930462	0.702603	0.631671	-0.49305	0.707249	0.292852	0.44544
153	334	Determination of different growth media and various mycorrhizae species on citrus growth and nutrient uptake	2014	>2.9	Sandy	No_P_deficient	Alkaline	Citrus aurantium	Rutaceae	Taproot	Perennial	210	3	23.3	1	Funneliformis caledonium	Glomeraceae	Rhizophilic guild	0.930462	0.861117	0.583885	0.414888	0.0799021	0.670564	0.289394
153	335	Determination of different growth media and various mycorrhizae species on citrus growth and nutrient uptake	2014	>2.9	Sandy	No_P_deficient	Alkaline	Citrus aurantium	Rutaceae	Taproot	Perennial	210	3	23.3	1	Claroideoglomus etunicatum	Claroideoglomeraceae	Rhizophilic guild	0.930462	0.452508	0.670417	0.0551685	0.0769733	0.280484	0.326915
153	336	Determination of different growth media and various mycorrhizae species on citrus growth and nutrient uptake	2014	>2.9	Sandy	No_P_deficient	Alkaline	Citrus aurantium	Rutaceae	Taproot	Perennial	210	3	23.3	1	Rhizophagus clarus	Glomeraceae	Rhizophilic guild	0.930462	1.18142	0.538536	0.621126	0.0771505	0.949797	0.264687
153	337	Determination of different growth media and various mycorrhizae species on citrus growth and nutrient uptake	2014	>2.9	Sandy	No_P_deficient	Alkaline	Citrus aurantium	Rutaceae	Taproot	Perennial	210	3	20	1	Gigaspora margarita	Gigasporaceae	Edaphophilic guild	0.930462	0.736516	0.608514	0.126483	0.268804	0.487915	0.372894
153	338	Determination of different growth media and various mycorrhizae species on citrus growth and nutrient uptake	2014	>2.9	Sandy	No_P_deficient	Alkaline	Citrus aurantium	Rutaceae	Taproot	Perennial	210	3	20	1	Glomus macrocarpum	Glomeraceae	Rhizophilic guild	0.930462	0.641544	0.634178	0.212438	0.240461	0.457417	0.385295
153	339	Determination of different growth media and various mycorrhizae species on citrus growth and nutrient uptake	2014	>2.9	Sandy	No_P_deficient	Alkaline	Citrus aurantium	Rutaceae	Taproot	Perennial	210	3	20	1	Rhizophagus fasciculatus	Glomeraceae	Rhizophilic guild	0.930462	0.991668	0.572953	0.725233	0.0698319	0.872057	0.274115
153	340	Determination of different growth media and various mycorrhizae species on citrus growth and nutrient uptake	2014	>2.9	Sandy	No_P_deficient	Alkaline	Citrus aurantium	Rutaceae	Taproot	Perennial	210	3	16.7	1	Rhizophagus intraradices	Glomeraceae	Rhizophilic guild	0.930462	1.1508	0.550406	0.547472	0.221807	0.904457	0.315089
153	341	Determination of different growth media and various mycorrhizae species on citrus growth and nutrient uptake	2014	>2.9	Sandy	No_P_deficient	Alkaline	Citrus aurantium	Rutaceae	Taproot	Perennial	210	3	10	>1	Mixed	Glomeraceae	Rhizophilic guild	0.930462	1.30289	0.536817	0.818365	0.073736	1.09822	0.261679
153	342	Determination of different growth media and various mycorrhizae species on citrus growth and nutrient uptake	2014	>2.9	Sandy	No_P_deficient	Alkaline	Citrus aurantium	Rutaceae	Taproot	Perennial	210	3	20	>1	Mixed	Glomeraceae	Rhizophilic guild	0.930462	0.989996	0.564483	0.534017	0.13155	0.795815	0.301549
153	343	Determination of different growth media and various mycorrhizae species on citrus growth and nutrient uptake	2014	>2.9	Sandy	No_P_deficient	Alkaline	Citrus aurantium	Rutaceae	Taproot	Perennial	210	3	26.7	>1	Mixed	Glomeraceae	Rhizophilic guild	0.930462	1.05746	0.545442	0.512162	0.300468	0.831069	0.330245
154	344	Determining the effects of biochar and an arbuscular mycorrhizal inoculant on the growth of fowl mannagrass ( Glyceria striata ) (Poaceae)	2018	<1	Sandy			Glyceria striata	Poaceae	Fibrous	Perennial	91	4		1	Rhizophagus intraradices	Glomeraceae	Rhizophilic guild	2.4818	0.11823	0.159128	-0.0545084	0.141395	-0.00176948	0.146566
155	345	Differences among mycorrhizal fungi for mineral uptake per root length of switchgrass grown in acidic soil	2002	1_2.9	No_sandy	P_deficent	Acidic	Sorghum bicolor	Poaceae	Fibrous	Annual	88	5		1	Rhizophagus intraradices	Glomeraceae	Rhizophilic guild	0.8125	2.47444	0.004	1.63974	0.004	2.18178	0.004
155	346	Differences among mycorrhizal fungi for mineral uptake per root length of switchgrass grown in acidic soil	2002	1_2.9	No_sandy	P_deficent	Acidic	Sorghum bicolor	Poaceae	Fibrous	Annual	88	5		1	Gigaspora rosea	Gigasporaceae	Edaphophilic guild	0.8125	0.0606246	0.004	-0.167054	0.004	-0.0350913	0.004
155	347	Differences among mycorrhizal fungi for mineral uptake per root length of switchgrass grown in acidic soil	2002	1_2.9	No_sandy	P_deficent	Acidic	Sorghum bicolor	Poaceae	Fibrous	Annual	88	5		1	Gigaspora albida	Gigasporaceae	Edaphophilic guild	0.8125	2.89729	0.004	2.90732	0.004	2.9018	0.004
155	348	Differences among mycorrhizal fungi for mineral uptake per root length of switchgrass grown in acidic soil	2002	1_2.9	No_sandy	P_deficent	Acidic	Sorghum bicolor	Poaceae	Fibrous	Annual	88	5		1	Claroideoglomus etunicatum	Claroideoglomeraceae	Rhizophilic guild	0.8125	3.57655	0.004	1.68355	0.004	3.09729	0.004
155	349	Differences among mycorrhizal fungi for mineral uptake per root length of switchgrass grown in acidic soil	2002	1_2.9	No_sandy	P_deficent	Acidic	Sorghum bicolor	Poaceae	Fibrous	Annual	88	5		1	Gigaspora margarita	Gigasporaceae	Edaphophilic guild	0.8125	3.49081	0.004	1.76578	0.004	3.0313	0.004
155	350	Differences among mycorrhizal fungi for mineral uptake per root length of switchgrass grown in acidic soil	2002	1_2.9	No_sandy	P_deficent	Acidic	Sorghum bicolor	Poaceae	Fibrous	Annual	88	5		1	Acaulospora morrowiae	Acaulosporaceae	Ancestral guild	0.8125	3.09671	0.004	2.63355	0.004	2.91497	0.004
155	351	Differences among mycorrhizal fungi for mineral uptake per root length of switchgrass grown in acidic soil	2002	1_2.9	No_sandy	P_deficent	Acidic	Sorghum bicolor	Poaceae	Fibrous	Annual	88	5		1	Glomus diaphanum	Glomeraceae	Rhizophilic guild	0.8125	3.59216	0.004	2.05017	0.004	3.15773	0.004
155	352	Differences among mycorrhizal fungi for mineral uptake per root length of switchgrass grown in acidic soil	2002	1_2.9	No_sandy	P_deficent	Acidic	Sorghum bicolor	Poaceae	Fibrous	Annual	88	5		1	Rhizophagus clarus	Glomeraceae	Rhizophilic guild	0.8125	3.44002	0.004	2.74332	0.004	3.18521	0.004
156	353	Different interaction among Glomus and Rhizobium species on Phaseolus vulgaris and Zea mays plant growth, physiology and symbiotic development under moderate drought stress conditions	2013	1_2.9	Sandy	P_deficent	Alkaline	Phaseolus vulgaris	Fabaceae	Taproot	Annual	60	5	24	1	Rhizophagus intraradices	Glomeraceae	Rhizophilic guild	0.334789	0.366877	0.0210267	0.56789	0.0330041	0.421216	0.0232871
156	354	Different interaction among Glomus and Rhizobium species on Phaseolus vulgaris and Zea mays plant growth, physiology and symbiotic development under moderate drought stress conditions	2013	1_2.9	Sandy	P_deficent	Alkaline	Phaseolus vulgaris	Fabaceae	Taproot	Annual	60	5	53	1	Funneliformis mosseae	Glomeraceae	Rhizophilic guild	1.02609	0.29939	0.00985498	0.61303	0.0555492	0.470457	0.0299956
156	355	Different interaction among Glomus and Rhizobium species on Phaseolus vulgaris and Zea mays plant growth, physiology and symbiotic development under moderate drought stress conditions	2013	1_2.9	Sandy	P_deficent	Alkaline	Zea mays	Poaceae	Fibrous	Annual	60	5	32	1	Funneliformis mosseae	Glomeraceae	Rhizophilic guild	0.334789	0.51964	0.0181676	0.193293	0.034911	0.447242	0.01892
157	356	Differential effects of AM fungal isolates on Medicago truncatula growth and metal uptake in a multimetallic (Cd, Zn, Pb) contaminated agricultural soil	2009		No_sandy	No_P_deficient	Alkaline	Medicago truncatula	Fabaceae	Taproot	Perennial	45	3	44	1	Rhizophagus intraradices	Glomeraceae	Rhizophilic guild	0.509011	1.14007	0.00121453	0.383647	0.0102007	0.942837	0.00259704
157	357	Differential effects of AM fungal isolates on Medicago truncatula growth and metal uptake in a multimetallic (Cd, Zn, Pb) contaminated agricultural soil	2009		No_sandy	No_P_deficient	Alkaline	Medicago truncatula	Fabaceae	Taproot	Perennial	45	3	63	1	Rhizophagus intraradices	Glomeraceae	Rhizophilic guild	0.509011	-0.0664063	0.0036803	-0.264095	0.00915483	-0.12882	0.00510812
158	358	Differential growth response to arbuscular mycorrhizal fungi and plant density in two wild plants belonging to contrasting functional types	2009	<1	Sandy		Acidic	Acacia caven	Fabaceae	Taproot	Perennial	150	8		>1	Mixed	Mixed	Mixed	1.2453	0.694932	0.0242681	0.346685	0.0192	0.487791	0.0213137
159	359	Disease Tolerance and Changes in Antioxidative Abilities in Mycorrhizal Strawberry Plants	2010		No_sandy			Fragaria ananassa	Other	Fibrous	Perennial	70	3	39	1	Funneliformis mosseae	Glomeraceae	Rhizophilic guild	0.708022	0.634099	0.0274411	0.332886	0.0213573	0.520022	0.0249104
159	360	Disease Tolerance and Changes in Antioxidative Abilities in Mycorrhizal Strawberry Plants	2010		No_sandy			Fragaria ananassa	Other	Fibrous	Perennial	70	3	48	1	Funneliformis mosseae	Glomeraceae	Rhizophilic guild	0.726572	0.688393	0.00320001	0.98332	0.0215936	0.823231	0.00912417
160	361	Diversity of Arbuscular Mycorrhizal Fungi in Mimosa invisa and Effect of the Soil pH on the Symbiosis	2010	>2.9	Sandy	No_P_deficient	Acidic	Mimosa invisa	Fabaceae	Taproot	Perennial	120	4	69.75	>1	Mixed	Mixed	Mixed	0.140987	0.132335	0.005	0.0855222	0.005	0.126668	0.005
160	362	Diversity of Arbuscular Mycorrhizal Fungi in Mimosa invisa and Effect of the Soil pH on the Symbiosis	2010	>2.9	Sandy	No_P_deficient	Acidic	Mimosa invisa	Fabaceae	Taproot	Perennial	120	4	49.75	>1	Mixed	Mixed	Mixed	0.190025	0.33183	0.005	0.316782	0.005	0.329442	0.005
161	363	Do fungivores trigger the transfer of protective metabolites from host plants to arbuscular mycorrhizal hyphae?	2013	>2.9	Sandy			Plantago lanceolata	Other	Fibrous	Perennial	84	10	57	1	Rhizophagus intraradices	Glomeraceae	Rhizophilic guild	1.19989	0.46641	0.000857461	0.0884482	0.0437572	0.278065	0.0116871
162	364	Do maize and pepper plants depend on mycorrhizae in terms of phosphorus and zinc uptake?	2012	1_2.9	No_sandy	No_P_deficient	Alkaline	Capsicum annuum	Solanaceae	Fibrous	Annual	51	3	85.9	1	Claroideoglomus etunicatum	Claroideoglomeraceae	Rhizophilic guild	1.29154	0.900418	0.020024	0.310939	0.0139151	0.61137	0.0157978
162	365	Do maize and pepper plants depend on mycorrhizae in terms of phosphorus and zinc uptake?	2012	1_2.9	No_sandy	No_P_deficient	Alkaline	Capsicum annuum	Solanaceae	Fibrous	Annual	51	3	87.4	1	Funneliformis mosseae	Glomeraceae	Rhizophilic guild	1.29154	0.894255	0.0178817	0.284737	0.0139191	0.596892	0.0150854
162	366	Do maize and pepper plants depend on mycorrhizae in terms of phosphorus and zinc uptake?	2012	1_2.9	No_sandy	No_P_deficient	Alkaline	Capsicum annuum	Solanaceae	Fibrous	Annual	51	3	93.7	1	Claroideoglomus etunicatum	Claroideoglomeraceae	Rhizophilic guild	1.60587	1.82154	0.0855767	0.867501	0.0822893	1.34531	0.0835433
162	367	Do maize and pepper plants depend on mycorrhizae in terms of phosphorus and zinc uptake?	2012	1_2.9	No_sandy	No_P_deficient	Alkaline	Capsicum annuum	Solanaceae	Fibrous	Annual	51	3	90.8	1	Funneliformis mosseae	Glomeraceae	Rhizophilic guild	1.60587	1.82173	0.0661081	0.906721	0.0659349	1.36059	0.0652184
162	368	Do maize and pepper plants depend on mycorrhizae in terms of phosphorus and zinc uptake?	2012	1_2.9	No_sandy	No_P_deficient	Alkaline	Zea mays	Poaceae	Fibrous	Annual	51	3	76	1	Claroideoglomus etunicatum	Claroideoglomeraceae	Rhizophilic guild	0.347245	1.16467	0.125914	0.934309	0.265625	1.11018	0.155889
162	369	Do maize and pepper plants depend on mycorrhizae in terms of phosphorus and zinc uptake?	2012	1_2.9	No_sandy	No_P_deficient	Alkaline	Zea mays	Poaceae	Fibrous	Annual	51	3	64	1	Funneliformis mosseae	Glomeraceae	Rhizophilic guild	0.347245	1.37381	0.194813	1.15745	0.398776	1.32237	0.237683
162	370	Do maize and pepper plants depend on mycorrhizae in terms of phosphorus and zinc uptake?	2012	1_2.9	No_sandy	No_P_deficient	Alkaline	Zea mays	Poaceae	Fibrous	Annual	51	3	72.67	1	Claroideoglomus etunicatum	Claroideoglomeraceae	Rhizophilic guild	0.541649	1.40078	0.161533	0.826679	0.144133	1.23418	0.142961
162	371	Do maize and pepper plants depend on mycorrhizae in terms of phosphorus and zinc uptake?	2012	1_2.9	No_sandy	No_P_deficient	Alkaline	Zea mays	Poaceae	Fibrous	Annual	51	3	53.67	1	Funneliformis mosseae	Glomeraceae	Rhizophilic guild	0.541649	1.79013	0.230099	1.12214	0.187636	1.60236	0.208805
163	372	Does Inoculation with Glomus mosseae Improve Salt Tolerance in Pepper Plants?	2014	1_2.9	Sandy	No_P_deficient	Neutral	Capsicum annuum	Solanaceae	Fibrous	Annual	30	6	48	1	Funneliformis mosseae	Glomeraceae	Rhizophilic guild	0.352601	0.140013	0.00333333	0.179586	0.00333333	0.150481	0.00333333
164	373	Drought responses of arbuscular mycorrhizal grapevines	2006	>2.9	Sandy			Vitis vinifera	Other	Taproot	Perennial	28	4	68.17	1	Funneliformis mosseae	Glomeraceae	Rhizophilic guild	0.950765	-1.38829	0.005	-1.46564	0.005	-1.42524	0.005
165	374	Dual inoculation of pretransplant stage Oryza sativa L. plants with indigenous vesicular-arbuscular mycorrhizal fungi and fluorescent Pseudomonas spp.	1992	1_2.9	Sandy	No_P_deficient	Acidic	Oryza sativa	Poaceae	Fibrous	Annual	45	4	29.7	>1	Mixed	Mixed	Mixed	0.685039	-0.279839	0.00446425	0.329882	0.00981872	0.101469	0.00165544
166	375	Dual Inoculation of Sorghum bicolor (L.) Moench ssp. bicolor with Vesicular Arbuscular Mycorrhizas and Acetobacter diazotrophicus	1995	>2.9	Sandy			Sorghum bicolor	Poaceae	Fibrous	Annual	30	12	64	1	Funneliformis mosseae	Glomeraceae	Rhizophilic guild	0.553691	0.677531	0.00166667	0.532211	0.00166667	0.62813	0.00166667
166	376	Dual Inoculation of Sorghum bicolor (L.) Moench ssp. bicolor with Vesicular Arbuscular Mycorrhizas and Acetobacter diazotrophicus	1995	>2.9	Sandy			Sorghum bicolor	Poaceae	Fibrous	Annual	30	12	58	1	Paraglomus occultum	Paraglomeraceae	Rhizophilic guild	0.553691	0.698623	0.00166667	0.447502	0.00166667	0.616176	0.00166667
166	377	Dual Inoculation of Sorghum bicolor (L.) Moench ssp. bicolor with Vesicular Arbuscular Mycorrhizas and Acetobacter diazotrophicus	1995	>2.9	Sandy			Sorghum bicolor	Poaceae	Fibrous	Annual	30	12	62	1	Glomus constrictum	Glomeraceae	Rhizophilic guild	0.553691	0.363837	0.00166667	0.55608	0.00166667	0.436658	0.00166667
166	378	Dual Inoculation of Sorghum bicolor (L.) Moench ssp. bicolor with Vesicular Arbuscular Mycorrhizas and Acetobacter diazotrophicus	1995	>2.9	Sandy			Sorghum bicolor	Poaceae	Fibrous	Annual	30	12	34	1	Scutellospora persica	Gigasporaceae	Edaphophilic guild	0.553691	0.2471	0.00166667	0.134334	0.00166667	0.208355	0.00166667
167	379	Dual inoculation with Aspergillus fumigatus and Glomus mosseae enhances biomass production and nutrient uptake in wheat (Triticum aestivum L.) supplied with organic phosphorus as Na-phytate	1995	<1	Sandy	P_deficent	Acidic	Triticum aestivum	Poaceae	Fibrous	Annual	50	4	42	1	Funneliformis mosseae	Glomeraceae	Rhizophilic guild	0.295455	0.147636	0.005	0.479573	0.005	0.233615	0.005
168	380	Duration and intensity of shade differentially affects mycorrhizal growth- and phosphorus uptake responses of Medicago truncatula	2015	1_2.9	No_sandy	P_deficent	Alkaline	Medicago truncatula	Fabaceae	Taproot	Perennial	55	5	72	1	Rhizophagus irregularis	Glomeraceae	Rhizophilic guild	0.403853	0.223199	0.00410619	0.28213	0.0128159	0.240449	0.0061478
169	381	Early Root Herbivory Impairs Arbuscular Mycorrhizal Fungal Colonization and Shifts Defence Allocation in Establishing Plantago lanceolata	2013		Sandy			Plantago lanceolata	Other	Fibrous	Perennial	77	10	62	>1	Mixed	Mixed	Mixed	1.31597	0.200495	0.0567264	0.117216	0.0225298	0.154028	0.0180212
170	382	Earthworm–mycorrhiza interaction on Cd uptake and growth of ryegrass	2005	<1	No_sandy		Neutral	Lolium mutiflorum	Poaceae	Fibrous	Perennial	35	3		>1	Mixed	Mixed	Mixed	0.325714	0.0169976	0.00666667	0.191055	0.00666667	0.062651	0.00666667
171	383	Earthworms and mycorrhization increase copper phytoextraction by Canavalia ensiformis in sandy soil	2019	>2.9	Sandy	P_deficent	Acidic	Canavalia ensiformis	Fabaceae	Taproot	Perennial	60	3	48	1	Rhizophagus clarus	Glomeraceae	Rhizophilic guild	0.112084	-0.16666	0.00836247	0.0214148	0.0999524	-0.146019	0.0133622
172	384	Effect of three vesicular‐arbuscular mycorrhizae species and phosphorus on reproductive and vegetative growth of three strawberry cultivars	1995		Sandy			Fragaria ananassa	Other	Fibrous	Perennial	84	4		1	Rhizophagus intraradices	Glomeraceae	Rhizophilic guild	0.666667	0.583146	0.005	0.271934	0.005	0.470004	0.005
172	385	Effect of three vesicular‐arbuscular mycorrhizae species and phosphorus on reproductive and vegetative growth of three strawberry cultivars	1995		Sandy			Fragaria ananassa	Other	Fibrous	Perennial	84	4		1	Diversispora versiformis	Diversisporaceae	Edaphophilic guild	0.666667	0.559616	0.005	0.405465	0.005	0.500775	0.005
172	386	Effect of three vesicular‐arbuscular mycorrhizae species and phosphorus on reproductive and vegetative growth of three strawberry cultivars	1995		Sandy			Fragaria ananassa	Other	Fibrous	Perennial	84	4		1	Funneliformis mosseae	Glomeraceae	Rhizophilic guild	0.666667	0.485508	0.005	0.17185	0.005	0.371564	0.005
173	387	Effect of arbuscular mycorrhiza on the growth and development of micropropagated Annona cherimola plants	1994	<1	Sandy		Acidic	Annona cherimola	Other	Taproot	Perennial	70	20	36	1	Funneliformis mosseae	Glomeraceae	Rhizophilic guild	0.514819	0.353924	0.001	0.0695298	0.001	0.266049	0.001
173	388	Effect of arbuscular mycorrhiza on the growth and development of micropropagated Annona cherimola plants	1994	<1	Sandy		Acidic	Annona cherimola	Other	Taproot	Perennial	70	20	43	1	Glomus deserticola	Glomeraceae	Rhizophilic guild	0.514819	0.88014	0.001	0.53495	0.001	0.775658	0.001
173	389	Effect of arbuscular mycorrhiza on the growth and development of micropropagated Annona cherimola plants	1994	<1	Sandy		Acidic	Annona cherimola	Other	Taproot	Perennial	70	20	56	1	Glomus sp.	Glomeraceae	Rhizophilic guild	0.514819	0.946982	0.001	0.531984	0.001	0.824323	0.001
174	390	Effect of arbuscular mycorrhizal (AM) colonization on terpene emission and content of Artemisia annua L.	2007	<1	No_sandy			Artemisia annua	Asteraceae	Taproot	Annual	63	3	77	1	Glomus sp.	Glomeraceae	Rhizophilic guild	1.32	0.0582689	0.028504	0.0870114	0.180748	0.0747235	0.0994146
175	391	Effect of arbuscular mycorrhizal (AM) inoculation on growth of Chili plant in organic manure amended soil	2011		No_sandy	P_deficent	Acidic	Capsicum frutescens	Solanaceae	Fibrous	Annual	90	5	33.13	1	Acaulospora denticulate	Acaulosporaceae	Ancestral guild	0.117925	0.081493	0.0030639	0.277632	0.00652321	0.104094	0.00322348
175	392	Effect of arbuscular mycorrhizal (AM) inoculation on growth of Chili plant in organic manure amended soil	2011		No_sandy	P_deficent	Acidic	Capsicum frutescens	Solanaceae	Fibrous	Annual	90	5	34.91	1	Gigaspora albida	Gigasporaceae	Edaphophilic guild	0.117925	0.0858314	0.0034716	0.307485	0.00358677	0.11167	0.00343937
175	393	Effect of arbuscular mycorrhizal (AM) inoculation on growth of Chili plant in organic manure amended soil	2011		No_sandy	P_deficent	Acidic	Capsicum frutescens	Solanaceae	Fibrous	Annual	90	5	39.74	1	Funneliformis geosporum	Glomeraceae	Rhizophilic guild	0.117925	0.156842	0.00247041	0.336472	0.0034289	0.177387	0.00239594
175	394	Effect of arbuscular mycorrhizal (AM) inoculation on growth of Chili plant in organic manure amended soil	2011		No_sandy	P_deficent	Acidic	Capsicum frutescens	Solanaceae	Fibrous	Annual	90	5	36.84	1	Scutellospora corolloidea	Gigasporaceae	Edaphophilic guild	0.117925	0.148745	0.00310228	0.307485	0.00164905	0.166729	0.00291046
175	395	Effect of arbuscular mycorrhizal (AM) inoculation on growth of Chili plant in organic manure amended soil	2011		No_sandy	P_deficent	Acidic	Capsicum frutescens	Solanaceae	Fibrous	Annual	90	5	32.46	1	Scutellospora scutata	Gigasporaceae	Edaphophilic guild	0.117925	0.0550598	0.003636	0.24686	0.003284	0.0771173	0.00356046
176	396	Effect of arbuscular mycorrhizal colonisation on the growth and phosphorus nutrition of Populus euramericana c.v. Ghoy	2011	>2.9	Sandy			Populus euramericana	Other	Taproot	Perennial	105	4	59	1	Glomus hoi	Glomeraceae	Rhizophilic guild	2.37624	-1.72475	0.369621	-2.50657	0.188572	-2.20564	0.297382
176	397	Effect of arbuscular mycorrhizal colonisation on the growth and phosphorus nutrition of Populus euramericana c.v. Ghoy	2011	>2.9	Sandy			Populus euramericana	Other	Taproot	Perennial	105	4	63	1	Rhizophagus intraradices	Glomeraceae	Rhizophilic guild	2.37624	-0.7233	0.00732706	-1.37446	0.0937253	-1.134	0.0524497
176	398	Effect of arbuscular mycorrhizal colonisation on the growth and phosphorus nutrition of Populus euramericana c.v. Ghoy	2011	>2.9	Sandy			Populus euramericana	Other	Taproot	Perennial	105	4	69	1	Funneliformis mosseae	Glomeraceae	Rhizophilic guild	2.37624	-0.697399	0.0326891	-1.29532	0.121965	-1.07829	0.0811033
176	399	Effect of arbuscular mycorrhizal colonisation on the growth and phosphorus nutrition of Populus euramericana c.v. Ghoy	2011	>2.9	Sandy			Populus euramericana	Other	Taproot	Perennial	105	4	67	1	Gigaspora rosea	Gigasporaceae	Edaphophilic guild	2.37624	-1.32992	0.00626824	-1.9091	0.106139	-1.70015	0.0470655
177	400	Effect of arbuscular mycorrhizal colonization and two levels of compost supply on nutrient uptake and flowering of pelargonium plants	2007	<1	Sandy	No_P_deficient	Alkaline	Pelargonium peltatum	Other	Taproot	Perennial	56	4	36.4	>1	Mixed	Mixed	Mixed	0.0794979	-0.0471179	0.00518843	-0.17185	0.0462366	-0.0557914	0.006672
177	401	Effect of arbuscular mycorrhizal colonization and two levels of compost supply on nutrient uptake and flowering of pelargonium plants	2008	<1	Sandy	No_P_deficient	Alkaline	Pelargonium peltatum	Other	Taproot	Perennial	56	4	34	>1	Mixed	Mixed	Mixed	0.0794979	0.0329248	0.00340136	0.0512933	0.0510803	0.0342891	0.00497397
177	402	Effect of arbuscular mycorrhizal colonization and two levels of compost supply on nutrient uptake and flowering of pelargonium plants	2009	<1	Sandy	No_P_deficient	Alkaline	Pelargonium peltatum	Other	Taproot	Perennial	56	4	15	>1	Mixed	Mixed	Mixed	0.0794979	0.0329248	0.00340136	0.351398	0.0165673	0.0601685	0.00406885
178	403	Effect of arbuscular mycorrhizal fungal inoculation on Eucalyptus globulus seedlings and some soil enzyme activities under application of sewage sludge amendment	2009	<1	No_sandy	P_deficent	Acidic	Eucalyptus globulus	Other	Taproot	Perennial	102	10	31	1	Claroideoglomus claroideum	Claroideoglomeraceae	Rhizophilic guild	0.137702	0.559083	0.0267768	0.101435	0.013414	0.513617	0.0252909
178	404	Effect of arbuscular mycorrhizal fungal inoculation on Eucalyptus globulus seedlings and some soil enzyme activities under application of sewage sludge amendment	2009	<1	No_sandy	P_deficent	Acidic	Eucalyptus globulus	Other	Taproot	Perennial	102	10	37	1	Glomus viscosum	Glomeraceae	Rhizophilic guild	0.137702	0.4776	0.0136775	0.00485022	0.0156558	0.430932	0.0139338
178	405	Effect of arbuscular mycorrhizal fungal inoculation on Eucalyptus globulus seedlings and some soil enzyme activities under application of sewage sludge amendment	2009	<1	No_sandy	P_deficent	Acidic	Eucalyptus globulus	Other	Taproot	Perennial	102	10	47	1	Rhizophagus intraradices	Glomeraceae	Rhizophilic guild	0.137702	0.479347	0.0244626	0.0288713	0.018139	0.434458	0.023912
178	406	Effect of arbuscular mycorrhizal fungal inoculation on Eucalyptus globulus seedlings and some soil enzyme activities under application of sewage sludge amendment	2009	<1	No_sandy	P_deficent	Acidic	Eucalyptus globulus	Other	Taproot	Perennial	102	10	6	1	Glomus constrictum	Glomeraceae	Rhizophilic guild	0.137702	0.479372	0.0213672	0.00781438	0.0124255	0.432798	0.0203831
179	407	Effect of arbuscular mycorrhizal fungi (Glomus spp.) on growth and arsenic uptake of vetiver grass (Chrysopogon zizanioides L.) from contaminated soil and water systems	2014		Sandy	No_P_deficient	Acidic	Chrysopogon zizanioides	Poaceae	Fibrous	Perennial	28	3		>1	Mixed	Mixed	Mixed	0.459315	0.030577	0.00376288	0.0544352	0.00253844	0.0381478	0.00973032
179	408	Effect of arbuscular mycorrhizal fungi (Glomus spp.) on growth and arsenic uptake of vetiver grass (Chrysopogon zizanioides L.) from contaminated soil and water systems	2014		Sandy	No_P_deficient	Acidic	Chrysopogon zizanioides	Poaceae	Fibrous	Perennial	28	3		>1	Mixed	Mixed	Mixed	0.627949	-0.0753652	0.0025462	0.313713	0.00531979	0.093078	0.0046455
180	409	Effect of arbuscular mycorrhizal fungi on aggregate stability of a clay soil inoculating with two different host plants	2014	1_2.9	No_sandy	No_P_deficient	Acidic	Solanum lycopersicum	Solanaceae	Fibrous	Annual	30	4	23.5	1	Funneliformis mosseae	Glomeraceae	Rhizophilic guild	0.155985	-0.0432433	0.028786	-0.0806889	0.0134121	-0.048215	0.026379
180	410	Effect of arbuscular mycorrhizal fungi on aggregate stability of a clay soil inoculating with two different host plants	2014	1_2.9	No_sandy	No_P_deficient	Acidic	Zea mays	Poaceae	Fibrous	Annual	30	4	14.5	1	Funneliformis mosseae	Glomeraceae	Rhizophilic guild	0.109489	0.116972	0.0213339	0.0645385	0.0187891	0.111918	0.0210457
181	411	Effect of Arbuscular Mycorrhizal Fungi on Switchgrass Growth and Mineral Nutrition in Cadmium-Contaminated Soil	2018	1_2.9	No_sandy		Neutral	Panicum virgatum	Poaceae	Fibrous	Annual	63	3	78	1	Rhizophagus irregularis	Glomeraceae	Rhizophilic guild	0.77953	1.42538	0.02369	1.29928	0.0432633	1.37209	0.0281813
182	412	Effect of arbuscular mycorrhizal fungi on uptake of selenate, selenite, and selenomethionine by roots of winter wheat	2019	>2.9	Sandy	P_deficent	Alkaline	Triticum aestivum	Poaceae	Fibrous	Annual	56	4	83.1	1	Diversispora versiformis	Diversisporaceae	Edaphophilic guild	0.483871	0.0239055	0.00288141	-0.333144	0.000204653	-0.0791373	0.00175854
182	413	Effect of arbuscular mycorrhizal fungi on uptake of selenate, selenite, and selenomethionine by roots of winter wheat	2019	>2.9	Sandy	P_deficent	Alkaline	Triticum aestivum	Poaceae	Fibrous	Annual	56	4	80	1	Funneliformis mosseae	Glomeraceae	Rhizophilic guild	0.483871	0.0160003	0.00389348	-0.310155	0.000198577	-0.0791373	0.00235543
183	414	Effect of arbuscular mycorrhizal fungus (Glomus caledonium) on the accumulation and metabolism of atrazine in maize (Zea mays L.) and atrazine dissipation in soil	2007	<1	No_sandy	P_deficent	Neutral	Zea mays	Poaceae	Fibrous	Annual	70	4	68.1	1	Funneliformis caledonium	Glomeraceae	Rhizophilic guild	1.0559	-0.0315484	0.000798475	0.237936	0.00172743	0.115879	0.00126446
184	415	Effect of Arbuscular Mycorrhizal Fungus (Glomus Mosseae) and Soil Yeasts Interaction on Root Nodulation, N-Fixation and Growth of Faba Bean (Vichia faba)	2015	>2.9	Sandy	P_deficent	Alkaline	Vicia faba	Fabaceae	Fibrous	Annual	42	6	46	1	Funneliformis mosseae	Glomeraceae	Rhizophilic guild	0.68	0.385262	0.00333333	0.223144	0.00333333	0.322773	0.00333333
185	416	Effect of Arbuscular Mycorrhizal Inoculations on Seedling Growth and Biomass Productivity of Two Bamboo Species	2012	>2.9	Sandy			Bambusa bambos	Poaceae	Taproot	Perennial	120	4		1	Acaulospora mellea	Acaulosporaceae	Ancestral guild	0.666667	0.524071	0.005	0.0327898	0.005	0.355341	0.005
185	417	Effect of Arbuscular Mycorrhizal Inoculations on Seedling Growth and Biomass Productivity of Two Bamboo Species	2012	>2.9	Sandy			Bambusa bambos	Poaceae	Taproot	Perennial	120	4		1	Acaulospora scrobiculata	Acaulosporaceae	Ancestral guild	0.666667	0.562785	0.005	0.587787	0.005	0.572861	0.005
185	418	Effect of Arbuscular Mycorrhizal Inoculations on Seedling Growth and Biomass Productivity of Two Bamboo Species	2012	>2.9	Sandy			Bambusa bambos	Poaceae	Taproot	Perennial	120	4		1	Glomus aggregatum	Glomeraceae	Rhizophilic guild	0.666667	0.647685	0.005	0.427444	0.005	0.565314	0.005
185	419	Effect of Arbuscular Mycorrhizal Inoculations on Seedling Growth and Biomass Productivity of Two Bamboo Species	2012	>2.9	Sandy			Bambusa bambos	Poaceae	Taproot	Perennial	120	4		1	Glomus arborense	Glomeraceae	Rhizophilic guild	0.666667	0.600057	0.005	0.360003	0.005	0.510826	0.005
185	420	Effect of Arbuscular Mycorrhizal Inoculations on Seedling Growth and Biomass Productivity of Two Bamboo Species	2012	>2.9	Sandy			Bambusa bambos	Poaceae	Taproot	Perennial	120	4		1	Glomus cerebriforme	Glomeraceae	Rhizophilic guild	0.666667	0.911836	0.005	1.1314	0.005	1.00552	0.005
185	421	Effect of Arbuscular Mycorrhizal Inoculations on Seedling Growth and Biomass Productivity of Two Bamboo Species	2012	>2.9	Sandy			Bambusa bambos	Poaceae	Taproot	Perennial	120	4		1	Glomus diaphanum	Glomeraceae	Rhizophilic guild	0.666667	1.04537	0.005	0.312375	0.005	0.812411	0.005
185	422	Effect of Arbuscular Mycorrhizal Inoculations on Seedling Growth and Biomass Productivity of Two Bamboo Species	2012	>2.9	Sandy			Bambusa bambos	Poaceae	Taproot	Perennial	120	4		1	Claroideoglomus etunicatum	Claroideoglomeraceae	Rhizophilic guild	0.666667	0.670674	0.005	0.81831	0.005	0.732368	0.005
185	423	Effect of Arbuscular Mycorrhizal Inoculations on Seedling Growth and Biomass Productivity of Two Bamboo Species	2012	>2.9	Sandy			Bambusa bambos	Poaceae	Taproot	Perennial	120	4		1	Rhizophagus fasciculatus	Glomeraceae	Rhizophilic guild	0.666667	0.587787	0.005	0.0645385	0.005	0.4099	0.005
185	424	Effect of Arbuscular Mycorrhizal Inoculations on Seedling Growth and Biomass Productivity of Two Bamboo Species	2012	>2.9	Sandy			Bambusa bambos	Poaceae	Taproot	Perennial	120	4		1	Glomus hoi	Glomeraceae	Rhizophilic guild	0.666667	0.788457	0.005	0.312375	0.005	0.624154	0.005
185	425	Effect of Arbuscular Mycorrhizal Inoculations on Seedling Growth and Biomass Productivity of Two Bamboo Species	2012	>2.9	Sandy			Bambusa bambos	Poaceae	Taproot	Perennial	120	4		1	Rhizophagus intraradices	Glomeraceae	Rhizophilic guild	0.666667	0.778305	0.005	0.470004	0.005	0.666119	0.005
185	426	Effect of Arbuscular Mycorrhizal Inoculations on Seedling Growth and Biomass Productivity of Two Bamboo Species	2012	>2.9	Sandy			Bambusa bambos	Poaceae	Taproot	Perennial	120	4		1	Paraglomus occultum	Paraglomeraceae	Rhizophilic guild	0.666667	0.470004	0.005	0.490623	0.005	0.478302	0.005
185	427	Effect of Arbuscular Mycorrhizal Inoculations on Seedling Growth and Biomass Productivity of Two Bamboo Species	2012	>2.9	Sandy			Bambusa bambos	Poaceae	Taproot	Perennial	120	4		1	Glomus sp.	Glomeraceae	Rhizophilic guild	0.666667	-0.0454624	0.005	-0.310155	0.005	-0.143101	0.005
185	428	Effect of Arbuscular Mycorrhizal Inoculations on Seedling Growth and Biomass Productivity of Two Bamboo Species	2012	>2.9	Sandy			Dendrocalamus strictus	Poaceae	Taproot	Perennial	120	4		1	Acaulospora mellea	Acaulosporaceae	Ancestral guild	0.315789	0.373377	0.005	0.659246	0.005	0.449801	0.005
185	429	Effect of Arbuscular Mycorrhizal Inoculations on Seedling Growth and Biomass Productivity of Two Bamboo Species	2012	>2.9	Sandy			Dendrocalamus strictus	Poaceae	Taproot	Perennial	120	4		1	Acaulospora scrobiculata	Acaulosporaceae	Ancestral guild	0.315789	0.456758	0.005	0.902868	0.005	0.583332	0.005
185	430	Effect of Arbuscular Mycorrhizal Inoculations on Seedling Growth and Biomass Productivity of Two Bamboo Species	2012	>2.9	Sandy			Dendrocalamus strictus	Poaceae	Taproot	Perennial	120	4		1	Glomus aggregatum	Glomeraceae	Rhizophilic guild	0.315789	0.456758	0.005	0.659246	0.005	0.509224	0.005
185	431	Effect of Arbuscular Mycorrhizal Inoculations on Seedling Growth and Biomass Productivity of Two Bamboo Species	2012	>2.9	Sandy			Dendrocalamus strictus	Poaceae	Taproot	Perennial	120	4		1	Glomus arborense	Glomeraceae	Rhizophilic guild	0.315789	0.373377	0.005	0.550046	0.005	0.41871	0.005
185	432	Effect of Arbuscular Mycorrhizal Inoculations on Seedling Growth and Biomass Productivity of Two Bamboo Species	2012	>2.9	Sandy			Dendrocalamus strictus	Poaceae	Taproot	Perennial	120	4		1	Glomus cerebriforme	Glomeraceae	Rhizophilic guild	0.315789	0.456758	0.005	0.757686	0.005	0.537662	0.005
185	433	Effect of Arbuscular Mycorrhizal Inoculations on Seedling Growth and Biomass Productivity of Two Bamboo Species	2012	>2.9	Sandy			Dendrocalamus strictus	Poaceae	Taproot	Perennial	120	4		1	Glomus diaphanum	Glomeraceae	Rhizophilic guild	0.315789	0.380597	0.005	0.182322	0.005	0.336472	0.005
185	434	Effect of Arbuscular Mycorrhizal Inoculations on Seedling Growth and Biomass Productivity of Two Bamboo Species	2012	>2.9	Sandy			Dendrocalamus strictus	Poaceae	Taproot	Perennial	120	4		1	Claroideoglomus etunicatum	Claroideoglomeraceae	Rhizophilic guild	0.315789	0.216808	0.005	0.587787	0.005	0.319181	0.005
185	435	Effect of Arbuscular Mycorrhizal Inoculations on Seedling Growth and Biomass Productivity of Two Bamboo Species	2012	>2.9	Sandy			Dendrocalamus strictus	Poaceae	Taproot	Perennial	120	4		1	Rhizophagus fasciculatus	Glomeraceae	Rhizophilic guild	0.315789	0.328925	0.005	0.803495	0.005	0.464991	0.005
185	436	Effect of Arbuscular Mycorrhizal Inoculations on Seedling Growth and Biomass Productivity of Two Bamboo Species	2012	>2.9	Sandy			Dendrocalamus strictus	Poaceae	Taproot	Perennial	120	4		1	Glomus hoi	Glomeraceae	Rhizophilic guild	0.315789	0.336472	0.005	0.67634	0.005	0.429182	0.005
185	437	Effect of Arbuscular Mycorrhizal Inoculations on Seedling Growth and Biomass Productivity of Two Bamboo Species	2012	>2.9	Sandy			Dendrocalamus strictus	Poaceae	Taproot	Perennial	120	4		1	Rhizophagus intraradices	Glomeraceae	Rhizophilic guild	0.315789	0.463403	0.005	0.709676	0.005	0.528273	0.005
185	438	Effect of Arbuscular Mycorrhizal Inoculations on Seedling Growth and Biomass Productivity of Two Bamboo Species	2012	>2.9	Sandy			Dendrocalamus strictus	Poaceae	Taproot	Perennial	120	4		1	Paraglomus occultum	Paraglomeraceae	Rhizophilic guild	0.315789	0.394883	0.005	0.530628	0.005	0.429182	0.005
185	439	Effect of Arbuscular Mycorrhizal Inoculations on Seedling Growth and Biomass Productivity of Two Bamboo Species	2012	>2.9	Sandy			Dendrocalamus strictus	Poaceae	Taproot	Perennial	120	4		1	Glomus sp.	Glomeraceae	Rhizophilic guild	0.315789	0.443335	0.005	0.659246	0.005	0.499562	0.005
186	440	Effect of Constant and Diurnally Fluctuating Temperatures on Arbuscular Mycorrhizal Fungus Infection and the Growth of Infected Asparagus (Asparagus officinalis L.) Seedlings	1996	>2.9		No_P_deficient	Neutral	Asparagus officinalis	Other	Fibrous	Perennial	56	10	26.8	1	Claroideoglomus etunicatum	Claroideoglomeraceae	Rhizophilic guild	0.903226	-0.0495969	0.002	0.101783	0.002	0.0251059	0.002
186	441	Effect of Constant and Diurnally Fluctuating Temperatures on Arbuscular Mycorrhizal Fungus Infection and the Growth of Infected Asparagus (Asparagus officinalis L.) Seedlings	1996	>2.9		No_P_deficient	Neutral	Asparagus officinalis	Other	Fibrous	Perennial	56	10	20.2	1	Gigaspora margarita	Gigasporaceae	Edaphophilic guild	0.903226	0.0160003	0.002	0.194156	0.002	0.104513	0.002
187	442	Effect of Different Amendments on Growing of Canna indica L. Inoculated with AMF on Mining Substrate	2014	<1	Sandy	No_P_deficient	Neutral	Canna indica	Other	Taproot	Perennial	180	3	22	>1	Mixed	Mixed	Mixed	0.702857	1.11748	0.0354213	0.983873	0.198505	1.06448	0.0814337
187	443	Effect of Different Amendments on Growing of Canna indica L. Inoculated with AMF on Mining Substrate	2014	<1	Sandy	No_P_deficient	Neutral	Canna indica	Other	Taproot	Perennial	180	3	24.5	>1	Mixed	Mixed	Mixed	0.702857	0.977251	0.0690215	0.709277	0.205246	0.875189	0.105253
188	444	Effect of Different Arbuscular Mycorrhizal Fungi on Growth and Physiology of Maize at Ambient and Low Temperature Regimes	2014	1_2.9	Sandy	No_P_deficient	Neutral	Zea mays	Poaceae	Fibrous	Annual	35	5	39	1	Acaulospora scrobiculata	Acaulosporaceae	Ancestral guild	0.241379	0.0666914	0.0169073	-0.074108	0.0110192	0.040822	0.0110522
188	445	Effect of Different Arbuscular Mycorrhizal Fungi on Growth and Physiology of Maize at Ambient and Low Temperature Regimes	2014	1_2.9	Sandy	No_P_deficient	Neutral	Zea mays	Poaceae	Fibrous	Annual	35	5	57	1	Claroideoglomus etunicatum	Claroideoglomeraceae	Rhizophilic guild	0.241379	0.0170944	0.0286424	0	0.0102041	0.0137933	0.0186471
188	446	Effect of Different Arbuscular Mycorrhizal Fungi on Growth and Physiology of Maize at Ambient and Low Temperature Regimes	2014	1_2.9	Sandy	No_P_deficient	Neutral	Zea mays	Poaceae	Fibrous	Annual	35	5	33	1	Rhizophagus intraradices	Glomeraceae	Rhizophilic guild	0.241379	0.0984401	0.0265289	-0.074108	0.0110192	0.0671393	0.0202466
188	447	Effect of Different Arbuscular Mycorrhizal Fungi on Growth and Physiology of Maize at Ambient and Low Temperature Regimes	2014	1_2.9	Sandy	No_P_deficient	Neutral	Zea mays	Poaceae	Fibrous	Annual	35	5	51	1	Glomus tortuosum	Glomeraceae	Rhizophilic guild	0.241379	0.27029	0.0207987	0.133531	0.00900829	0.245122	0.0152414
189	448	Effect of earthworms and arbuscular mycorrhizal fungi on the microbial community and maize growth under salt stress	2016	1_2.9	No_sandy	P_deficent	Alkaline	Zea mays	Poaceae	Fibrous	Annual	42	10	85	1	Funneliformis mosseae	Glomeraceae	Rhizophilic guild	0.184211	1.86265	0.00128656	1.20039	0.0203928	1.78432	0.00207818
190	449	Effect of excess zinc and arbuscular mycorrhizal fungus on bioproduction and trace element nutrition of Tomato ( Solanum lycopersicum L. cv. Micro-Tom)	2018	<1	Sandy		Alkaline	Solanum lycopersicum	Solanaceae	Fibrous	Annual	70	5	45	1	Rhizophagus irregularis	Glomeraceae	Rhizophilic guild	0.4315	0.14035	0.0214895	-0.111619	0.0125378	0.0708515	0.0185435
191	450	Effect of fungicides on association of arbuscular mycorrhiza fungus Rhizophagus fasciculatus and growth of Proso millet (Panicum miliaceum L.)	2014	>2.9	No_sandy	No_P_deficient	Neutral	Panicum miliaceum	Poaceae	Fibrous	Annual	60	3	61.3	1	Rhizophagus fasciculatus	Glomeraceae	Rhizophilic guild	0.111111	0.870828	0.170705	1.60944	0.5525	0.97456	0.200789
192	451	Effect of Funneliformis mosseae on the growth, cadmium accumulation and antioxidant activities of Solanum nigrum	2016	1_2.9	No_sandy	No_P_deficient	Neutral	Solanum nigrum	Solanaceae	Fibrous	Annual	70	5	72	1	Funneliformis mosseae	Glomeraceae	Rhizophilic guild	0.3857	0.189512	0.000974853	0.247987	0.00219207	0.206134	0.00126922
193	452	Effect of genotype of Trifolium repens on mycorrhizal symbiosis with Glomus mosseae	2001	<1	Sandy			Trifolium repens	Fabaceae	Fibrous	Perennial	61	4	14.335	1	Funneliformis mosseae	Glomeraceae	Rhizophilic guild	0.170681	-0.0168188	0.0173538	-0.0493834	0.0324905	-0.0215011	0.0188737
194	453	Effect of Glomus etunicatum Inoculation on Aluminum, Phosphorus, Calcium, and Magnesium Uptake of Two Barley Genotypes with Different Aluminum Tolerance	1998	<1	Sandy			Hordeum vulgare	Poaceae	Fibrous	Annual	60	5	55.95	1	Claroideoglomus etunicatum	Claroideoglomeraceae	Rhizophilic guild	0.755958	0.505592	0.00750424	0.113186	0.0379175	0.355082	0.0159438
195	454	Effect of Glomus intraradices isolated from Pb-contaminated soil on Pb uptake by Agrostis capillaris is changed by its cultivation in a metal-free substrate	2003	1_2.9	Sandy	No_P_deficient	Acidic	Agrostis capillaris	Poaceae	Fibrous	Perennial	140	6	17	1	Rhizophagus intraradices	Glomeraceae	Rhizophilic guild	1.34483	-0.109199	0.00333333	-0.108214	0.00333333	-0.108634	0.00333333
195	455	Effect of Glomus intraradices isolated from Pb-contaminated soil on Pb uptake by Agrostis capillaris is changed by its cultivation in a metal-free substrate	2003	1_2.9	Sandy	No_P_deficient	Acidic	Agrostis capillaris	Poaceae	Fibrous	Perennial	140	6	66	1	Rhizophagus intraradices	Glomeraceae	Rhizophilic guild	1.34483	-0.371564	0.00333333	-0.485508	0.00333333	-0.435318	0.00333333
195	456	Effect of Glomus intraradices isolated from Pb-contaminated soil on Pb uptake by Agrostis capillaris is changed by its cultivation in a metal-free substrate	2003	1_2.9	Sandy	No_P_deficient	Acidic	Agrostis capillaris	Poaceae	Fibrous	Perennial	140	6	24	1	Rhizophagus intraradices	Glomeraceae	Rhizophilic guild	2.75	-0.693147	0.00333333	-1.0116	0.00333333	-0.916291	0.00333333
195	457	Effect of Glomus intraradices isolated from Pb-contaminated soil on Pb uptake by Agrostis capillaris is changed by its cultivation in a metal-free substrate	2003	1_2.9	Sandy	No_P_deficient	Acidic	Agrostis capillaris	Poaceae	Fibrous	Perennial	140	6	35	1	Rhizophagus intraradices	Glomeraceae	Rhizophilic guild	2.75	-0.287682	0.00333333	-0.451985	0.00333333	-0.405465	0.00333333
196	458	Effect of Glomus mosseae on concentrations of rosmarinic and caffeic acids and essential oil compounds in basil inoculated with Fusarium oxysporum f.sp. basilici	2008	<1	No_sandy			Ocimum basilicum	Other	Taproot	Annual	70	5	58	1	Funneliformis mosseae	Glomeraceae	Rhizophilic guild	0.393256	0.42094	0.00814989	0.486041	0.0149179	0.439749	0.00986601
197	459	Effect of indigenous arbuscular - mycorrhiza (Glomus spp) on apple (Malus domestica) seedlings grown in replant disease soil	2013	>2.9	No_sandy			Malus domestica	Other	Taproot	Perennial	90	5	11.24	1	Glomus macrocarpum	Glomeraceae	Rhizophilic guild	0.279279	0.70657	0.004	1.17118	0.004	0.827998	0.004
197	460	Effect of indigenous arbuscular - mycorrhiza (Glomus spp) on apple (Malus domestica) seedlings grown in replant disease soil	2014	>2.9	No_sandy			Malus domestica	Other	Taproot	Perennial	90	5	13	1	Rhizophagus fasciculatus	Glomeraceae	Rhizophilic guild	0.279279	0.795801	0.004	1.39433	0.004	0.960375	0.004
197	461	Effect of indigenous arbuscular - mycorrhiza (Glomus spp) on apple (Malus domestica) seedlings grown in replant disease soil	2015	>2.9	No_sandy			Malus domestica	Other	Taproot	Perennial	90	5	11.48	1	Funneliformis mosseae	Glomeraceae	Rhizophilic guild	0.279279	0.75853	0.004	1.39433	0.004	0.935817	0.004
197	462	Effect of indigenous arbuscular - mycorrhiza (Glomus spp) on apple (Malus domestica) seedlings grown in replant disease soil	2016	>2.9	No_sandy			Malus domestica	Other	Taproot	Perennial	90	5	9.64	1	Gigaspora albida	Gigasporaceae	Edaphophilic guild	0.279279	0.55316	0.004	1.28451	0.004	0.764485	0.004
197	463	Effect of indigenous arbuscular - mycorrhiza (Glomus spp) on apple (Malus domestica) seedlings grown in replant disease soil	2017	>2.9	No_sandy			Malus domestica	Other	Taproot	Perennial	90	5	9.04	1	Acaulospora bireticulata	Acaulosporaceae	Ancestral guild	0.279279	0.165667	0.004	0.693147	0.004	0.306863	0.004
198	464	Effect of Inoculation with Arbuscular Mycorrhizal Fungus on Nitrogen and Phosphorus Utilization in Upland Rice-Mungbean Intercropping System	2010	>2.9	Sandy	P_deficent	Alkaline	Oryza sativa	Poaceae	Fibrous	Annual	45	4	10.36	>1	Mixed	Mixed	Mixed	0.345455	-0.115513	0.005	0.146603	0.005	-0.0413852	0.005
198	465	Effect of Inoculation with Arbuscular Mycorrhizal Fungus on Nitrogen and Phosphorus Utilization in Upland Rice-Mungbean Intercropping System	2010	>2.9	Sandy	P_deficent	Alkaline	Vigna radiata	Fabaceae	Taproot	Annual	45	4	80.3	>1	Mixed	Mixed	Mixed	0.380282	0.884815	0.005	0.87855	0.005	0.883093	0.005
199	466	Effect of Inoculation with Glomus versiforme on Cadmium Accumulation, Antioxidant Activities and Phytochelatins of Solanum photeinocarpum	2015	1_2.9	No_sandy	No_P_deficient	Neutral	Solanum photeinocarpum	Solanaceae	Fibrous	Annual	70	5	89	1	Diversispora versiformis	Diversisporaceae	Edaphophilic guild	2.48716	-0.885344	0.00350101	-1.0807	0.00148405	-1.02067	0.00201336
200	467	Effect of Inoculation with Mycorrhizal Fungi on Growth and Nutrient Uptake of Grapevine Genotypes (Vitis spp.)	2010	>2.9	No_sandy	No_P_deficient		Vitis berlandieri	Other	Taproot	Perennial	60	3	66.594	1	Funneliformis mosseae	Glomeraceae	Rhizophilic guild	0.808012	0.33411	0.00723678	0.0395765	0.0355193	0.213055	0.0156234
200	468	Effect of Inoculation with Mycorrhizal Fungi on Growth and Nutrient Uptake of Grapevine Genotypes (Vitis spp.)	2010	>2.9	No_sandy	No_P_deficient		Vitis berlandieri	Other	Taproot	Perennial	60	3	69.3555	1	Rhizophagus intraradices	Glomeraceae	Rhizophilic guild	0.808012	0.0300024	0.00852864	-0.120378	0.0240253	-0.0344259	0.0143714
200	469	Effect of Inoculation with Mycorrhizal Fungi on Growth and Nutrient Uptake of Grapevine Genotypes (Vitis spp.)	2010	>2.9	No_sandy	No_P_deficient		Vitis solonis	Other	Taproot	Perennial	60	3	95.2128	1	Funneliformis mosseae	Glomeraceae	Rhizophilic guild	1.47253	0.43389	0.00980638	0.0179435	0.0122678	0.207418	0.0102647
200	470	Effect of Inoculation with Mycorrhizal Fungi on Growth and Nutrient Uptake of Grapevine Genotypes (Vitis spp.)	2010	>2.9	No_sandy	No_P_deficient		Vitis solonis	Other	Taproot	Perennial	60	3	83.5033	1	Rhizophagus intraradices	Glomeraceae	Rhizophilic guild	1.47253	0.226905	0.00301383	0.180118	0.0116737	0.199305	0.00718576
200	471	Effect of Inoculation with Mycorrhizal Fungi on Growth and Nutrient Uptake of Grapevine Genotypes (Vitis spp.)	2010	>2.9	No_sandy	No_P_deficient		Vitis vinifera	Other	Taproot	Perennial	60	3	89.0719	1	Funneliformis mosseae	Glomeraceae	Rhizophilic guild	0.389044	-0.0515349	0.0352169	-0.0264554	0.0835482	-0.0444469	0.0468352
200	472	Effect of Inoculation with Mycorrhizal Fungi on Growth and Nutrient Uptake of Grapevine Genotypes (Vitis spp.)	2010	>2.9	No_sandy	No_P_deficient		Vitis vinifera	Other	Taproot	Perennial	60	3	90.0231	1	Rhizophagus intraradices	Glomeraceae	Rhizophilic guild	0.389044	0.233379	0.0131978	0.685209	0.0336216	0.38178	0.0184793
200	473	Effect of Inoculation with Mycorrhizal Fungi on Growth and Nutrient Uptake of Grapevine Genotypes (Vitis spp.)	2010	>2.9	No_sandy	No_P_deficient		Vitis vinifera	Other	Taproot	Perennial	60	3	66.0986	1	Funneliformis mosseae	Glomeraceae	Rhizophilic guild	0.561059	0.317651	0.0139686	0.434119	0.0366632	0.361088	0.0210935
200	474	Effect of Inoculation with Mycorrhizal Fungi on Growth and Nutrient Uptake of Grapevine Genotypes (Vitis spp.)	2010	>2.9	No_sandy	No_P_deficient		Vitis vinifera	Other	Taproot	Perennial	60	3	85.8705	1	Rhizophagus intraradices	Glomeraceae	Rhizophilic guild	0.561059	0.298531	0.0117364	0.846482	0.0383801	0.531437	0.020919
201	475	Effect of microbial inoculation and EDTA on the uptake and translocation of heavy metal by corn and sunflower	2009	>2.9	Sandy		Neutral	Helianthus annuus	Asteraceae	Taproot	Annual	60	3		1	Funneliformis mosseae	Glomeraceae	Rhizophilic guild	0.0822469	0.359779	0.0144313	0.705527	0.0223774	0.390687	0.0149525
201	476	Effect of microbial inoculation and EDTA on the uptake and translocation of heavy metal by corn and sunflower	2009	>2.9	Sandy		Neutral	Zea mays	Poaceae	Fibrous	Annual	60	3		1	Funneliformis mosseae	Glomeraceae	Rhizophilic guild	0.440995	1.00496	0.00259391	0.429249	0.00127624	0.861149	0.00220771
202	477	Effect of Mycorrhizal Colonization and Light Limitation on Growth and Reproduction of Lima Bean (Phaseolus lunatus L.)	2014	<1				Phaseolus lunatus	Fabaceae	Taproot	Annual	42	15	6.4	>1	Mixed	Mixed	Mixed	0.378684	0.115378	0.00320772	-0.222163	0.00565714	0.0334222	0.00361446
203	478	Effect of mycorrhizal inoculation on growth, nitrogen fi xation, and nutrient uptake in Cicer arietinum (L.) under salt stress	2009	>2.9	Sandy	No_P_deficient	Neutral	Cicer arietinum	Fabaceae	Taproot	Annual	80	3	93.57	1	Funneliformis mosseae	Glomeraceae	Rhizophilic guild	0.28648	0.223904	0.00666667	0.216553	0.00666667	0.222272	0.00666667
203	479	Effect of mycorrhizal inoculation on growth, nitrogen fi xation, and nutrient uptake in Cicer arietinum (L.) under salt stress	2009	>2.9	Sandy	No_P_deficient	Neutral	Cicer arietinum	Fabaceae	Taproot	Annual	80	3	79.97	1	Funneliformis mosseae	Glomeraceae	Rhizophilic guild	0.3111	0.11749	0.00666667	0.1046	0.00666667	0.114447	0.00666667
204	480	Effect of Mycorrhizal Inoculation on Nutrient Acquisition, Gas Exchange, and Nitrate Reductase Activity of Two Mediterranean-Autochthonous Shrub Species Under Drought Stress	2007		Sandy			Olea europaea	Other	Taproot	Perennial	72	5	55	>1	Mixed	Claroideoglomeraceae	Rhizophilic guild	2.76923	0.268264	0.004	0.130053	0.004	0.168623	0.004
204	481	Effect of Mycorrhizal Inoculation on Nutrient Acquisition, Gas Exchange, and Nitrate Reductase Activity of Two Mediterranean-Autochthonous Shrub Species Under Drought Stress	2007		Sandy			Olea europaea	Other	Taproot	Perennial	72	5	59	1	Claroideoglomus claroideum	Claroideoglomeraceae	Rhizophilic guild	2.76923	0.570545	0.004	0.423814	0.004	0.464889	0.004
204	482	Effect of Mycorrhizal Inoculation on Nutrient Acquisition, Gas Exchange, and Nitrate Reductase Activity of Two Mediterranean-Autochthonous Shrub Species Under Drought Stress	2007		Sandy			Retama sphaerocarpa	Fabaceae	Taproot	Perennial	72	5	52	>1	Mixed	Claroideoglomeraceae	Rhizophilic guild	5.41667	0.0800427	0.004	-0.262364	0.004	-0.200671	0.004
204	483	Effect of Mycorrhizal Inoculation on Nutrient Acquisition, Gas Exchange, and Nitrate Reductase Activity of Two Mediterranean-Autochthonous Shrub Species Under Drought Stress	2007		Sandy			Retama sphaerocarpa	Fabaceae	Taproot	Perennial	72	5	46	1	Claroideoglomus claroideum	Claroideoglomeraceae	Rhizophilic guild	5.41667	0	0.004	-0.460815	0.004	-0.373514	0.004
205	484	Effect of mycorrhization on the isoflavone content and the phytoestrogen activity of red clover	2007	<1	No_sandy			Trifolium pratense	Fabaceae	Fibrous	Perennial	102	3	78	1	Funneliformis mosseae	Glomeraceae	Rhizophilic guild	2.62687	0.812587	0.00666667	0.218588	0.00666667	0.420442	0.00666667
206	485	Effect of plant nitrogen status on the contribution of arbuscular mycorrhizal hyphae to plant nitrogen uptake	1999	1_2.9	Sandy			Triticum aestivum	Poaceae	Fibrous	Annual	49	4	84.8	1	Funneliformis mosseae	Glomeraceae	Rhizophilic guild	0.832258	0.149532	0.00321107	-0.0976385	0.00384672	0.0447579	0.00303864
207	486	Effect of salinity and arbuscular mycorrhizal fungi on growth and some physiological parameters of Citrus jambheri	2013	>2.9	No_sandy	No_P_deficient	Alkaline	Citrus jambhiri	Rutaceae	Taproot	Perennial	150	3	74	1	Rhizophagus intraradices	Glomeraceae	Rhizophilic guild	0.476896	0.229684	0.0404816	0.380466	0.0342321	0.280901	0.038062
207	487	Effect of salinity and arbuscular mycorrhizal fungi on growth and some physiological parameters of Citrus jambheri	2013	>2.9	No_sandy	No_P_deficient	Alkaline	Citrus jambhiri	Rutaceae	Taproot	Perennial	150	3	67	1	Claroideoglomus etunicatum	Claroideoglomeraceae	Rhizophilic guild	0.476896	0.139041	0.047857	0.320897	0.0295305	0.201453	0.0412257
208	488	Effect of Selected Mycorrhizal Inoculation on Phosphorus Sustainability in Sterile and Non-sterile Soils in the Harran Plain in South Anatolia	2003	>2.9	No_sandy	No_P_deficient	Alkaline	Zea mays	Poaceae	Fibrous	Annual	45	5	70	1	Claroideoglomus etunicatum	Claroideoglomeraceae	Rhizophilic guild	0.722222	1.6614	0.207162	1.69208	0.475941	1.67438	0.306331
208	489	Effect of Selected Mycorrhizal Inoculation on Phosphorus Sustainability in Sterile and Non-sterile Soils in the Harran Plain in South Anatolia	2003	>2.9	No_sandy	No_P_deficient	Alkaline	Zea mays	Poaceae	Fibrous	Annual	45	5	84	1	Funneliformis caledonium	Glomeraceae	Rhizophilic guild	0.722222	1.85282	0.224356	1.9994	0.47372	1.91692	0.310965
208	490	Effect of Selected Mycorrhizal Inoculation on Phosphorus Sustainability in Sterile and Non-sterile Soils in the Harran Plain in South Anatolia	2003	>2.9	No_sandy	No_P_deficient	Alkaline	Zea mays	Poaceae	Fibrous	Annual	45	5	66	1	Funneliformis mosseae	Glomeraceae	Rhizophilic guild	0.722222	1.64223	0.210996	1.80196	0.482463	1.71234	0.311342
209	491	Effect of Superphosphate and Arbuscular Mycorrhizal Fungus Glomus mosseae on Phosphorus and Arsenic Uptake in Lentil ( Lens culinaris L.)	2011	1_2.9	Sandy			Lens culinaris	Fabaceae	Taproot	Annual	70	4	44	1	Funneliformis mosseae	Glomeraceae	Rhizophilic guild	0.994805	-0.792606	0.004982	-1.02682	0.0103347	-0.902567	0.00723394
210	492	Effect of the arbuscular mycorrhizal symbiosis upon uptake of cesium and other cations by plants	2001	<1	No_sandy			Agrostis tenuis	Poaceae	Fibrous	Perennial	70	8	62	1	Funneliformis mosseae	Glomeraceae	Rhizophilic guild	0.787487	-0.523855	0.00309292	-0.508545	0.00895871	-0.517081	0.00529337
211	493	Effect of the saprophytic fungus Fusarium oxysporum on arbuscular mycorrhizal colonization and growth of plants in greenhouse and ?eld trials	2000	<1	No_sandy	P_deficent	Alkaline	Pisum sativum	Fabaceae	Taproot	Annual	56	5	48	1	Funneliformis mosseae	Glomeraceae	Rhizophilic guild	0.72973	0.183322	0.004	0.253142	0.004	0.213374	0.004
211	494	Effect of the saprophytic fungus Fusarium oxysporum on arbuscular mycorrhizal colonization and growth of plants in greenhouse and ?eld trials	2000	<1	No_sandy	P_deficent	Alkaline	Pisum sativum	Fabaceae	Taproot	Annual	56	5	21	1	Rhizophagus fasciculatus	Glomeraceae	Rhizophilic guild	0.72973	-0.10436	0.004	0.256332	0.004	0.0638873	0.004
211	495	Effect of the saprophytic fungus Fusarium oxysporum on arbuscular mycorrhizal colonization and growth of plants in greenhouse and ?eld trials	2000	<1	No_sandy	P_deficent	Alkaline	Pisum sativum	Fabaceae	Taproot	Annual	56	5	76	1	Rhizophagus intraradices	Glomeraceae	Rhizophilic guild	0.72973	0.190794	0.004	0.187111	0.004	0.189242	0.004
211	496	Effect of the saprophytic fungus Fusarium oxysporum on arbuscular mycorrhizal colonization and growth of plants in greenhouse and ?eld trials	2000	<1	No_sandy	P_deficent	Alkaline	Pisum sativum	Fabaceae	Taproot	Annual	56	5	83	1	Glomus deserticola	Glomeraceae	Rhizophilic guild	0.72973	0.23923	0.004	-0.0725264	0.004	0.119325	0.004
211	497	Effect of the saprophytic fungus Fusarium oxysporum on arbuscular mycorrhizal colonization and growth of plants in greenhouse and ?eld trials	2000	<1	No_sandy	P_deficent	Alkaline	Pisum sativum	Fabaceae	Taproot	Annual	56	5	6	1	Rhizophagus clarus	Glomeraceae	Rhizophilic guild	0.72973	0.113436	0.004	-0.0506437	0.004	0.0474665	0.004
212	498	Effect of Vesicular-Arbuscular Mycorrhizal and Phosphatase-Producing Fungal Inoculation on Growth and Nutrition of White Clover Supplied with Organic Phosphorus	1995	<1	Sandy	P_deficent	Acidic	Trifolium repens	Fabaceae	Fibrous	Perennial	50	4	45	1	Funneliformis mosseae	Glomeraceae	Rhizophilic guild	0.391304	0.330242	0.005	0.575364	0.005	0.405465	0.005
212	499	Effect of Vesicular-Arbuscular Mycorrhizal and Phosphatase-Producing Fungal Inoculation on Growth and Nutrition of White Clover Supplied with Organic Phosphorus	1995	<1	Sandy	P_deficent	Acidic	Trifolium repens	Fabaceae	Fibrous	Perennial	50	4	51	1	Funneliformis mosseae	Glomeraceae	Rhizophilic guild	0.434783	0.361013	0.005	0.470004	0.005	0.395313	0.005
213	500	Effect of Vesicular-Arbuscular Mycorrhizal Fungi and of Agrobacterium radiobacter on Maize Growth	1994	<1	Sandy			Zea mays	Poaceae	Fibrous	Annual	56	6	30	1	Glomus sp.	Glomeraceae	Rhizophilic guild	0.381841	0.286749	0.00333333	0.128224	0.00333333	0.245396	0.00333333
213	501	Effect of Vesicular-Arbuscular Mycorrhizal Fungi and of Agrobacterium radiobacter on Maize Growth	1994	<1	Sandy			Zea mays	Poaceae	Fibrous	Annual	56	6	80	1	Funneliformis mosseae	Glomeraceae	Rhizophilic guild	0.381841	0.315283	0.00333333	0.0812947	0.00333333	0.255904	0.00333333
214	502	Effectiveness of arbuscular mycorrhizal fungi in the protection of olive plants against oxidative stress induced by drought	2014	<1	Sandy	P_deficent	Alkaline	Olea europaea	Other	Taproot	Perennial	120	4	57.23	1	Funneliformis mosseae	Glomeraceae	Rhizophilic guild	0.483766	0.552167	0.000642304	0.560574	0.0012341	0.554916	0.000661546
214	503	Effectiveness of arbuscular mycorrhizal fungi in the protection of olive plants against oxidative stress induced by drought	2014	<1	Sandy	P_deficent	Alkaline	Olea europaea	Other	Taproot	Perennial	120	4	63.83	1	Rhizophagus manihotis	Glomeraceae	Rhizophilic guild	0.483766	0.745333	0.00212146	0.745447	0.000410169	0.74537	0.00141064
215	504	Effects of a mycophagous Collembola on the symbioses between Trifolium subterraneum and three arbuscular mycorrhizal fungi	1996	>2.9	Sandy			Trifolium subterraneum	Fabaceae	Fibrous	Perennial	42	6		1	Funneliformis caledonium	Glomeraceae	Rhizophilic guild	0.488136	0.535601	0.00333333	0.318454	0.00333333	0.469434	0.00333333
215	505	Effects of a mycophagous Collembola on the symbioses between Trifolium subterraneum and three arbuscular mycorrhizal fungi	1996	>2.9	Sandy			Trifolium subterraneum	Fabaceae	Fibrous	Perennial	42	6		1	Rhizophagus intraradices	Glomeraceae	Rhizophilic guild	0.488136	0.599023	0.00333333	0.450722	0.00333333	0.552759	0.00333333
215	506	Effects of a mycophagous Collembola on the symbioses between Trifolium subterraneum and three arbuscular mycorrhizal fungi	1996	>2.9	Sandy			Trifolium subterraneum	Fabaceae	Fibrous	Perennial	42	6		1	Glomus invermaium	Glomeraceae	Rhizophilic guild	0.488136	0.688049	0.00333333	0.563576	0.00333333	0.648902	0.00333333
216	507	Effects of Arbuscular Mycorrhiza Fungi on Growth Characteristics of Dactylis glomerata L. under Drought Stress Conditions	2014	>2.9	Sandy	No_P_deficient	Alkaline	Dactylis glomerata	Poaceae	Fibrous	Perennial	90	5	57.5	1	Rhizophagus intraradices	Glomeraceae	Rhizophilic guild	4.60638	0.192904	0.004753	-0.494789	0.02411	-0.332306	0.0169589
216	508	Effects of Arbuscular Mycorrhiza Fungi on Growth Characteristics of Dactylis glomerata L. under Drought Stress Conditions	2014	>2.9	Sandy	No_P_deficient	Alkaline	Dactylis glomerata	Poaceae	Fibrous	Perennial	90	5	62	1	Funneliformis mosseae	Glomeraceae	Rhizophilic guild	4.60638	0.166235	0.00485839	-0.244738	0.0171932	-0.157953	0.0136622
216	509	Effects of Arbuscular Mycorrhiza Fungi on Growth Characteristics of Dactylis glomerata L. under Drought Stress Conditions	2014	>2.9	Sandy	No_P_deficient	Alkaline	Dactylis glomerata	Poaceae	Fibrous	Perennial	90	5	15	>1	Mixed	Glomeraceae	Rhizophilic guild	4.60638	0.148053	0.00493354	-0.0448718	0.0145211	-0.00761908	0.0122101
217	510	Effects of arbuscular mycorrhizal (AM) fungi on growth, essential oil production and nutrients uptake in basil	2010	>2.9	Sandy	No_P_deficient	Neutral	Ocimum basilicum	Other	Taproot	Annual	84	4	85	1	Rhizophagus fasciculatus	Glomeraceae	Rhizophilic guild	3.51579	1.41227	0.005	1.43665	0.005	1.4313	0.005
217	511	Effects of arbuscular mycorrhizal (AM) fungi on growth, essential oil production and nutrients uptake in basil	2010	>2.9	Sandy	No_P_deficient	Neutral	Ocimum basilicum	Other	Taproot	Annual	84	4	50	1	Claroideoglomus etunicatum	Claroideoglomeraceae	Rhizophilic guild	3.51579	1.26025	0.005	1.23551	0.005	1.24104	0.005
217	512	Effects of arbuscular mycorrhizal (AM) fungi on growth, essential oil production and nutrients uptake in basil	2010	>2.9	Sandy	No_P_deficient	Neutral	Ocimum basilicum	Other	Taproot	Annual	84	4	27.5	1	Rhizophagus intraradices	Glomeraceae	Rhizophilic guild	3.51579	0.93092	0.005	0.850714	0.005	0.869038	0.005
218	513	EFFECTS OF ARBUSCULAR MYCORRHIZAL FUNGI (AMF) ON Camellia sinensis (L.) O. KUNTZE UNDER GREENHOUSE CONDITIONS	2017		Sandy			Camellia sinensis	Other	Taproot	Perennial	150	6	30.4363	1	Acaulospora scrobiculata	Acaulosporaceae	Ancestral guild	0.372134	0.552947	0.00680978	0.483733	0.00677736	0.534644	0.00675301
218	514	EFFECTS OF ARBUSCULAR MYCORRHIZAL FUNGI (AMF) ON Camellia sinensis (L.) O. KUNTZE UNDER GREENHOUSE CONDITIONS	2017		Sandy			Camellia sinensis	Other	Taproot	Perennial	150	6	33.0954	1	Glomus macrocarpum	Glomeraceae	Rhizophilic guild	0.372134	0.522171	0.00319389	0.78552	0.0119481	0.600714	0.0050136
218	515	EFFECTS OF ARBUSCULAR MYCORRHIZAL FUNGI (AMF) ON Camellia sinensis (L.) O. KUNTZE UNDER GREENHOUSE CONDITIONS	2017		Sandy			Camellia sinensis	Other	Taproot	Perennial	150	6	52.405	1	Rhizophagus intraradices	Glomeraceae	Rhizophilic guild	0.372134	0.83291	0.00544053	1.28068	0.0093036	0.975435	0.00659846
218	516	EFFECTS OF ARBUSCULAR MYCORRHIZAL FUNGI (AMF) ON Camellia sinensis (L.) O. KUNTZE UNDER GREENHOUSE CONDITIONS	2017		Sandy			Camellia sinensis	Other	Taproot	Perennial	150	6	62.993	>1	Mixed	Mixed	Mixed	0.372134	0.804648	0.00326288	0.840693	0.00544281	0.814553	0.00380127
218	517	EFFECTS OF ARBUSCULAR MYCORRHIZAL FUNGI (AMF) ON Camellia sinensis (L.) O. KUNTZE UNDER GREENHOUSE CONDITIONS	2017		Sandy			Camellia sinensis	Other	Taproot	Perennial	150	6	74.0414	>1	Mixed	Mixed	Mixed	0.372134	1.01143	0.00903113	1.46704	0.0238412	1.15685	0.0134759
218	518	EFFECTS OF ARBUSCULAR MYCORRHIZAL FUNGI (AMF) ON Camellia sinensis (L.) O. KUNTZE UNDER GREENHOUSE CONDITIONS	2017		Sandy			Camellia sinensis	Other	Taproot	Perennial	150	6	58.5868	>1	Mixed	Mixed	Mixed	0.372134	0.637437	0.00778669	0.981408	0.0145453	0.743005	0.00976252
218	519	EFFECTS OF ARBUSCULAR MYCORRHIZAL FUNGI (AMF) ON Camellia sinensis (L.) O. KUNTZE UNDER GREENHOUSE CONDITIONS	2017		Sandy			Camellia sinensis	Other	Taproot	Perennial	150	6	81.5375	>1	Mixed	Mixed	Mixed	0.372134	1.19161	0.00595298	1.98084	0.00844979	1.47371	0.00675441
219	520	Effects of arbuscular mycorrhizal fungi and phosphorus fertilization on post vitro growth of micropropagated Zingiber officinale Roscoe	2010	<1	Sandy			Zingiber officinale	Other	Taproot	Perennial	150	7	81.4	1	Rhizophagus clarus	Glomeraceae	Rhizophilic guild	0.176471	1.77196	0.18645	1.89712	0.271111	1.79176	0.190625
220	521	Effects of arbuscular mycorrhizal fungi on damage by Striga hermonthica on two contrasting cultivars of sorghum, Sorghum bicolor	2001		Sandy	P_deficent	Acidic	Sorghum bicolor	Poaceae	Fibrous	Annual	80	2	75	>1	Mixed	Mixed	Mixed	0.35814	0.372365	0.00523732	0	0.000337325	0.286826	0.00332625
221	522	Effects of arbuscular mycorrhizal fungi on early development of persimmon seedlings	2018	>2.9	Sandy	P_deficent	Acidic	Diospyros kaki	Other	Taproot	Perennial	360	3	36.67	1	Gigaspora heterogama	Gigasporaceae	Edaphophilic guild	0.844828	0.91226	0.00180873	0.971217	0.0156781	0.939691	0.00645586
221	523	Effects of arbuscular mycorrhizal fungi on early development of persimmon seedlings	2018	>2.9	Sandy	P_deficent	Acidic	Diospyros kaki	Other	Taproot	Perennial	360	3	16.67	1	Claroideoglomus etunicatum	Claroideoglomeraceae	Rhizophilic guild	0.844828	0.56942	0.00972702	0.443289	0.014804	0.513625	0.0111908
221	524	Effects of arbuscular mycorrhizal fungi on early development of persimmon seedlings	2018	>2.9	Sandy	P_deficent	Acidic	Diospyros kaki	Other	Taproot	Perennial	360	3	13.33	1	Rhizophagus clarus	Glomeraceae	Rhizophilic guild	0.844828	0.474841	0.00271504	0.36261	0.0185315	0.425003	0.00800066
221	525	Effects of arbuscular mycorrhizal fungi on early development of persimmon seedlings	2018	>2.9	Sandy	P_deficent	Acidic	Diospyros kaki	Other	Taproot	Perennial	360	3	20	1	Acaulospora scrobiculata	Acaulosporaceae	Ancestral guild	0.844828	0.379263	0.00232575	0.728239	0.0097498	0.554261	0.00471494
221	526	Effects of arbuscular mycorrhizal fungi on early development of persimmon seedlings	2018	>2.9	Sandy	P_deficent	Acidic	Diospyros kaki	Other	Taproot	Perennial	360	3	26.67	1	Acaulospora morrowiae	Acaulosporaceae	Ancestral guild	0.844828	0.719381	0.00402995	0.710011	0.0111325	0.715101	0.00638218
222	527	Effects of arbuscular mycorrhizal fungi on growth and nitrogen uptake of Chrysanthemum morifolium under salt stress	2017	1_2.9	Sandy	No_P_deficient	Acidic	Chrysanthemum morifolium	Asteraceae	Fibrous	Annual	180	5	35.8	1	Funneliformis mosseae	Glomeraceae	Rhizophilic guild	0.49826	0.518313	0.0296122	0.128861	0.107965	0.389837	0.0192741
222	528	Effects of arbuscular mycorrhizal fungi on growth and nitrogen uptake of Chrysanthemum morifolium under salt stress	2017	1_2.9	Sandy	No_P_deficient	Acidic	Chrysanthemum morifolium	Asteraceae	Fibrous	Annual	180	5	73	1	Diversispora versiformis	Diversisporaceae	Edaphophilic guild	0.49826	0.800697	0.0354777	0.396017	0.0782303	0.670346	0.012086
222	529	Effects of arbuscular mycorrhizal fungi on growth and nitrogen uptake of Chrysanthemum morifolium under salt stress	2017	1_2.9	Sandy	No_P_deficient	Acidic	Chrysanthemum morifolium	Asteraceae	Fibrous	Annual	180	5	60	>1	Mixed	Mixed	Mixed	0.49826	0.583336	0.0442325	0.483391	0.0921506	0.536428	0.0317982
223	530	Effects of arbuscular mycorrhizal fungi on in vivo root initiation and development of micropropagated plum shoots	1998	<1	Sandy	No_P_deficient	Neutral	Prunus cerasifera	Other	Taproot	Perennial	42	10	78.5	1	Funneliformis mosseae	Glomeraceae	Rhizophilic guild	1.09709	2.5893	0.002	1.86291	0.002	2.27441	0.002
224	531	E?ects of arbuscular mycorrhizal fungi on inoculated seedling growth and rhizosphere soil aggregates	2019	>2.9	No_sandy	P_deficent	Alkaline	Delavaya toxocarpa	Other	Taproot	Perennial	360	10	43.7	1	Rhizophagus intraradices	Glomeraceae	Rhizophilic guild	0.757576	0.0870114	0.0177788	-0.174353	0.00434376	-0.0173917	0.0103895
224	532	E?ects of arbuscular mycorrhizal fungi on inoculated seedling growth and rhizosphere soil aggregates	2019	>2.9	No_sandy	P_deficent	Alkaline	Delavaya toxocarpa	Other	Taproot	Perennial	360	10	44.5	1	Diversispora versiformis	Diversisporaceae	Edaphophilic guild	0.757576	0.167054	0.0173222	-0.127833	0.00366612	0.0504309	0.00985033
224	533	E?ects of arbuscular mycorrhizal fungi on inoculated seedling growth and rhizosphere soil aggregates	2019	>2.9	No_sandy	P_deficent	Alkaline	Delavaya toxocarpa	Other	Taproot	Perennial	360	10	54.8	1	Funneliformis mosseae	Glomeraceae	Rhizophilic guild	0.757576	0.217065	0.0242105	-0.040822	0.00333611	0.113944	0.0133488
225	534	Effects of arbuscular mycorrhizal fungi on severity of root rot of bananas caused by Cylindrocladium spathiphylli	2002	<1	Sandy			Musa acuminata	Other	Fibrous	Perennial	63	8	46	1	Glomus sp.	Glomeraceae	Rhizophilic guild	0.482759	0.621688	0.0025	0.251314	0.0025	0.515466	0.0025
225	535	Effects of arbuscular mycorrhizal fungi on severity of root rot of bananas caused by Cylindrocladium spathiphylli	2002	<1	Sandy			Musa acuminata	Other	Fibrous	Perennial	63	8	51	1	Glomus proliferum	Glomeraceae	Rhizophilic guild	0.482759	0.602996	0.0025	0.728239	0.0025	0.645519	0.0025
225	536	Effects of arbuscular mycorrhizal fungi on severity of root rot of bananas caused by Cylindrocladium spathiphylli	2002	<1	Sandy			Musa acuminata	Other	Fibrous	Perennial	63	8	51	1	Rhizophagus intraradices	Glomeraceae	Rhizophilic guild	0.482759	0.503905	0.0025	0.305382	0.0025	0.443493	0.0025
225	537	Effects of arbuscular mycorrhizal fungi on severity of root rot of bananas caused by Cylindrocladium spathiphylli	2002	<1	Sandy			Musa acuminata	Other	Fibrous	Perennial	63	8	64	1	Diversispora versiformis	Diversisporaceae	Edaphophilic guild	0.482759	0.461346	0.0025	0.693147	0.0025	0.542865	0.0025
226	538	Effects of arbuscular mycorrhizal fungi on the growth of two turfgrasses grown under greenhouse conditions	2017	>2.9	Sandy	P_deficent	Alkaline	Festuca arundinacea	Poaceae	Fibrous	Perennial	120	10	18.52	1	Funneliformis mosseae	Glomeraceae	Rhizophilic guild	0.51	0.106483	0.0187775	0.250621	0.0445339	0.144884	0.0243572
226	539	Effects of arbuscular mycorrhizal fungi on the growth of two turfgrasses grown under greenhouse conditions	2017	>2.9	Sandy	P_deficent	Alkaline	Festuca arundinacea	Poaceae	Fibrous	Perennial	120	10	17.61	1	Glomus aggregatum	Glomeraceae	Rhizophilic guild	0.51	0.0493251	0.0227295	0.0347328	0.0754224	0.0456607	0.0329414
226	540	Effects of arbuscular mycorrhizal fungi on the growth of two turfgrasses grown under greenhouse conditions	2017	>2.9	Sandy	P_deficent	Alkaline	Festuca arundinacea	Poaceae	Fibrous	Perennial	120	10	23.74	1	Rhizophagus intraradices	Glomeraceae	Rhizophilic guild	0.51	0.112777	0.0164199	0.0164952	0.0551509	0.0893272	0.0235732
226	541	Effects of arbuscular mycorrhizal fungi on the growth of two turfgrasses grown under greenhouse conditions	2017	>2.9	Sandy	P_deficent	Alkaline	Festuca arundinacea	Poaceae	Fibrous	Perennial	120	10	16.93	>1	Mixed	Glomeraceae	Rhizophilic guild	0.51	0.00350509	0.0182389	0.202559	0.067093	0.0576249	0.0282587
226	542	Effects of arbuscular mycorrhizal fungi on the growth of two turfgrasses grown under greenhouse conditions	2017	>2.9	Sandy	P_deficent	Alkaline	Poa pratensis	Poaceae	Fibrous	Perennial	120	10	23.07	1	Funneliformis mosseae	Glomeraceae	Rhizophilic guild	0.34	0.0586026	0.0121465	-0.140073	0.0475153	-0.00347102	0.0208709
226	543	Effects of arbuscular mycorrhizal fungi on the growth of two turfgrasses grown under greenhouse conditions	2017	>2.9	Sandy	P_deficent	Alkaline	Poa pratensis	Poaceae	Fibrous	Perennial	120	10	11.62	1	Glomus aggregatum	Glomeraceae	Rhizophilic guild	0.34	0.0113814	0.0188354	-0.0532607	0.066732	-0.00974938	0.031233
226	544	Effects of arbuscular mycorrhizal fungi on the growth of two turfgrasses grown under greenhouse conditions	2017	>2.9	Sandy	P_deficent	Alkaline	Poa pratensis	Poaceae	Fibrous	Perennial	120	10	19.74	1	Rhizophagus intraradices	Glomeraceae	Rhizophilic guild	0.34	0.160227	0.0114574	0.146415	0.0463019	0.155635	0.0204497
226	545	Effects of arbuscular mycorrhizal fungi on the growth of two turfgrasses grown under greenhouse conditions	2017	>2.9	Sandy	P_deficent	Alkaline	Poa pratensis	Poaceae	Fibrous	Perennial	120	10	10.98	>1	Mixed	Glomeraceae	Rhizophilic guild	0.34	0.067396	0.0151512	-0.135311	0.0557413	0.00414938	0.0251453
227	546	Effects of arbuscular mycorrhizal fungi, biochar and cadmium on the yield and element uptake of Medicago sativa	2019	>2.9	No_sandy		Acidic	Medicago sativa	Fabaceae	Taproot	Perennial	40	4	72	>1	Mixed	Mixed	Mixed	1.05248	-0.0294086	0.00785149	-0.0574152	0.00742091	-0.0436719	0.00762972
228	547	Effects of arbuscular mycorrhizal inoculation and fertilisation on the growth of Acacia mangium seedlings	2011	1_2.9	No_sandy	No_P_deficient	Acidic	Acacia mangium	Fabaceae	Taproot	Perennial	90	6	70.7	>1	Mixed	Mixed	Mixed	0.13	1.62924	0.163787	2.07944	4.14062	1.67964	0.226348
229	548	Effects of Arbuscular Mycorrhizal Inoculation and Phosphorus Application on Yield and Nutrient Uptake of Yam	2010	>2.9	Sandy	P_deficent	Acidic	Dioscorea rotundata	Asteraceae	Taproot	Perennial	102	4	36	>1	Mixed	Mixed	Mixed	0.765766	0.246297	0.005	0.409379	0.005	0.320307	0.005
230	549	Effects of arbuscular mycorrhizal inoculation on metallophyte and agricultural plants growing at increasing copper levels	2012	<1	Sandy			Helianthus annuus	Asteraceae	Taproot	Annual	90	3	19.7	1	Claroideoglomus claroideum	Claroideoglomeraceae	Rhizophilic guild	0.773572	-0.961646	0.00574972	-1.08126	0.148646	-1.01207	0.040144
230	550	Effects of arbuscular mycorrhizal inoculation on metallophyte and agricultural plants growing at increasing copper levels	2012	<1	Sandy			Helianthus annuus	Asteraceae	Taproot	Annual	90	3	31.2	>1	Mixed	Mixed	Mixed	0.773572	-0.909001	0.0516614	-0.0700701	0.0106662	-0.455969	0.0145781
230	551	Effects of arbuscular mycorrhizal inoculation on metallophyte and agricultural plants growing at increasing copper levels	2012	<1	Sandy			Imperata condensata	Poaceae	Fibrous	Perennial	90	3	20.7	1	Claroideoglomus claroideum	Claroideoglomeraceae	Rhizophilic guild	0.2926	-0.190878	0.00397607	-0.470769	0.0296854	-0.247727	0.00604509
230	552	Effects of arbuscular mycorrhizal inoculation on metallophyte and agricultural plants growing at increasing copper levels	2012	<1	Sandy			Imperata condensata	Poaceae	Fibrous	Perennial	90	3	13.9	>1	Mixed	Mixed	Mixed	0.2926	-0.765188	0.00364064	1.27174	0.038374	0.154771	0.0213619
230	553	Effects of arbuscular mycorrhizal inoculation on metallophyte and agricultural plants growing at increasing copper levels	2012	<1	Sandy			Oenothera picensis	Other	Fibrous	Annual	90	3	27.3	1	Claroideoglomus claroideum	Claroideoglomeraceae	Rhizophilic guild	0.624573	0.362084	0.00411185	-1.30353	0.044606	-0.0115385	0.00635554
230	554	Effects of arbuscular mycorrhizal inoculation on metallophyte and agricultural plants growing at increasing copper levels	2012	<1	Sandy			Oenothera picensis	Other	Fibrous	Annual	90	3	25.9	>1	Mixed	Mixed	Mixed	0.624573	1.20287	0.0197421	-0.428282	0.0147955	0.832945	0.0194291
231	555	Effects of arbuscular mycorrhizal inoculation on the growth, zinc distribution and photosynthesis of two citrus cultivars grown in low-zinc soil	2014	>2.9	No_sandy	No_P_deficient	Neutral	Citrus reticulata	Rutaceae	Taproot	Perennial	180	3	44.64	1	Rhizophagus intraradices	Glomeraceae	Rhizophilic guild	0.63197	0.289885	0.02118	0.451019	0.00347035	0.355398	0.00779701
231	556	Effects of arbuscular mycorrhizal inoculation on the growth, zinc distribution and photosynthesis of two citrus cultivars grown in low-zinc soil	2014	>2.9	No_sandy	No_P_deficient	Neutral	Citrus sinensis	Rutaceae	Taproot	Perennial	180	3	39.26	1	Rhizophagus intraradices	Glomeraceae	Rhizophilic guild	0.850729	0.325482	0.0294937	0.239179	0.00241024	0.286734	0.00952146
232	557	Effects of Arbuscular Mycorrhizal Symbiosis on Growth, Nutrient and Metal Uptake by Maize Seedlings ( L.) Grown in Soils Spiked with Lanthanum Zea mays and Cadmium	2017	1_2.9	Sandy	P_deficent	Alkaline	Zea mays	Poaceae	Fibrous	Annual	60	6	33.97	1	Claroideoglomus etunicatum	Claroideoglomeraceae	Rhizophilic guild	0.222009	0.197875	0.00630956	0.114255	0.0272301	0.183194	0.00806027
233	558	Effects of Bifenthrin on Mycorrhizal Colonization and Growth of Corn	2009		Sandy			Zea mays	Poaceae	Fibrous	Annual	42	5	40.2	1	Glomus sp.	Glomeraceae	Rhizophilic guild	0.81	0.0198026	0.0504546	-0.498247	0.0392111	-0.176751	0.0468097
234	559	Effects of cadmium-resistant plant growth- promoting rhizobacteria and Funneliformis mosseae on the cadmium tolerance of tomato (Lycopersicon esculentum L.)	2019	1_2.9	No_sandy			Lycopersicon esculentum	Solanaceae	Taproot	Annual	60	4	27	1	Funneliformis mosseae	Glomeraceae	Rhizophilic guild	0.214563	0.62974	0.0189866	0.80984	0.0741061	0.664008	0.0260847
235	560	Effects of different arbuscular mycorrhizal fungi (AMF) species on some bean (Phaseolus vulgaris L.) cultivars grown in salty conditions	2010	<1	Sandy		Alkaline	Phaseolus vulgaris	Fabaceae	Taproot	Annual	42	4	33.75	1	Funneliformis mosseae	Glomeraceae	Rhizophilic guild	0.241935	0.0106953	0.00934404	0.0219789	0.0334794	0.0129034	0.0125552
235	561	Effects of different arbuscular mycorrhizal fungi (AMF) species on some bean (Phaseolus vulgaris L.) cultivars grown in salty conditions	2010	<1	Sandy		Alkaline	Phaseolus vulgaris	Fabaceae	Taproot	Annual	42	4	24.25	1	Rhizophagus intraradices	Glomeraceae	Rhizophilic guild	0.241935	-0.0782522	0.018639	-0.0930904	0.0462235	-0.0811255	0.0230149
235	562	Effects of different arbuscular mycorrhizal fungi (AMF) species on some bean (Phaseolus vulgaris L.) cultivars grown in salty conditions	2010	<1	Sandy		Alkaline	Phaseolus vulgaris	Fabaceae	Taproot	Annual	42	4	32.75	1	Rhizophagus fasciculatus	Glomeraceae	Rhizophilic guild	0.241935	-0.0899482	0.00933206	-0.143101	0.0226576	-0.100083	0.0114616
236	563	Effects of earthworms and mycorrhizal fungi on the growth of the medicinal herb Calendula officinalis (Asteraceae)	2011	1_2.9	No_sandy	No_P_deficient	Alkaline	Calendula officinalis	Asteraceae	Taproot	Perennial	90	6	22.4	>1	Mixed	Mixed	Mixed	0.436945	0.27066	0.053365	-0.033063	0.0248819	0.18766	0.043632
237	564	Effects of EDTA application and arbuscular mycorrhizal colonization on growth and zinc uptake by maize (Zea mays L.) in soil experimentally contaminated with zinc	2004	1_2.9	Sandy	P_deficent	Alkaline	Zea mays	Poaceae	Fibrous	Annual	49	3	76.9	1	Funneliformis caledonium	Glomeraceae	Rhizophilic guild	0.634866	0.0583633	0.0225141	-0.0972417	0.0109891	0.000777303	0.0176617
238	565	Effects of epigeic earthworm (Eisenia fetida) and arbuscular mycorrhizal fungus (Glomus intraradices) on enzyme activities of a sterilized soil – sand mixture and nutrient uptake by maize	2012	1_2.9	Sandy	P_deficent	Alkaline	Zea mays	Poaceae	Fibrous	Annual	70	4	64	1	Rhizophagus intraradices	Glomeraceae	Rhizophilic guild	0.47541	0.248095	8.65e-05	0.0892064	0.00134223	0.199601	0.00031573
239	566	Effects of foliar fertilization and arbuscular mycorrhizal colonization on Salvia of?cinalis L. growth, antioxidant capacity, and essential oil composition	2009	>2.9	No_sandy	No_P_deficient	Acidic	Salvia officinalis	Other	Taproot	Perennial	70	5		1	Rhizophagus intraradices	Glomeraceae	Rhizophilic guild	0.50598	0.231389	0.004	0.449337	0.004	0.310033	0.004
240	567	Effects of Glomus mosseae and Rhizobiu m on the growth of black locust seedlings and the quality of weathered soft rock soils in the Loess Plateau, China	2012	1_2.9	Sandy	No_P_deficient	Alkaline	Robinia pseudoacacia	Fabaceae	Taproot	Perennial	180	5	79.2	1	Funneliformis mosseae	Glomeraceae	Rhizophilic guild	0.488636	0.314313	0.00204028	0.307827	0.00425925	0.312188	0.00259378
241	568	Effects of inoculation with Glomus intraradices on lead uptake by Zea mays L. and Agrostis capillaris L.	2003		Sandy		Acidic	Agrostis capillaris	Poaceae	Fibrous	Perennial	140	12	71	1	Rhizophagus intraradices	Glomeraceae	Rhizophilic guild	0.447811	0.528844	0.00889001	0.538997	0.0207348	0.531995	0.0120338
241	569	Effects of inoculation with Glomus intraradices on lead uptake by Zea mays L. and Agrostis capillaris L.	2003		Sandy		Acidic	Agrostis capillaris	Poaceae	Fibrous	Perennial	140	12	67	1	Rhizophagus intraradices	Glomeraceae	Rhizophilic guild	0.447811	0.0683192	0.015016	-0.145417	0.035899	0.00695252	0.0197903
241	570	Effects of inoculation with Glomus intraradices on lead uptake by Zea mays L. and Agrostis capillaris L.	2003		Sandy		Acidic	Zea mays	Poaceae	Fibrous	Annual	140	12	41	1	Rhizophagus intraradices	Glomeraceae	Rhizophilic guild	2.07576	-0.755668	0.0380571	-0.465634	0.0232316	-0.551032	0.0271551
241	571	Effects of inoculation with Glomus intraradices on lead uptake by Zea mays L. and Agrostis capillaris L.	2003		Sandy		Acidic	Zea mays	Poaceae	Fibrous	Annual	140	12	35	1	Rhizophagus intraradices	Glomeraceae	Rhizophilic guild	2.07576	-1.51551	0.0835739	-1.10227	0.117007	-1.21886	0.107906
242	572	Effects of inoculation with Glomus mosseae, Azorhizobium caulinodans and rock phosphate on the growth of and nitrogen and phosphorus accumulation in Sesbania rostrata	1997	<1	Sandy	P_deficent	Acidic	Sesbania rostrata	Fabaceae	Taproot	Perennial	42	3	6.7	1	Funneliformis mosseae	Glomeraceae	Rhizophilic guild	0.198864	-0.00569802	0.00666667	-0.188052	0.00666667	-0.0337381	0.00666667
243	573	Effects of Interactions Between Cadmium and Lead on Growth, Nitrogen Fixation, Phytochelatin, and Glutathione Production in Mycorrhizal Cajanus cajan (L.) Millsp.	2011	>2.9	Sandy	No_P_deficient	Neutral	Cajanus cajan	Fabaceae	Taproot	Perennial	60	6	85.36	1	Funneliformis mosseae	Glomeraceae	Rhizophilic guild	0.181152	0.631049	0.0754247	0.524831	0.291291	0.615473	0.097608
243	574	Effects of Interactions Between Cadmium and Lead on Growth, Nitrogen Fixation, Phytochelatin, and Glutathione Production in Mycorrhizal Cajanus cajan (L.) Millsp.	2011	>2.9	Sandy	No_P_deficient	Neutral	Cajanus cajan	Fabaceae	Taproot	Perennial	60	6	80.15	1	Funneliformis mosseae	Glomeraceae	Rhizophilic guild	0.185408	0.438393	0.42939	0.213841	0.0791095	0.40643	0.347629
244	575	Effects of Iron-Modified Biochar and AMF Inoculation on the Growth and Heavy Metal Uptake of Senna occidentalis in Heavy Metal-Contaminated Soil	2019	1_2.9	Sandy		Acidic	Senna occidentalis	Fabaceae	Fibrous	Annual	84	4	57	1	Funneliformis mosseae	Glomeraceae	Rhizophilic guild	0.368511	0.473758	0.189905	-0.123801	0.324173	0.344635	0.216403
245	576	Effects of liming and mycorrhizal colonization on soil phosphate depletion and phosphate uptake by maize (Zea mays L.) and soybean (Glycine max L.) grown in two tropical acid soils	1996		No_sandy	P_deficent	Acidic	Glycine max	Fabaceae	Taproot	Annual	42	4	82	1	Rhizophagus intraradices	Glomeraceae	Rhizophilic guild	0.439024	0.442181	0.005	0.173019	0.005	0.367464	0.005
245	577	Effects of liming and mycorrhizal colonization on soil phosphate depletion and phosphate uptake by maize (Zea mays L.) and soybean (Glycine max L.) grown in two tropical acid soils	1996		No_sandy	P_deficent	Acidic	Zea mays	Poaceae	Fibrous	Annual	42	4	68	1	Rhizophagus intraradices	Glomeraceae	Rhizophilic guild	0.412281	0.378797	0.005	0.22739	0.005	0.336916	0.005
246	578	Effects of mes [2(n‐morpholino)‐ethanesulfonic acid] and ph on mineral nutrient uptake by mycor‐rhizal and nonmycorrhizal maize	1993	>2.9	Sandy			Zea mays	Poaceae	Fibrous	Annual	42	2		1	Rhizophagus intraradices	Glomeraceae	Rhizophilic guild	1.10345	-0.969401	0.01	-0.888048	0.01	-0.9259	0.01
247	579	Effects of Mycorrhiza Colonization on Growth, Root Exudates, Antioxidant Activity and Photosynthesis Trait of Cucumber Grown in Johanson Modified Nutrient Solution	2016		Sandy			Cucumis sativus	Other	Taproot	Annual	90	3		1	Funneliformis mosseae	Glomeraceae	Rhizophilic guild	0.869565	0.0833816	0.00666667	0	0.00666667	0.0454624	0.00666667
248	580	Effects of Mycorrhiza Innoculation on Cucumber Growth Irrigated with Saline Water	2017	>2.9	Sandy			Cucumis sativus	Other	Taproot	Annual	124	4		1	Funneliformis mosseae	Glomeraceae	Rhizophilic guild	0.300528	0.120763	0.005	0.869621	0.005	0.349936	0.005
249	581	Effects of mycorrhizal fungi on tolerance capability of corn grown under salt stress condition	2014	1_2.9	Sandy	P_deficent	Neutral	Zea mays	Poaceae	Fibrous	Annual	45	5	46.67	1	Funneliformis mosseae	Glomeraceae	Rhizophilic guild	1.09075	-0.137096	0.00516991	0.193676	0.00200066	0.0489928	0.00214999
249	582	Effects of mycorrhizal fungi on tolerance capability of corn grown under salt stress condition	2014	1_2.9	Sandy	P_deficent	Neutral	Zea mays	Poaceae	Fibrous	Annual	45	5	40	>1	Mixed	Mixed	Mixed	1.09075	0.028072	0.00565247	0.0305245	0.000904467	0.0293522	0.00193185
250	583	Effects of mycorrhizal fungus isolates on mineral acquisition by Panicum virgatum in acidic soil	1999	1_2.9	No_sandy	P_deficent	Acidic	Panicum virgatum	Poaceae	Fibrous	Annual	88	5	29	1	Rhizophagus intraradices	Glomeraceae	Rhizophilic guild	0.8125	2.47444	0.004	1.63974	0.004	2.18178	0.004
250	584	Effects of mycorrhizal fungus isolates on mineral acquisition by Panicum virgatum in acidic soil	1999	1_2.9	No_sandy	P_deficent	Acidic	Panicum virgatum	Poaceae	Fibrous	Annual	88	5	18	1	Gigaspora rosea	Gigasporaceae	Edaphophilic guild	0.8125	0.0606246	0.004	-0.167054	0.004	-0.0350913	0.004
250	585	Effects of mycorrhizal fungus isolates on mineral acquisition by Panicum virgatum in acidic soil	1999	1_2.9	No_sandy	P_deficent	Acidic	Panicum virgatum	Poaceae	Fibrous	Annual	88	5	37	1	Gigaspora albida	Gigasporaceae	Edaphophilic guild	0.8125	2.89729	0.004	1.07264	0.004	2.42572	0.004
250	586	Effects of mycorrhizal fungus isolates on mineral acquisition by Panicum virgatum in acidic soil	1999	1_2.9	No_sandy	P_deficent	Acidic	Panicum virgatum	Poaceae	Fibrous	Annual	88	5	22	1	Claroideoglomus etunicatum	Claroideoglomeraceae	Rhizophilic guild	0.8125	3.57655	0.004	1.68355	0.004	3.09729	0.004
250	587	Effects of mycorrhizal fungus isolates on mineral acquisition by Panicum virgatum in acidic soil	1999	1_2.9	No_sandy	P_deficent	Acidic	Panicum virgatum	Poaceae	Fibrous	Annual	88	5	51	1	Gigaspora margarita	Gigasporaceae	Edaphophilic guild	0.8125	3.49081	0.004	1.76578	0.004	3.0313	0.004
250	588	Effects of mycorrhizal fungus isolates on mineral acquisition by Panicum virgatum in acidic soil	1999	1_2.9	No_sandy	P_deficent	Acidic	Panicum virgatum	Poaceae	Fibrous	Annual	88	5	41	1	Acaulospora morrowiae	Acaulosporaceae	Ancestral guild	0.8125	3.09671	0.004	2.62801	0.004	2.9131	0.004
250	589	Effects of mycorrhizal fungus isolates on mineral acquisition by Panicum virgatum in acidic soil	1999	1_2.9	No_sandy	P_deficent	Acidic	Panicum virgatum	Poaceae	Fibrous	Annual	88	5	28	1	Glomus diaphanum	Glomeraceae	Rhizophilic guild	0.8125	3.59216	0.004	2.05017	0.004	3.15773	0.004
250	590	Effects of mycorrhizal fungus isolates on mineral acquisition by Panicum virgatum in acidic soil	1999	1_2.9	No_sandy	P_deficent	Acidic	Panicum virgatum	Poaceae	Fibrous	Annual	88	5	35	1	Rhizophagus clarus	Glomeraceae	Rhizophilic guild	0.8125	3.44002	0.004	2.94848	0.004	3.24877	0.004
251	591	Effects of nitrogen feeding for extraradical mycelium of Rhizophagus irregularis maize symbiosis incorporated with phosphorus availability	2019	1_2.9	Sandy			Zea mays	Poaceae	Fibrous	Annual	56	8	62	1	Rhizophagus irregularis	Glomeraceae	Rhizophilic guild	0.315259	0.381676	0.00827723	0.264676	0.012205	0.354853	0.00903875
252	592	Effects of plant-growth-promoting rhizobacteria and arbuscular mycorrhizal fungus on plant growth, stevioside, NPK, and chlorophyll content of Stevia rebaudiana	2013	<1	Sandy		Acidic	Stevia rebaudiana	Asteraceae	Fibrous	Annual	60	4		1	Rhizophagus intraradices	Glomeraceae	Rhizophilic guild	0.235747	0.201651	0.0134557	0.622051	0.00184566	0.296681	0.0101825
253	593	Effects of pre- and post-transplant inoculation with commercial arbuscular mycorrhizal (AM) fungi on pelargonium (Pelargonium hortorum) and its microorganism community	2012	<1		No_P_deficient	Acidic	Pelargonium hortorum	Other	Taproot	Perennial	42	5	9	>1	Mixed	Mixed	Mixed	0.228571	0.322773	0.004	0.432864	0.004	0.344194	0.004
254	594	Effects of rhizobium, arbuscular mycorrhizal fungi and anion content of simulated rain on subterranean clover	1996	<1	Sandy	P_deficent	Acidic	Trifolium subterraneum	Fabaceae	Fibrous	Perennial	84	3		1	Rhizophagus intraradices	Glomeraceae	Rhizophilic guild	0.75	0.0377403	0.00666667	0.0882926	0.00666667	0.0597192	0.00666667
254	595	Effects of rhizobium, arbuscular mycorrhizal fungi and anion content of simulated rain on subterranean clover	1996	<1	Sandy	P_deficent	Acidic	Trifolium subterraneum	Fabaceae	Fibrous	Perennial	84	3		1	Claroideoglomus etunicatum	Claroideoglomeraceae	Rhizophilic guild	0.75	0.175891	0.00666667	0.36179	0.00666667	0.259825	0.00666667
255	596	Effects of soil application of olive mill wastewaters on the structure and function of the community of arbuscular mycorrhizal fungi	2009		Sandy		Acidic	Vicia faba	Fabaceae	Fibrous	Annual	35	5	27	>1	Mixed	Mixed	Mixed	0.787477	0.135116	0.0324565	-0.30303	0.0718479	-0.0348353	0.0459647
256	597	Effects of the arbuscular mycorrhizal fungus Glomus mosseae on growth and metal uptake by four plant species in copper mine tailings	2007	<1	Sandy	P_deficent	Alkaline	Coreopsis drummondii	Asteraceae	Taproot	Perennial	60	4	24.2	1	Funneliformis mosseae	Glomeraceae	Rhizophilic guild	0.509045	1.94326	0.119582	1.86212	0.220472	1.91662	0.149099
256	598	Effects of the arbuscular mycorrhizal fungus Glomus mosseae on growth and metal uptake by four plant species in copper mine tailings	2007	<1	Sandy	P_deficent	Alkaline	Trifolium repens	Fabaceae	Fibrous	Perennial	60	4	18	1	Funneliformis mosseae	Glomeraceae	Rhizophilic guild	0.886736	2.27414	0.654692	1.78427	0.148449	2.07322	0.371769
257	599	Effects of two different AMF species on growth and nutrient content of pepper seedlings grown under moderate salt stress	2008	<1	Sandy	No_P_deficient	Alkaline	Capsicum annuum	Solanaceae	Fibrous	Annual	70	4	28.8	1	Rhizophagus intraradices	Glomeraceae	Rhizophilic guild	0.325153	0.407508	0.005	0.320168	0.005	0.386773	0.005
257	600	Effects of two different AMF species on growth and nutrient content of pepper seedlings grown under moderate salt stress	2008	<1	Sandy	No_P_deficient	Alkaline	Capsicum annuum	Solanaceae	Fibrous	Annual	70	4	24.3	1	Gigaspora margarita	Gigasporaceae	Edaphophilic guild	0.325153	0.313422	0.005	0.249216	0.005	0.298045	0.005
258	601	Effects on growth of persimmon (Diospyros virginiana) rootstock of arbuscular mycorrhizal fungi species	2015	>2.9	No_sandy	No_P_deficient	Alkaline	Diospyros virginiana	Other	Taproot	Perennial	56	10	28	1	Rhizophagus clarus	Glomeraceae	Rhizophilic guild	0.433915	0.54273	0.00560185	0.435656	0.00405989	0.511521	0.00502863
258	602	Effects on growth of persimmon (Diospyros virginiana) rootstock of arbuscular mycorrhizal fungi species	2015	>2.9	No_sandy	No_P_deficient	Alkaline	Diospyros virginiana	Other	Taproot	Perennial	56	10	36	1	Claroideoglomus etunicatum	Claroideoglomeraceae	Rhizophilic guild	0.433915	0.640672	0.00418587	0.724267	0.00432689	0.666714	0.00401241
258	603	Effects on growth of persimmon (Diospyros virginiana) rootstock of arbuscular mycorrhizal fungi species	2015	>2.9	No_sandy	No_P_deficient	Alkaline	Diospyros virginiana	Other	Taproot	Perennial	56	10	30	1	Funneliformis mosseae	Glomeraceae	Rhizophilic guild	0.433915	0.547069	0.00273762	0.457716	0.00214897	0.520862	0.00249259
258	604	Effects on growth of persimmon (Diospyros virginiana) rootstock of arbuscular mycorrhizal fungi species	2015	>2.9	No_sandy	No_P_deficient	Alkaline	Diospyros virginiana	Other	Taproot	Perennial	56	10	40	1	Funneliformis caledonium	Glomeraceae	Rhizophilic guild	0.433915	0.481471	0.00450805	0.587148	0.00346172	0.514644	0.00408469
258	605	Effects on growth of persimmon (Diospyros virginiana) rootstock of arbuscular mycorrhizal fungi species	2015	>2.9	No_sandy	No_P_deficient	Alkaline	Diospyros virginiana	Other	Taproot	Perennial	56	10	40	1	Rhizophagus intraradices	Glomeraceae	Rhizophilic guild	0.433915	0.190187	0.00330767	0.710242	0.00273544	0.377841	0.00312626
259	606	Efficacy of six VAM fungi with containerized Acer platanoides	1991	>2.9	Sandy	P_deficent	Neutral	Acer platanoides	Other	Taproot	Perennial	147	6	45	1	Diversispora versiformis	Diversisporaceae	Edaphophilic guild	0.358541	0.455056	0.00333333	0.178358	0.00333333	0.389138	0.00333333
259	607	Efficacy of six VAM fungi with containerized Acer platanoides	1991	>2.9	Sandy	P_deficent	Neutral	Acer platanoides	Other	Taproot	Perennial	147	6	45	1	Claroideoglomus etunicatum	Claroideoglomeraceae	Rhizophilic guild	0.358541	1.07777	0.00333333	0.698943	0.00333333	0.990878	0.00333333
259	608	Efficacy of six VAM fungi with containerized Acer platanoides	1991	>2.9	Sandy	P_deficent	Neutral	Acer platanoides	Other	Taproot	Perennial	147	6	45	1	Glomus lesclculatum	Glomeraceae	Rhizophilic guild	0.358541	-0.149696	0.00333333	-0.251743	0.00333333	-0.175633	0.00333333
259	609	Efficacy of six VAM fungi with containerized Acer platanoides	1991	>2.9	Sandy	P_deficent	Neutral	Acer platanoides	Other	Taproot	Perennial	147	6	20	1	Glomus macrocarpum	Glomeraceae	Rhizophilic guild	0.358541	0.114689	0.00333333	-0.333161	0.00333333	0.0145661	0.00333333
259	610	Efficacy of six VAM fungi with containerized Acer platanoides	1991	>2.9	Sandy	P_deficent	Neutral	Acer platanoides	Other	Taproot	Perennial	147	6	45	1	Funneliformis mosseae	Glomeraceae	Rhizophilic guild	0.358541	0.296433	0.00333333	-0.202606	0.00333333	0.186965	0.00333333
259	611	Efficacy of six VAM fungi with containerized Acer platanoides	1991	>2.9	Sandy	P_deficent	Neutral	Acer platanoides	Other	Taproot	Perennial	147	6	45	1	Gigaspora margarita	Gigasporaceae	Edaphophilic guild	0.358541	0.022691	0.00333333	-0.0660885	0.00333333	1.55e-05	0.00333333
260	612	Efficiencies of Five Arbuscular Mycorrhizal Fungi in Alleviating Salt Stress of Trifoliate Orange	2011	1_2.9	No_sandy	No_P_deficient	Acidic	Citrus spp	Rutaceae	Taproot	Perennial	102	3	35.3	1	Diversispora spurca	Diversisporaceae	Edaphophilic guild	0.205882	0.205339	0.00759288	0.318454	0.0187637	0.22558	0.00659552
260	613	Efficiencies of Five Arbuscular Mycorrhizal Fungi in Alleviating Salt Stress of Trifoliate Orange	2011	1_2.9	No_sandy	No_P_deficient	Acidic	Citrus spp	Rutaceae	Taproot	Perennial	102	3	13.1	1	Claroideoglomus etunicatum	Claroideoglomeraceae	Rhizophilic guild	0.205882	-0.180852	0.000539229	-0.264152	0.0397153	-0.194592	0.00246696
260	614	Efficiencies of Five Arbuscular Mycorrhizal Fungi in Alleviating Salt Stress of Trifoliate Orange	2011	1_2.9	No_sandy	No_P_deficient	Acidic	Citrus spp	Rutaceae	Taproot	Perennial	102	3	27.2	1	Funneliformis mosseae	Glomeraceae	Rhizophilic guild	0.205882	0.231928	0.00196653	0.331357	0.0057595	0.249619	0.00125456
260	615	Efficiencies of Five Arbuscular Mycorrhizal Fungi in Alleviating Salt Stress of Trifoliate Orange	2011	1_2.9	No_sandy	No_P_deficient	Acidic	Citrus spp	Rutaceae	Taproot	Perennial	102	3	53.9	1	Diversispora versiformis	Diversisporaceae	Edaphophilic guild	0.205882	0.480973	0.00567907	0.451985	0.00833035	0.476083	0.00405497
260	616	Efficiencies of Five Arbuscular Mycorrhizal Fungi in Alleviating Salt Stress of Trifoliate Orange	2011	1_2.9	No_sandy	No_P_deficient	Acidic	Citrus spp	Rutaceae	Taproot	Perennial	102	3	16.7	1	Paraglomus occultum	Paraglomeraceae	Rhizophilic guild	0.205882	0.14994	0.0109598	0.194156	0.00856225	0.157629	0.00753398
261	617	EFFICIENCY OF ELEMENTAL SULFUR ON MYCORRHIZAE IN THE YIELD INCREASE OF WHEAT	2012	>2.9	No_sandy	P_deficent	Alkaline	Triticum spp	Poaceae	Fibrous	Annual	150	3		1	Funneliformis mosseae	Glomeraceae	Rhizophilic guild	0.125	0.223144	0.00666667	1.64223	0.00666667	0.521875	0.00666667
262	618	Endophytic selenobacteria and arbuscular mycorrhizal fungus for Selenium biofortification and Gaeumannomyces graminis biocontrol	2018	<1	No_sandy	No_P_deficient	Acidic	Triticum aestivum	Poaceae	Fibrous	Annual	45	3		1	Claroideoglomus claroideum	Claroideoglomeraceae	Rhizophilic guild	0.533096	-0.0361351	0.00654277	-1.46145	0.0836116	-0.342824	0.0177233
263	619	Enhanced concentrations of elements and secondary metabolites in Viola tricolor L. induced by arbuscular mycorrhizal fungi	2015	1_2.9	No_sandy	No_P_deficient	Alkaline	Viola tricolor	Other	Fibrous	Annual	90	5	30	1	Funneliformis mosseae	Glomeraceae	Rhizophilic guild	0.179859	-0.102969	0.04417	-0.0444518	0.0263649	-0.0938241	0.040982
263	620	Enhanced concentrations of elements and secondary metabolites in Viola tricolor L. induced by arbuscular mycorrhizal fungi	2015	1_2.9	No_sandy	No_P_deficient	Alkaline	Viola tricolor	Other	Fibrous	Annual	90	5	34	1	Rhizophagus irregularis	Glomeraceae	Rhizophilic guild	0.179859	-0.451222	0.0215873	-0.10973	0.0125325	-0.391021	0.0199215
263	621	Enhanced concentrations of elements and secondary metabolites in Viola tricolor L. induced by arbuscular mycorrhizal fungi	2015	1_2.9	No_sandy	No_P_deficient	Alkaline	Viola tricolor	Other	Fibrous	Annual	90	5	24	>1	Mixed	Glomeraceae	Rhizophilic guild	0.179859	-0.391356	0.0187048	-0.0805731	0.013612	-0.337281	0.0175442
264	622	ENHANCEMENT IN ARSENIC REMEDIATION BY MAIZE (ZEA MAYS L.) USING EDTA IN COMBINATION WITH ARBUSCULAR MYCORRHIZAL FUNGI	2018	>2.9	No_sandy	No_P_deficient	Acidic	Zea mays	Poaceae	Fibrous	Annual	65	3	65	1	Diversispora versiformis	Diversisporaceae	Edaphophilic guild	0.116004	0.433103	0.00163305	0.519917	0.0478754	0.442486	0.00352988
265	623	Enhancement of Lead Uptake by Fenugreek Using EDTA and Glomus mosseae	2013	1_2.9	Sandy	No_P_deficient	Alkaline	Trigonella foenum-graecum	Fabaceae	Taproot	Annual	60	5	95.7	1	Funneliformis mosseae	Glomeraceae	Rhizophilic guild	0.095	0.508322	0.00321035	0.274437	0.00286565	0.490064	0.00317727
266	624	European and African maize cultivars differ in their physiological and molecular responses to mycorrhizal infection	2005	1_2.9	Sandy			Zea mays	Poaceae	Fibrous	Annual	34	4	76	1	Rhizophagus intraradices	Glomeraceae	Rhizophilic guild	0.623884	0.671752	0.0186946	0.133826	0.082518	0.507851	0.0261676
266	625	European and African maize cultivars differ in their physiological and molecular responses to mycorrhizal infection	2005	1_2.9	Sandy			Zea mays	Poaceae	Fibrous	Annual	34	4	94	1	Rhizophagus intraradices	Glomeraceae	Rhizophilic guild	0.960442	0.656224	0.0412037	0.0848762	0.0677919	0.41214	0.0541379
267	626	Evaluation of vesicular-arbuscular mycorrhizal fungi in diverse plants and soils	1993	<1	Sandy	No_P_deficient	Acidic	Glycine mux	Fabaceae	Fibrous	Annual	57	40		1	Glomus ehmicatum	Glomeraceae	Rhizophilic guild	0.875581	2.12011	0.0005	1.80793	0.0005	1.98637	0.0005
267	627	Evaluation of vesicular-arbuscular mycorrhizal fungi in diverse plants and soils	1993	<1	Sandy	No_P_deficient	Acidic	Glycine mux	Fabaceae	Fibrous	Annual	57	40		1	Glomus sp.	Glomeraceae	Rhizophilic guild	0.875581	2.18827	0.0005	1.9327	0.0005	2.07702	0.0005
267	628	Evaluation of vesicular-arbuscular mycorrhizal fungi in diverse plants and soils	1993	<1	Sandy	No_P_deficient	Acidic	Glycine mux	Fabaceae	Fibrous	Annual	57	40		1	Glomus ehmicatum	Glomeraceae	Rhizophilic guild	0.875581	2.00716	0.0005	1.83046	0.0005	1.92854	0.0005
267	629	Evaluation of vesicular-arbuscular mycorrhizal fungi in diverse plants and soils	1993	<1	Sandy	No_P_deficient	Acidic	Glycine mux	Fabaceae	Fibrous	Annual	57	40		1	Glomus ehmicatum	Glomeraceae	Rhizophilic guild	0.875581	1.45826	0.0005	1.47122	0.0005	1.46433	0.0005
267	630	Evaluation of vesicular-arbuscular mycorrhizal fungi in diverse plants and soils	1993	<1	Sandy	No_P_deficient	Acidic	Glycine mux	Fabaceae	Fibrous	Annual	57	40		1	Glomus claroides	Glomeraceae	Rhizophilic guild	0.875581	1.09121	0.0005	1.05113	0.0005	1.0727	0.0005
267	631	Evaluation of vesicular-arbuscular mycorrhizal fungi in diverse plants and soils	1993	<1	Sandy	No_P_deficient	Acidic	Glycine mux	Fabaceae	Fibrous	Annual	57	40		1	Acaulospora colombiana	Acaulosporaceae	Ancestral guild	0.875581	0.483627	0.0005	0.382821	0.0005	0.437829	0.0005
267	632	Evaluation of vesicular-arbuscular mycorrhizal fungi in diverse plants and soils	1993	<1	Sandy	No_P_deficient	Acidic	Sorghum bicolor	Poaceae	Fibrous	Annual	57	40		1	Glomus ehmicatum	Glomeraceae	Rhizophilic guild	0.491988	0.962128	0.0005	0.692148	0.0005	0.880894	0.0005
267	633	Evaluation of vesicular-arbuscular mycorrhizal fungi in diverse plants and soils	1993	<1	Sandy	No_P_deficient	Acidic	Sorghum bicolor	Poaceae	Fibrous	Annual	57	40		1	Glomus sp.	Glomeraceae	Rhizophilic guild	0.491988	1.10615	0.0005	0.861681	0.0005	1.03195	0.0005
267	634	Evaluation of vesicular-arbuscular mycorrhizal fungi in diverse plants and soils	1993	<1	Sandy	No_P_deficient	Acidic	Sorghum bicolor	Poaceae	Fibrous	Annual	57	40		1	Glomus ehmicatum	Glomeraceae	Rhizophilic guild	0.491988	1.07933	0.0005	0.824426	0.0005	1.00224	0.0005
267	635	Evaluation of vesicular-arbuscular mycorrhizal fungi in diverse plants and soils	1993	<1	Sandy	No_P_deficient	Acidic	Sorghum bicolor	Poaceae	Fibrous	Annual	57	40		1	Glomus ehmicatum	Glomeraceae	Rhizophilic guild	0.491988	0.705457	0.0005	0.681761	0.0005	0.697705	0.0005
267	636	Evaluation of vesicular-arbuscular mycorrhizal fungi in diverse plants and soils	1993	<1	Sandy	No_P_deficient	Acidic	Sorghum bicolor	Poaceae	Fibrous	Annual	57	40		1	Glomus claroides	Glomeraceae	Rhizophilic guild	0.491988	0.521335	0.0005	0.743505	0.0005	0.600181	0.0005
267	637	Evaluation of vesicular-arbuscular mycorrhizal fungi in diverse plants and soils	1993	<1	Sandy	No_P_deficient	Acidic	Sorghum bicolor	Poaceae	Fibrous	Annual	57	40		1	Acaulospora colombiana	Acaulosporaceae	Ancestral guild	0.491988	0.189564	0.0005	0.104228	0.0005	0.162221	0.0005
268	638	Evidence that arbuscular mycorrhizal and phosphate-solubilizing fungi alleviate NaCl stress in the halophyte Kosteletzkya virginica : nutrient uptake and ion distribution within root tissues	2013	<1	Sandy	P_deficent	Alkaline	Kosteletzkya virginica	Other	Taproot	Perennial	92	6	43.3	1	Funneliformis mosseae	Glomeraceae	Rhizophilic guild	0.19	0.287682	0.149414	0.361013	0.0702158	0.299846	0.132994
269	639	Facilitation of plant phosphate acquisition by arbuscular mycorrhizas from enriched soil patches I. Roots and hyphae exploiting the same soil volume	1996	>2.9	No_sandy		Alkaline	Agropyron desertorum	Poaceae	Fibrous	Perennial	120	9	38	1	Glomus sp.	Glomeraceae	Rhizophilic guild	1.30157	0.266237	0.0128359	0.0942137	0.0147472	0.171382	0.0139019
270	640	Facilitation of Plant Phosphate Acquisition by Arbuscular Mycorrhizas from Enriched Soil Patches. II. Hyphae Exploiting Root-Free Soil	1996	>2.9	Sandy			Agropyron desertorum	Poaceae	Fibrous	Perennial	120	4	27	1	Glomus sp.	Glomeraceae	Rhizophilic guild	1.81093	0.140846	0.0495661	-0.173216	0.0202824	-0.0451941	0.0278644
271	641	Fly ash mycorrhizoremediation through Paspalum scrobiculatum L., inoculated with Rhizophagus fasciculatus	2015	>2.9	Sandy		Alkaline	Paspalum scrobiculatum	Poaceae	Fibrous	Annual	90	3	45	>1	Mixed	Mixed	Mixed	0.17	0.267038	7.04e-05	0.518563	0.000911637	0.306756	0.000137564
272	642	Friend or Foe- Light Availability Determines the Relationship between Mycorrhizal Fungi, Rhizobia and Lima Bean ( Phaseolus lunatus L.)	2016	1_2.9	Sandy			Phaseolus lunatus	Fabaceae	Taproot	Annual	98	15	16.2	>1	Mixed	Mixed	Mixed	0.425807	0.123236	0.00056343	-0.0763516	0.00256791	0.0676873	0.000964296
273	643	Fruit production and quality of tomato plants (Solanum lycopersicum L.) are affected by green compost and arbuscular mycorrhizal fungi	2014	>2.9	Sandy	No_P_deficient	Acidic	Solanum lycopersicum	Solanaceae	Fibrous	Annual	150	10	37	>1	Mixed	Mixed	Mixed	0.209544	1.27678	0.0272889	1.4671	0.0569331	1.31245	0.0321916
274	644	Functional characterization of LePT4: a phosphate transporter in tomato with mycorrhiza-enhanced expression	2007	>2.9	Sandy	P_deficent		Solanum lycopersicum	Solanaceae	Fibrous	Annual	50	5	65	1	Rhizophagus intraradices	Glomeraceae	Rhizophilic guild	0.266667	0.470004	0.004	0.594707	0.004	0.49758	0.004
275	645	Geographic isolates of Glomus increase root growth and whole-plant transpiration of Citrus seedlings grown with high phosphorus	2001		Sandy	No_P_deficient	Neutral	Citrus volkameriana	Rutaceae	Taproot	Perennial	75	10	76	1	Glomus sp.	Glomeraceae	Rhizophilic guild	0.382716	0.0540672	0.002	0.190354	0.002	0.0936855	0.002
275	646	Geographic isolates of Glomus increase root growth and whole-plant transpiration of Citrus seedlings grown with high phosphorus	2001		Sandy	No_P_deficient	Neutral	Citrus volkameriana	Rutaceae	Taproot	Perennial	75	10	11	1	Funneliformis mosseae	Glomeraceae	Rhizophilic guild	0.382716	-0.00619197	0.002	0.149532	0.002	0.0393924	0.002
275	647	Geographic isolates of Glomus increase root growth and whole-plant transpiration of Citrus seedlings grown with high phosphorus	2001		Sandy	No_P_deficient	Neutral	Citrus volkameriana	Rutaceae	Taproot	Perennial	75	10	47	1	Funneliformis mosseae	Glomeraceae	Rhizophilic guild	0.382716	0	0.002	0.229574	0.002	0.0689929	0.002
275	648	Geographic isolates of Glomus increase root growth and whole-plant transpiration of Citrus seedlings grown with high phosphorus	2001		Sandy	No_P_deficient	Neutral	Citrus volkameriana	Rutaceae	Taproot	Perennial	75	10	58	1	Rhizophagus intraradices	Glomeraceae	Rhizophilic guild	0.382716	0.0243915	0.002	0.190354	0.002	0.0731509	0.002
276	649	Glomus fasciculatum inoculation improves soybean production	2005	>2.9	No_sandy		Neutral	Glycine max	Fabaceae	Taproot	Annual	120	3	71.7	1	Rhizophagus fasciculatus	Glomeraceae	Rhizophilic guild	0.68306	0.446506	0.00666667	0.788457	0.00666667	0.599621	0.00666667
277	650	Glomus mosseae associated bacteria and their influence on stimulation of mycorrhizal colonization, sporulation, and growth promotion in guava (Psidium guajava L.) seedlings	2012	1_2.9	No_sandy			Psidium guajava	Other	Taproot	Perennial	300	5	58.4	1	Funneliformis mosseae	Glomeraceae	Rhizophilic guild	0.422811	0.225905	0.004	0.153761	0.004	0.205004	0.004
278	651	Glomus mosseae enhances root growth and Cu and Pb acquisition of upland rice (Oryza sativa L.) in contaminated soils	2014	<1	No_sandy	No_P_deficient	Acidic	Oryza sativa	Poaceae	Fibrous	Annual	56	3	69	1	Funneliformis mosseae	Glomeraceae	Rhizophilic guild	0.281046	-0.0746109	0.00149061	0.190044	0.0158322	-0.0102565	0.00340795
279	652	Greenhouse inoculation of psammophilic plant species with arbuscular mycorrhizal fungi to improve survival and early growth	2011	1_2.9	Sandy	P_deficent		Ammophila arenaria	Poaceae	Fibrous	Perennial	180	25	84	1	Rhizophagus intraradices	Glomeraceae	Rhizophilic guild	0.482143	2.93973	0.0008	3.51871	0.0008	3.16695	0.0008
279	653	Greenhouse inoculation of psammophilic plant species with arbuscular mycorrhizal fungi to improve survival and early growth	2011	1_2.9	Sandy	P_deficent		Ammophila arenaria	Poaceae	Fibrous	Perennial	180	25	92	>1	Mixed	Mixed	Mixed	0.482143	2.26622	0.0008	3.21293	0.0008	2.68036	0.0008
279	654	Greenhouse inoculation of psammophilic plant species with arbuscular mycorrhizal fungi to improve survival and early growth	2011	1_2.9	Sandy	P_deficent		Ammophila maritima	Poaceae	Fibrous	Perennial	180	25	87	>1	Mixed	Mixed	Mixed	0.525907	0.502501	0.0008	0.837397	0.0008	0.630983	0.0008
279	655	Greenhouse inoculation of psammophilic plant species with arbuscular mycorrhizal fungi to improve survival and early growth	2011	1_2.9	Sandy	P_deficent		Ammophila maritima	Poaceae	Fibrous	Perennial	180	25	41	1	Rhizophagus intraradices	Glomeraceae	Rhizophilic guild	0.764786	0.0891701	0.0008	0.16975	0.0008	0.12489	0.0008
279	656	Greenhouse inoculation of psammophilic plant species with arbuscular mycorrhizal fungi to improve survival and early growth	2011	1_2.9	Sandy	P_deficent		Crucianella maritima	Other	Fibrous	Perennial	180	25	11	1	Rhizophagus intraradices	Glomeraceae	Rhizophilic guild	0.404167	0.639658	0.0008	0.391624	0.0008	0.574344	0.0008
279	657	Greenhouse inoculation of psammophilic plant species with arbuscular mycorrhizal fungi to improve survival and early growth	2011	1_2.9	Sandy	P_deficent		Crucianella maritima	Other	Fibrous	Perennial	180	25	83	>1	Mixed	Mixed	Mixed	0.764786	0.2929	0.0008	0.29243	0.0008	0.292697	0.0008
279	658	Greenhouse inoculation of psammophilic plant species with arbuscular mycorrhizal fungi to improve survival and early growth	2011	1_2.9	Sandy	P_deficent		Dorycnium pentaphyllum	Fabaceae	Fibrous	Perennial	180	25	86	1	Rhizophagus intraradices	Glomeraceae	Rhizophilic guild	1.01667	2.83027	0.0008	2.44163	0.0008	2.65313	0.0008
279	659	Greenhouse inoculation of psammophilic plant species with arbuscular mycorrhizal fungi to improve survival and early growth	2011	1_2.9	Sandy	P_deficent		Dorycnium pentaphyllum	Fabaceae	Fibrous	Perennial	180	25	79	>1	Mixed	Mixed	Mixed	1.01667	2.8792	0.0008	2.45016	0.0008	2.68577	0.0008
279	660	Greenhouse inoculation of psammophilic plant species with arbuscular mycorrhizal fungi to improve survival and early growth	2011	1_2.9	Sandy	P_deficent		Elymus farctus	Poaceae	Fibrous	Perennial	180	25	43	1	Rhizophagus intraradices	Glomeraceae	Rhizophilic guild	0.230769	2.35746	0.0008	2.44235	0.0008	2.37394	0.0008
279	661	Greenhouse inoculation of psammophilic plant species with arbuscular mycorrhizal fungi to improve survival and early growth	2011	1_2.9	Sandy	P_deficent		Elymus farctus	Poaceae	Fibrous	Perennial	180	25	79	1	Rhizophagus intraradices	Glomeraceae	Rhizophilic guild	0.525907	0.2314	0.0008	0.165347	0.0008	0.209124	0.0008
279	662	Greenhouse inoculation of psammophilic plant species with arbuscular mycorrhizal fungi to improve survival and early growth	2011	1_2.9	Sandy	P_deficent		Genista umbellata	Fabaceae	Taproot	Perennial	180	25	85	1	Rhizophagus intraradices	Glomeraceae	Rhizophilic guild	0.571429	4.47245	0.0008	4.19344	0.0008	4.37975	0.0008
279	663	Greenhouse inoculation of psammophilic plant species with arbuscular mycorrhizal fungi to improve survival and early growth	2011	1_2.9	Sandy	P_deficent		Genista umbellata	Fabaceae	Taproot	Perennial	180	25	32	>1	Mixed	Mixed	Mixed	0.571429	4.81335	0.0008	4.85398	0.0008	4.82831	0.0008
279	664	Greenhouse inoculation of psammophilic plant species with arbuscular mycorrhizal fungi to improve survival and early growth	2011	1_2.9	Sandy	P_deficent		Glaucium flavum	Other	Taproot	Perennial	180	25	7	>1	Mixed	Mixed	Mixed	0.437776	-0.309994	0.0008	-0.0495969	0.0008	-0.223297	0.0008
279	665	Greenhouse inoculation of psammophilic plant species with arbuscular mycorrhizal fungi to improve survival and early growth	2011	1_2.9	Sandy	P_deficent		Halimium halimifolium	Other	Taproot	Perennial	180	25	79	1	Rhizophagus intraradices	Glomeraceae	Rhizophilic guild	0.774194	2.6808	0.0008	2.12525	0.0008	2.47501	0.0008
279	666	Greenhouse inoculation of psammophilic plant species with arbuscular mycorrhizal fungi to improve survival and early growth	2011	1_2.9	Sandy	P_deficent		Halimium halimifolium	Other	Taproot	Perennial	180	25	76	>1	Mixed	Mixed	Mixed	0.774194	3.04836	0.0008	2.25567	0.0008	2.77543	0.0008
279	667	Greenhouse inoculation of psammophilic plant species with arbuscular mycorrhizal fungi to improve survival and early growth	2011	1_2.9	Sandy	P_deficent		Limoniastrum monopetalum	Other	Fibrous	Perennial	180	25	13	1	Rhizophagus intraradices	Glomeraceae	Rhizophilic guild	0.0325203	-0.0184621	0.0008	0.77319	0.0008	0.0188501	0.0008
279	668	Greenhouse inoculation of psammophilic plant species with arbuscular mycorrhizal fungi to improve survival and early growth	2011	1_2.9	Sandy	P_deficent		Limoniastrum monopetalum	Other	Fibrous	Perennial	180	25	9	1	Rhizophagus intraradices	Glomeraceae	Rhizophilic guild	0.437776	-0.15636	0.0008	0.0831396	0.0008	-0.0771821	0.0008
279	669	Greenhouse inoculation of psammophilic plant species with arbuscular mycorrhizal fungi to improve survival and early growth	2011	1_2.9	Sandy	P_deficent		Lotus creticus	Fabaceae	Fibrous	Perennial	180	25	85	1	Rhizophagus intraradices	Glomeraceae	Rhizophilic guild	0.925926	4.41482	0.0008	3.30175	0.0008	4.02501	0.0008
279	670	Greenhouse inoculation of psammophilic plant species with arbuscular mycorrhizal fungi to improve survival and early growth	2011	1_2.9	Sandy	P_deficent		Lotus creticus	Fabaceae	Fibrous	Perennial	180	25	80	>1	Mixed	Mixed	Mixed	0.925926	3.79923	0.0008	3.1144	0.0008	3.52693	0.0008
279	671	Greenhouse inoculation of psammophilic plant species with arbuscular mycorrhizal fungi to improve survival and early growth	2011	1_2.9	Sandy	P_deficent		Medicago marina	Fabaceae	Taproot	Perennial	180	25	93	1	Rhizophagus intraradices	Glomeraceae	Rhizophilic guild	0.240343	1.88198	0.0008	1.96861	0.0008	1.89937	0.0008
279	672	Greenhouse inoculation of psammophilic plant species with arbuscular mycorrhizal fungi to improve survival and early growth	2011	1_2.9	Sandy	P_deficent		Medicago marina	Fabaceae	Taproot	Perennial	180	25	80	>1	Mixed	Mixed	Mixed	0.240343	2.21002	0.0008	2.12312	0.0008	2.19376	0.0008
279	673	Greenhouse inoculation of psammophilic plant species with arbuscular mycorrhizal fungi to improve survival and early growth	2011	1_2.9	Sandy	P_deficent		Ononis natrix	Fabaceae	Taproot	Perennial	180	25	86	1	Rhizophagus intraradices	Glomeraceae	Rhizophilic guild	0.430693	2.76107	0.0008	2.753	0.0008	2.75865	0.0008
279	674	Greenhouse inoculation of psammophilic plant species with arbuscular mycorrhizal fungi to improve survival and early growth	2011	1_2.9	Sandy	P_deficent		Ononis natrix	Fabaceae	Taproot	Perennial	180	25	86	>1	Mixed	Mixed	Mixed	0.430693	1.30646	0.0008	2.16609	0.0008	1.65012	0.0008
279	675	Greenhouse inoculation of psammophilic plant species with arbuscular mycorrhizal fungi to improve survival and early growth	2011	1_2.9	Sandy	P_deficent		Otanthus maritimus	Asteraceae	Taproot	Perennial	180	25	38	>1	Mixed	Mixed	Mixed	0.311475	-0.175285	0.0008	-0.0669706	0.0008	-0.148478	0.0008
279	676	Greenhouse inoculation of psammophilic plant species with arbuscular mycorrhizal fungi to improve survival and early growth	2011	1_2.9	Sandy	P_deficent		Thymbra capitata	Other	Taproot	Perennial	180	25	78	1	Rhizophagus intraradices	Glomeraceae	Rhizophilic guild	1.33333	4.98816	0.0008	4.29898	0.0008	4.65328	0.0008
279	677	Greenhouse inoculation of psammophilic plant species with arbuscular mycorrhizal fungi to improve survival and early growth	2011	1_2.9	Sandy	P_deficent		Thymbra capitata	Other	Taproot	Perennial	180	25	84	>1	Mixed	Mixed	Mixed	1.33333	5.18365	0.0008	4.37418	0.0008	4.80226	0.0008
280	678	Greenhouse response of micropropagated bananas inoculated with in vitro monoxenically produced arbuscular mycorrhizal fungi	2001	<1	Sandy	No_P_deficient	Neutral	Musa acuminata	Other	Fibrous	Perennial	42	9	96	1	Rhizophagus intraradices	Glomeraceae	Rhizophilic guild	0.666667	0.696613	0.112114	0.628609	0.397072	0.669964	0.200175
281	679	Growth and metal accumulation of mycorrhizal sorghum exposed to elevated copper and zinc	2005	1_2.9	Sandy			Sorghum bicolor	Poaceae	Fibrous	Annual	56	4	62.6	>1	Mixed	Mixed	Mixed	2.14312	0.0839742	0.0194987	-0.235633	0.0537329	-0.122471	0.0388842
282	680	Growth and mycorrhizal dependency of Acacia mangium Willd. inoculated with three vesicular arbuscular mycorrhizal fungi in lateritic soil	2006	1_2.9	Sandy	No_P_deficient	Acidic	Acacia mangium	Fabaceae	Taproot	Perennial	270	7	50	1	Glomus aggregatum	Glomeraceae	Rhizophilic guild	0.966102	1.01314	0.00285714	-0.0918075	0.00285714	0.61472	0.00285714
282	681	Growth and mycorrhizal dependency of Acacia mangium Willd. inoculated with three vesicular arbuscular mycorrhizal fungi in lateritic soil	2006	1_2.9	Sandy	No_P_deficient	Acidic	Acacia mangium	Fabaceae	Taproot	Perennial	270	7	65	1	Paraglomus occultum	Paraglomeraceae	Rhizophilic guild	0.966102	1.2814	0.00285714	0.0173917	0.00285714	0.846682	0.00285714
282	682	Growth and mycorrhizal dependency of Acacia mangium Willd. inoculated with three vesicular arbuscular mycorrhizal fungi in lateritic soil	2006	1_2.9	Sandy	No_P_deficient	Acidic	Acacia mangium	Fabaceae	Taproot	Perennial	270	7	56	1	Funneliformis mosseae	Glomeraceae	Rhizophilic guild	0.966102	1.04643	0.00285714	-0.111226	0.00285714	0.635482	0.00285714
283	683	Growth and nutrient uptake of arbuscular mycorrhizal maize in different depths of soil overlying coal fly ash	2005	>2.9	Sandy	P_deficent	Alkaline	Zea mays	Poaceae	Fibrous	Annual	56	5	39.4	1	Funneliformis mosseae	Glomeraceae	Rhizophilic guild	0.488889	0.364643	0.004	2.41022	0.004	1.53123	0.004
283	684	Growth and nutrient uptake of arbuscular mycorrhizal maize in different depths of soil overlying coal fly ash	2005	>2.9	Sandy	P_deficent	Alkaline	Zea mays	Poaceae	Fibrous	Annual	56	5	45.5	1	Diversispora versiformis	Diversisporaceae	Edaphophilic guild	0.488889	-0.0224729	0.004	2.01974	0.004	1.14146	0.004
284	685	Growth and physiological responses to arbuscular mycorrhizal fungi and salt stress in dioecious plant Populus tomentosa	2014	>2.9	No_sandy	No_P_deficient	Neutral	Populus tomentosa	Other	Taproot	Perennial	135	20	62.13	1	Glomus constrictum	Glomeraceae	Rhizophilic guild	0.646825	0.130634	0.000560592	0.111172	0.00172981	0.123035	0.000825587
284	686	Growth and physiological responses to arbuscular mycorrhizal fungi and salt stress in dioecious plant Populus tomentosa	2014	>2.9	No_sandy	No_P_deficient	Neutral	Populus tomentosa	Other	Taproot	Perennial	135	20	65.45	1	Glomus constrictum	Glomeraceae	Rhizophilic guild	0.704433	0.170998	0.000291443	0.187967	0.00267951	0.178046	0.000661941
285	687	Growth and root colonization of mycorrhizal maize grown on acid and alkaline soil	1996	<1	Sandy	P_deficent	Acidic	Zea mays	Poaceae	Fibrous	Annual	30	5	78.335	1	Claroideoglomus etunicatum	Claroideoglomeraceae	Rhizophilic guild	0.473569	0.503297	0.004	0.657373	0.004	0.555448	0.004
285	688	Growth and root colonization of mycorrhizal maize grown on acid and alkaline soil	1996	<1	Sandy	P_deficent	Acidic	Zea mays	Poaceae	Fibrous	Annual	30	5	22.5535	1	Glomus diaphanum	Glomeraceae	Rhizophilic guild	0.473569	0.374346	0.004	0.426617	0.004	0.391444	0.004
285	689	Growth and root colonization of mycorrhizal maize grown on acid and alkaline soil	1996	<1	Sandy	P_deficent	Acidic	Zea mays	Poaceae	Fibrous	Annual	30	5	48.1384	1	Rhizophagus intraradices	Glomeraceae	Rhizophilic guild	0.473569	0.24873	0.004	0.00181034	0.004	0.175819	0.004
285	690	Growth and root colonization of mycorrhizal maize grown on acid and alkaline soil	1996	<1	Sandy	P_deficent	Acidic	Zea mays	Poaceae	Fibrous	Annual	30	5	74.996	1	Claroideoglomus etunicatum	Claroideoglomeraceae	Rhizophilic guild	0.605146	0.520149	0.004	0.835273	0.004	0.650873	0.004
285	691	Growth and root colonization of mycorrhizal maize grown on acid and alkaline soil	1996	<1	Sandy	P_deficent	Acidic	Zea mays	Poaceae	Fibrous	Annual	30	5	40.8295	1	Glomus diaphanum	Glomeraceae	Rhizophilic guild	0.605146	0.373829	0.004	0.334841	0.004	0.359308	0.004
285	692	Growth and root colonization of mycorrhizal maize grown on acid and alkaline soil	1996	<1	Sandy	P_deficent	Acidic	Zea mays	Poaceae	Fibrous	Annual	30	5	47.1614	1	Rhizophagus intraradices	Glomeraceae	Rhizophilic guild	0.605146	0.398654	0.004	0.386555	0.004	0.39411	0.004
285	693	Growth and root colonization of mycorrhizal maize grown on acid and alkaline soil	1996	<1	Sandy	P_deficent	Alkaline	Zea mays	Poaceae	Fibrous	Annual	30	5	35.2781	1	Claroideoglomus etunicatum	Claroideoglomeraceae	Rhizophilic guild	0.739421	0.488274	0.004	0.796628	0.004	0.631107	0.004
285	694	Growth and root colonization of mycorrhizal maize grown on acid and alkaline soil	1996	<1	Sandy	P_deficent	Alkaline	Zea mays	Poaceae	Fibrous	Annual	30	5	51.4831	1	Glomus diaphanum	Glomeraceae	Rhizophilic guild	0.739421	0.463692	0.004	0.811325	0.004	0.626421	0.004
285	695	Growth and root colonization of mycorrhizal maize grown on acid and alkaline soil	1996	<1	Sandy	P_deficent	Alkaline	Zea mays	Poaceae	Fibrous	Annual	30	5	28.1884	1	Rhizophagus intraradices	Glomeraceae	Rhizophilic guild	0.739421	0.661747	0.004	0.901506	0.004	0.77076	0.004
285	696	Growth and root colonization of mycorrhizal maize grown on acid and alkaline soil	1996	<1	Sandy	P_deficent	Alkaline	Zea mays	Poaceae	Fibrous	Annual	30	5	44.8273	1	Claroideoglomus etunicatum	Claroideoglomeraceae	Rhizophilic guild	0.887846	0.698787	0.004	0.925188	0.004	0.811662	0.004
285	697	Growth and root colonization of mycorrhizal maize grown on acid and alkaline soil	1996	<1	Sandy	P_deficent	Alkaline	Zea mays	Poaceae	Fibrous	Annual	30	5	54.0775	1	Glomus diaphanum	Glomeraceae	Rhizophilic guild	0.887846	0.750276	0.004	0.973263	0.004	0.861354	0.004
285	698	Growth and root colonization of mycorrhizal maize grown on acid and alkaline soil	1996	<1	Sandy	P_deficent	Alkaline	Zea mays	Poaceae	Fibrous	Annual	30	5	24.8801	1	Rhizophagus intraradices	Glomeraceae	Rhizophilic guild	0.887846	0.706212	0.004	0.817724	0.004	0.760207	0.004
286	699	Growth and Some Physiological Activities of Pepper (Capsicum annuum L.) in Response to Cadmium Stress and Mycorrhizal Symbiosis	2013	1_2.9	Sandy	No_P_deficient	Neutral	Capsicum annuum	Solanaceae	Fibrous	Annual	56	5	65	1	Funneliformis mosseae	Glomeraceae	Rhizophilic guild	0.328467	0.403029	0.004	0.367725	0.004	0.394415	0.004
287	700	Growth and yield of lentil and wheat inoculated with three Glomus isolates from Saskatchewan soils	1994	1_2.9	Sandy	No_P_deficient	Alkaline	Lens esculenta	Fabaceae	Taproot	Annual	100	4	73	1	Rhizophagus clarus	Glomeraceae	Rhizophilic guild	0.508072	0.356942	0.005	-0.542303	0.005	0.134018	0.005
287	701	Growth and yield of lentil and wheat inoculated with three Glomus isolates from Saskatchewan soils	1994	1_2.9	Sandy	No_P_deficient	Alkaline	Lens esculenta	Fabaceae	Taproot	Annual	100	4	39	1	Funneliformis mosseae	Glomeraceae	Rhizophilic guild	0.508072	0.120049	0.005	-0.195432	0.005	0.0244703	0.005
287	702	Growth and yield of lentil and wheat inoculated with three Glomus isolates from Saskatchewan soils	1994	1_2.9	Sandy	No_P_deficient	Alkaline	Lens esculenta	Fabaceae	Taproot	Annual	100	4	66	1	Diversispora versiformis	Diversisporaceae	Edaphophilic guild	0.508072	0.193818	0.005	-0.214124	0.005	0.0740701	0.005
287	703	Growth and yield of lentil and wheat inoculated with three Glomus isolates from Saskatchewan soils	1994	1_2.9	Sandy	No_P_deficient	Alkaline	Lens esculenta	Fabaceae	Taproot	Annual	100	4	70	>1	Mixed	Mixed	Mixed	0.508072	0.201374	0.005	-0.467486	0.005	0.021877	0.005
287	704	Growth and yield of lentil and wheat inoculated with three Glomus isolates from Saskatchewan soils	1994	1_2.9	Sandy	No_P_deficient	Alkaline	Triticum aestivum	Poaceae	Fibrous	Annual	83	4	29	1	Rhizophagus clarus	Glomeraceae	Rhizophilic guild	0.306054	0.0524975	0.005	-0.22419	0.005	-0.00581059	0.005
287	705	Growth and yield of lentil and wheat inoculated with three Glomus isolates from Saskatchewan soils	1994	1_2.9	Sandy	No_P_deficient	Alkaline	Triticum aestivum	Poaceae	Fibrous	Annual	83	4	20	1	Funneliformis mosseae	Glomeraceae	Rhizophilic guild	0.306054	0.0488456	0.005	-0.0328659	0.005	0.0302881	0.005
287	706	Growth and yield of lentil and wheat inoculated with three Glomus isolates from Saskatchewan soils	1994	1_2.9	Sandy	No_P_deficient	Alkaline	Triticum aestivum	Poaceae	Fibrous	Annual	83	4	32	>1	Mixed	Mixed	Mixed	0.306054	0.0397131	0.005	-0.122024	0.005	0.0040918	0.005
288	707	Growth Effects of the Vesicular-Arbuscular Mycorrhizal Fungus Glomus constrictum on Maize Plants in Pot Trials	1995	1_2.9	Sandy	P_deficent	Neutral	Zea mays	Poaceae	Fibrous	Annual	28	3	32	1	Glomus constrictum	Glomeraceae	Rhizophilic guild	0.121951	0.429563	0.00666667	0.182322	0.00666667	0.405465	0.00666667
289	708	Growth enhancement and Phytophthora blight (Phytophthora capsici Leonian) control by arbuscular mycorrhizal fungal inoculation in pepper	2007	1_2.9	No_sandy			Capsicum annuum	Solanaceae	Fibrous	Annual	28	4	65.7	1	Funneliformis mosseae	Glomeraceae	Rhizophilic guild	0.128913	0.19671	0.005	0.301914	0.005	0.209299	0.005
289	709	Growth enhancement and Phytophthora blight (Phytophthora capsici Leonian) control by arbuscular mycorrhizal fungal inoculation in pepper	2007	1_2.9	No_sandy			Capsicum annuum	Solanaceae	Fibrous	Annual	28	4	63	1	Claroideoglomus etunicatum	Claroideoglomeraceae	Rhizophilic guild	0.128913	0.141651	0.005	0.152945	0.005	0.142947	0.005
289	710	Growth enhancement and Phytophthora blight (Phytophthora capsici Leonian) control by arbuscular mycorrhizal fungal inoculation in pepper	2007	1_2.9	No_sandy			Capsicum annuum	Solanaceae	Fibrous	Annual	28	4	68.1	1	Rhizophagus fasciculatus	Glomeraceae	Rhizophilic guild	0.128913	0.231802	0.005	0.242847	0.005	0.233069	0.005
289	711	Growth enhancement and Phytophthora blight (Phytophthora capsici Leonian) control by arbuscular mycorrhizal fungal inoculation in pepper	2007	1_2.9	No_sandy			Capsicum annuum	Solanaceae	Fibrous	Annual	28	4	61.3	1	Gigaspora margarita	Gigasporaceae	Edaphophilic guild	0.128913	0.282232	0.005	0.461749	0.005	0.304439	0.005
290	712	Growth media and mycorrhizal species effect on acclimatization and nutrient uptake of banana plantlets	2017	>2.9	Sandy	No_P_deficient	Alkaline	Musa nana	Other	Fibrous	Perennial	102	4	55.3	1	Funneliformis caledonium	Glomeraceae	Rhizophilic guild	1.10804	0.592733	0.196194	0.434665	0.0423069	0.512769	0.101374
290	713	Growth media and mycorrhizal species effect on acclimatization and nutrient uptake of banana plantlets	2017	>2.9	Sandy	No_P_deficient	Alkaline	Musa nana	Other	Fibrous	Perennial	102	4	71.2	1	Glomus macrocarpum	Glomeraceae	Rhizophilic guild	1.10804	0.6221	0.225655	0.211135	0.0949536	0.427143	0.144644
291	714	Growth of mycorrhizal tomato and mineral acquisition under salt stress	2000	>2.9	Sandy	No_P_deficient	Alkaline	Cicer arietinum	Fabaceae	Taproot	Annual	42	4	49	1	Funneliformis mosseae	Glomeraceae	Rhizophilic guild	0.123457	0.363442	0.005	0.336472	0.005	0.360514	0.005
292	715	Growth performance and rhizospheric traits of peach (Prunus persica) in response to mycorrhization on replant versus non-replant soil	2015	1_2.9	Sandy			Prunus persica	Other	Taproot	Perennial	116	4	80.3	1	Funneliformis mosseae	Glomeraceae	Rhizophilic guild	0.342146	0.204622	0.011606	0.189869	0.00545784	0.200881	0.0094538
292	716	Growth performance and rhizospheric traits of peach (Prunus persica) in response to mycorrhization on replant versus non-replant soil	2015	1_2.9	Sandy			Prunus persica	Other	Taproot	Perennial	116	4	54.2	1	Funneliformis mosseae	Glomeraceae	Rhizophilic guild	0.358047	0.20747	0.00385052	0.19653	0.00232165	0.204597	0.00335253
293	717	Growth promoting characteristics of rhizobacteria and AM Fungi for biomass amelioration of Zea mays	2015	<1	Sandy	No_P_deficient	Alkaline	Zea mays	Poaceae	Fibrous	Annual	48	8		>1	Mixed	Mixed	Mixed	0.842375	0.347822	0.000906655	0.351354	0.000682952	0.349438	0.000771089
294	718	Growth response and dependency of endangered nedun tree species (Pericopsis mooniana) affected by indigenous Arbuscular Mycorrhizal Fungi inoculation	2017	>2.9	Sandy			Pericopsis mooniana	Fabaceae	Taproot	Perennial	90	5	37.8	1	Claroideoglomus etunicatum	Claroideoglomeraceae	Rhizophilic guild	0.294703	0.943839	0.0527528	0.917435	0.0750717	0.93789	0.0478465
294	719	Growth response and dependency of endangered nedun tree species (Pericopsis mooniana) affected by indigenous Arbuscular Mycorrhizal Fungi inoculation	2017	>2.9	Sandy			Pericopsis mooniana	Fabaceae	Taproot	Perennial	90	5	33.3	1	Glomus sp.	Glomeraceae	Rhizophilic guild	0.294703	1.2182	0.0133612	1.18943	0.0669468	1.21172	0.00897855
294	720	Growth response and dependency of endangered nedun tree species (Pericopsis mooniana) affected by indigenous Arbuscular Mycorrhizal Fungi inoculation	2017	>2.9	Sandy			Pericopsis mooniana	Fabaceae	Taproot	Perennial	90	5	33.3	1	Glomus sp.	Glomeraceae	Rhizophilic guild	0.294703	0.913083	0.0882284	0.958645	0.0869162	0.923638	0.0635877
294	721	Growth response and dependency of endangered nedun tree species (Pericopsis mooniana) affected by indigenous Arbuscular Mycorrhizal Fungi inoculation	2017	>2.9	Sandy			Pericopsis mooniana	Fabaceae	Taproot	Perennial	90	5	24.4	>1	Mixed	Glomeraceae	Rhizophilic guild	0.294703	1.05731	0.0937671	1.00033	0.107052	1.04463	0.093139
295	722	Growth response and phosphorus uptake by arbuscular mycorrhizae of wet prairie sawgrass	2003	<1	No_sandy			Cladium jamaicense	Other	Fibrous	Perennial	102	6		>1	Mixed	Mixed	Mixed	1.35714	0.728239	0.00333333	1.09861	0.00333333	0.95784	0.00333333
295	723	Growth response and phosphorus uptake by arbuscular mycorrhizae of wet prairie sawgrass	2003	<1	No_sandy			Cladium jamaicense	Other	Fibrous	Perennial	102	6		>1	Mixed	Mixed	Mixed	1.625	0.17185	0.00333333	0.109199	0.00333333	0.133531	0.00333333
296	724	Growth responses and endogenous IAA and iPAs changes of litchi (Litchi chinensis Sonn.) seedlings induced by arbuscular mycorrhizal fungal inoculation	2005	<1	No_sandy			Litchi chinensis	Other	Taproot	Perennial	240	4	9	1	Rhizophagus intraradices	Glomeraceae	Rhizophilic guild	0.351792	0.210688	0.005	0.294603	0.005	0.233213	0.005
296	725	Growth responses and endogenous IAA and iPAs changes of litchi (Litchi chinensis Sonn.) seedlings induced by arbuscular mycorrhizal fungal inoculation	2005	<1	No_sandy			Litchi chinensis	Other	Taproot	Perennial	240	4	18.5	1	Gigaspora margarita	Gigasporaceae	Edaphophilic guild	0.351792	0.311023	0.005	0.482655	0.005	0.358601	0.005
296	726	Growth responses and endogenous IAA and iPAs changes of litchi (Litchi chinensis Sonn.) seedlings induced by arbuscular mycorrhizal fungal inoculation	2005	<1	No_sandy			Litchi chinensis	Other	Taproot	Perennial	240	4	18.8	>1	Mixed	Mixed	Mixed	0.351792	0.192046	0.005	0	0.005	0.145508	0.005
297	727	Growth responses and N and P use efficiency of three Alnus species as affected by arbuscular-mycorrhizal colonisation	2001	1_2.9	Sandy	No_P_deficient	Alkaline	Alnus cordata	Other	Taproot	Perennial	56	7	75	1	Funneliformis mosseae	Glomeraceae	Rhizophilic guild	0.261538	3.2096	0.00285714	3.23521	0.00285714	3.21497	0.00285714
297	728	Growth responses and N and P use efficiency of three Alnus species as affected by arbuscular-mycorrhizal colonisation	2001	1_2.9	Sandy	No_P_deficient	Alkaline	Alnus cordata	Other	Taproot	Perennial	56	7	85	1	Rhizophagus intraradices	Glomeraceae	Rhizophilic guild	0.261538	2.90732	0.00285714	2.34294	0.00285714	2.81365	0.00285714
297	729	Growth responses and N and P use efficiency of three Alnus species as affected by arbuscular-mycorrhizal colonisation	2001	1_2.9	Sandy	No_P_deficient	Alkaline	Alnus glutinosa	Other	Taproot	Perennial	56	7	85	1	Funneliformis mosseae	Glomeraceae	Rhizophilic guild	0.25	2.68528	0.00285714	2.46721	0.00285714	2.6453	0.00285714
297	730	Growth responses and N and P use efficiency of three Alnus species as affected by arbuscular-mycorrhizal colonisation	2001	1_2.9	Sandy	No_P_deficient	Alkaline	Alnus glutinosa	Other	Taproot	Perennial	56	7	87	1	Rhizophagus intraradices	Glomeraceae	Rhizophilic guild	0.25	2.81604	0.00285714	2.64406	0.00285714	2.78393	0.00285714
297	731	Growth responses and N and P use efficiency of three Alnus species as affected by arbuscular-mycorrhizal colonisation	2001	1_2.9	Sandy	No_P_deficient	Alkaline	Alnus incana	Other	Taproot	Perennial	56	7	86	1	Funneliformis mosseae	Glomeraceae	Rhizophilic guild	0.5	5.45959	0.00285714	5.07267	0.00285714	5.34647	0.00285714
297	732	Growth responses and N and P use efficiency of three Alnus species as affected by arbuscular-mycorrhizal colonisation	2001	1_2.9	Sandy	No_P_deficient	Alkaline	Alnus incana	Other	Taproot	Perennial	56	7	83	1	Rhizophagus intraradices	Glomeraceae	Rhizophilic guild	0.5	5.73657	0.00285714	5.47563	0.00285714	5.65692	0.00285714
298	733	Growth, Cadmium Accumulation and Physiology of Marigold ( Tagetes erecta L.) as A?ected by Arbuscular Mycorrhizal Fungi	2011	1_2.9	No_sandy	No_P_deficient	Acidic	Tagetes erecta	Asteraceae	Fibrous	Annual	63	4	90	1	Rhizophagus intraradices	Glomeraceae	Rhizophilic guild	0.138721	0.212122	0.0141	0.415606	0.0128501	0.239242	0.0127263
298	734	Growth, Cadmium Accumulation and Physiology of Marigold ( Tagetes erecta L.) as A?ected by Arbuscular Mycorrhizal Fungi	2011	1_2.9	No_sandy	No_P_deficient	Acidic	Tagetes erecta	Asteraceae	Fibrous	Annual	63	4	44	1	Glomus constrictum	Glomeraceae	Rhizophilic guild	0.138721	0.36222	0.000792224	0.558686	0.0203673	0.388323	0.00185445
298	735	Growth, Cadmium Accumulation and Physiology of Marigold ( Tagetes erecta L.) as A?ected by Arbuscular Mycorrhizal Fungi	2011	1_2.9	No_sandy	No_P_deficient	Acidic	Tagetes erecta	Asteraceae	Fibrous	Annual	63	4	32	1	Funneliformis mosseae	Glomeraceae	Rhizophilic guild	0.138721	0.393743	0.000578878	0.746903	0.0173402	0.444054	0.00139099
299	736	Growth, Mineral Acquisition, and Water Use by Mycorrhizal Wheat Grown Under Water Stress	1998	>2.9	No_sandy	P_deficent	Alkaline	Triticum durum	Poaceae	Fibrous	Annual	60	3	50	1	Glomus monosporum	Glomeraceae	Rhizophilic guild	0.397309	0.156296	0.00666667	0.291451	0.00666667	0.196619	0.00666667
299	737	Growth, Mineral Acquisition, and Water Use by Mycorrhizal Wheat Grown Under Water Stress	1999	>2.9	No_sandy	P_deficent	Alkaline	Triticum durum	Poaceae	Fibrous	Annual	60	3	37	1	Glomus monosporum	Glomeraceae	Rhizophilic guild	0.579644	0.0852147	0.00666667	0.25499	0.00666667	0.150908	0.00666667
300	738	Growth, nitrogen fixation and mineral acquisition of Alnus sieboldiana after inoculation of Frankia together with Gigaspora margarita and Pseudomonas putida	2005	<1	Sandy			Alnus sieboldiana	Other	Taproot	Perennial	150	7		1	Gigaspora margarita	Gigasporaceae	Edaphophilic guild	1.66667	0.287682	0.00285714	0.113329	0.00285714	0.182322	0.00285714
301	739	Growth response and phosphorus uptake of rye with long and short root hairs: Interactions with mycorrhizal infection	1994	1_2.9	Sandy	P_deficent	Alkaline	Secale cereale	Poaceae	Fibrous	Annual	42	4	10	1	Rhizophagus intraradices	Glomeraceae	Rhizophilic guild	0.66	0.102654	0.01244	0.434788	0.005	0.248162	0.00834094
301	740	Growth response and phosphorus uptake of rye with long and short root hairs: Interactions with mycorrhizal infection	1994	1_2.9	Sandy	P_deficent	Alkaline	Secale cereale	Poaceae	Fibrous	Annual	42	4	33	1	Rhizophagus intraradices	Glomeraceae	Rhizophilic guild	1.38	-0.625706	0.185297	-0.799369	0.005	-0.722698	0.0536659
302	741	Host genotype dependency and growth enhancing ability of VA-mycorrhizal fungi for Eleusine coracana (finger millet)	1993	1_2.9	Sandy	P_deficent	Alkaline	Eleusine coracana	Poaceae	Fibrous	Annual	60	5	68.48	1	Funneliformis caledonium	Glomeraceae	Rhizophilic guild	0.228571	0.339383	0.0147391	0.937493	0.0157586	0.481154	0.0139367
302	742	Host genotype dependency and growth enhancing ability of VA-mycorrhizal fungi for Eleusine coracana (finger millet)	1993	1_2.9	Sandy	P_deficent	Alkaline	Eleusine coracana	Poaceae	Fibrous	Annual	60	3	63.3	1	Funneliformis caledonium	Glomeraceae	Rhizophilic guild	0.333333	0.764606	0.00666667	0.476924	0.00666667	0.700068	0.00666667
302	743	Host genotype dependency and growth enhancing ability of VA-mycorrhizal fungi for Eleusine coracana (finger millet)	1993	1_2.9	Sandy	P_deficent	Alkaline	Eleusine coracana	Poaceae	Fibrous	Annual	60	3	45.6	1	Gigaspora margarita	Gigasporaceae	Edaphophilic guild	0.333333	0.575364	0.00666667	-0.117783	0.00666667	0.441833	0.00666667
302	744	Host genotype dependency and growth enhancing ability of VA-mycorrhizal fungi for Eleusine coracana (finger millet)	1993	1_2.9	Sandy	P_deficent	Alkaline	Eleusine coracana	Poaceae	Fibrous	Annual	60	3	58.7	1	Rhizophagus fasciculatus	Glomeraceae	Rhizophilic guild	0.333333	0.693147	0.00666667	0.367725	0.00666667	0.621174	0.00666667
302	745	Host genotype dependency and growth enhancing ability of VA-mycorrhizal fungi for Eleusine coracana (finger millet)	1993	1_2.9	Sandy	P_deficent	Alkaline	Eleusine coracana	Poaceae	Fibrous	Annual	60	3	60.1	1	Gigaspora calospora	Gigasporaceae	Edaphophilic guild	0.333333	0.747214	0.00666667	0.597003	0.00666667	0.711724	0.00666667
302	746	Host genotype dependency and growth enhancing ability of VA-mycorrhizal fungi for Eleusine coracana (finger millet)	1993	1_2.9	Sandy	P_deficent	Alkaline	Eleusine coracana	Poaceae	Fibrous	Annual	60	3	47	1	Funneliformis mosseae	Glomeraceae	Rhizophilic guild	0.333333	0.441833	0.00666667	0.0540672	0.00666667	0.358063	0.00666667
302	747	Host genotype dependency and growth enhancing ability of VA-mycorrhizal fungi for Eleusine coracana (finger millet)	1993	1_2.9	Sandy	P_deficent	Alkaline	Eleusine coracana	Poaceae	Fibrous	Annual	60	3	22.1	1	Glomus epigaeum	Glomeraceae	Rhizophilic guild	0.333333	0.259511	0.00666667	-0.251314	0.00666667	0.154151	0.00666667
303	748	Host Genotype Determines the Impact of Soil Phosphorus on Arbuscular Mycorrhizal Symbiosis in Maize (Zea mays L.)	2002	<1	Sandy	P_deficent	Acidic	Zea mays	Poaceae	Fibrous	Annual	42	3	42.75	>1	Mixed	Mixed	Mixed	1.07449	0.311659	0.00930944	0.374168	0.0563017	0.344523	0.0290939
304	749	Hydrolytic enzyme activities in maize (Zea mays) and sorghum (Sorghum bicolor) roots inoculated with Gluconacetobacter diazotrophicus and Glomus intraradices	2006	<1	No_sandy	P_deficent	Alkaline	Sorghum vulgare	Poaceae	Fibrous	Annual	45	10	42.3	1	Rhizophagus intraradices	Glomeraceae	Rhizophilic guild	0.78673	0.233516	0.002	-0.52702	0.002	-0.0337186	0.002
304	750	Hydrolytic enzyme activities in maize (Zea mays) and sorghum (Sorghum bicolor) roots inoculated with Gluconacetobacter diazotrophicus and Glomus intraradices	2006	<1	No_sandy	P_deficent	Alkaline	Zea mays	Poaceae	Fibrous	Annual	45	10	23.2	1	Rhizophagus intraradices	Glomeraceae	Rhizophilic guild	0.699396	-0.0916914	0.002	0	0.002	-0.0529321	0.002
305	751	Imbalanced carbon-for-phosphorus exchange between European arbuscular mycorrhizal fungi and non-native Panicum grasses—A case of dysfunctional symbiosis	2017	1_2.9	Sandy	P_deficent	Alkaline	Panicum bisulcatum	Poaceae	Fibrous	Annual	270	10	30	>1	Mixed	Mixed	Mixed	0.4477	-0.373242	0.00343658	-0.481481	0.00822469	-0.405481	0.00444753
305	752	Imbalanced carbon-for-phosphorus exchange between European arbuscular mycorrhizal fungi and non-native Panicum grasses—A case of dysfunctional symbiosis	2017	1_2.9	Sandy	P_deficent	Alkaline	Panicum maximum	Poaceae	Fibrous	Annual	270	10	75	>1	Mixed	Mixed	Mixed	0.427371	-0.280582	0.00072433	-0.355962	0.00780326	-0.302562	0.00197536
306	753	Impact of arbuscular mycorrhizal fungi (AMF) and atmospheric CO 2 concentration on the biomass production and partitioning in the forage legume alfalfa	2012	1_2.9	Sandy			Medicago sativa	Fabaceae	Taproot	Perennial	60	3	55	>1	Mixed	Mixed	Mixed	0.794393	0.209973	0.00666667	0.0289875	0.00666667	0.133857	0.00666667
307	754	Impact of arbuscular mycorrhizal fungi and Pseudomonas fluorescens on growth, physiological parameters and essential oil content in Ocimum basilicum L.	2019	1_2.9	Sandy	P_deficent		Ocimum basilicum	Other	Taproot	Annual	120	5	63	1	Acaulospora laevis	Acaulosporaceae	Ancestral guild	0.418919	0.330664	0.004	0.242313	0.004	0.305382	0.004
307	755	Impact of arbuscular mycorrhizal fungi and Pseudomonas fluorescens on growth, physiological parameters and essential oil content in Ocimum basilicum L.	2019	1_2.9	Sandy	P_deficent		Ocimum basilicum	Other	Taproot	Annual	120	5	76	1	Funneliformis mosseae	Glomeraceae	Rhizophilic guild	0.418919	1.0165	0.004	0.676887	0.004	0.927654	0.004
308	756	Impact of arbuscular mycorrhizal fungi on the growth and expression of gene encoding stress protein – metallothionein BnMT2 in the non-host crop Brassica napus L.	2014	<1	Sandy		Neutral	Brassica napus	Other	Taproot	Annual	70	20		>1	Mixed	Mixed	Mixed	0.209522	0.315415	0.000654296	0.633083	0.000421034	0.378177	0.000543303
309	757	Impact of Arbuscular Mycorrhizal Fungi with Trichoderma viride and Pseudomonas fluorescens on Growth, Yield and Oil Content in Helianthus annuus L.	2015	>2.9	Sandy	No_P_deficient	Neutral	Helianthus annuus	Asteraceae	Taproot	Annual	120	5	74.62	1	Funneliformis mosseae	Glomeraceae	Rhizophilic guild	0.136986	0.720176	0.120433	1.03851	0.00845647	0.764346	0.0962449
309	758	Impact of Arbuscular Mycorrhizal Fungi with Trichoderma viride and Pseudomonas fluorescens on Growth, Yield and Oil Content in Helianthus annuus L.	2015	>2.9	Sandy	No_P_deficient	Neutral	Helianthus annuus	Asteraceae	Taproot	Annual	120	5	49.16	1	Acaulospora laevis	Acaulosporaceae	Ancestral guild	0.136986	0.679354	0.0966884	0.936093	0.00533473	0.714012	0.0774905
309	759	Impact of Arbuscular Mycorrhizal Fungi with Trichoderma viride and Pseudomonas fluorescens on Growth, Yield and Oil Content in Helianthus annuus L.	2015	>2.9	Sandy	No_P_deficient	Neutral	Helianthus annuus	Asteraceae	Taproot	Annual	120	5	79.28	>1	Mixed	Mixed	Mixed	0.136986	0.974818	0.0609853	1.02065	0.00581938	0.980453	0.0499508
310	760	Impact of DOM from composted ‘‘alperujo’’ on soil structure, AM fungi, microbial activity and growth of Medicago sativa	2007	<1	No_sandy	No_P_deficient	Alkaline	Medicago sativa	Fabaceae	Taproot	Perennial	120	5	58.9	1	Rhizophagus intraradices	Glomeraceae	Rhizophilic guild	2.67832	0.384263	0.004	-0.234302	0.004	-0.0250254	0.004
310	761	Impact of DOM from composted ‘‘alperujo’’ on soil structure, AM fungi, microbial activity and growth of Medicago sativa	2007	<1	No_sandy	No_P_deficient	Alkaline	Medicago sativa	Fabaceae	Taproot	Perennial	120	5	51.8	>1	Mixed	Mixed	Mixed	2.67832	0.430783	0.004	-0.247591	0.004	-0.0133973	0.004
311	762	Impact of soil nitrogen concentration on Glomus spp.- Sinorhizobium interactions as affecting growth, nitrate reductase activity and protein content of Medicago sativa	2001	<1	No_sandy	P_deficent	Alkaline	Medicago sativa	Fabaceae	Taproot	Perennial	75	5	36	1	Funneliformis mosseae	Glomeraceae	Rhizophilic guild	0.856848	0.886817	0.004	1.34851	0.004	1.12643	0.004
311	763	Impact of soil nitrogen concentration on Glomus spp.- Sinorhizobium interactions as affecting growth, nitrate reductase activity and protein content of Medicago sativa	2001	<1	No_sandy	P_deficent	Alkaline	Medicago sativa	Fabaceae	Taproot	Perennial	75	5	61	1	Rhizophagus intraradices	Glomeraceae	Rhizophilic guild	0.856848	1.1045	0.004	1.82968	0.004	1.50428	0.004
312	764	Impact of the earthworm Aporrectodea trapezoides and the arbuscular mycorrhizal fungus Glomus intraradices on 15 N uptake by maize from wheat straw	2013	>2.9	Sandy	P_deficent	Alkaline	Triticum aestivum	Poaceae	Fibrous	Annual	60	4		1	Rhizophagus intraradices	Glomeraceae	Rhizophilic guild	0.23494	0.167826	0.00887569	0.300421	0.0176433	0.194443	0.0103663
313	765	Impacts of earthworms and arbuscular mycorrhizal fungi (Glomus intraradices) on plant performance are not interrelated	2009	1_2.9	Sandy		Alkaline	Lolium perenne	Poaceae	Fibrous	Perennial	84	5		1	Rhizophagus intraradices	Glomeraceae	Rhizophilic guild	2.17201	-0.190837	0.00970435	-0.283808	0.0297946	-0.253555	0.0218203
313	766	Impacts of earthworms and arbuscular mycorrhizal fungi (Glomus intraradices) on plant performance are not interrelated	2009	1_2.9	Sandy		Alkaline	Plantago lanceolata	Other	Fibrous	Perennial	84	5		1	Rhizophagus intraradices	Glomeraceae	Rhizophilic guild	0.982129	1.48722	0.265011	0.965551	0.22186	1.26232	0.241564
313	767	Impacts of earthworms and arbuscular mycorrhizal fungi (Glomus intraradices) on plant performance are not interrelated	2009	1_2.9	Sandy		Alkaline	Trifolium pratense	Fabaceae	Fibrous	Perennial	84	5		1	Rhizophagus intraradices	Glomeraceae	Rhizophilic guild	1.33346	-0.00602228	0.00678988	0.16495	0.0197708	0.0952265	0.013355
314	768	Improved Acacia senegal Growth after Inoculation with Arbuscular Mycorrhizal Fungi under Water Deficiency Conditions	2011	<1	Sandy	P_deficent	Acidic	Acacia senegal	Fabaceae	Taproot	Perennial	90	5	30.4	1	Rhizophagus intraradices	Glomeraceae	Rhizophilic guild	0.21875	0.154151	0.004	0.04652	0.004	0.135666	0.004
314	769	Improved Acacia senegal Growth after Inoculation with Arbuscular Mycorrhizal Fungi under Water Deficiency Conditions	2011	<1	Sandy	P_deficent	Acidic	Acacia senegal	Fabaceae	Taproot	Perennial	90	5	50.1	1	Rhizophagus fasciculatus	Glomeraceae	Rhizophilic guild	0.21875	0.214775	0.004	0.174353	0.004	0.207639	0.004
314	770	Improved Acacia senegal Growth after Inoculation with Arbuscular Mycorrhizal Fungi under Water Deficiency Conditions	2011	<1	Sandy	P_deficent	Acidic	Acacia senegal	Fabaceae	Taproot	Perennial	90	5	40.9	1	Funneliformis mosseae	Glomeraceae	Rhizophilic guild	0.21875	0.136132	0.004	0.251314	0.004	0.157807	0.004
315	771	Improved growth and Cu tolerance of Cu excess- stressed white clover after inoculation with arbuscular mycorrhizal fungi	2016	>2.9	No_sandy	No_P_deficient	Neutral	Trifolium repens	Fabaceae	Fibrous	Perennial	84	3	72.3	1	Rhizophagus intraradices	Glomeraceae	Rhizophilic guild	1.45672	0.114128	0.00666667	0.145625	0.00666667	0.132924	0.00666667
316	772	Improved growth of salinity-stressed soybean after inoculation with salt pre-treated mycorrhizal fungi	2007	1_2.9	Sandy	P_deficent	Alkaline	Glycine max	Fabaceae	Taproot	Annual	28	3	61	1	Claroideoglomus etunicatum	Claroideoglomeraceae	Rhizophilic guild	0.54	0.506818	0.00666667	0.510826	0.00666667	0.508225	0.00666667
317	773	Improved rooting capacity and hardening efficiency of carob (Ceratonia siliqua L.) cuttings using arbuscular mycorrhizal fungi	2017	1_2.9	Sandy		Alkaline	Ceratonia siliqua	Fabaceae	Taproot	Perennial	150	3	78.83	1	Funneliformis mosseae	Glomeraceae	Rhizophilic guild	0.271777	0.288553	0.0042605	0.633724	0.012581	0.37298	0.00591369
317	774	Improved rooting capacity and hardening efficiency of carob (Ceratonia siliqua L.) cuttings using arbuscular mycorrhizal fungi	2017	1_2.9	Sandy		Alkaline	Ceratonia siliqua	Fabaceae	Taproot	Perennial	150	3	83.33	>1	Mixed	Mixed	Mixed	0.271777	0.321932	0.00368423	0.510826	0.0130769	0.365404	0.00534455
317	775	Improved rooting capacity and hardening efficiency of carob (Ceratonia siliqua L.) cuttings using arbuscular mycorrhizal fungi	2017	1_2.9	Sandy		Alkaline	Ceratonia siliqua	Fabaceae	Taproot	Perennial	150	3	81.11	>1	Mixed	Mixed	Mixed	0.271777	0.329479	0.0302488	0.455476	0.00915597	0.35777	0.0228063
317	776	Improved rooting capacity and hardening efficiency of carob (Ceratonia siliqua L.) cuttings using arbuscular mycorrhizal fungi	2017	1_2.9	Sandy		Alkaline	Ceratonia siliqua	Fabaceae	Taproot	Perennial	150	3	87.39	>1	Mixed	Mixed	Mixed	0.271777	0.438592	0.00407169	0.570545	0.0101705	0.46829	0.00518404
318	777	Improved Tolerance of Acacia nilotica to Salt Stress by Arbuscular Mycorrhiza, Glomus fasciculatum may be Partly Related to Elevated K/Na Ratios in Root and Shoot Tissues	2007	>2.9	No_sandy	No_P_deficient	Neutral	Acacia nilotica	Fabaceae	Taproot	Perennial	45	12	90	1	Rhizophagus fasciculatus	Glomeraceae	Rhizophilic guild	0.76522	0.966125	0.0482946	0.188822	0.019163	0.699234	0.0327746
319	778	Improved tolerance of maize plants to salt stress by arbuscular mycorrhiza is related to higher accumulation of soluble sugars in roots	2002	1_2.9	Sandy			Zea mays	Poaceae	Fibrous	Annual	68	3	85	1	Funneliformis mosseae	Glomeraceae	Rhizophilic guild	0.640184	0.39258	0.00666667	0.351737	0.00666667	0.376836	0.00666667
320	779	Improved zinc tolerance in Eucalyptus globulus inoculated with Glomus deserticola and Trametes versicolor or Coriolopsis rigida	2009	<1	Sandy	P_deficent	Acidic	Eucalyptus globulus	Other	Taproot	Perennial	140	5	63	1	Glomus deserticola	Glomeraceae	Rhizophilic guild	0.378418	0.340029	0.00619874	0.483332	0.00701297	0.381459	0.0062958
321	780	Improvement of early growth of two tropical peat-swamp forest tree species Ploiarium alternifolium and Calophyllum hosei by two arbuscular mycorrhizal fungi under greenhouse conditions	2008	<1	No_sandy	P_deficent	Acidic	Calophyllum hosei	Other	Taproot	Perennial	180	15	18	1	Glomus aggregatum	Glomeraceae	Rhizophilic guild	0.333333	0.925769	0.079357	1.04982	0.0755612	0.958255	0.0774268
321	781	Improvement of early growth of two tropical peat-swamp forest tree species Ploiarium alternifolium and Calophyllum hosei by two arbuscular mycorrhizal fungi under greenhouse conditions	2008	<1	No_sandy	P_deficent	Acidic	Calophyllum hosei	Other	Taproot	Perennial	180	15	19	1	Rhizophagus clarus	Glomeraceae	Rhizophilic guild	0.333333	0.847298	0.106669	0.693147	0.0334694	0.81093	0.0860771
321	782	Improvement of early growth of two tropical peat-swamp forest tree species Ploiarium alternifolium and Calophyllum hosei by two arbuscular mycorrhizal fungi under greenhouse conditions	2008	<1	No_sandy	P_deficent	Acidic	Ploiarium alternifolium	Other	Taproot	Perennial	180	15	32	1	Glomus aggregatum	Glomeraceae	Rhizophilic guild	0.223881	0.722561	0.054583	1.10966	0.0220758	0.805495	0.0456606
321	783	Improvement of early growth of two tropical peat-swamp forest tree species Ploiarium alternifolium and Calophyllum hosei by two arbuscular mycorrhizal fungi under greenhouse conditions	2008	<1	No_sandy	P_deficent	Acidic	Ploiarium alternifolium	Other	Taproot	Perennial	180	15	27	1	Rhizophagus clarus	Glomeraceae	Rhizophilic guild	0.223881	0.822472	0.0556267	0.993252	0.0319479	0.855971	0.0475174
322	784	Improvement of some growth and yield parameters of faba bean (Vicia faba) by inoculation with Rhizobium laguerreae and arbuscular mycorrhizal fungi	2019	>2.9	Sandy	No_P_deficient	Acidic	Vicia faba	Fabaceae	Fibrous	Annual	120	8	33.8	>1	Mixed	Mixed	Mixed	0.517785	0.418093	0.0321473	0.125555	0.0441928	0.327593	0.0352528
323	785	Improvement of the soil nitrogen content and maize growth by earthworms and arbuscular mycorrhizal fungi in soils polluted by oxytetracycline	2016	1_2.9	Sandy	No_P_deficient	Alkaline	Zea mays	Poaceae	Fibrous	Annual	56	4	65	1	Rhizophagus intraradices	Glomeraceae	Rhizophilic guild	0.320664	0.0899873	0.00581683	0.370389	0.0828525	0.165639	0.0187259
324	786	Improving drought tolerance of Pistacia vera L. seedlings by arbuscular mycorrhiza under greenhouse conditions	2011	>2.9	Sandy		Neutral	Pistacia vera	Other	Taproot	Perennial	120	6	49.6	1	Claroideoglomus etunicatum	Claroideoglomeraceae	Rhizophilic guild	0.19863	0.299597	0.00333333	0.321584	0.00333333	0.303274	0.00333333
325	787	Improving growth, flower yield, and water relations of snapdragon (Antirhinum majus L.) plants grown under well-watered and water-stress conditions using arbuscular mycorrhizal fungi	2012	>2.9		P_deficent	Alkaline	Antirrhinum majus	Other	Taproot	Perennial	70	4	85.5	1	Glomus deserticola	Glomeraceae	Rhizophilic guild	0.625	0.195258	0.067942	0.242946	0.0300784	0.21387	0.0503516
326	788	Improving the acclimatization and establishment of Arundo donax L. plantlets, a promising energy crop, using a mycorrhiza-based biofertilizer	2015	<1	Sandy			Arundo donax	Poaceae	Fibrous	Perennial	46	22	35.91	>1	Mixed	Mixed	Mixed	0.5	0.470004	0.0139063	0.336472	0.015102	0.427444	0.0063348
327	789	In vitro interaction studies between Glomus intraradices and Armillaria mellea in vines	2010		Sandy			Vitis rupestris	Other	Taproot	Perennial	91	10	26	1	Rhizophagus intraradices	Glomeraceae	Rhizophilic guild	0.343693	0.506796	0.002	0.148053	0.002	0.426556	0.002
328	790	Increase of multi-metal tolerance of three leguminous plants by arbuscular mycorrhizal fungi colonization	2007	<1	No_sandy		Acidic	Medicago sativa	Fabaceae	Taproot	Perennial	42	4	35	1	Funneliformis mosseae	Glomeraceae	Rhizophilic guild	0.285613	0.63388	0.117796	0.980942	0.0884399	0.722052	0.110926
328	791	Increase of multi-metal tolerance of three leguminous plants by arbuscular mycorrhizal fungi colonization	2007	<1	No_sandy		Acidic	Sesbania cannabina	Fabaceae	Taproot	Perennial	42	4	42	1	Funneliformis mosseae	Glomeraceae	Rhizophilic guild	0.265599	0.25255	0.00378122	0.295212	0.00943939	0.261655	0.00457504
328	792	Increase of multi-metal tolerance of three leguminous plants by arbuscular mycorrhizal fungi colonization	2007	<1	No_sandy		Acidic	Sesbania rostrata	Fabaceae	Taproot	Perennial	42	4	66	1	Funneliformis mosseae	Glomeraceae	Rhizophilic guild	0.261154	0.123289	0.00233528	0.334084	0.00555491	0.170738	0.00288408
329	793	Increased maize growth and P uptake promoted by arbuscular mycorrhizal fungi coincide with higher foliar herbivory and larval biomass of the Fall Armyworm Spodoptera frugiperda	2019	1_2.9	Sandy	P_deficent	Neutral	Zea mays	Poaceae	Fibrous	Annual	56	10	37	>1	Mixed	Mixed	Mixed	0.258826	0.698471	0.0111302	0.691624	0.0192104	0.697067	0.0126073
329	794	Increased maize growth and P uptake promoted by arbuscular mycorrhizal fungi coincide with higher foliar herbivory and larval biomass of the Fall Armyworm Spodoptera frugiperda	2019	1_2.9	Sandy	P_deficent	Neutral	Zea mays	Poaceae	Fibrous	Annual	56	10	36	>1	Mixed	Mixed	Mixed	0.338717	0.236118	0.0109401	0.122073	0.0100972	0.208468	0.0107325
330	795	Increased Silicon Acquisition in Bananas Colonized by Rhizophagus irregularis MUCL 41833 Reduces the Incidence of Pseudocercospora fijiensis	2019	1_2.9	Sandy			Musa acuminata	Other	Fibrous	Perennial	56	6	71.3	1	Rhizophagus irregularis	Glomeraceae	Rhizophilic guild	0.774194	0.238085	0.000749755	0.423814	0.0275546	0.3234	0.00139919
331	796	Infectivity and effectivity of commercial and native arbuscular mycorrhizal biofertilizers in seedlings of maize (Zea mays)	2018	1_2.9	Sandy		Alkaline	Zea mays	Poaceae	Fibrous	Annual	32	3	14.264	>1	Mixed	Mixed	Mixed	0.571447	-0.526512	0.00026049	-0.360862	0.000436507	-0.469279	0.00218502
332	797	Influence of a plant growth-promoting pseudomonad and vesicular-arbuscular mycorrhizal fungus on alfalfa and birdsfoot trefoil growth and nodulation	1991		No_sandy			Medicago sativa	Fabaceae	Taproot	Perennial	70	10	86	1	Rhizophagus intraradices	Glomeraceae	Rhizophilic guild	1.11243	0.0695531	0.002	-0.0852519	0.002	-0.00897673	0.002
333	798	Influence of AM Fungi, Glomus mosseae and Glomus intraradices on Chickpea Growth and Root-Rot Disease Caused by Fusarium solani f. sp. pisi under Greenhouse Conditions	2015		Sandy			Cicer arietinum	Fabaceae	Taproot	Annual	42	7	78.75	1	Funneliformis mosseae	Glomeraceae	Rhizophilic guild	0.444444	0.751591	0.00228244	0.559616	0.00227896	0.696347	0.00220348
333	799	Influence of AM Fungi, Glomus mosseae and Glomus intraradices on Chickpea Growth and Root-Rot Disease Caused by Fusarium solani f. sp. pisi under Greenhouse Conditions	2015		Sandy			Cicer arietinum	Fabaceae	Taproot	Annual	42	7	69.5	1	Rhizophagus intraradices	Glomeraceae	Rhizophilic guild	0.444444	0.393043	0.001384	0.0206193	0.00636952	0.292478	0.0022932
333	800	Influence of AM Fungi, Glomus mosseae and Glomus intraradices on Chickpea Growth and Root-Rot Disease Caused by Fusarium solani f. sp. pisi under Greenhouse Conditions	2015		Sandy			Cicer arietinum	Fabaceae	Taproot	Annual	42	7	56.25	>1	Mixed	Glomeraceae	Rhizophilic guild	0.444444	0.154151	0.00335637	0.0206193	0.00178809	0.11493	0.00257618
334	801	influence of arbuscular mycorrhiza on photosynthesis and water status of Populus cathayana Rehder males and females under salt stress	2015	>2.9	Sandy	No_P_deficient	Alkaline	Populus cathayana	Other	Taproot	Perennial	80	15	87.28	1	Rhizophagus irregularis	Glomeraceae	Rhizophilic guild	0.369905	0.0699326	0.00239564	-0.269261	0.0429218	-0.0109234	0.00672154
334	802	influence of arbuscular mycorrhiza on photosynthesis and water status of Populus cathayana Rehder males and females under salt stress	2015	>2.9	Sandy	No_P_deficient	Alkaline	Populus cathayana	Other	Taproot	Perennial	80	15	88.87	1	Rhizophagus irregularis	Glomeraceae	Rhizophilic guild	0.395507	0.113094	0.00635973	0.0196183	0.0192709	0.0874769	0.00915934
335	803	influence of arbuscular mycorrhiza on the growth and cadmium uptake of tobacco with inserted metallothionein gene	2005	>2.9	Sandy		Alkaline	Nicotiana tabacum	Solanaceae	Fibrous	Annual	84	5	95	1	Rhizophagus intraradices	Glomeraceae	Rhizophilic guild	0.101293	-0.0996298	0.000683013	-0.23923	0.0106484	-0.111686	0.00105429
335	804	influence of arbuscular mycorrhiza on the growth and cadmium uptake of tobacco with inserted metallothionein gene	2005	>2.9	Sandy		Alkaline	Nicotiana tabacum	Solanaceae	Fibrous	Annual	84	5	95	1	Rhizophagus intraradices	Glomeraceae	Rhizophilic guild	0.114094	-0.106107	0.0032347	-0.242946	0.00625148	-0.11929	0.00332792
335	805	influence of arbuscular mycorrhiza on the growth and cadmium uptake of tobacco with inserted metallothionein gene	2005	>2.9	Sandy		Alkaline	Nicotiana tabacum	Solanaceae	Fibrous	Annual	84	5	59	1	Rhizophagus intraradices	Glomeraceae	Rhizophilic guild	0.144737	0.254234	0.00249528	0.464306	0.0213257	0.283362	0.00398791
335	806	influence of arbuscular mycorrhiza on the growth and cadmium uptake of tobacco with inserted metallothionein gene	2005	>2.9	Sandy		Alkaline	Nicotiana tabacum	Solanaceae	Fibrous	Annual	84	5	59	1	Rhizophagus intraradices	Glomeraceae	Rhizophilic guild	0.173913	0.251314	0.00378072	0.405465	0.0102041	0.275706	0.00459012
336	807	Influence of arbuscular mycorrhizae on photosynthesis and water status of maize plants under salt stress	2008	1_2.9	No_sandy	No_P_deficient	Alkaline	Zea mays	Poaceae	Fibrous	Annual	70	5	99	1	Funneliformis mosseae	Glomeraceae	Rhizophilic guild	0.429967	0.694775	0.054027	0.585258	0.0324313	0.663087	0.0470476
337	808	Influence of Arbuscular Mycorrhizal (AM) Fungi and Salinity on Seedling Growth, Solute Accumulation, and Mycorrhizal Dependency of Jatropha curcas L.	2010	>2.9	No_sandy	No_P_deficient	Neutral	Jatropha curcas	Other	Taproot	Perennial	60	4	60.66	>1	Mixed	Mixed	Mixed	0.368421	0.126195	0.005	0.133531	0.005	0.128175	0.005
338	809	Influence of arbuscular mycorrhizal fungi and Pseudomonas fluorescens at different superphosphate levels on linseed (Linum usitatissimum L.) Growth response	2012	>2.9	Sandy	No_P_deficient	Alkaline	Linum usitatissimum	Other	Taproot	Annual	120	5	31.4	1	Funneliformis mosseae	Glomeraceae	Rhizophilic guild	0.0388889	0.635989	0.00138889	0.826679	0.00316582	0.643822	0.00140706
338	810	Influence of arbuscular mycorrhizal fungi and Pseudomonas fluorescens at different superphosphate levels on linseed (Linum usitatissimum L.) Growth response	2012	>2.9	Sandy	No_P_deficient	Alkaline	Linum usitatissimum	Other	Taproot	Annual	120	5	64.09	1	Acaulospora laevis	Acaulosporaceae	Ancestral guild	0.0388889	0.543615	0.00142167	0.944462	0.00250995	0.561905	0.00143969
339	811	Influence of arbuscular mycorrhizal fungi and salinity on growth, biomass, and mineral nutrition of Acacia auriculiformis	2003	1_2.9	No_sandy	No_P_deficient	Neutral	Acacia auriculiformis	Fabaceae	Taproot	Perennial	45	5	55.5	1	Rhizophagus fasciculatus	Glomeraceae	Rhizophilic guild	1.87963	0.178965	0.0556586	0.222805	0.0337377	0.207797	0.040016
339	812	Influence of arbuscular mycorrhizal fungi and salinity on growth, biomass, and mineral nutrition of Acacia auriculiformis	2003	1_2.9	No_sandy	No_P_deficient	Neutral	Acacia auriculiformis	Fabaceae	Taproot	Perennial	45	5	65	1	Glomus macrocarpum	Glomeraceae	Rhizophilic guild	1.87963	0.506393	0.050934	0.658374	0.0306956	0.608172	0.0363861
339	813	Influence of arbuscular mycorrhizal fungi and salinity on growth, biomass, and mineral nutrition of Acacia auriculiformis	2003	1_2.9	No_sandy	No_P_deficient	Neutral	Acacia auriculiformis	Fabaceae	Taproot	Perennial	45	5	74	>1	Mixed	Glomeraceae	Rhizophilic guild	1.87963	0.581626	0.063404	1.34021	0.0234687	1.13609	0.0333374
340	814	Influence of Arbuscular Mycorrhizal Fungi and Sodium Chloride on Fusarium Root Rot and Antioxidative Abilities in Asparagus Plants	2012		Sandy			Asparagus officinalis	Other	Fibrous	Perennial	102	5	74	1	Glomus sp.	Glomeraceae	Rhizophilic guild	1.4803	0.974296	0.0130329	0.369614	0.0250471	0.658476	0.0175079
340	815	Influence of Arbuscular Mycorrhizal Fungi and Sodium Chloride on Fusarium Root Rot and Antioxidative Abilities in Asparagus Plants	2012		Sandy			Asparagus officinalis	Other	Fibrous	Perennial	102	5	60	1	Gigaspora margarita	Gigasporaceae	Edaphophilic guild	1.4803	1.35163	0.0234558	0.41697	0.018255	0.901525	0.0212616
341	816	Influence of early stages of arbuscular mycorrhiza on uptake of zinc and phosphorus by red clover from a low-phosphorus soil amended with zinc and phosphorus	2003	1_2.9	Sandy	No_P_deficient	Acidic	Trifolium pratense	Fabaceae	Fibrous	Perennial	40	8	35	1	Funneliformis mosseae	Glomeraceae	Rhizophilic guild	0.374194	-0.438255	0.0025	-0.534082	0.0025	-0.463452	0.0025
342	817	Influence of growth stage on the association between some tropical legumes and two variant species of Glomus in an andosol	2012	1_2.9	No_sandy	No_P_deficient	Neutral	Arachis hypogaea	Fabaceae	Taproot	Annual	121	3	62	1	Claroideoglomus etunicatum	Claroideoglomeraceae	Rhizophilic guild	0.491018	2.38032	0.00666667	0.991443	0.00666667	2.09637	0.00666667
342	818	Influence of growth stage on the association between some tropical legumes and two variant species of Glomus in an andosol	2012	1_2.9	No_sandy	No_P_deficient	Neutral	Cajanus cajan	Fabaceae	Taproot	Perennial	145	3	34	1	Glomus sp.	Glomeraceae	Rhizophilic guild	0.504348	1.52037	0.00666667	0.775839	0.00666667	1.32675	0.00666667
342	819	Influence of growth stage on the association between some tropical legumes and two variant species of Glomus in an andosol	2012	1_2.9	No_sandy	No_P_deficient	Neutral	Cajanus cajan	Fabaceae	Taproot	Perennial	145	3	70	1	Claroideoglomus etunicatum	Claroideoglomeraceae	Rhizophilic guild	0.504348	3.37863	0.00666667	2.77474	0.00666667	3.21378	0.00666667
342	820	Influence of growth stage on the association between some tropical legumes and two variant species of Glomus in an andosol	2012	1_2.9	No_sandy	No_P_deficient	Neutral	Vigna unguiculata	Fabaceae	Taproot	Annual	80	3	52	1	Glomus sp.	Glomeraceae	Rhizophilic guild	0.72973	1.35193	0.00666667	0.287682	0.00666667	1.0285	0.00666667
342	821	Influence of growth stage on the association between some tropical legumes and two variant species of Glomus in an andosol	2012	1_2.9	No_sandy	No_P_deficient	Neutral	Vigna unguiculata	Fabaceae	Taproot	Annual	80	3	58	1	Claroideoglomus etunicatum	Claroideoglomeraceae	Rhizophilic guild	0.72973	3.45725	0.00666667	1.95119	0.00666667	3.05929	0.00666667
343	822	influence of Phosphorus and Endomycorrhiza (Glomus Intraradices) on gas exchange and plant growth of Chile Ancho Pepper (Capsicum Annuum L. cv. San Luis)	1999	1_2.9	Sandy			Capsicum annuum	Solanaceae	Fibrous	Annual	52	5	96	1	Rhizophagus intraradices	Glomeraceae	Rhizophilic guild	0.777778	1.77307	0.0137697	0.887303	0.00856225	1.47591	0.0106258
344	823	Influence of Rhizophagus irregularis inoculation and phosphorus application on growth and arsenic accumulation in maize (Z ea mays L.) cultivated on an arsenic-contaminated soil	2014	1_2.9	No_sandy	P_deficent	Alkaline	Zea mays	Poaceae	Fibrous	Annual	42	3	60	1	Rhizophagus irregularis	Glomeraceae	Rhizophilic guild	0.535714	-0.0935261	0.278238	-0.567984	0.376474	-0.23484	0.302494
345	824	Influence of soil impoverishment on the interaction between Glomus mosseae and saprobe fungi	1999	<1	Sandy		Neutral	Glycine max	Fabaceae	Taproot	Annual	45	5	9.6	1	Funneliformis mosseae	Glomeraceae	Rhizophilic guild	0.477354	0.0213379	0.004	0.27136	0.004	0.109149	0.004
345	825	Influence of soil impoverishment on the interaction between Glomus mosseae and saprobe fungi	1999	<1	Sandy		Neutral	Glycine max	Fabaceae	Taproot	Annual	45	5	22.1	1	Funneliformis mosseae	Glomeraceae	Rhizophilic guild	0.64531	0.0215624	0.004	0.0881196	0.004	0.0481974	0.004
346	826	Influence of the endomycorrhizal fungus Glomus mosseae on the development of peanut pod rot disease in Egypt	2000	>2.9	Sandy	No_P_deficient	Alkaline	Arachis hypogaea	Fabaceae	Taproot	Annual	150	10	43	1	Funneliformis mosseae	Glomeraceae	Rhizophilic guild	0.12069	0.338625	0.002	0.533775	0.002	0.361567	0.002
347	827	Influence of the Herbicides Chlorsulfuron and Glyphosate on Mycorrhizal Soybean lntercropped with the Weeds Brassica campestris or Sorghum halepensis	1999	<1	Sandy	No_P_deficient	Acidic	Glycine max	Fabaceae	Taproot	Annual	60	5	16	1	Funneliformis mosseae	Glomeraceae	Rhizophilic guild	0.52514	0.105919	0.004	-0.0096206	0.004	0.0676244	0.004
348	828	Influence of two legume species on hyphal production and activity of two arbuscular mycorrhizal fungi	1997	<1	No_sandy	No_P_deficient	Neutral	Astragalus sinicus	Fabaceae	Taproot	Annual	56	4	68	1	Rhizophagus intraradices	Glomeraceae	Rhizophilic guild	0.931373	0.630785	0.005	-0.115155	0.005	0.338404	0.005
348	829	Influence of two legume species on hyphal production and activity of two arbuscular mycorrhizal fungi	1997	<1	No_sandy	No_P_deficient	Neutral	Astragalus sinicus	Fabaceae	Taproot	Annual	56	4	62	1	Funneliformis mosseae	Glomeraceae	Rhizophilic guild	0.931373	0.549292	0.005	-0.111226	0.005	0.283868	0.005
348	830	Influence of two legume species on hyphal production and activity of two arbuscular mycorrhizal fungi	1997	<1	No_sandy	No_P_deficient	Neutral	Glycine max	Fabaceae	Taproot	Annual	56	4	68	1	Rhizophagus intraradices	Glomeraceae	Rhizophilic guild	1.6	3.22684	0.005	3.09388	0.005	3.14713	0.005
348	831	Influence of two legume species on hyphal production and activity of two arbuscular mycorrhizal fungi	1997	<1	No_sandy	No_P_deficient	Neutral	Glycine max	Fabaceae	Taproot	Annual	56	4	73	1	Funneliformis mosseae	Glomeraceae	Rhizophilic guild	1.6	3.26957	0.005	3.11629	0.005	3.17805	0.005
349	832	Influence of vesicular-arbuscular mycorrhizae on celery transplant growth and phosphorus-use efficiency	2002		Sandy			Apium graveolens	Other	Taproot	Annual	90	6	93.4	1	Rhizophagus intraradices	Glomeraceae	Rhizophilic guild	0.371859	0.517836	0.00333333	0.249812	0.00333333	0.451985	0.00333333
349	833	Influence of vesicular-arbuscular mycorrhizae on celery transplant growth and phosphorus-use efficiency	2002		Sandy			Apium graveolens	Other	Taproot	Annual	90	6	84.7	1	Rhizophagus intraradices	Glomeraceae	Rhizophilic guild	0.376623	0.293348	0.00333333	0.216223	0.00333333	0.272832	0.00333333
350	834	Initial microbial status modulates mycorrhizal inoculation effect on rhizosphere microbial communities	2019	<1	Sandy	No_P_deficient	Acidic	Festuca arundinacea	Poaceae	Fibrous	Perennial	140	3	50	>1	Mixed	Mixed	Mixed	0.615747	-0.32601	0.0398526	-0.411393	0.077223	-0.357695	0.0519807
350	835	Initial microbial status modulates mycorrhizal inoculation effect on rhizosphere microbial communities	2019	<1	Sandy	No_P_deficient	Acidic	Lolium perenne	Poaceae	Fibrous	Perennial	140	3	47	>1	Mixed	Mixed	Mixed	0.118657	0.168831	0.037803	0.182237	0.0455691	0.170261	0.0381019
350	836	Initial microbial status modulates mycorrhizal inoculation effect on rhizosphere microbial communities	2019	<1	Sandy	No_P_deficient	Acidic	Medicago sativa	Fabaceae	Taproot	Perennial	140	3	28	>1	Mixed	Mixed	Mixed	0.940729	0.200964	0.0581189	0.544151	0.619407	0.382005	0.284527
350	837	Initial microbial status modulates mycorrhizal inoculation effect on rhizosphere microbial communities	2019	<1	Sandy	No_P_deficient	Acidic	Trifolium pratense	Fabaceae	Fibrous	Perennial	140	3	25	>1	Mixed	Mixed	Mixed	0.263229	0.190749	0.139058	0.0329384	0.487492	0.159856	0.188014
351	838	Inoculation of Rhizoglomus irregulare or Trichoderma atroviride differentially modulates metabolite pro?ling of wheat root exudates	2019	>2.9	Sandy			Triticum aestivum	Poaceae	Fibrous	Annual	60	3	31.7	1	Rhizophagus irregularis	Glomeraceae	Rhizophilic guild	0.104651	0.165712	0.00666667	0.328504	0.00666667	0.182322	0.00666667
352	839	Inoculation of tomato seedlings with Trichoderma harzianum and arbuscular mycorrhizal fungi and their effect on growth and control of wilt in tomato seedlings	2011	1_2.9	No_sandy	P_deficent	Acidic	Solanum lycopersicum	Solanaceae	Fibrous	Annual	63	4	65.1	>1	Mixed	Mixed	Mixed	0.5	0.100805	0.005	0.35364	0.005	0.192372	0.005
353	840	Inoculation with arbuscular micorrizhal fungi and organic compost from cocoa shell positively influence the growth and mineral nutrition of soursop plants (Annona muricata l.)	2018	>2.9	No_sandy	P_deficent	Acidic	Annona muricata	Other	Taproot	Perennial	120	1	41	1	Acaulospora scrobiculata	Acaulosporaceae	Ancestral guild	0.985294	1.8718	0.02	1.03175	0.02	1.54045	0.02
353	841	Inoculation with arbuscular micorrizhal fungi and organic compost from cocoa shell positively influence the growth and mineral nutrition of soursop plants (Annona muricata l.)	2018	>2.9	No_sandy	P_deficent	Acidic	Annona muricata	Other	Taproot	Perennial	120	1	60	1	Acaulospora colombiana	Acaulosporaceae	Ancestral guild	0.985294	2.11732	0.02	1.29248	0.02	1.79052	0.02
353	842	Inoculation with arbuscular micorrizhal fungi and organic compost from cocoa shell positively influence the growth and mineral nutrition of soursop plants (Annona muricata l.)	2018	>2.9	No_sandy	P_deficent	Acidic	Annona muricata	Other	Taproot	Perennial	120	1	58	>1	Mixed	Mixed	Mixed	0.985294	1.92896	0.02	0.954363	0.02	1.55931	0.02
354	843	Inoculation with arbuscular mycorrhizal fungus Acaulospora mellea decreases Cu phytoextraction by maize from Cu-contaminated soil	2007	<1	Sandy	No_P_deficient	Neutral	Zea mays	Poaceae	Fibrous	Annual	49	4	73.8	1	Acaulospora mellea	Acaulosporaceae	Ancestral guild	0.994143	-1.47792	0.00330308	-1.23987	0.00507751	-1.35218	0.00415276
355	844	Integrated effect of arbuscular mycorrhizal fungi and hydrogen peroxide on the root system of trifoliate orange seedlings	2014	>2.9	Sandy			Poncirus trifoliata	Rutaceae	Taproot	Perennial	66	3	65.1	1	Diversispora versiformis	Diversisporaceae	Edaphophilic guild	0.39527	0.0748316	0.000740737	0.0363676	0.00354308	0.0640844	0.0013019
356	845	Interacted Effect of Arbuscular Mycorrhizal Fungi and Polyamines on Root System Architecture of Citrus Seedlings	2012		Sandy			Citrus tangerine	Rutaceae	Taproot	Perennial	98	3	6.15	1	Paraglomus occultum	Paraglomeraceae	Rhizophilic guild	1.20136	0.214804	0.04017	0.0316596	0.0550031	0.119031	0.0469839
357	846	Interaction between arbuscular mycorrhizal fungi and vermicompost on copper phytoremediation in a sandy soil	2015	>2.9	Sandy	P_deficent	Acidic	Canavalia ensiformis	Fabaceae	Taproot	Perennial	45	3	19.5	1	Rhizophagus clarus	Glomeraceae	Rhizophilic guild	0.120996	-0.173298	0.00632492	0.265293	0.0475938	-0.115576	0.00885264
358	847	Interaction between Aspergillus niger van Tiegh. and Glomus mosseae. (Nicol. & Gerd.) Gerd. & Trappe	1995	<1				Lactuca sativa	Asteraceae	Taproot	Annual	70	5	84.4	1	Funneliformis mosseae	Glomeraceae	Rhizophilic guild	0.815789	0.719123	0.004	0.457833	0.004	0.610081	0.004
358	848	Interaction between Aspergillus niger van Tiegh. and Glomus mosseae. (Nicol. & Gerd.) Gerd. & Trappe	1995	<1				Zea mays	Poaceae	Fibrous	Annual	70	5	40.4	1	Funneliformis mosseae	Glomeraceae	Rhizophilic guild	0.826087	0.461818	0.004	0.0344862	0.004	0.290654	0.004
359	849	Interactions between arbuscular mycorrhizae and heavy metals under sand culture experiment	2003	<1	Sandy			Zea mays	Poaceae	Fibrous	Annual	56	4	22	1	Acaulospora laevis	Acaulosporaceae	Ancestral guild	0.304152	-0.451059	0.14108	-0.235321	0.0312233	-0.396425	0.0916923
359	850	Interactions between arbuscular mycorrhizae and heavy metals under sand culture experiment	2003	<1	Sandy			Zea mays	Poaceae	Fibrous	Annual	56	4	38	1	Funneliformis caledonium	Glomeraceae	Rhizophilic guild	0.304152	-0.19708	0.102771	-0.232356	0.0949695	-0.205196	0.0999274
359	851	Interactions between arbuscular mycorrhizae and heavy metals under sand culture experiment	2003	<1	Sandy			Zea mays	Poaceae	Fibrous	Annual	56	4	16	1	Rhizophagus manihotis	Glomeraceae	Rhizophilic guild	0.304152	-0.144571	0.0455267	-0.0779976	0.0283278	-0.128644	0.0358198
360	852	Interactions between arbuscular mycorrhizal fungi and phosphate-solubilizing fungus ( Mortierella sp.) and their effects on Kostelelzkya virginica growth and enzyme activities of rhizosphere and bulk soils at different salinities	2011	<1	Sandy	P_deficent	Neutral	Kosteletzkya virginica	Other	Taproot	Perennial	90	3	56	1	Funneliformis mosseae	Glomeraceae	Rhizophilic guild	0.189923	0.191388	0.00849103	0.375375	0.0188323	0.22312	0.00983744
360	853	Interactions between arbuscular mycorrhizal fungi and phosphate-solubilizing fungus ( Mortierella sp.) and their effects on Kostelelzkya virginica growth and enzyme activities of rhizosphere and bulk soils at different salinities	2011	<1	Sandy	P_deficent	Neutral	Kosteletzkya virginica	Other	Taproot	Perennial	90	3	60	1	Glomus aggregatum	Glomeraceae	Rhizophilic guild	0.189923	0.320169	0.00526917	0.43912	0.0123496	0.340129	0.00605784
360	854	Interactions between arbuscular mycorrhizal fungi and phosphate-solubilizing fungus ( Mortierella sp.) and their effects on Kostelelzkya virginica growth and enzyme activities of rhizosphere and bulk soils at different salinities	2011	<1	Sandy	P_deficent	Neutral	Kosteletzkya virginica	Other	Taproot	Perennial	90	3	75	>1	Mixed	Glomeraceae	Rhizophilic guild	0.189923	0.0351471	0.00880254	0.132119	0.0148457	0.0512694	0.00940407
361	855	Interactions between arbuscular mycorrhizal fungi, rhizobacteria, soil phosphorus and plant cytokinin de?ciency change the root morphology, yield and quality of tobacco	2013	<1	Sandy			Nicotiana tabacum	Solanaceae	Fibrous	Annual	60	8	5	1	Rhizophagus intraradices	Glomeraceae	Rhizophilic guild	0.157355	-0.222018	0.00210859	-0.157529	0.0025	-0.213002	0.00215633
361	856	Interactions between arbuscular mycorrhizal fungi, rhizobacteria, soil phosphorus and plant cytokinin de?ciency change the root morphology, yield and quality of tobacco	2013	<1	Sandy			Nicotiana tabacum	Solanaceae	Fibrous	Annual	60	8	8.3	1	Rhizophagus intraradices	Glomeraceae	Rhizophilic guild	0.193008	0.138923	0.0960592	0.00325136	0.0025	0.118184	0.0725773
362	857	Interactions between Azotobacter, Pseudomonas and Arbuscular Mycorrhizal Fungi on Two Varieties of Sesamum indicum L.	2008	>2.9	Sandy	P_deficent	Neutral	Sesamum indicum	Other	Taproot	Annual	90	3	72.33	1	Acaulospora laevis	Acaulosporaceae	Ancestral guild	0.149532	0.0950817	0.0446264	0.43283	0.182424	0.146026	0.0580853
362	858	Interactions between Azotobacter, Pseudomonas and Arbuscular Mycorrhizal Fungi on Two Varieties of Sesamum indicum L.	2008	>2.9	Sandy	P_deficent	Neutral	Sesamum indicum	Other	Taproot	Annual	90	3	68.66	1	Rhizophagus fasciculatus	Glomeraceae	Rhizophilic guild	0.375947	0.20348	0.0587029	0.220467	0.0579093	0.20815	0.0584361
363	859	Interactions between drought stress and vesicular-arbuscular mycorrhiza on the growth of Faidherbia albida (syn. Acacia albida) and Acacia nilotica in sterile and non-sterile soils	1992	>2.9	Sandy	P_deficent	Neutral	Acacia nilotica	Fabaceae	Taproot	Perennial	84	3	52.7	1	Acaulospora dilatata	Acaulosporaceae	Ancestral guild	0.196429	1.50804	0.00666667	1.8506	0.00666667	1.57296	0.00666667
363	860	Interactions between drought stress and vesicular-arbuscular mycorrhiza on the growth of Faidherbia albida (syn. Acacia albida) and Acacia nilotica in sterile and non-sterile soils	1992	>2.9	Sandy	P_deficent	Neutral	Faidherbia albida	Fabaceae	Taproot	Perennial	70	3	27.7	1	Acaulospora dilatata	Acaulosporaceae	Ancestral guild	0.916667	2.0898	0.00666667	2.10191	0.00666667	2.09561	0.00666667
364	861	Interactions between phosphorus availability and an AM fungus (Glomus intraradices) and their effects on soil microbial respiration, biomass and enzyme activities in a calcareous soil	2006	>2.9	No_sandy	No_P_deficient	Alkaline	Trifolium alexandrinum	Fabaceae	Fibrous	Perennial	70	8	33.5	1	Rhizophagus intraradices	Glomeraceae	Rhizophilic guild	1.02473	2.44526	0.368208	1.9518	0.0259558	2.22571	0.141509
365	862	Interactions between plant species and mycorrhizal colonization on the bacterial community composition in the rhizosphere	2005	<1	Sandy	P_deficent	Alkaline	Brassica napus	Other	Taproot	Annual	28	6	7.8	1	Diversispora versiformis	Diversisporaceae	Edaphophilic guild	0.932203	0.00563382	0.0159219	-0.428455	0.0554103	-0.180569	0.0231802
365	863	Interactions between plant species and mycorrhizal colonization on the bacterial community composition in the rhizosphere	2005	<1	Sandy	P_deficent	Alkaline	Lycopersicon esculentum	Solanaceae	Taproot	Annual	28	6	6.5	1	Rhizophagus intraradices	Glomeraceae	Rhizophilic guild	0.420074	-0.169761	0.00794401	-0.273041	0.021001	-0.199217	0.00724258
365	864	Interactions between plant species and mycorrhizal colonization on the bacterial community composition in the rhizosphere	2005	<1	Sandy	P_deficent	Alkaline	Lycopersicon esculentum	Solanaceae	Taproot	Annual	28	6	15.8	1	Diversispora versiformis	Diversisporaceae	Edaphophilic guild	0.420074	-0.435656	0.0142591	-0.633043	0.0401208	-0.490099	0.0160548
365	865	Interactions between plant species and mycorrhizal colonization on the bacterial community composition in the rhizosphere	2005	<1	Sandy	P_deficent	Alkaline	Lycopersicon esculentum	Solanaceae	Taproot	Annual	28	6	53.8	1	Rhizophagus intraradices	Glomeraceae	Rhizophilic guild	0.448485	-0.185965	0.00555226	-0.382092	0.0112446	-0.253091	0.00137121
365	866	Interactions between plant species and mycorrhizal colonization on the bacterial community composition in the rhizosphere	2005	<1	Sandy	P_deficent	Alkaline	Lycopersicon esculentum	Solanaceae	Taproot	Annual	28	6	48	1	Diversispora versiformis	Diversisporaceae	Edaphophilic guild	0.448485	0.029853	0.00852927	-0.0413852	0.0174358	-0.00207254	0.00830592
365	867	Interactions between plant species and mycorrhizal colonization on the bacterial community composition in the rhizosphere	2005	<1	Sandy	P_deficent	Alkaline	Trifolium subterraneum	Fabaceae	Fibrous	Perennial	28	6	42.2	1	Rhizophagus intraradices	Glomeraceae	Rhizophilic guild	0.987952	0.215888	0.0564575	0.198451	0.0562856	0.207261	0.0520084
365	868	Interactions between plant species and mycorrhizal colonization on the bacterial community composition in the rhizosphere	2005	<1	Sandy	P_deficent	Alkaline	Trifolium subterraneum	Fabaceae	Fibrous	Perennial	28	6	33.6	1	Diversispora versiformis	Diversisporaceae	Edaphophilic guild	0.987952	0.536986	0.0668688	0.320669	0.0764572	0.435318	0.0607432
366	869	Interactions between the arbuscular mycorrhizal fungus Glomus mosseae and plant growth-promoting fungi and their signi?cance for enhancing plant growth and suppressing damping-off of cucumber (Cucumis sativus L.)	2009	<1	Sandy	No_P_deficient	Neutral	Cucumis sativus	Other	Taproot	Annual	42	3	47	1	Funneliformis mosseae	Glomeraceae	Rhizophilic guild	0.20142	0.171296	0.00666667	0.139722	0.00666667	0.166071	0.00666667
367	870	Interactions between Trichoderma pseudokoningii strains and the arbuscular mycorrhizal fungi Glomus mosseae and Gigaspora rosea	2004	<1	Sandy		Neutral	Glycine max	Fabaceae	Taproot	Annual	45	10	26	1	Funneliformis mosseae	Glomeraceae	Rhizophilic guild	0.508772	0.161641	0.002	-0.322773	0.002	0.0229895	0.002
367	871	Interactions between Trichoderma pseudokoningii strains and the arbuscular mycorrhizal fungi Glomus mosseae and Gigaspora rosea	2004	<1	Sandy		Neutral	Glycine max	Fabaceae	Taproot	Annual	45	10	45	1	Gigaspora rosea	Gigasporaceae	Edaphophilic guild	0.589641	0.510028	0.002	0.345122	0.002	0.451985	0.002
368	872	Interactions in the Symbiosis of Acacia salignawith Glomus mosseae and Rhizobium in a Fumigated and Unfumigated Soil	2001	>2.9	No_sandy	No_P_deficient	Neutral	Acacia saligna	Fabaceae	Taproot	Perennial	180	6	34.35	1	Funneliformis mosseae	Glomeraceae	Rhizophilic guild	0.214393	0.0620053	0.00333333	0.0719411	0.00333333	0.0637666	0.00333333
369	873	Interactions in the Tripartite Symbiosis of Pea (Pisum sativum L.), Glomus and Rhizobium under Non- limiting Phosphorus Supply	1992	<1	Sandy			Pisum sativum	Fabaceae	Taproot	Annual	35	5	42.6	1	Funneliformis mosseae	Glomeraceae	Rhizophilic guild	0.604743	-0.0953102	0.004	-0.155241	0.004	-0.117475	0.004
370	874	Interactions of arbuscular-mycorrhizal fungi and Bacillus strains and their effects on plant growth, microbial rhizosphere activity (thymidine and leucine incorporation) and fungal biomass (ergosterol and chitin)	2002	<1	Sandy	P_deficent	Alkaline	Medicago sativa	Fabaceae	Taproot	Perennial	84	5	50	1	Glomus deserticola	Glomeraceae	Rhizophilic guild	0.606956	0.610426	0.0290684	1.18634	0.230512	0.868275	0.0898082
371	875	Interactions of Trametes versicolor, Coriolopsis rigida and the arbuscular mycorrhizal fungus Glomus deserticola on the copper tolerance of Eucalyptus globulus	2009	<1	Sandy		Acidic	Eucalyptus globulus	Other	Taproot	Perennial	84	10	74	1	Glomus deserticola	Glomeraceae	Rhizophilic guild	0.362502	0.256388	0.00509167	0.394928	0.00716764	0.295161	0.00559847
372	876	Interactive Effect of AM Fungi with Trichoderma viride and Pseudomonas fluorescens on Growth and Yield of Broccoli	2013	1_2.9	Sandy	No_P_deficient	Neutral	Brassica oleracea	Other	Taproot	Annual	90	5	7.6	1	Acaulospora laevis	Acaulosporaceae	Ancestral guild	0.325893	0.378314	0.0248528	0.454473	0.00798386	0.397578	0.0195404
373	877	Interactive effects of arbuscular mycorrhizal symbiosis, intraspecifc competition and resource availability on Trifolium subterraneum cv. Mt. Barker	1999	<1	Sandy	P_deficent	Neutral	Trifolium subterraneum	Fabaceae	Fibrous	Perennial	56	4	57	1	Gigaspora margarita	Gigasporaceae	Edaphophilic guild	0.789206	2.02866	0.0216153	2.00018	0.035985	2.0162	0.0265294
373	878	Interactive effects of arbuscular mycorrhizal symbiosis, intraspecifc competition and resource availability on Trifolium subterraneum cv. Mt. Barker	1999	<1	Sandy	P_deficent	Neutral	Trifolium subterraneum	Fabaceae	Fibrous	Perennial	56	5	49	1	Gigaspora margarita	Gigasporaceae	Edaphophilic guild	0.68	2.16905	0.0392889	2.12389	0.0335304	2.1509	0.0354826
374	879	Interactive Effects of Defoliation and an AM Fungus on Plants and Soil Organisms in Experimental Legume-Grass Communities	2004	<1	No_sandy		Acidic	Trifolium repens	Fabaceae	Fibrous	Perennial	77	10	50	1	Claroideoglomus claroideum	Claroideoglomeraceae	Rhizophilic guild	0.095912	-0.118832	0.00338233	-0.0737752	0.0302311	-0.114807	0.0046953
375	880	Interactive effects of exogenous melatonin and Rhizophagus intraradices on saline-alkaline stress tolerance in Leymus chinensis	2020	1_2.9	Sandy	P_deficent	Alkaline	Leymus chinensis	Poaceae	Fibrous	Perennial	65	5	53	1	Rhizophagus intraradices	Glomeraceae	Rhizophilic guild	3.1875	0.223144	0.00453125	0.119959	0.00618232	0.13815	0.00455224
376	881	Interactive effects of temperature and arbuscular mycorrhizal fungi on growth, P uptake and root respiration of Capsicum annuum L.	2004	>2.9	Sandy		Neutral	Capsicum annuum	Solanaceae	Fibrous	Annual	56	5	29.9	1	Rhizophagus intraradices	Glomeraceae	Rhizophilic guild	0.517241	-0.231802	0.004	-0.405465	0.004	-0.287682	0.004
376	882	Interactive effects of temperature and arbuscular mycorrhizal fungi on growth, P uptake and root respiration of Capsicum annuum L.	2004	>2.9	Sandy		Neutral	Capsicum annuum	Solanaceae	Fibrous	Annual	56	5	13.4	1	Glomus sp.	Glomeraceae	Rhizophilic guild	0.517241	-0.231802	0.004	-0.223144	0.004	-0.228842	0.004
376	883	Interactive effects of temperature and arbuscular mycorrhizal fungi on growth, P uptake and root respiration of Capsicum annuum L.	2004	>2.9	Sandy		Neutral	Capsicum annuum	Solanaceae	Fibrous	Annual	56	5	45	>1	Mixed	Glomeraceae	Rhizophilic guild	0.517241	0.0339016	0.004	-0.143101	0.004	-0.0229895	0.004
377	884	Interactive impacts of earthworms (Eisenia fetida) and arbuscular mycorrhizal fungi (Funneliformis mosseae) on the bioavailability of calcium phosphates	2015	1_2.9	Sandy	P_deficent	Neutral	Zea mays	Poaceae	Fibrous	Annual	56	4	90.84	1	Funneliformis mosseae	Glomeraceae	Rhizophilic guild	1.09109	-1.57733	0.0297725	-1.51484	0.0798322	-1.54424	0.0472573
378	885	Interactive Influence of Soil and Plant Genotypes on Mycorrhizal Dependency in Finger Millet	2020	<1	No_sandy	P_deficent	Acidic	Eleusine coracana	Poaceae	Fibrous	Annual	45	10	64.5594	>1	Mixed	Mixed	Mixed	0.355751	0.882207	0.000499063	1.7583	0.0265098	1.19538	0.00671794
378	886	Interactive Influence of Soil and Plant Genotypes on Mycorrhizal Dependency in Finger Millet	2020	<1	No_sandy	P_deficent	Acidic	Eleusine coracana	Poaceae	Fibrous	Annual	45	10	83.8352	>1	Mixed	Mixed	Mixed	0.358657	0.190827	0.00014015	0.473213	0.000638606	0.273451	0.000242025
378	887	Interactive Influence of Soil and Plant Genotypes on Mycorrhizal Dependency in Finger Millet	2020	<1	No_sandy	P_deficent	Acidic	Eleusine coracana	Poaceae	Fibrous	Annual	45	10	36.7183	>1	Mixed	Mixed	Mixed	0.403228	0.0821177	0.000643106	0.300124	0.000188541	0.149775	0.000475454
378	888	Interactive Influence of Soil and Plant Genotypes on Mycorrhizal Dependency in Finger Millet	2020	<1	No_sandy	P_deficent	Acidic	Eleusine coracana	Poaceae	Fibrous	Annual	45	10	76.6893	>1	Mixed	Mixed	Mixed	0.411079	-0.120776	0.0260635	0.205645	0.000372998	-0.0142114	0.011431
378	889	Interactive Influence of Soil and Plant Genotypes on Mycorrhizal Dependency in Finger Millet	2020	<1	No_sandy	P_deficent	Acidic	Eleusine coracana	Poaceae	Fibrous	Annual	45	10	88.0637	>1	Mixed	Mixed	Mixed	0.424281	0.312424	0.000291519	0.79496	0.00244663	0.481952	0.000622394
378	890	Interactive Influence of Soil and Plant Genotypes on Mycorrhizal Dependency in Finger Millet	2020	<1	No_sandy	P_deficent	Acidic	Eleusine coracana	Poaceae	Fibrous	Annual	45	10	31.2543	>1	Mixed	Mixed	Mixed	0.46234	0.58053	0.00165458	0.0963522	9.97e-05	0.451169	0.00112373
378	891	Interactive Influence of Soil and Plant Genotypes on Mycorrhizal Dependency in Finger Millet	2020	<1	No_sandy	P_deficent	Acidic	Eleusine coracana	Poaceae	Fibrous	Annual	45	10	55.3205	>1	Mixed	Mixed	Mixed	0.474236	0.62974	0.00130953	0.234164	0.00126934	0.518701	0.00129964
378	892	Interactive Influence of Soil and Plant Genotypes on Mycorrhizal Dependency in Finger Millet	2020	<1	No_sandy	P_deficent	Acidic	Eleusine coracana	Poaceae	Fibrous	Annual	45	10	36.059	>1	Mixed	Mixed	Mixed	0.484054	0.219914	0.00413761	0.457575	0.000236169	0.3038	0.00178366
378	893	Interactive Influence of Soil and Plant Genotypes on Mycorrhizal Dependency in Finger Millet	2020	<1	No_sandy	P_deficent	Acidic	Eleusine coracana	Poaceae	Fibrous	Annual	45	10	46.7758	>1	Mixed	Mixed	Mixed	0.486319	0.174667	0.00562882	0.914498	0.000204093	0.481027	0.00175298
378	894	Interactive Influence of Soil and Plant Genotypes on Mycorrhizal Dependency in Finger Millet	2020	<1	No_sandy	P_deficent	Acidic	Eleusine coracana	Poaceae	Fibrous	Annual	45	10	71.5026	>1	Mixed	Mixed	Mixed	0.594843	-0.427508	0.107596	0.14505	1.58e-05	-0.174234	0.0260815
378	895	Interactive Influence of Soil and Plant Genotypes on Mycorrhizal Dependency in Finger Millet	2020	<1	No_sandy	No_P_deficient	Acidic	Eleusine coracana	Poaceae	Fibrous	Annual	45	10	51.3184	>1	Mixed	Mixed	Mixed	0.603997	0.387539	0.00159205	0.151793	0.000242251	0.305153	0.000951454
378	896	Interactive Influence of Soil and Plant Genotypes on Mycorrhizal Dependency in Finger Millet	2020	<1	No_sandy	No_P_deficient	Acidic	Eleusine coracana	Poaceae	Fibrous	Annual	45	10	18.509	>1	Mixed	Mixed	Mixed	0.65734	0.988342	0.0820299	0.699939	0.109687	0.883681	0.0861529
378	897	Interactive Influence of Soil and Plant Genotypes on Mycorrhizal Dependency in Finger Millet	2020	<1	No_sandy	No_P_deficient	Acidic	Eleusine coracana	Poaceae	Fibrous	Annual	45	10	58.7324	>1	Mixed	Mixed	Mixed	0.662444	0.818653	0.0547812	0.0879678	0.00025661	0.587252	0.0325113
378	898	Interactive Influence of Soil and Plant Genotypes on Mycorrhizal Dependency in Finger Millet	2020	<1	No_sandy	No_P_deficient	Acidic	Eleusine coracana	Poaceae	Fibrous	Annual	45	10	94.0241	>1	Mixed	Mixed	Mixed	0.713244	0.166979	0.00131671	0.0959164	0.000205235	0.138006	0.000743889
378	899	Interactive Influence of Soil and Plant Genotypes on Mycorrhizal Dependency in Finger Millet	2020	<1	No_sandy	No_P_deficient	Acidic	Eleusine coracana	Poaceae	Fibrous	Annual	45	10	59.9893	>1	Mixed	Mixed	Mixed	0.714219	0.0440973	0.00267495	0.0884843	0.000118342	0.0628309	0.00115091
378	900	Interactive Influence of Soil and Plant Genotypes on Mycorrhizal Dependency in Finger Millet	2020	<1	No_sandy	No_P_deficient	Acidic	Eleusine coracana	Poaceae	Fibrous	Annual	45	10	52.9251	>1	Mixed	Mixed	Mixed	0.730854	0.163835	6.33e-05	0.329592	2.52e-05	0.237203	3.89e-05
378	901	Interactive Influence of Soil and Plant Genotypes on Mycorrhizal Dependency in Finger Millet	2020	<1	No_sandy	No_P_deficient	Acidic	Eleusine coracana	Poaceae	Fibrous	Annual	45	10	37.3349	>1	Mixed	Mixed	Mixed	0.751745	0.0738302	1.6e-05	0.0702407	4.39e-05	0.0722914	2.62e-05
378	902	Interactive Influence of Soil and Plant Genotypes on Mycorrhizal Dependency in Finger Millet	2020	<1	No_sandy	No_P_deficient	Acidic	Eleusine coracana	Poaceae	Fibrous	Annual	45	10	72.0675	>1	Mixed	Mixed	Mixed	0.758873	0.368713	0.00582702	0.222545	0.0232244	0.308249	0.011912
378	903	Interactive Influence of Soil and Plant Genotypes on Mycorrhizal Dependency in Finger Millet	2020	<1	No_sandy	No_P_deficient	Acidic	Eleusine coracana	Poaceae	Fibrous	Annual	45	10	44.0641	>1	Mixed	Mixed	Mixed	0.840529	0.532047	0.0556206	0.144933	0.00010226	0.373535	0.0232625
378	904	Interactive Influence of Soil and Plant Genotypes on Mycorrhizal Dependency in Finger Millet	2020	<1	No_sandy	No_P_deficient	Acidic	Eleusine coracana	Poaceae	Fibrous	Annual	45	10	47.9552	>1	Mixed	Mixed	Mixed	0.893591	0.390232	0.0123574	0.121824	3.15e-05	0.272475	0.00460705
379	905	Intraspecific ploidy variation: a hidden, minor player in plant–soil–mycorrhizal fungi interactions	2014	<1	Sandy	No_P_deficient		Aster amellus	Asteraceae	Taproot	Perennial	84	6	90.8819	1	Rhizophagus irregularis	Glomeraceae	Rhizophilic guild	0.833377	2.67541	0.503683	2.73778	0.721868	2.70424	0.598265
379	906	Intraspecific ploidy variation: a hidden, minor player in plant–soil–mycorrhizal fungi interactions	2014	<1	Sandy	No_P_deficient		Aster amellus	Asteraceae	Taproot	Perennial	84	6	88.9418	1	Glomus sp.	Glomeraceae	Rhizophilic guild	0.833377	2.87472	0.48413	2.84732	0.717364	2.86236	0.583362
379	907	Intraspecific ploidy variation: a hidden, minor player in plant–soil–mycorrhizal fungi interactions	2014	<1	Sandy	No_P_deficient		Aster amellus	Asteraceae	Taproot	Perennial	84	6	91.9483	1	Rhizophagus irregularis	Glomeraceae	Rhizophilic guild	1.07555	3.66889	0.253602	4.06105	0.161571	3.89109	0.20294
379	908	Intraspecific ploidy variation: a hidden, minor player in plant–soil–mycorrhizal fungi interactions	2014	<1	Sandy	No_P_deficient		Aster amellus	Asteraceae	Taproot	Perennial	84	6	86.9475	1	Glomus sp.	Glomeraceae	Rhizophilic guild	1.07555	3.50829	0.257006	3.88607	0.148338	3.72168	0.196481
379	909	Intraspecific ploidy variation: a hidden, minor player in plant–soil–mycorrhizal fungi interactions	2014	<1	Sandy	No_P_deficient		Aster amellus	Asteraceae	Taproot	Perennial	84	6	84.0037	1	Rhizophagus irregularis	Glomeraceae	Rhizophilic guild	1.14306	2.11238	0.125032	1.99318	0.117124	2.05058	0.118453
379	910	Intraspecific ploidy variation: a hidden, minor player in plant–soil–mycorrhizal fungi interactions	2014	<1	Sandy	No_P_deficient		Aster amellus	Asteraceae	Taproot	Perennial	84	6	88.885	1	Glomus sp.	Glomeraceae	Rhizophilic guild	1.14306	2.28443	0.12452	2.29713	0.116454	2.29123	0.118324
379	911	Intraspecific ploidy variation: a hidden, minor player in plant–soil–mycorrhizal fungi interactions	2014	<1	Sandy	No_P_deficient		Aster amellus	Asteraceae	Taproot	Perennial	84	6	89.8564	1	Rhizophagus irregularis	Glomeraceae	Rhizophilic guild	1.69756	3.29004	0.140956	3.30741	0.102121	3.30101	0.1112
379	912	Intraspecific ploidy variation: a hidden, minor player in plant–soil–mycorrhizal fungi interactions	2014	<1	Sandy	No_P_deficient		Aster amellus	Asteraceae	Taproot	Perennial	84	6	86.0115	1	Glomus sp.	Glomeraceae	Rhizophilic guild	1.69756	3.16403	0.143787	3.03886	0.0930808	3.08711	0.106791
380	913	Investigation of the Effects of Vesicular Arbuscular Mycorrhiza on Mineral Nutrition and Growth of Carthamus tinctorius under Salt Stress Conditions	2008		Sandy		Neutral	Carthamus tinctorius	Asteraceae	Taproot	Annual	42	4	48.7	1	Claroideoglomus etunicatum	Claroideoglomeraceae	Rhizophilic guild	0.194631	0.30926	0.005	0.370374	0.005	0.319475	0.005
381	914	Involvement of autoregulation in the interaction between rhizobial nodulation and AM fungal colonization in soybean roots	2013	1_2.9	Sandy			Glycine max	Fabaceae	Taproot	Annual	63	5	82	1	Gigaspora rosea	Gigasporaceae	Edaphophilic guild	0.347826	0.822594	0.0122917	0.237328	0.00888734	0.701179	0.0112513
381	915	Involvement of autoregulation in the interaction between rhizobial nodulation and AM fungal colonization in soybean roots	2013	1_2.9	Sandy			Glycine max	Fabaceae	Taproot	Annual	63	5	87	1	Gigaspora rosea	Gigasporaceae	Edaphophilic guild	0.359773	0.612042	0.00859904	0.0974553	0.00524352	0.499512	0.00768234
382	916	Led spectral composition e?ects on mycorrhizal symbiosis formation with tomato plants	2017	>2.9	No_sandy	No_P_deficient	Acidic	Solanum lycopersicum	Solanaceae	Fibrous	Annual	120	9	66	1	Claroideoglomus claroideum	Claroideoglomeraceae	Rhizophilic guild	0.156463	0.162859	0.00222222	0.178692	0.00222222	0.165016	0.00222222
383	917	Leucanthemum Vulgare Lam. Germination, Growth and Mycorrhizal Symbiosis Under Crude Oil Contamination	2014	<1	Sandy		Alkaline	Leucanthemum vulgare	Asteraceae	Fibrous	Perennial	102	3	63	>1	Mixed	Mixed	Mixed	0.166216	-0.698567	0.00354536	0.218254	0.0274153	-0.504665	0.00714351
384	918	Limited impact of arbuscular mycorrhizal fungi on clones of Agrostis capillaris with different heavy metal tolerance	2015	<1	Sandy	No_P_deficient	Alkaline	Agrostis capillaris	Poaceae	Fibrous	Perennial	102	8	83	1	Rhizophagus irregularis	Glomeraceae	Rhizophilic guild	0.578574	0.00246539	0.00214993	-0.215432	0.00228984	-0.0720006	0.00219124
385	919	Microbial-Enhanced Phytoremediation of Lead Contaminated Calcareous Soil by Centaurea cyanus L.	2018	>2.9	No_sandy		Alkaline	Centaurea cyanus	Asteraceae	Fibrous	Annual	28	3	62	1	Glomus sp.	Glomeraceae	Rhizophilic guild	0.289617	0.600157	0.0056361	0.263815	0.0385467	0.533863	0.00922285
386	920	Mine land valorization through energy maize production enhanced by the application of plant growth-promoting rhizobacteria and arbuscular mycorrhizal fungi	2015	<1	Sandy		Acidic	Zea mays	Poaceae	Fibrous	Annual	60	4	10.86	1	Rhizophagus irregularis	Glomeraceae	Rhizophilic guild	0.254292	0.137966	0.00359279	-0.00243694	0.0268582	0.11105	0.00653598
387	921	Mineral nutrient mobilization by plants from rock: influence of rock type and arbuscular mycorrhiza	2015	<1	Sandy			Bouteloua dactyloides	Poaceae	Fibrous	Perennial	120	3		1	Rhizophagus irregularis	Glomeraceae	Rhizophilic guild	1.5693	-0.0701605	0.0904068	0.0768438	0.0917678	0.0219685	0.0779169
387	922	Mineral nutrient mobilization by plants from rock: influence of rock type and arbuscular mycorrhiza	2015	<1	Sandy			Bouteloua dactyloides	Poaceae	Fibrous	Perennial	120	3		1	Rhizophagus irregularis	Glomeraceae	Rhizophilic guild	1.74488	0.041085	0.109122	-0.0357429	0.176423	-0.00782604	0.131806
387	923	Mineral nutrient mobilization by plants from rock: influence of rock type and arbuscular mycorrhiza	2015	<1	Sandy			Bouteloua dactyloides	Poaceae	Fibrous	Perennial	120	3		1	Rhizophagus irregularis	Glomeraceae	Rhizophilic guild	1.91031	0.267964	0.0332726	0.00948152	0.0625077	0.103613	0.0269258
387	924	Mineral nutrient mobilization by plants from rock: influence of rock type and arbuscular mycorrhiza	2015	<1	Sandy			Bouteloua dactyloides	Poaceae	Fibrous	Perennial	120	3		1	Rhizophagus irregularis	Glomeraceae	Rhizophilic guild	3.00508	0.622718	0.14668	0.417397	0.480252	0.470363	0.335006
388	925	Moderating mycorrhizas arbuscular mycorrhizas modify rhizosphere chemistry and maintain plant phosphorus status within narrow boundaries	2014	<1	Sandy	No_P_deficient	Acidic	Bituminaria bituminosa	Fabaceae	Taproot	Perennial	70	4	31.1274	>1	Mixed	Mixed	Mixed	0.73497	0.253601	0.005	0.228848	0.005	0.24319	0.005
388	926	Moderating mycorrhizas arbuscular mycorrhizas modify rhizosphere chemistry and maintain plant phosphorus status within narrow boundaries	2014	<1	Sandy	No_P_deficient	Acidic	Cullen australasicum	Fabaceae	Taproot	Annual	70	4	39.6725	>1	Mixed	Mixed	Mixed	1.49056	0.415733	0.005	0.319295	0.005	0.35914	0.005
388	927	Moderating mycorrhizas arbuscular mycorrhizas modify rhizosphere chemistry and maintain plant phosphorus status within narrow boundaries	2014	<1	Sandy	No_P_deficient	Acidic	Kennedia prostrata	Fabaceae	Fibrous	Perennial	70	4	27.2566	>1	Mixed	Mixed	Mixed	0.656336	-0.169902	0.005	-0.40695	0.005	-0.257236	0.005
388	928	Moderating mycorrhizas arbuscular mycorrhizas modify rhizosphere chemistry and maintain plant phosphorus status within narrow boundaries	2014	<1	Sandy	No_P_deficient	Acidic	Medicago sativa	Fabaceae	Taproot	Perennial	70	4	22.3892	>1	Mixed	Mixed	Mixed	0.507565	-0.295188	0.005	-0.452206	0.005	-0.345348	0.005
388	929	Moderating mycorrhizas arbuscular mycorrhizas modify rhizosphere chemistry and maintain plant phosphorus status within narrow boundaries	2014	<1	Sandy	No_P_deficient	Acidic	Trifolium subterraneum	Fabaceae	Fibrous	Perennial	70	4	18.193	>1	Mixed	Mixed	Mixed	1.7852	0.170183	0.005	0.190536	0.005	0.183276	0.005
389	930	Multitrophic interactions between maize mycorrhizas, the root feeding insect Phyllophaga vetula and the entomopathogenic fungus Beauveria bassiana	2017	<1	Sandy	P_deficent	Neutral	Zea mays	Poaceae	Fibrous	Annual	63	5	59	>1	Mixed	Mixed	Mixed	0.915939	0.569398	0.0108656	-0.0755948	0.0272682	0.311612	0.0161095
390	931	Mycorrhiza and PGPB modulate maize biomass, nutrient uptake and metabolic pathways in maize grown in mining-impacted soil	2015	<1	Sandy	No_P_deficient	Neutral	Zea mays	Poaceae	Fibrous	Annual	62	3		>1	Mixed	Mixed	Mixed	0.602995	0.949616	0.0343303	0.775124	0.0771598	0.887495	0.0476692
391	932	Mycorrhiza and Repeated Drought Exposure Affect Drought Resistance and Extraradical Hyphae Development of Pepper Plants Independent of Plant Size and Nutrient Content	1992	1_2.9	Sandy	No_P_deficient		Capsicum annuum	Solanaceae	Fibrous	Annual	49	15	9.6	1	Glomus deserticola	Glomeraceae	Rhizophilic guild	0.704545	0.0224729	0.00133333	-0.175891	0.00133333	-0.0548082	0.00133333
392	933	Mycorrhiza and root hairs in barley enhance acquisition of phosphorus and uranium from phosphate rock but mycorrhiza decreases root to shoot uranium transfer	2004		Sandy	P_deficent	Neutral	Hordeum vulgare	Poaceae	Fibrous	Annual	28	3	88.2	1	Rhizophagus intraradices	Glomeraceae	Rhizophilic guild	0.441088	0.0295951	0.0151033	0.674309	0.0255006	0.274216	0.0176826
392	934	Mycorrhiza and root hairs in barley enhance acquisition of phosphorus and uranium from phosphate rock but mycorrhiza decreases root to shoot uranium transfer	2004		Sandy	P_deficent	Neutral	Hordeum vulgare	Poaceae	Fibrous	Annual	28	3	24.3	1	Rhizophagus intraradices	Glomeraceae	Rhizophilic guild	0.960148	-0.196645	0.000883165	-4.48e-05	0.00355273	-0.0955155	0.00189334
393	935	Mycorrhiza response and phosphorus acquisition efficiency of sorghum cultivars differing in strigolactone composition	2019	1_2.9	Sandy	No_P_deficient	Neutral	Sorghum bicolor	Poaceae	Fibrous	Annual	42	5	28.9	1	Rhizophagus irregularis	Glomeraceae	Rhizophilic guild	0.409091	-0.0953102	0.004	-0.117783	0.004	-0.101783	0.004
394	936	Mycorrhiza-induced protection against pathogens is both genotype-specific and graft-transmissible	2015	<1	Sandy			Solanum lycopersicum	Solanaceae	Fibrous	Annual	42	5	20	1	Rhizophagus irregularis	Glomeraceae	Rhizophilic guild	0.591837	0.00610378	0.0204834	0.107771	0.0145573	0.0451204	0.0179669
394	937	Mycorrhiza-induced protection against pathogens is both genotype-specific and graft-transmissible	2015	<1	Sandy			Solanum lycopersicum	Solanaceae	Fibrous	Annual	42	5	48	1	Rhizophagus irregularis	Glomeraceae	Rhizophilic guild	0.693452	0.040822	0.0257154	0.246055	0.0143476	0.13001	0.0204942
394	938	Mycorrhiza-induced protection against pathogens is both genotype-specific and graft-transmissible	2015	<1	Sandy			Solanum lycopersicum	Solanaceae	Fibrous	Annual	42	5	23	1	Rhizophagus irregularis	Glomeraceae	Rhizophilic guild	0.693452	0.0436751	0.042143	0.246055	0.0143476	0.131552	0.0286691
395	939	Mycorrhizal alfalfa and surfactant affect the uptake and dissipation of phenanthrene in soil	2019	<1	Sandy	No_P_deficient	Alkaline	Medicago sativa	Fabaceae	Taproot	Perennial	60	3	30	1	Claroideoglomus etunicatum	Claroideoglomeraceae	Rhizophilic guild	1.44681	1.84695	0.0137293	1.79665	0.0485948	1.81751	0.0313505
396	940	Mycorrhizal alleviation of acid soil stress in the sweet potato (Ipomoea batatas)	2005	<1	Sandy		Acidic	Ipomoea batatas	Other	Taproot	Perennial	30	4	30	1	Gigaspora margarita	Gigasporaceae	Edaphophilic guild	0.288495	0.0138419	0.005	0.534274	0.005	0.156096	0.005
397	941	Mycorrhizal and non-mycorrhizal Lactuca sativa plants exhibit contrasting responses to exogenous ABA during drought stress and recovery	2008	<1	Sandy	P_deficent	Alkaline	Lactuca sativa	Asteraceae	Taproot	Annual	60	5	45	1	Rhizophagus intraradices	Glomeraceae	Rhizophilic guild	0.586298	0.00316651	0.00429944	0.175164	0.0206798	0.0702313	0.00915863
398	942	Mycorrhizal association of Agrostis capillaris and Glomus intraradices under heavy metal stress: Combination of plant clones and fungal isolates from contaminated and uncontaminated substrates	2008	<1	Sandy	No_P_deficient	Neutral	Agrostis capillaris	Poaceae	Fibrous	Perennial	150	8	54.5	1	Rhizophagus intraradices	Glomeraceae	Rhizophilic guild	0.0769231	-0.0800427	0.0514464	0	0.5	-0.074108	0.06887
398	943	Mycorrhizal association of Agrostis capillaris and Glomus intraradices under heavy metal stress: Combination of plant clones and fungal isolates from contaminated and uncontaminated substrates	2008	<1	Sandy	No_P_deficient	Neutral	Agrostis capillaris	Poaceae	Fibrous	Perennial	150	8	69	1	Rhizophagus intraradices	Glomeraceae	Rhizophilic guild	0.0769231	-0.262364	0.0636686	0	0.5	-0.241162	0.0835406
398	944	Mycorrhizal association of Agrostis capillaris and Glomus intraradices under heavy metal stress: Combination of plant clones and fungal isolates from contaminated and uncontaminated substrates	2008	<1	Sandy	No_P_deficient	Neutral	Agrostis capillaris	Poaceae	Fibrous	Perennial	150	8	28	1	Rhizophagus intraradices	Glomeraceae	Rhizophilic guild	0.811765	0.280302	0.015989	0.24323	0.0348945	0.263862	0.0228426
398	945	Mycorrhizal association of Agrostis capillaris and Glomus intraradices under heavy metal stress: Combination of plant clones and fungal isolates from contaminated and uncontaminated substrates	2008	<1	Sandy	No_P_deficient	Neutral	Agrostis capillaris	Poaceae	Fibrous	Perennial	150	8	58	1	Rhizophagus intraradices	Glomeraceae	Rhizophilic guild	0.811765	-0.125163	0.0232581	0.14792	0.0474723	0.00647251	0.0326935
398	946	Mycorrhizal association of Agrostis capillaris and Glomus intraradices under heavy metal stress: Combination of plant clones and fungal isolates from contaminated and uncontaminated substrates	2008	<1	Sandy	No_P_deficient	Neutral	Agrostis capillaris	Poaceae	Fibrous	Perennial	150	8	23	1	Rhizophagus intraradices	Glomeraceae	Rhizophilic guild	0.903955	0.027857	0.00648119	0.0307717	0.0109341	0.0292418	0.00806992
398	947	Mycorrhizal association of Agrostis capillaris and Glomus intraradices under heavy metal stress: Combination of plant clones and fungal isolates from contaminated and uncontaminated substrates	2008	<1	Sandy	No_P_deficient	Neutral	Agrostis capillaris	Poaceae	Fibrous	Perennial	150	8	44	1	Rhizophagus intraradices	Glomeraceae	Rhizophilic guild	0.903955	0.101965	0.00750286	0.10661	0.00586278	0.104173	0.00668037
398	948	Mycorrhizal association of Agrostis capillaris and Glomus intraradices under heavy metal stress: Combination of plant clones and fungal isolates from contaminated and uncontaminated substrates	2008	<1	Sandy	No_P_deficient	Neutral	Agrostis capillaris	Poaceae	Fibrous	Perennial	150	8	34	1	Rhizophagus intraradices	Glomeraceae	Rhizophilic guild	0.953642	-0.272348	0.0177455	-0.149532	0.0283721	-0.210512	0.0227084
398	949	Mycorrhizal association of Agrostis capillaris and Glomus intraradices under heavy metal stress: Combination of plant clones and fungal isolates from contaminated and uncontaminated substrates	2008	<1	Sandy	No_P_deficient	Neutral	Agrostis capillaris	Poaceae	Fibrous	Perennial	150	8	51	1	Rhizophagus intraradices	Glomeraceae	Rhizophilic guild	0.953642	-0.16525	0.01354	-0.269333	0.0295919	-0.214705	0.0203113
398	950	Mycorrhizal association of Agrostis capillaris and Glomus intraradices under heavy metal stress: Combination of plant clones and fungal isolates from contaminated and uncontaminated substrates	2008	<1	Sandy	No_P_deficient	Neutral	Agrostis capillaris	Poaceae	Fibrous	Perennial	150	8	12	1	Rhizophagus intraradices	Glomeraceae	Rhizophilic guild	0.968153	-0.150971	0.0392025	-0.351052	0.0524376	-0.244404	0.0448819
398	951	Mycorrhizal association of Agrostis capillaris and Glomus intraradices under heavy metal stress: Combination of plant clones and fungal isolates from contaminated and uncontaminated substrates	2008	<1	Sandy	No_P_deficient	Neutral	Agrostis capillaris	Poaceae	Fibrous	Perennial	150	8	44	1	Rhizophagus intraradices	Glomeraceae	Rhizophilic guild	0.968153	0.0375044	0.0094631	-0.0471468	0.0100852	-0.00324149	0.00975693
398	952	Mycorrhizal association of Agrostis capillaris and Glomus intraradices under heavy metal stress: Combination of plant clones and fungal isolates from contaminated and uncontaminated substrates	2008	<1	Sandy	No_P_deficient	Neutral	Agrostis capillaris	Poaceae	Fibrous	Perennial	150	8	75	1	Rhizophagus intraradices	Glomeraceae	Rhizophilic guild	1.08163	-0.166127	0.0249282	-0.26899	0.0205236	-0.218254	0.0226433
398	953	Mycorrhizal association of Agrostis capillaris and Glomus intraradices under heavy metal stress: Combination of plant clones and fungal isolates from contaminated and uncontaminated substrates	2008	<1	Sandy	No_P_deficient	Neutral	Agrostis capillaris	Poaceae	Fibrous	Perennial	150	8	87	1	Rhizophagus intraradices	Glomeraceae	Rhizophilic guild	1.08163	0.282567	0.0133117	0.115684	0.0142292	0.199333	0.0137581
399	954	Mycorrhizal colonisation improves fruit yield and water use ef?ciency in watermelon (Citrullus lanatus Thunb.) grown under well-watered and water-stressed conditions	2003	<1	Sandy		Neutral	Citrullus lanatus	Other	Fibrous	Annual	120	3	87	1	Rhizophagus clarus	Glomeraceae	Rhizophilic guild	0.0990415	0.0746213	0.00666667	0.0996994	0.00666667	0.0769072	0.00666667
400	955	Mycorrhizal dependency of micropropagated argan tree (Argania spinosa): I. Growth and biomass production	1994	<1	No_sandy	No_P_deficient		Argania spinosa	Other	Taproot	Perennial	179	3		1	Rhizophagus intraradices	Glomeraceae	Rhizophilic guild	0.724566	1.68355	0.00832327	1.23711	0.0056862	1.51951	0.00724121
400	956	Mycorrhizal dependency of micropropagated argan tree (Argania spinosa): I. Growth and biomass production	1994	<1	No_sandy	No_P_deficient		Argania spinosa	Other	Taproot	Perennial	165	3		1	Rhizophagus intraradices	Glomeraceae	Rhizophilic guild	1.13456	1.79176	0.0469076	1.09585	0.0310935	1.48184	0.0377956
401	957	Mycorrhizal Dependency of Some Endemic and Endangered Hawaiian Plant Species	2002	<1	Sandy		Neutral	Bidens sandvicenst	Asteraceae	Taproot	Annual	75	8		1	Glomus aggregatum	Glomeraceae	Rhizophilic guild	0.735168	0.0438888	0.00913795	-0.10364	0.0329428	-0.0159822	0.0159812
401	958	Mycorrhizal Dependency of Some Endemic and Endangered Hawaiian Plant Species	2002	<1	Sandy		Neutral	Colubrina oppositifolia	Other	Taproot	Perennial	75	8		1	Glomus aggregatum	Glomeraceae	Rhizophilic guild	0.753418	0.448597	0.0353075	0.666629	0.0753513	0.548156	0.0522715
401	959	Mycorrhizal Dependency of Some Endemic and Endangered Hawaiian Plant Species	2002	<1	No_sandy		Neutral	Sesbania toentosa	Fabaceae	Taproot	Perennial	75	8		1	Glomus aggregatum	Glomeraceae	Rhizophilic guild	0.761249	0.171037	0.00219378	-0.186006	0.0125883	0.0320303	0.00529483
402	960	MYCORRHIZAL DEPENDENCY OF SOUR ORANGE IN RELATION TO PHOSPHORUS AND ZINC NUTRITION	2006	>2.9	No_sandy	P_deficent	Alkaline	Citrus aurantium	Rutaceae	Taproot	Perennial	330	3	78	1	Rhizophagus clarus	Glomeraceae	Rhizophilic guild	1.34146	3.42965	0.021888	2.58228	0.029839	3.03305	0.0262805
403	961	Mycorrhizal Effectiveness on Wheat Nutrient Acquisition in an Acidic Soil from Southern Chile as Affected by Nitrogen Sources	2008	<1	No_sandy	P_deficent	Acidic	Triticum aestivum	Poaceae	Fibrous	Annual	150	4	47	1	Claroideoglomus etunicatum	Claroideoglomeraceae	Rhizophilic guild	0.130341	-0.0477065	0.0369654	0.108048	0.118414	-0.0284585	0.04212
403	962	Mycorrhizal Effectiveness on Wheat Nutrient Acquisition in an Acidic Soil from Southern Chile as Affected by Nitrogen Sources	2008	<1	No_sandy	P_deficent	Acidic	Triticum aestivum	Poaceae	Fibrous	Annual	150	4	28	1	Claroideoglomus etunicatum	Claroideoglomeraceae	Rhizophilic guild	0.151715	-0.0162701	0.0421598	0.087654	0.113451	-0.00194664	0.0467974
404	963	Mycorrhizal function on soil aggregate stability in root zone and root-free hyphae zone of trifoliate orange	2015	>2.9	Sandy	P_deficent	Acidic	Poncirus trifoliata	Rutaceae	Taproot	Perennial	140	4	45.6	1	Funneliformis mosseae	Glomeraceae	Rhizophilic guild	0.789916	0.614504	0.0269293	0.506561	0.0101943	0.568297	0.0174535
404	964	Mycorrhizal function on soil aggregate stability in root zone and root-free hyphae zone of trifoliate orange	2015	>2.9	Sandy	P_deficent	Acidic	Poncirus trifoliata	Rutaceae	Taproot	Perennial	140	4	30	1	Paraglomus occultum	Paraglomeraceae	Rhizophilic guild	0.789916	0.457318	0.0238983	0.292987	0.0107417	0.388101	0.0149102
405	965	Mycorrhizal fungi and growth and development of micropropagated Scutellaria integrifolia plants	2007	>2.9	Sandy			Scutellaria integrifolia	Other	Taproot	Perennial	98	5	19.6	1	Rhizophagus intraradices	Glomeraceae	Rhizophilic guild	1.19087	0.142824	0.004	0.00347826	0.004	0.0694978	0.004
406	966	Mycorrhizal fungi enhancement of growth and gas exchange of micropropagated guava plantlets ( Psidium guajava L. ) during ex vitro acclimatization and plant establishment	2000	<1	Sandy	No_P_deficient	Acidic	Psidium guajava	Other	Taproot	Perennial	126	23	94	>1	Mixed	Mixed	Mixed	0.629921	0.685242	0.000869565	0.680568	0.000869565	0.683438	0.000869565
407	967	Mycorrhizal fungi in relation to growth and mineral nutrition of apple seedings	1993	1_2.9	No_sandy	No_P_deficient	Neutral	Malus micromalus	Other	Taproot	Perennial	100	5	90	1	Glomus epigaeum	Glomeraceae	Rhizophilic guild	1	0.223144	0.004	0.154151	0.004	0.189242	0.004
407	968	Mycorrhizal fungi in relation to growth and mineral nutrition of apple seedings	1993	1_2.9	No_sandy	No_P_deficient	Neutral	Malus micromalus	Other	Taproot	Perennial	100	5	24	1	Glomus macrocarpum	Glomeraceae	Rhizophilic guild	1	-0.0870114	0.004	-0.287682	0.004	-0.182322	0.004
408	969	Mycorrhizal Fungi Increase Salt Tolerance of Strophostyles helvola in Coastal Foredunes	1999		Sandy			Strophostyles helvol	Fabaceae	Taproot	Annual	56	5	69.6	>1	Mixed	Mixed	Mixed	1.23106	0.808528	0.0332603	0.116576	0.018598	0.48617	0.0263819
409	970	Mycorrhizal inoculant alleviates salt stress in Sesbania aegyptiaca and Sesbania grandiflora under field conditions: evidence for reduced sodium and improved magnesium uptake	2004	<1	No_sandy	P_deficent	Alkaline	Sesbania aegyptiaca	Fabaceae	Taproot	Perennial	30	5	40	1	Glomus macrocarpum	Glomeraceae	Rhizophilic guild	0.4391	1.4707	0.128505	0.954877	0.211533	1.33949	0.147681
409	971	Mycorrhizal inoculant alleviates salt stress in Sesbania aegyptiaca and Sesbania grandiflora under field conditions: evidence for reduced sodium and improved magnesium uptake	2004	<1	No_sandy	P_deficent	Alkaline	Sesbania grandiflora	Fabaceae	Taproot	Perennial	30	5	54	1	Glomus macrocarpum	Glomeraceae	Rhizophilic guild	0.144951	0.388326	0.108517	1.48939	0.138267	0.61477	0.097211
410	972	Mycorrhizal Inoculation Enhances Growth and Development of Micropropagated Plants of Avocado	1992	<1	No_sandy			Persea americana	Other	Taproot	Perennial	140	54	46.4	1	Rhizophagus fasciculatus	Glomeraceae	Rhizophilic guild	0.5	1.60944	0.00037037	1.09861	0.00037037	1.46634	0.00037037
411	973	Mycorrhizal inoculation enhances growth and nutrition of cotton plant	2019	1_2.9	No_sandy	No_P_deficient	Alkaline	Gossypium hirsutum	Other	Taproot	Annual	56	3	10	1	Funneliformis mosseae	Glomeraceae	Rhizophilic guild	0.662021	0.0274931	0.163027	-0.105361	0.102493	-0.0233309	0.138811
411	974	Mycorrhizal inoculation enhances growth and nutrition of cotton plant	2019	1_2.9	No_sandy	No_P_deficient	Alkaline	Gossypium hirsutum	Other	Taproot	Annual	56	3	38	1	Claroideoglomus etunicatum	Claroideoglomeraceae	Rhizophilic guild	0.662021	1.0176	0.0856793	0.901444	0.066343	0.972937	0.077905
412	975	Mycorrhizal Limonium Sinuatum (l.) Mill. Enhances Accumulation of Lead and Cadmium	2015	>2.9	Sandy	No_P_deficient	Alkaline	Limonium sinuatum	Other	Fibrous	Perennial	119	3	60	>1	Mixed	Mixed	Mixed	0.128346	0.00342583	0.00058574	0.341045	0.0198119	0.0480948	0.00112124
413	976	Mycorrhizal responses in wheat: shading decreases growth but does not lower the contribution of the fungal phosphate uptake pathway	2014	1_2.9	No_sandy	No_P_deficient	Alkaline	Triticum aestivum	Poaceae	Fibrous	Annual	42	5	40	1	Rhizophagus irregularis	Glomeraceae	Rhizophilic guild	1.79027	0.0793909	0.0333909	-0.161837	0.0199727	-0.0685542	0.0248328
413	977	Mycorrhizal responses in wheat: shading decreases growth but does not lower the contribution of the fungal phosphate uptake pathway	2014	1_2.9	No_sandy	No_P_deficient	Alkaline	Triticum aestivum	Poaceae	Fibrous	Annual	42	5	47	1	Gigaspora margarita	Gigasporaceae	Edaphophilic guild	1.79027	0.211974	0.0574	-0.242145	0.0178664	-0.054839	0.0319358
414	978	Mycorrhizal responses of barley cultivars differing in P efficiency	1993	1_2.9	No_sandy	P_deficent	Alkaline	Hordeum vulgare	Poaceae	Fibrous	Annual	42	3	20.17	1	Claroideoglomus etunicatum	Claroideoglomeraceae	Rhizophilic guild	0.598711	0.0534247	0.0299927	-0.128478	0.00919226	-0.0108849	0.0211802
414	979	Mycorrhizal responses of barley cultivars differing in P efficiency	1993	1_2.9	No_sandy	P_deficent	Alkaline	Hordeum vulgare	Poaceae	Fibrous	Annual	42	3	28.9474	1	Claroideoglomus etunicatum	Claroideoglomeraceae	Rhizophilic guild	0.664981	0.670465	0.020056	0.725235	0.030256	0.692701	0.0223622
414	980	Mycorrhizal responses of barley cultivars differing in P efficiency	1993	1_2.9	No_sandy	P_deficent	Alkaline	Hordeum vulgare	Poaceae	Fibrous	Annual	42	3	15.0453	1	Claroideoglomus etunicatum	Claroideoglomeraceae	Rhizophilic guild	0.703605	0.0234228	0.0138699	-0.176351	0.0133119	-0.0543113	0.0136531
414	981	Mycorrhizal responses of barley cultivars differing in P efficiency	1993	1_2.9	No_sandy	P_deficent	Alkaline	Hordeum vulgare	Poaceae	Fibrous	Annual	42	3	16.9575	1	Claroideoglomus etunicatum	Claroideoglomeraceae	Rhizophilic guild	0.754432	0.209409	0.0277511	-0.135438	0.00657383	0.0753937	0.0170355
414	982	Mycorrhizal responses of barley cultivars differing in P efficiency	1993	1_2.9	No_sandy	P_deficent	Alkaline	Hordeum vulgare	Poaceae	Fibrous	Annual	42	3	15.9231	1	Claroideoglomus etunicatum	Claroideoglomeraceae	Rhizophilic guild	0.757135	0.164855	0.0242378	-0.156569	0.029694	0.0387864	0.0260034
414	983	Mycorrhizal responses of barley cultivars differing in P efficiency	1993	1_2.9	No_sandy	P_deficent	Alkaline	Hordeum vulgare	Poaceae	Fibrous	Annual	42	3	14.845	1	Claroideoglomus etunicatum	Claroideoglomeraceae	Rhizophilic guild	0.808141	0.17536	0.0288695	-0.155149	0.0169052	0.0409257	0.0235921
414	984	Mycorrhizal responses of barley cultivars differing in P efficiency	1993	1_2.9	No_sandy	P_deficent	Alkaline	Hordeum vulgare	Poaceae	Fibrous	Annual	42	3	17.0347	1	Claroideoglomus etunicatum	Claroideoglomeraceae	Rhizophilic guild	0.907533	0.25537	0.0158588	-0.117783	0.0109766	0.0950002	0.0132511
414	985	Mycorrhizal responses of barley cultivars differing in P efficiency	1993	1_2.9	No_sandy	P_deficent	Alkaline	Hordeum vulgare	Poaceae	Fibrous	Annual	42	3	8.69797	1	Claroideoglomus etunicatum	Claroideoglomeraceae	Rhizophilic guild	1.1601	0.172128	0.0169184	0.0928502	0.00633347	0.130334	0.0106227
415	986	Mycorrhizal sink strength influences whole plant carbon balance of Trifolium repens L	1998	1_2.9	No_sandy			Trifolium repens	Fabaceae	Fibrous	Perennial	53	4	83	>1	Mixed	Mixed	Mixed	0.444403	0.386439	0.0166991	0.318685	0.0475338	0.366077	0.0130426
416	987	Mycorrhizal status influences the rate but not the temperature sensitivity of soil respiration	2005	>2.9	No_sandy			Helianthus annuus	Asteraceae	Taproot	Annual	91	8	82.5	1	Rhizophagus intraradices	Glomeraceae	Rhizophilic guild	0.147	0.27029	0.0706558	0.579818	0.0214796	0.313325	0.0620905
416	988	Mycorrhizal status influences the rate but not the temperature sensitivity of soil respiration	2005	>2.9	No_sandy			Helianthus annuus	Asteraceae	Taproot	Annual	91	8	13.75	1	Gigaspora gigantea	Gigasporaceae	Edaphophilic guild	0.147	0.0195128	0.0532569	0.194156	0.0192651	0.0423792	0.0480022
417	989	Mycorrhizal symbiosis induces divergent patterns of transport and partitioning of Cd and Zn in Populus trichocarpa	2019	<1	Sandy			Populus trichocarpa	Other	Taproot	Perennial	84	6	46	1	Rhizophagus irregularis	Glomeraceae	Rhizophilic guild	0.0892857	0.133531	0.0224817	-0.223144	0.0222917	0.108634	0.0216845
418	990	Mycorrhizas influence functional traits of two tallgrass prairie species	2016	<1	Sandy	No_P_deficient	Alkaline	Andropogon gerardii	Poaceae	Fibrous	Perennial	76	8		>1	Mixed	Mixed	Mixed	3.67735	0.410051	0.691089	0.199879	0.575998	0.248674	0.596224
418	991	Mycorrhizas influence functional traits of two tallgrass prairie species	2016	<1	Sandy	No_P_deficient	Alkaline	Elymus canadensis	Poaceae	Fibrous	Perennial	70	10		>1	Mixed	Mixed	Mixed	0.879991	0.0107801	0.00523075	-0.00146793	0.00705305	0.00506566	0.00596856
419	992	Mycorrhization of Micropropagated Leucaena leucocephala (Lam.) de Wit	1998		Sandy	No_P_deficient	Alkaline	Leucaena leucocephala	Fabaceae	Taproot	Perennial	90	5		1	Rhizophagus fasciculatus	Glomeraceae	Rhizophilic guild	0.323232	1.87413	0.276315	1.90024	0.0306532	1.88057	0.170981
420	993	15 N uptake by mycorrhizal native and invasive plants from a N-eutrophied shrubland: a greenhouse experiment	2004	>2.9	Sandy	No_P_deficient	Acidic	Artemisia californica	Asteraceae	Taproot	Annual	74	10	6.9	>1	Mixed	Mixed	Mixed	0.394473	-0.454582	0.069889	-0.43752	0.0761594	-0.449726	0.0714063
420	994	15 N uptake by mycorrhizal native and invasive plants from a N-eutrophied shrubland: a greenhouse experiment	2004	>2.9	Sandy	No_P_deficient	Acidic	Artemisia californica	Asteraceae	Taproot	Annual	68	10	9.8	>1	Mixed	Mixed	Mixed	0.780408	0.153251	0.013653	-0.476065	0.0397071	-0.07581	0.0203371
420	995	15 N uptake by mycorrhizal native and invasive plants from a N-eutrophied shrubland: a greenhouse experiment	2004	>2.9	Sandy	No_P_deficient	Acidic	Bromus madritensis	Poaceae	Fibrous	Annual	74	10	9.6	>1	Mixed	Mixed	Mixed	0.396513	-0.0858678	0.0550916	-0.186351	0.0470193	-0.113387	0.0528609
421	996	Native arbuscular mycorrhizal fungi increase the abundance of ammonia- oxidizing bacteria, but suppress nitrous oxide emissions shortly after urea application	2018	1_2.9	No_sandy	No_P_deficient		Brachiaria decumbens	Poaceae	Fibrous	Perennial	106	4	71	>1	Mixed	Mixed	Mixed	0.104637	-0.186843	0.00137087	-0.19074	0.0156291	-0.187212	0.0019188
422	997	Nickel remediation by AM-colonized sunflower	2010	>2.9	Sandy	P_deficent	Acidic	Helianthus annuus	Asteraceae	Taproot	Annual	70	5	78	1	Rhizophagus intraradices	Glomeraceae	Rhizophilic guild	0.184201	0.305312	0.00570053	0.752422	0.0187248	0.389374	0.00724029
423	998	Nickel tolerance of serpentine and non-serpentine Knautia arvensis plants as affected by arbuscular mycorrhizal symbiosis	2014	1_2.9	Sandy			Knautia arvensis	Other	Fibrous	Perennial	84	6	64	1	Rhizophagus irregularis	Glomeraceae	Rhizophilic guild	1.27457	0.178314	0.0643455	0.167264	0.0645322	0.172137	0.0643253
424	999	Nickel-tolerant Brevibacillus brevis and arbuscular mycorrhizal fungus can reduce metal acquisition and nickel toxicity effects in plant growing in nickel supplemented soil	2006	<1	Sandy	P_deficent	Neutral	Trifolium repens	Fabaceae	Fibrous	Perennial	90	5	50	1	Funneliformis mosseae	Glomeraceae	Rhizophilic guild	0.454621	1.07454	0.004	0.855396	0.004	1.01106	0.004
425	1000	Nitric Oxide Accelerates Mycorrhizal Effects on Plant Growth and Root Development of Trifoliate Orange	2017	>2.9	Sandy			Trifolium repens	Fabaceae	Fibrous	Perennial	108	4	42	1	Diversispora versiformis	Diversisporaceae	Edaphophilic guild	0.577396	0.160798	0.00450729	0.108759	0.00523065	0.142062	0.00475866
426	1001	Nitrogen fertilizer enhances growth and nutrient uptake of Medicago sativa inoculated with Glomus tortuosum grown in Cd-contaminated acidic soil	2017	<1	No_sandy		Acidic	Medicago sativa	Fabaceae	Taproot	Perennial	130	4	17	1	Glomus aggregatum	Glomeraceae	Rhizophilic guild	1.26	0.380464	0.00201266	0.174941	0.00941474	0.262989	0.00250895
426	1002	Nitrogen fertilizer enhances growth and nutrient uptake of Medicago sativa inoculated with Glomus tortuosum grown in Cd-contaminated acidic soil	2017	<1	No_sandy		Acidic	Medicago sativa	Fabaceae	Taproot	Perennial	130	4	42	1	Glomus tortuosum	Glomeraceae	Rhizophilic guild	1.26	0.532805	0.00432543	0.269129	0.00813245	0.386313	0.0042883
427	1003	Nitrogen isotope fractionation during N uptake via arbuscular mycorrhizal and ectomycorrhizal fungi into grey alder	2016	<1	Sandy			Alnus incana	Other	Taproot	Perennial	112	5	80	1	Rhizophagus irregularis	Glomeraceae	Rhizophilic guild	1.35294	-0.249216	0.00895324	-0.16508	0.0223498	-0.199976	0.0159053
428	1004	Non-hydraulic root-to-shoot signalling in mycorrhizal and non-mycorrhizal sorghum exposed to partial soil drying or root severing	1994	1_2.9	No_sandy			Sorghum hicolo	Poaceae	Fibrous	Annual	24	6		1	Rhizophagus intraradices	Glomeraceae	Rhizophilic guild	0.460938	0.194615	0.00333333	0.112117	0.00333333	0.169314	0.00333333
429	1005	Nonhydraulic signalling of soil drying in myeorrhizal maize	1993	1_2.9	Sandy			Zea mays	Poaceae	Fibrous	Annual	38	7	32	1	Rhizophagus intraradices	Glomeraceae	Rhizophilic guild	0.144509	0.0452054	0.00285714	0.392042	0.00285714	0.096228	0.00285714
430	1006	Pearl millet growth and biochemical alterations determined by mycorrhizal inoculation, water availability and atmospheric CO 2 concentration	2015	>2.9	Sandy	No_P_deficient	Acidic	Pennisetum glaucum	Poaceae	Fibrous	Annual	65	8		1	Rhizophagus intraradices	Glomeraceae	Rhizophilic guild	0.258706	-0.312872	0.00158305	-0.415127	0.00436997	-0.333053	0.00194646
431	1007	Phenanthrene uptake by Medicago sativa L. under the influence of an arbuscular mycorrhizal fungus	2009	<1	Sandy	P_deficent	Alkaline	Medicago sativa	Fabaceae	Taproot	Perennial	60	3	69.9	1	Claroideoglomus etunicatum	Claroideoglomeraceae	Rhizophilic guild	0.4375	-0.233615	0.0532099	-0.271934	0.0178926	-0.245122	0.0333322
432	1008	Phosphate Uptake is Correlated with the Root Length of Celery Plants Following the Association between Arbuscular Mycorrhizal Fungi, Pseudomonas sp. and Biochar with Different Phosphate Fertilization Levels	2019	1_2.9	Sandy	No_P_deficient		Apium graveolens	Other	Taproot	Annual	56	7	38	1	Funneliformis mosseae	Glomeraceae	Rhizophilic guild	0.538462	0.143101	0.0025904	0	0.0102041	0.0953102	0.00456612
433	1009	Phosphorus effect on phosphatase activity in endomycorrhizal maize	1998	1_2.9	Sandy	P_deficent	Neutral	Zea mays	Poaceae	Fibrous	Annual	21	5	44	1	Rhizophagus intraradices	Glomeraceae	Rhizophilic guild	0.791045	0.0993725	0.004	-0.141651	0.004	-2.22e-16	0.004
434	1010	Phosphorus efficiencies and responses of barley ( Hordeum vulgare L.) to arbuscular mycorrhizal fungi grown in highly calcareous soil	2003	1_2.9	No_sandy	No_P_deficient	Alkaline	Hordeum vulgare	Poaceae	Fibrous	Annual	56	4	44.5	1	Rhizophagus intraradices	Glomeraceae	Rhizophilic guild	0.131897	-0.124703	0.005	-0.294239	0.005	-0.143042	0.005
434	1011	Phosphorus efficiencies and responses of barley ( Hordeum vulgare L.) to arbuscular mycorrhizal fungi grown in highly calcareous soil	2003	1_2.9	No_sandy	No_P_deficient	Alkaline	Hordeum vulgare	Poaceae	Fibrous	Annual	56	4	55	1	Rhizophagus intraradices	Glomeraceae	Rhizophilic guild	0.151286	-0.343151	0.005	-0.174353	0.005	-0.319275	0.005
434	1012	Phosphorus efficiencies and responses of barley ( Hordeum vulgare L.) to arbuscular mycorrhizal fungi grown in highly calcareous soil	2003	1_2.9	No_sandy	No_P_deficient	Alkaline	Hordeum vulgare	Poaceae	Fibrous	Annual	56	4	50	1	Rhizophagus intraradices	Glomeraceae	Rhizophilic guild	0.347754	-0.35359	0.005	-0.292478	0.005	-0.33746	0.005
434	1013	Phosphorus efficiencies and responses of barley ( Hordeum vulgare L.) to arbuscular mycorrhizal fungi grown in highly calcareous soil	2003	1_2.9	No_sandy	No_P_deficient	Alkaline	Hordeum vulgare	Poaceae	Fibrous	Annual	56	4	46	1	Rhizophagus intraradices	Glomeraceae	Rhizophilic guild	0.482482	-0.0780427	0.005	-0.0934447	0.005	-0.0830294	0.005
435	1014	Phosphorus Source, Organic Matter, and Arbuscular Mycorrhiza Effects on Growth and Mineral Acquisition of Chickpea Grown in Acidic Soil	2000	1_2.9	Sandy	P_deficent	Acidic	Cicer arietinum	Fabaceae	Taproot	Annual	56	4	13.1	1	Glornus darum	Glomeraceae	Rhizophilic guild	0.624521	0.168821	0.005	-0.173769	0.005	0.0505855	0.005
436	1015	Phosphorus uptake and growth of barley as affected by soil temperature and mycorrhizal infection	1994	1_2.9	No_sandy	P_deficent	Alkaline	Hordeum vulgare	Poaceae	Fibrous	Annual	48	3	12.3	1	Rhizophagus intraradices	Glomeraceae	Rhizophilic guild	0.702041	-0.055599	0.00666667	-0.257145	0.00666667	-0.133874	0.00666667
437	1016	Physiological activity of a bioluminescent Pseudomonas fluorescens (strain 2–79) in the rhizosphere of mycorrhizal and non-mycorrhizal pepper (Capsicum annuum L)	1996		No_sandy		Neutral	Capsicum annuum	Solanaceae	Fibrous	Annual	42	6	40	1	Rhizophagus intraradices	Glomeraceae	Rhizophilic guild	0.670588	-0.0420482	0.00333333	-0.0727594	0.00333333	-0.0542629	0.00333333
437	1017	Physiological activity of a bioluminescent Pseudomonas fluorescens (strain 2–79) in the rhizosphere of mycorrhizal and non-mycorrhizal pepper (Capsicum annuum L)	1996		No_sandy		Neutral	Capsicum annuum	Solanaceae	Fibrous	Annual	42	6	15	1	Glomus deserriculum	Glomeraceae	Rhizophilic guild	0.670588	-0.408411	0.00333333	-0.354172	0.00333333	-0.386284	0.00333333
438	1018	Physiological responses of halophytic C 4 grass, Aeluropus littoralis to salinity and arbuscular mycorrhizal fungi colonization	2015	1_2.9				Aeluropus littoralis	Poaceae	Fibrous	Annual	140	4	32	1	Claroideoglomus etunicatum	Claroideoglomeraceae	Rhizophilic guild	0.109912	-0.167054	0.0258158	-0.111397	0.0382709	-0.161402	0.0267593
439	1019	Physiological responses of 6 wheatgrass cultivars to mycorrhizae	1991	<1	No_sandy	No_P_deficient	Alkaline	Agropyron cristatum	Poaceae	Fibrous	Perennial	70	6	32.6	>1	Mixed	Mixed	Mixed	0.546741	-0.056763	0.0075327	0.0143076	0.00873086	-0.0310599	0.00790489
440	1020	Phytoprotective Effect of Arbuscular Mycorrhizal Fungi Species Against Arsenic Toxicity in Tropical Leguminous Species	2014	>2.9	Sandy	No_P_deficient	Acidic	Acacia mangium	Fabaceae	Taproot	Perennial	60	4	25	1	Claroideoglomus etunicatum	Claroideoglomeraceae	Rhizophilic guild	0.752345	0.571761	0.015482	-0.0291643	0.00115338	0.356177	0.00949256
440	1021	Phytoprotective Effect of Arbuscular Mycorrhizal Fungi Species Against Arsenic Toxicity in Tropical Leguminous Species	2014	>2.9	Sandy	No_P_deficient	Acidic	Acacia mangium	Fabaceae	Taproot	Perennial	60	4	25	1	Gigaspora gigantea	Gigasporaceae	Edaphophilic guild	0.752345	0.463516	0.00447207	-0.132017	0.000485348	0.24951	0.00279036
440	1022	Phytoprotective Effect of Arbuscular Mycorrhizal Fungi Species Against Arsenic Toxicity in Tropical Leguminous Species	2014	>2.9	Sandy	No_P_deficient	Acidic	Acacia mangium	Fabaceae	Taproot	Perennial	60	4	26	1	Acaulospora morrowiae	Acaulosporaceae	Ancestral guild	0.752345	0.938738	0.00103421	-0.085433	0.000526028	0.616928	0.000815942
440	1023	Phytoprotective Effect of Arbuscular Mycorrhizal Fungi Species Against Arsenic Toxicity in Tropical Leguminous Species	2014	>2.9	Sandy	No_P_deficient	Acidic	Acacia mangium	Fabaceae	Taproot	Perennial	60	4	28	1	Acaulospora sp.	Acaulosporaceae	Ancestral guild	0.752345	0.966558	0.00484673	0.0358068	0.000500309	0.665363	0.00333762
440	1024	Phytoprotective Effect of Arbuscular Mycorrhizal Fungi Species Against Arsenic Toxicity in Tropical Leguminous Species	2014	>2.9	Sandy	No_P_deficient	Acidic	Crotalaria juncea	Fabaceae	Taproot	Annual	60	4	25	1	Claroideoglomus etunicatum	Claroideoglomeraceae	Rhizophilic guild	0.447454	-0.209786	0.00978338	-0.290486	0.00366854	-0.234045	0.00688419
440	1025	Phytoprotective Effect of Arbuscular Mycorrhizal Fungi Species Against Arsenic Toxicity in Tropical Leguminous Species	2014	>2.9	Sandy	No_P_deficient	Acidic	Crotalaria juncea	Fabaceae	Taproot	Annual	60	4	22	1	Gigaspora gigantea	Gigasporaceae	Edaphophilic guild	0.447454	0.128757	0.000555182	0.0925803	0.00267998	0.117713	0.000913572
440	1026	Phytoprotective Effect of Arbuscular Mycorrhizal Fungi Species Against Arsenic Toxicity in Tropical Leguminous Species	2014	>2.9	Sandy	No_P_deficient	Acidic	Crotalaria juncea	Fabaceae	Taproot	Annual	60	4	26	1	Acaulospora morrowiae	Acaulosporaceae	Ancestral guild	0.447454	0.208971	0.00228589	0.143477	0.00296024	0.189179	0.0020923
440	1027	Phytoprotective Effect of Arbuscular Mycorrhizal Fungi Species Against Arsenic Toxicity in Tropical Leguminous Species	2014	>2.9	Sandy	No_P_deficient	Acidic	Crotalaria juncea	Fabaceae	Taproot	Annual	60	4	22	1	Acaulospora sp.	Acaulosporaceae	Ancestral guild	0.447454	-0.221533	0.00189221	0.241462	0.0092158	-0.0543042	0.00400159
440	1028	Phytoprotective Effect of Arbuscular Mycorrhizal Fungi Species Against Arsenic Toxicity in Tropical Leguminous Species	2014	>2.9	Sandy	No_P_deficient	Acidic	Enterolobium contortisiliquum	Fabaceae	Taproot	Perennial	60	4	21	1	Claroideoglomus etunicatum	Claroideoglomeraceae	Rhizophilic guild	0.413826	0.158422	0.00252412	0.125366	0.0342267	0.14886	0.0074564
440	1029	Phytoprotective Effect of Arbuscular Mycorrhizal Fungi Species Against Arsenic Toxicity in Tropical Leguminous Species	2014	>2.9	Sandy	No_P_deficient	Acidic	Enterolobium contortisiliquum	Fabaceae	Taproot	Perennial	60	4	25	1	Gigaspora gigantea	Gigasporaceae	Edaphophilic guild	0.413826	0.351579	0.00431093	0.334544	0.0262333	0.346623	0.00869118
440	1030	Phytoprotective Effect of Arbuscular Mycorrhizal Fungi Species Against Arsenic Toxicity in Tropical Leguminous Species	2014	>2.9	Sandy	No_P_deficient	Acidic	Enterolobium contortisiliquum	Fabaceae	Taproot	Perennial	60	4	24	1	Acaulospora morrowiae	Acaulosporaceae	Ancestral guild	0.413826	-0.0459407	0.00408095	-0.0337892	0.0248568	-0.0423687	0.00823126
440	1031	Phytoprotective Effect of Arbuscular Mycorrhizal Fungi Species Against Arsenic Toxicity in Tropical Leguminous Species	2014	>2.9	Sandy	No_P_deficient	Acidic	Enterolobium contortisiliquum	Fabaceae	Taproot	Perennial	60	4	21	1	Acaulospora sp.	Acaulosporaceae	Ancestral guild	0.413826	-0.0891387	0.0121257	-0.0457989	0.027591	-0.0762576	0.0148182
440	1032	Phytoprotective Effect of Arbuscular Mycorrhizal Fungi Species Against Arsenic Toxicity in Tropical Leguminous Species	2014	>2.9	Sandy	No_P_deficient	Acidic	Stizolobium aterrimum	Fabaceae	Fibrous	Annual	60	4	19	1	Claroideoglomus etunicatum	Claroideoglomeraceae	Rhizophilic guild	0.45231	0.45974	0.00832095	-0.107383	0.016918	0.314939	0.00998888
440	1033	Phytoprotective Effect of Arbuscular Mycorrhizal Fungi Species Against Arsenic Toxicity in Tropical Leguminous Species	2014	>2.9	Sandy	No_P_deficient	Acidic	Stizolobium aterrimum	Fabaceae	Fibrous	Annual	60	4	24	1	Gigaspora gigantea	Gigasporaceae	Edaphophilic guild	0.45231	0.26864	0.00139043	-0.125408	0.0177938	0.16169	0.0037913
440	1034	Phytoprotective Effect of Arbuscular Mycorrhizal Fungi Species Against Arsenic Toxicity in Tropical Leguminous Species	2014	>2.9	Sandy	No_P_deficient	Acidic	Stizolobium aterrimum	Fabaceae	Fibrous	Annual	60	4	24	1	Acaulospora morrowiae	Acaulosporaceae	Ancestral guild	0.45231	0.513661	0.00167146	0.139389	0.0161764	0.411368	0.00398818
440	1035	Phytoprotective Effect of Arbuscular Mycorrhizal Fungi Species Against Arsenic Toxicity in Tropical Leguminous Species	2014	>2.9	Sandy	No_P_deficient	Acidic	Stizolobium aterrimum	Fabaceae	Fibrous	Annual	60	4	20	1	Acaulospora sp.	Acaulosporaceae	Ancestral guild	0.45231	0.0715359	0.00205267	-0.668466	0.0108231	-0.106215	0.00347282
441	1036	Phytoremediation of soil co-contaminated with Cd and BDE-209 using hyperaccumulator enhanced by AM fungi and surfactant	2018	1_2.9	No_sandy		Acidic	Solanum nigrum	Solanaceae	Fibrous	Annual	35	4	87.3	1	Funneliformis mosseae	Glomeraceae	Rhizophilic guild	0.14731	0.207369	0.000387449	0.219875	0.00747996	0.208984	0.000744599
441	1037	Phytoremediation of soil co-contaminated with Cd and BDE-209 using hyperaccumulator enhanced by AM fungi and surfactant	2018	1_2.9	No_sandy		Acidic	Solanum nigrum	Solanaceae	Fibrous	Annual	35	4	83.2	1	Rhizophagus intraradices	Glomeraceae	Rhizophilic guild	0.14731	-0.102834	0.0039912	0.0102152	0.0127138	-0.0875834	0.00463514
442	1038	Plant and soil responses to mycorrhizal fungi and rhizobacteria in nodulated or nitrate-fertilized peas (Pisum sativum L.)	1997	<1	Sandy	No_P_deficient	Neutral	Pisum sativum	Fabaceae	Taproot	Annual	60	5	46.6	1	Funneliformis mosseae	Glomeraceae	Rhizophilic guild	0.144	-0.0339016	0.0056335	0.189242	0.004	-0.00291801	0.00538297
443	1039	Plant development and synthesis of essential oils in micropropagated and mycorrhiza inoculated plants of Origanum vulgare L. ssp. hirtum (Link) Ietswaart	2008		No_sandy			Origanum vulgare	Other	Fibrous	Perennial	180	5	85.7	1	Glomus viscosum	Glomeraceae	Rhizophilic guild	0.274194	1.31673	0.00373141	1.52776	0.00692136	1.36605	0.00437741
443	1040	Plant development and synthesis of essential oils in micropropagated and mycorrhiza inoculated plants of Origanum vulgare L. ssp. hirtum (Link) Ietswaart	2008		No_sandy			Origanum vulgare	Other	Fibrous	Perennial	180	5	85.4	1	Glomus viscosum	Glomeraceae	Rhizophilic guild	0.307692	1.07264	0.00616647	0.693147	0.0125	0.995428	0.0072546
444	1041	Plant growth, phosphorus nutrition, and root morphological responses to arbuscular mycorrhizas, phosphorus fertilization, and intraspecific density	2005	1_2.9	No_sandy	P_deficent		Capsicum annuum	Solanaceae	Fibrous	Annual	70	9	14.8	1	Glomus sp.	Glomeraceae	Rhizophilic guild	0.185779	0.622532	0.0456579	0.679416	0.104086	0.631661	0.0528095
444	1042	Plant growth, phosphorus nutrition, and root morphological responses to arbuscular mycorrhizas, phosphorus fertilization, and intraspecific density	2005	1_2.9	No_sandy	P_deficent		Cucurbita pepo	Other	Fibrous	Annual	70	9	18	1	Glomus sp.	Glomeraceae	Rhizophilic guild	0.0923036	-0.173378	0.0256833	-0.0468308	0.119855	-0.162043	0.0312747
444	1043	Plant growth, phosphorus nutrition, and root morphological responses to arbuscular mycorrhizas, phosphorus fertilization, and intraspecific density	2005	1_2.9	No_sandy	P_deficent		Zea mays	Poaceae	Fibrous	Annual	70	9	32.5	1	Glomus sp.	Glomeraceae	Rhizophilic guild	0.217024	0.0810908	0.0457612	-0.25647	0.169556	0.0286515	0.0596475
445	1044	Plant nitrogen acquisition and interactions under elevated carbon dioxide: impact of endophytes and mycorrhizae	2007	>2.9	Sandy		Neutral	Plantago lanceolata	Other	Fibrous	Perennial	98	4	31	>1	Mixed	Mixed	Mixed	0.438018	-0.274725	0.0225743	-0.449477	0.0438302	-0.324795	0.0280024
446	1045	Plant tolerance to mercury in a contaminated soil is enhanced by the combined effects of humic matter addition and inoculation with arbuscular mycorrhizal fungi	2016	<1	Sandy	P_deficent	Alkaline	Lactuca sativa	Asteraceae	Taproot	Annual	63	5	58.5	>1	Mixed	Mixed	Mixed	0.208754	0.120398	0.000297711	0.315517	0.000435909	0.156932	0.000318607
447	1046	Pool sizes of fructans in roots and leaves of mycorrhizal and non-mycorrhizal barley	1999		Sandy			Hordeum vulgare	Poaceae	Fibrous	Annual	50	3	54	1	Funneliformis mosseae	Glomeraceae	Rhizophilic guild	2.22907	-0.177926	0.0231875	-0.483533	0.0167184	-0.378546	0.0175301
448	1047	Potential of arbuscular mycorrhizae and tall fescue in remediation of soils polluted with zinc	2020	>2.9	Sandy	P_deficent	Alkaline	Festuca arundinacea	Poaceae	Fibrous	Perennial	112	5	30.1	1	Rhizophagus intraradices	Glomeraceae	Rhizophilic guild	0.249295	0.0786577	0.00102211	0.231846	0.000750705	0.111158	0.000886694
448	1048	Potential of arbuscular mycorrhizae and tall fescue in remediation of soils polluted with zinc	2020	>2.9	Sandy	P_deficent	Alkaline	Festuca arundinacea	Poaceae	Fibrous	Perennial	112	5	28.8	1	Funneliformis mosseae	Glomeraceae	Rhizophilic guild	0.249295	0.0917628	0.00161466	0.0126025	0.000934483	0.076459	0.00141784
448	1049	Potential of arbuscular mycorrhizae and tall fescue in remediation of soils polluted with zinc	2020	>2.9	Sandy	P_deficent	Alkaline	Festuca arundinacea	Poaceae	Fibrous	Perennial	112	5	29.1	1	Diversispora versiformis	Diversisporaceae	Edaphophilic guild	0.249295	0.143505	0.000792247	0.19052	0.000639085	0.153065	0.000689403
449	1050	Potential of Crotalaria species as green manure crops for the management of pathogenic nematodes and beneficial mycorrhizal fungi	2004	<1	Sandy	P_deficent	Acidic	Crotalaria arenaria	Fabaceae	Taproot	Annual	60	6	47	1	Rhizophagus intraradices	Glomeraceae	Rhizophilic guild	0.434783	1.97045	0.00333333	0.955511	0.00333333	1.75577	0.00333333
449	1051	Potential of Crotalaria species as green manure crops for the management of pathogenic nematodes and beneficial mycorrhizal fungi	2004	<1	Sandy	P_deficent	Acidic	Crotalaria barkae	Fabaceae	Taproot	Annual	60	6	67	1	Rhizophagus intraradices	Glomeraceae	Rhizophilic guild	0.344828	1.11004	0.00333333	1.50408	0.00333333	1.22679	0.00333333
449	1052	Potential of Crotalaria species as green manure crops for the management of pathogenic nematodes and beneficial mycorrhizal fungi	2004	<1	Sandy	P_deficent	Acidic	Crotalaria calycina	Fabaceae	Taproot	Annual	60	6	46	1	Rhizophagus intraradices	Glomeraceae	Rhizophilic guild	0.464	1.08519	0.00333333	1.21767	0.00333333	1.12911	0.00333333
449	1053	Potential of Crotalaria species as green manure crops for the management of pathogenic nematodes and beneficial mycorrhizal fungi	2004	<1	Sandy	P_deficent	Acidic	Crotalaria comosa	Fabaceae	Taproot	Annual	60	6	58	1	Rhizophagus intraradices	Glomeraceae	Rhizophilic guild	0.670807	0.866631	0.00333333	0.798508	0.00333333	0.839835	0.00333333
449	1054	Potential of Crotalaria species as green manure crops for the management of pathogenic nematodes and beneficial mycorrhizal fungi	2004	<1	Sandy	P_deficent	Acidic	Crotalaria cylindrocarpa	Fabaceae	Taproot	Annual	60	6	46	1	Rhizophagus intraradices	Glomeraceae	Rhizophilic guild	0.393939	1.52077	0.00333333	1.34707	0.00333333	1.47466	0.00333333
449	1055	Potential of Crotalaria species as green manure crops for the management of pathogenic nematodes and beneficial mycorrhizal fungi	2004	<1	Sandy	P_deficent	Acidic	Crotalaria glaucoides	Fabaceae	Taproot	Annual	60	6	59	1	Rhizophagus intraradices	Glomeraceae	Rhizophilic guild	0.869565	1.81681	0.00333333	1.25988	0.00333333	1.59539	0.00333333
449	1056	Potential of Crotalaria species as green manure crops for the management of pathogenic nematodes and beneficial mycorrhizal fungi	2004	<1	Sandy	P_deficent	Acidic	Crotalaria goreensis	Fabaceae	Taproot	Annual	60	6	64	1	Rhizophagus intraradices	Glomeraceae	Rhizophilic guild	0.3125	1.19139	0.00333333	1.4816	0.00333333	1.26851	0.00333333
449	1057	Potential of Crotalaria species as green manure crops for the management of pathogenic nematodes and beneficial mycorrhizal fungi	2004	<1	Sandy	P_deficent	Acidic	Crotalaria grantiana	Fabaceae	Taproot	Annual	60	6	54	1	Rhizophagus intraradices	Glomeraceae	Rhizophilic guild	0.484211	1.79351	0.00333333	1.35314	0.00333333	1.66998	0.00333333
449	1058	Potential of Crotalaria species as green manure crops for the management of pathogenic nematodes and beneficial mycorrhizal fungi	2004	<1	Sandy	P_deficent	Acidic	Crotalaria hyssopifolia	Fabaceae	Taproot	Annual	60	6	53	1	Rhizophagus intraradices	Glomeraceae	Rhizophilic guild	0.615385	0.948726	0.00333333	0.451985	0.00333333	0.78722	0.00333333
449	1059	Potential of Crotalaria species as green manure crops for the management of pathogenic nematodes and beneficial mycorrhizal fungi	2004	<1	Sandy	P_deficent	Acidic	Crotalaria lathyroides	Fabaceae	Taproot	Annual	60	6	42	1	Rhizophagus intraradices	Glomeraceae	Rhizophilic guild	0.1	0.318454	0.00333333	1.09861	0.00333333	0.420503	0.00333333
449	1060	Potential of Crotalaria species as green manure crops for the management of pathogenic nematodes and beneficial mycorrhizal fungi	2004	<1	Sandy	P_deficent	Acidic	Crotalaria ochroleuca	Fabaceae	Taproot	Annual	60	6	45	1	Rhizophagus intraradices	Glomeraceae	Rhizophilic guild	0.565217	1.12012	0.00333333	1.05939	0.00333333	1.09861	0.00333333
449	1061	Potential of Crotalaria species as green manure crops for the management of pathogenic nematodes and beneficial mycorrhizal fungi	2004	<1	Sandy	P_deficent	Acidic	Crotalaria pallida	Fabaceae	Taproot	Annual	60	6	58	1	Rhizophagus intraradices	Glomeraceae	Rhizophilic guild	0.733333	0.82198	0.00333333	0.553101	0.00333333	0.716901	0.00333333
449	1062	Potential of Crotalaria species as green manure crops for the management of pathogenic nematodes and beneficial mycorrhizal fungi	2004	<1	Sandy	P_deficent	Acidic	Crotalaria perrotteti	Fabaceae	Taproot	Annual	60	6	50	1	Rhizophagus intraradices	Glomeraceae	Rhizophilic guild	0.288889	1.24319	0.00333333	2.14458	0.00333333	1.52681	0.00333333
449	1063	Potential of Crotalaria species as green manure crops for the management of pathogenic nematodes and beneficial mycorrhizal fungi	2004	<1	Sandy	P_deficent	Acidic	Crotalaria podocarpa	Fabaceae	Taproot	Annual	60	6	21	1	Rhizophagus intraradices	Glomeraceae	Rhizophilic guild	0.214286	0.76214	0.00333333	1.74759	0.00333333	1.02165	0.00333333
449	1064	Potential of Crotalaria species as green manure crops for the management of pathogenic nematodes and beneficial mycorrhizal fungi	2004	<1	Sandy	P_deficent	Acidic	Crotalaria retusa	Fabaceae	Taproot	Annual	60	6	30	1	Rhizophagus intraradices	Glomeraceae	Rhizophilic guild	0.283019	1.13565	0.00333333	0.550046	0.00333333	1.03277	0.00333333
449	1065	Potential of Crotalaria species as green manure crops for the management of pathogenic nematodes and beneficial mycorrhizal fungi	2004	<1	Sandy	P_deficent	Acidic	Crotalaria senegalensis	Fabaceae	Taproot	Annual	60	6	43	1	Rhizophagus intraradices	Glomeraceae	Rhizophilic guild	0.21791	0.39647	0.00333333	1.03742	0.00333333	0.545511	0.00333333
449	1066	Potential of Crotalaria species as green manure crops for the management of pathogenic nematodes and beneficial mycorrhizal fungi	2004	<1	Sandy	P_deficent	Acidic	Crotalaria sphaerocarpa	Fabaceae	Taproot	Annual	60	6	40	1	Rhizophagus intraradices	Glomeraceae	Rhizophilic guild	1.11842	1.27874	0.00333333	1.18497	0.00333333	1.23033	0.00333333
450	1067	Pre‐inoculation by an Arbuscular Mycorrhizal Fungus Enhances Male Reproductive Output of Cucurbita foetidissima	2000	>2.9	Sandy	No_P_deficient	Alkaline	Cucurbita foetidissima	Other	Fibrous	Annual	56	19		1	Rhizophagus intraradices	Glomeraceae	Rhizophilic guild	0.432675	0.0975114	0.0101489	0.0353146	0.00926655	0.079132	0.00942402
451	1068	Protecting Cucumber from Fusarium Wilt with Arbuscular Mycorrhizal Fungi	2012	<1	Sandy			Cucumis sativus	Other	Taproot	Annual	42	5	42.3	1	Diversispora versiformis	Diversisporaceae	Edaphophilic guild	0.0538462	0.37949	0.00854841	0.451985	0.0286726	0.383324	0.00910322
451	1069	Protecting Cucumber from Fusarium Wilt with Arbuscular Mycorrhizal Fungi	2012	<1	Sandy			Cucumis sativus	Other	Taproot	Annual	42	5	36.8	1	Funneliformis mosseae	Glomeraceae	Rhizophilic guild	0.0538462	0.869038	0.0111846	0.887303	0.0238684	0.869979	0.0117069
452	1070	Quantification of Water Uptake by Arbuscular Mycorrhizal Hyphae and its Significance for Leaf Growth, Water Relations, and Gas Exchange of Barley Subjected to Drought Stress	2005	>2.9	No_sandy			Hordeum vulgare	Poaceae	Fibrous	Annual	90	3		1	Rhizophagus intraradices	Glomeraceae	Rhizophilic guild	0.891892	-0.027399	0.00666667	0.029853	0.00666667	0	0.00666667
453	1071	Reactive oxygen metabolism in mycorrhizal and non-mycorrhizal citrus (Poncirus trifoliata) seedlings subjected to water stress	2005	>2.9	No_sandy	No_P_deficient	Acidic	Poncirus trifoliata	Rutaceae	Taproot	Perennial	80	6	36.98	1	Diversispora versiformis	Diversisporaceae	Edaphophilic guild	0.42	0.14842	0.00375991	0.154151	0.0032471	0.150118	0.00360352
454	1072	Reducing Water Availability Impacts the Development of the Arbuscular Mycorrhizal Fungus Rhizophagus irregularis MUCL 41833 and Its Ability to Take Up and Transport Phosphorus Under in Vitro Conditions	2018		Sandy		Acidic	Medicago truncatula	Fabaceae	Taproot	Perennial	63	6		1	Rhizophagus intraradices	Glomeraceae	Rhizophilic guild	0.961853	0.110795	0.00635339	-2.1288	0.257953	-0.465569	0.0106856
455	1073	Reduction of nematode damage by root colonization with arbuscular mycorrhiza (Glomus spp.) in tomato-Meloidogyne incognita (Tylenchida: Meloidogynidae) and carrot-Pratylenchus penetrans (Tylenchida: Pratylenchidae) pathosystems	2001	<1	No_sandy			Lycopersicon esculentum	Solanaceae	Taproot	Annual	84	5	61.2	1	Funneliformis mosseae	Glomeraceae	Rhizophilic guild	0.537572	0.0452054	0.004	0.121361	0.004	0.0724955	0.004
456	1074	Reduction of the juvenile period of new olive plantations through the early application of mycorrhizal fungi	2006	1_2.9	Sandy			Olea europaea	Other	Taproot	Perennial	360	18	100	1	Rhizophagus intraradices	Glomeraceae	Rhizophilic guild	0.629921	0.933465	0.00111111	0.832909	0.00111111	0.895792	0.00111111
456	1075	Reduction of the juvenile period of new olive plantations through the early application of mycorrhizal fungi	2006	1_2.9	Sandy			Olea europaea	Other	Taproot	Perennial	360	18	100	1	Funneliformis mosseae	Glomeraceae	Rhizophilic guild	0.629921	0.914715	0.00111111	0.799757	0.00111111	0.871839	0.00111111
456	1076	Reduction of the juvenile period of new olive plantations through the early application of mycorrhizal fungi	2006	1_2.9	Sandy			Olea europaea	Other	Taproot	Perennial	360	18	100	1	Claroideoglomus claroideum	Claroideoglomeraceae	Rhizophilic guild	0.629921	1.09861	0.00111111	1.03407	0.00111111	1.07416	0.00111111
457	1077	Relative importance of an arbuscular mycorrhizal fungus (Rhizophagus intraradices) and root hairs in plant drought tolerance	2014	<1	No_sandy	P_deficent	Alkaline	Hordeum vulgare	Poaceae	Fibrous	Annual	37	4	46	1	Rhizophagus intraradices	Glomeraceae	Rhizophilic guild	0.223682	0.334359	0.17417	0.501583	0.12452	0.36709	0.163663
457	1078	Relative importance of an arbuscular mycorrhizal fungus (Rhizophagus intraradices) and root hairs in plant drought tolerance	2014	<1	No_sandy	P_deficent	Alkaline	Hordeum vulgare	Poaceae	Fibrous	Annual	37	4	46	1	Rhizophagus intraradices	Glomeraceae	Rhizophilic guild	0.300407	-0.0155945	0.00632998	0.10922	0.0762673	0.0146533	0.0148366
458	1079	Response of Antioxidant Enzymes, Phytochelatins and Glutathione Production Towards Cd and Zn Stresses in Cajanus cajan (L.) Millsp. Genotypes Colonized by Arbuscular Mycorrhizal Fungi	2012	>2.9	Sandy	No_P_deficient	Neutral	Cajanus cajan	Fabaceae	Taproot	Perennial	80	2		1	Funneliformis mosseae	Glomeraceae	Rhizophilic guild	0.135714	0.327932	0.124815	0.363668	0.224004	0.332271	0.135325
459	1080	Response of Eucalyptus tereticornis to inoculation with indigenous AM fungi in a semiarid alfisol achieved with different concentrations of available soil P	2000	>2.9	No_sandy	P_deficent	Alkaline	Eucalyptus tereticornis	Other	Taproot	Perennial	112	6	18	>1	Mixed	Mixed	Mixed	0.358491	0.320168	0.00333333	0.233615	0.00333333	0.298045	0.00333333
460	1081	Response of maize genotypes to several mycorrhizal inoculums in terms of plant growth, nutrient uptake and spore production	2011	>2.9	No_sandy	P_deficent	Alkaline	Zea mays	Poaceae	Fibrous	Annual	56	3	90	1	Funneliformis mosseae	Glomeraceae	Rhizophilic guild	0.462585	-0.0416727	5.03e-05	0.637717	0.000713335	0.226549	0.00019222
460	1082	Response of maize genotypes to several mycorrhizal inoculums in terms of plant growth, nutrient uptake and spore production	2011	>2.9	No_sandy	P_deficent	Alkaline	Zea mays	Poaceae	Fibrous	Annual	56	3	70	1	Claroideoglomus etunicatum	Claroideoglomeraceae	Rhizophilic guild	0.462585	0.0888992	0.0502058	0.440782	0.000742716	0.214111	0.0203965
460	1083	Response of maize genotypes to several mycorrhizal inoculums in terms of plant growth, nutrient uptake and spore production	2011	>2.9	No_sandy	P_deficent	Alkaline	Zea mays	Poaceae	Fibrous	Annual	56	3	75	1	Funneliformis caledonium	Glomeraceae	Rhizophilic guild	0.462585	0.361426	0.00080862	0.853581	0.000737499	0.544665	0.000628973
460	1084	Response of maize genotypes to several mycorrhizal inoculums in terms of plant growth, nutrient uptake and spore production	2011	>2.9	No_sandy	P_deficent	Alkaline	Zea mays	Poaceae	Fibrous	Annual	56	3	75	1	Rhizophagus clarus	Glomeraceae	Rhizophilic guild	0.462585	-0.433053	0.000305651	0.428083	0.000751931	-0.0739887	0.000376661
460	1085	Response of maize genotypes to several mycorrhizal inoculums in terms of plant growth, nutrient uptake and spore production	2011	>2.9	No_sandy	P_deficent	Alkaline	Zea mays	Poaceae	Fibrous	Annual	56	3	70	1	Rhizophagus fasciculatus	Glomeraceae	Rhizophilic guild	0.462585	0.0508397	7.43e-05	0.51961	0.000690462	0.224073	0.000192978
460	1086	Response of maize genotypes to several mycorrhizal inoculums in terms of plant growth, nutrient uptake and spore production	2011	>2.9	No_sandy	P_deficent	Alkaline	Zea mays	Poaceae	Fibrous	Annual	56	3	60	1	Glomus macrocarpum	Glomeraceae	Rhizophilic guild	0.462585	-0.194642	0.00367311	0.351761	0.000681733	0.0123268	0.00174905
460	1087	Response of maize genotypes to several mycorrhizal inoculums in terms of plant growth, nutrient uptake and spore production	2011	>2.9	No_sandy	P_deficent	Alkaline	Zea mays	Poaceae	Fibrous	Annual	56	3	96.7	1	Rhizophagus intraradices	Glomeraceae	Rhizophilic guild	0.462585	0.076373	0.0441353	0.802177	0.000693609	0.367009	0.0134964
460	1088	Response of maize genotypes to several mycorrhizal inoculums in terms of plant growth, nutrient uptake and spore production	2011	>2.9	No_sandy	P_deficent	Alkaline	Zea mays	Poaceae	Fibrous	Annual	56	3	95	>1	Mixed	Glomeraceae	Rhizophilic guild	0.462585	-0.381935	0.00186533	0.162519	0.000662245	-0.175831	0.00102685
460	1089	Response of maize genotypes to several mycorrhizal inoculums in terms of plant growth, nutrient uptake and spore production	2011	>2.9	No_sandy	P_deficent	Alkaline	Zea mays	Poaceae	Fibrous	Annual	56	3	50	>1	Mixed	Glomeraceae	Rhizophilic guild	0.462585	-0.0680215	0.00603263	0.418452	0.000759077	0.112775	0.00280951
460	1090	Response of maize genotypes to several mycorrhizal inoculums in terms of plant growth, nutrient uptake and spore production	2011	>2.9	No_sandy	P_deficent	Alkaline	Zea mays	Poaceae	Fibrous	Annual	56	3	70	>1	Mixed	Mixed	Rhizophilic guild	0.462585	-0.202941	0.00373458	0.250225	0.000748665	-0.0363102	0.00192371
460	1091	Response of maize genotypes to several mycorrhizal inoculums in terms of plant growth, nutrient uptake and spore production	2011	>2.9	No_sandy	P_deficent	Alkaline	Zea mays	Poaceae	Fibrous	Annual	56	3	85	1	Funneliformis mosseae	Glomeraceae	Rhizophilic guild	0.622291	0.108452	0.00562502	0.352687	0.00974158	0.209308	0.00601229
460	1092	Response of maize genotypes to several mycorrhizal inoculums in terms of plant growth, nutrient uptake and spore production	2011	>2.9	No_sandy	P_deficent	Alkaline	Zea mays	Poaceae	Fibrous	Annual	56	3	76.7	1	Claroideoglomus etunicatum	Claroideoglomeraceae	Rhizophilic guild	0.622291	0.0972784	0.000789066	0.345669	0.00932716	0.199976	0.00277216
460	1093	Response of maize genotypes to several mycorrhizal inoculums in terms of plant growth, nutrient uptake and spore production	2011	>2.9	No_sandy	P_deficent	Alkaline	Zea mays	Poaceae	Fibrous	Annual	56	3	55	1	Funneliformis caledonium	Glomeraceae	Rhizophilic guild	0.622291	0.0153613	0.00628349	-0.541131	0.00952665	-0.163417	0.00655658
460	1094	Response of maize genotypes to several mycorrhizal inoculums in terms of plant growth, nutrient uptake and spore production	2011	>2.9	No_sandy	P_deficent	Alkaline	Zea mays	Poaceae	Fibrous	Annual	56	3	90	1	Rhizophagus clarus	Glomeraceae	Rhizophilic guild	0.622291	0.0153613	0.00335554	0.152016	0.00952665	0.0700102	0.00459743
460	1095	Response of maize genotypes to several mycorrhizal inoculums in terms of plant growth, nutrient uptake and spore production	2011	>2.9	No_sandy	P_deficent	Alkaline	Zea mays	Poaceae	Fibrous	Annual	56	3	75	1	Rhizophagus fasciculatus	Glomeraceae	Rhizophilic guild	0.622291	0.0745502	0.000297289	0.363122	0.00964058	0.195278	0.00238491
460	1096	Response of maize genotypes to several mycorrhizal inoculums in terms of plant growth, nutrient uptake and spore production	2011	>2.9	No_sandy	P_deficent	Alkaline	Zea mays	Poaceae	Fibrous	Annual	56	3	73.3	1	Glomus macrocarpum	Glomeraceae	Rhizophilic guild	0.622291	0.396134	0.00316409	0.38367	0.00944775	0.391371	0.00439677
460	1097	Response of maize genotypes to several mycorrhizal inoculums in terms of plant growth, nutrient uptake and spore production	2011	>2.9	No_sandy	P_deficent	Alkaline	Zea mays	Poaceae	Fibrous	Annual	56	3	90	1	Rhizophagus intraradices	Glomeraceae	Rhizophilic guild	0.622291	0.366533	0.00414451	0.471247	0.00951939	0.408006	0.0050736
460	1098	Response of maize genotypes to several mycorrhizal inoculums in terms of plant growth, nutrient uptake and spore production	2011	>2.9	No_sandy	P_deficent	Alkaline	Zea mays	Poaceae	Fibrous	Annual	56	3	90	>1	Mixed	Glomeraceae	Rhizophilic guild	0.622291	0.159884	0.00712891	0.249655	0.00971886	0.195278	0.00688008
460	1099	Response of maize genotypes to several mycorrhizal inoculums in terms of plant growth, nutrient uptake and spore production	2011	>2.9	No_sandy	P_deficent	Alkaline	Zea mays	Poaceae	Fibrous	Annual	56	3	75	>1	Mixed	Glomeraceae	Rhizophilic guild	0.622291	-0.132205	0.00360851	0.156281	0.00948695	-0.0115164	0.00477746
460	1100	Response of maize genotypes to several mycorrhizal inoculums in terms of plant growth, nutrient uptake and spore production	2011	>2.9	No_sandy	P_deficent	Alkaline	Zea mays	Poaceae	Fibrous	Annual	56	3	60	>1	Mixed	Mixed	Rhizophilic guild	0.622291	0.0453936	0.000428931	0.234029	0.00933087	0.122015	0.00236247
460	1101	Response of maize genotypes to several mycorrhizal inoculums in terms of plant growth, nutrient uptake and spore production	2011	>2.9	No_sandy	P_deficent	Alkaline	Zea mays	Poaceae	Fibrous	Annual	56	3	65	1	Funneliformis mosseae	Glomeraceae	Rhizophilic guild	0.631902	0.150639	0.00336953	0.382551	0.00501344	0.246919	0.002388
460	1102	Response of maize genotypes to several mycorrhizal inoculums in terms of plant growth, nutrient uptake and spore production	2011	>2.9	No_sandy	P_deficent	Alkaline	Zea mays	Poaceae	Fibrous	Annual	56	3	90	1	Claroideoglomus etunicatum	Claroideoglomeraceae	Rhizophilic guild	0.631902	0.0681745	0.00690473	0.299745	0.0049422	0.164303	0.00363799
460	1103	Response of maize genotypes to several mycorrhizal inoculums in terms of plant growth, nutrient uptake and spore production	2011	>2.9	No_sandy	P_deficent	Alkaline	Zea mays	Poaceae	Fibrous	Annual	56	3	60	1	Funneliformis caledonium	Glomeraceae	Rhizophilic guild	0.631902	0.0880333	0.00050501	0.321098	0.00492868	0.184825	0.00111007
460	1104	Response of maize genotypes to several mycorrhizal inoculums in terms of plant growth, nutrient uptake and spore production	2011	>2.9	No_sandy	P_deficent	Alkaline	Zea mays	Poaceae	Fibrous	Annual	56	3	66.7	1	Rhizophagus clarus	Glomeraceae	Rhizophilic guild	0.631902	0.380619	0.00601684	0.372567	0.0050214	0.377509	0.00376801
460	1105	Response of maize genotypes to several mycorrhizal inoculums in terms of plant growth, nutrient uptake and spore production	2011	>2.9	No_sandy	P_deficent	Alkaline	Zea mays	Poaceae	Fibrous	Annual	56	3	53.3	1	Rhizophagus fasciculatus	Glomeraceae	Rhizophilic guild	0.631902	0.142692	0.000572964	0.483265	0.00494143	0.288621	0.00114382
460	1106	Response of maize genotypes to several mycorrhizal inoculums in terms of plant growth, nutrient uptake and spore production	2011	>2.9	No_sandy	P_deficent	Alkaline	Zea mays	Poaceae	Fibrous	Annual	56	3	90	1	Glomus macrocarpum	Glomeraceae	Rhizophilic guild	0.631902	0.0852204	0.00622101	0.317571	0.00493087	0.181695	0.00337286
460	1107	Response of maize genotypes to several mycorrhizal inoculums in terms of plant growth, nutrient uptake and spore production	2011	>2.9	No_sandy	P_deficent	Alkaline	Zea mays	Poaceae	Fibrous	Annual	56	3	66.7	1	Rhizophagus intraradices	Glomeraceae	Rhizophilic guild	0.631902	0.22926	0.001166	0.58292	0.00726999	0.381368	0.00249202
460	1108	Response of maize genotypes to several mycorrhizal inoculums in terms of plant growth, nutrient uptake and spore production	2011	>2.9	No_sandy	P_deficent	Alkaline	Zea mays	Poaceae	Fibrous	Annual	56	3	50	>1	Mixed	Glomeraceae	Rhizophilic guild	0.631902	-0.0898039	0.00325438	0.338551	0.00491805	0.0983813	0.00210213
460	1109	Response of maize genotypes to several mycorrhizal inoculums in terms of plant growth, nutrient uptake and spore production	2011	>2.9	No_sandy	P_deficent	Alkaline	Zea mays	Poaceae	Fibrous	Annual	56	3	55	>1	Mixed	Glomeraceae	Rhizophilic guild	0.631902	-0.0406942	0.00690016	-0.00486619	0.00499945	-0.0266682	0.00405163
460	1110	Response of maize genotypes to several mycorrhizal inoculums in terms of plant growth, nutrient uptake and spore production	2011	>2.9	No_sandy	P_deficent	Alkaline	Zea mays	Poaceae	Fibrous	Annual	56	3	96.7	>1	Mixed	Mixed	Rhizophilic guild	0.631902	0.0449851	0.00310457	0.135956	0.00490599	0.0811988	0.0022864
460	1111	Response of maize genotypes to several mycorrhizal inoculums in terms of plant growth, nutrient uptake and spore production	2011	>2.9	No_sandy	P_deficent	Alkaline	Zea mays	Poaceae	Fibrous	Annual	56	3	60	1	Funneliformis mosseae	Glomeraceae	Rhizophilic guild	0.699659	0.563994	0.0295858	0.587787	0.00502376	0.573857	0.0142259
460	1112	Response of maize genotypes to several mycorrhizal inoculums in terms of plant growth, nutrient uptake and spore production	2011	>2.9	No_sandy	P_deficent	Alkaline	Zea mays	Poaceae	Fibrous	Annual	56	3	85	1	Claroideoglomus etunicatum	Claroideoglomeraceae	Rhizophilic guild	0.699659	0.267862	0.00304333	0.508872	0.00497348	0.374191	0.0037835
460	1113	Response of maize genotypes to several mycorrhizal inoculums in terms of plant growth, nutrient uptake and spore production	2011	>2.9	No_sandy	P_deficent	Alkaline	Zea mays	Poaceae	Fibrous	Annual	56	3	85	1	Funneliformis caledonium	Glomeraceae	Rhizophilic guild	0.699659	0.306279	0.00502738	0.517632	0.00496811	0.398749	0.00467517
460	1114	Response of maize genotypes to several mycorrhizal inoculums in terms of plant growth, nutrient uptake and spore production	2011	>2.9	No_sandy	P_deficent	Alkaline	Zea mays	Poaceae	Fibrous	Annual	56	3	95	1	Rhizophagus clarus	Glomeraceae	Rhizophilic guild	0.699659	0.163372	0.00319202	0.21038	0.00505446	0.182991	0.00390861
460	1115	Response of maize genotypes to several mycorrhizal inoculums in terms of plant growth, nutrient uptake and spore production	2011	>2.9	No_sandy	P_deficent	Alkaline	Zea mays	Poaceae	Fibrous	Annual	56	3	35	1	Rhizophagus fasciculatus	Glomeraceae	Rhizophilic guild	0.699659	0.321242	0.00303712	0.549108	0.0050527	0.421402	0.00380256
460	1116	Response of maize genotypes to several mycorrhizal inoculums in terms of plant growth, nutrient uptake and spore production	2011	>2.9	No_sandy	P_deficent	Alkaline	Zea mays	Poaceae	Fibrous	Annual	56	3	75	1	Glomus macrocarpum	Glomeraceae	Rhizophilic guild	0.699659	0.402046	0.00486372	0.370722	0.00494731	0.38927	0.0046952
460	1117	Response of maize genotypes to several mycorrhizal inoculums in terms of plant growth, nutrient uptake and spore production	2011	>2.9	No_sandy	P_deficent	Alkaline	Zea mays	Poaceae	Fibrous	Annual	56	3	65	1	Rhizophagus intraradices	Glomeraceae	Rhizophilic guild	0.699659	0.280833	0.00747236	0.275412	0.00500683	0.278605	0.00584856
460	1118	Response of maize genotypes to several mycorrhizal inoculums in terms of plant growth, nutrient uptake and spore production	2011	>2.9	No_sandy	P_deficent	Alkaline	Zea mays	Poaceae	Fibrous	Annual	56	3	85	>1	Mixed	Glomeraceae	Rhizophilic guild	0.699659	0.145827	0.0052096	0.275412	0.00500683	0.201218	0.00481803
460	1119	Response of maize genotypes to several mycorrhizal inoculums in terms of plant growth, nutrient uptake and spore production	2011	>2.9	No_sandy	P_deficent	Alkaline	Zea mays	Poaceae	Fibrous	Annual	56	3	90	>1	Mixed	Glomeraceae	Rhizophilic guild	0.699659	0.197563	0.00552417	0.380772	0.00506389	0.277084	0.00496339
460	1120	Response of maize genotypes to several mycorrhizal inoculums in terms of plant growth, nutrient uptake and spore production	2011	>2.9	No_sandy	P_deficent	Alkaline	Zea mays	Poaceae	Fibrous	Annual	56	3	90	>1	Mixed	Mixed	Rhizophilic guild	0.699659	0.136939	0.00405376	0.10194	0.0049744	0.12268	0.00433882
460	1121	Response of maize genotypes to several mycorrhizal inoculums in terms of plant growth, nutrient uptake and spore production	2011	>2.9	No_sandy	P_deficent	Alkaline	Zea mays	Poaceae	Fibrous	Annual	56	3	46.7	1	Funneliformis mosseae	Glomeraceae	Rhizophilic guild	0.829412	0.693147	0.169723	0.693147	0.00956944	0.693147	0.0726549
460	1122	Response of maize genotypes to several mycorrhizal inoculums in terms of plant growth, nutrient uptake and spore production	2011	>2.9	No_sandy	P_deficent	Alkaline	Zea mays	Poaceae	Fibrous	Annual	56	3	70	1	Claroideoglomus etunicatum	Claroideoglomeraceae	Rhizophilic guild	0.829412	0.551177	0.121072	0.727994	0.00972124	0.635232	0.0535164
460	1123	Response of maize genotypes to several mycorrhizal inoculums in terms of plant growth, nutrient uptake and spore production	2011	>2.9	No_sandy	P_deficent	Alkaline	Zea mays	Poaceae	Fibrous	Annual	56	3	80	1	Funneliformis caledonium	Glomeraceae	Rhizophilic guild	0.829412	0.777705	0.123776	0.657042	0.00990936	0.724795	0.0568355
460	1124	Response of maize genotypes to several mycorrhizal inoculums in terms of plant growth, nutrient uptake and spore production	2011	>2.9	No_sandy	P_deficent	Alkaline	Zea mays	Poaceae	Fibrous	Annual	56	3	81.7	1	Rhizophagus clarus	Glomeraceae	Rhizophilic guild	0.829412	0.440151	0.10046	0.440312	0.00972124	0.440224	0.0460329
460	1125	Response of maize genotypes to several mycorrhizal inoculums in terms of plant growth, nutrient uptake and spore production	2011	>2.9	No_sandy	P_deficent	Alkaline	Zea mays	Poaceae	Fibrous	Annual	56	3	86.7	1	Rhizophagus fasciculatus	Glomeraceae	Rhizophilic guild	0.829412	0.657215	0.102046	0.657042	0.00990936	0.657137	0.0468743
460	1126	Response of maize genotypes to several mycorrhizal inoculums in terms of plant growth, nutrient uptake and spore production	2011	>2.9	No_sandy	P_deficent	Alkaline	Zea mays	Poaceae	Fibrous	Annual	56	3	70	1	Glomus macrocarpum	Glomeraceae	Rhizophilic guild	0.829412	1.13519	0.144945	0.638489	0.00957481	0.939806	0.0702952
460	1127	Response of maize genotypes to several mycorrhizal inoculums in terms of plant growth, nutrient uptake and spore production	2011	>2.9	No_sandy	P_deficent	Alkaline	Zea mays	Poaceae	Fibrous	Annual	56	3	66.7	1	Rhizophagus intraradices	Glomeraceae	Rhizophilic guild	0.829412	0.865616	0.0958879	0.787812	0.0096189	0.83109	0.0437756
460	1128	Response of maize genotypes to several mycorrhizal inoculums in terms of plant growth, nutrient uptake and spore production	2011	>2.9	No_sandy	P_deficent	Alkaline	Zea mays	Poaceae	Fibrous	Annual	56	3	96.7	>1	Mixed	Glomeraceae	Rhizophilic guild	0.829412	0.458913	0.0935378	0.266176	0.0100217	0.376099	0.0425697
460	1129	Response of maize genotypes to several mycorrhizal inoculums in terms of plant growth, nutrient uptake and spore production	2011	>2.9	No_sandy	P_deficent	Alkaline	Zea mays	Poaceae	Fibrous	Annual	56	3	50	>1	Mixed	Glomeraceae	Rhizophilic guild	0.829412	0.704843	0.0971069	0.608068	0.00985991	0.662124	0.0445467
460	1130	Response of maize genotypes to several mycorrhizal inoculums in terms of plant growth, nutrient uptake and spore production	2011	>2.9	No_sandy	P_deficent	Alkaline	Zea mays	Poaceae	Fibrous	Annual	56	3	73.3	>1	Mixed	Mixed	Rhizophilic guild	0.829412	0.498991	0.0903189	0.564669	0.00972881	0.529303	0.0402076
460	1131	Response of maize genotypes to several mycorrhizal inoculums in terms of plant growth, nutrient uptake and spore production	2011	>2.9	No_sandy	P_deficent	Alkaline	Zea mays	Poaceae	Fibrous	Annual	56	3	83.3	1	Funneliformis mosseae	Glomeraceae	Rhizophilic guild	0.831111	0.382992	0.0785635	0.445645	0.00952416	0.411917	0.0382948
460	1132	Response of maize genotypes to several mycorrhizal inoculums in terms of plant growth, nutrient uptake and spore production	2011	>2.9	No_sandy	P_deficent	Alkaline	Zea mays	Poaceae	Fibrous	Annual	56	3	85	1	Claroideoglomus etunicatum	Claroideoglomeraceae	Rhizophilic guild	0.831111	0.505478	0.0350241	0.414338	0.00934034	0.465137	0.0191594
460	1133	Response of maize genotypes to several mycorrhizal inoculums in terms of plant growth, nutrient uptake and spore production	2011	>2.9	No_sandy	P_deficent	Alkaline	Zea mays	Poaceae	Fibrous	Annual	56	3	60	1	Funneliformis caledonium	Glomeraceae	Rhizophilic guild	0.831111	-0.0979804	0.0357095	0.0771591	0.0096363	-0.0146702	0.0202476
460	1134	Response of maize genotypes to several mycorrhizal inoculums in terms of plant growth, nutrient uptake and spore production	2011	>2.9	No_sandy	P_deficent	Alkaline	Zea mays	Poaceae	Fibrous	Annual	56	3	70	1	Rhizophagus clarus	Glomeraceae	Rhizophilic guild	0.831111	-0.0501244	0.0419193	0.184992	0.0092773	0.0634761	0.0234716
460	1135	Response of maize genotypes to several mycorrhizal inoculums in terms of plant growth, nutrient uptake and spore production	2011	>2.9	No_sandy	P_deficent	Alkaline	Zea mays	Poaceae	Fibrous	Annual	56	3	90	1	Rhizophagus fasciculatus	Glomeraceae	Rhizophilic guild	0.831111	0.616986	0.045978	0.515095	0.00933428	0.572021	0.0257493
460	1136	Response of maize genotypes to several mycorrhizal inoculums in terms of plant growth, nutrient uptake and spore production	2011	>2.9	No_sandy	P_deficent	Alkaline	Zea mays	Poaceae	Fibrous	Annual	56	3	80	1	Glomus macrocarpum	Glomeraceae	Rhizophilic guild	0.831111	0.239891	0.0356269	0.445645	0.00952416	0.338551	0.0201677
460	1137	Response of maize genotypes to several mycorrhizal inoculums in terms of plant growth, nutrient uptake and spore production	2011	>2.9	No_sandy	P_deficent	Alkaline	Zea mays	Poaceae	Fibrous	Annual	56	3	83.3	1	Rhizophagus intraradices	Glomeraceae	Rhizophilic guild	0.831111	0.450368	0.035647	0.492476	0.00954258	0.4697	0.0200338
460	1138	Response of maize genotypes to several mycorrhizal inoculums in terms of plant growth, nutrient uptake and spore production	2011	>2.9	No_sandy	P_deficent	Alkaline	Zea mays	Poaceae	Fibrous	Annual	56	3	85	>1	Mixed	Glomeraceae	Rhizophilic guild	0.831111	0.367725	0.0398527	0.232723	0.00942923	0.308698	0.0226538
460	1139	Response of maize genotypes to several mycorrhizal inoculums in terms of plant growth, nutrient uptake and spore production	2011	>2.9	No_sandy	P_deficent	Alkaline	Zea mays	Poaceae	Fibrous	Annual	56	3	80	>1	Mixed	Glomeraceae	Rhizophilic guild	0.831111	0.287682	0.0402222	0.286344	0.00949407	0.287075	0.0228674
460	1140	Response of maize genotypes to several mycorrhizal inoculums in terms of plant growth, nutrient uptake and spore production	2011	>2.9	No_sandy	P_deficent	Alkaline	Zea mays	Poaceae	Fibrous	Annual	56	3	76.7	>1	Mixed	Mixed	Rhizophilic guild	0.831111	0.355341	0.0360187	0.431852	0.00965538	0.390795	0.0204121
461	1141	Response of mycorrhizal hybrid tomato cultivars under saline stress	2013	>2.9	Sandy	No_P_deficient	Neutral	Solanum lycopersicum	Solanaceae	Fibrous	Annual	90	2		1	Claroideoglomus etunicatum	Claroideoglomeraceae	Rhizophilic guild	0.14769	0.109205	0.00981431	0.0908486	0.000319873	0.106861	0.00763333
461	1142	Response of mycorrhizal hybrid tomato cultivars under saline stress	2013	>2.9	Sandy	No_P_deficient	Neutral	Solanum lycopersicum	Solanaceae	Fibrous	Annual	90	2	32.5	1	Funneliformis mosseae	Glomeraceae	Rhizophilic guild	0.14769	0.0811462	0.0035278	0.132309	0.000475624	0.0878787	0.00294279
461	1143	Response of mycorrhizal hybrid tomato cultivars under saline stress	2013	>2.9	Sandy	No_P_deficient	Neutral	Solanum lycopersicum	Solanaceae	Fibrous	Annual	90	2		>1	Mixed	Mixed	Rhizophilic guild	0.14769	0.0410452	0.00144791	0.0722747	0.00157355	0.0451191	0.00138716
462	1144	Response of Mycorrhizal Switchgrass to Phosphorus Fractions in Acidic Soil	2005	1_2.9	Sandy		Acidic	Panicum virgatum	Poaceae	Fibrous	Annual	102	4	11.5	1	Rhizophagus clarus	Glomeraceae	Rhizophilic guild	0.444444	1.06087	0.005	1.60944	0.005	1.26369	0.005
462	1145	Response of Mycorrhizal Switchgrass to Phosphorus Fractions in Acidic Soil	2005	1_2.9	Sandy		Acidic	Panicum virgatum	Poaceae	Fibrous	Annual	102	4	7	1	Claroideoglomus etunicatum	Claroideoglomeraceae	Rhizophilic guild	0.444444	0.93827	0.005	1.38629	0.005	1.09861	0.005
462	1146	Response of Mycorrhizal Switchgrass to Phosphorus Fractions in Acidic Soil	2005	1_2.9	Sandy		Acidic	Panicum virgatum	Poaceae	Fibrous	Annual	102	4	7.8	1	Acaulospora mellea	Acaulosporaceae	Ancestral guild	0.444444	1.6946	0.005	2.3979	0.005	1.96765	0.005
462	1147	Response of Mycorrhizal Switchgrass to Phosphorus Fractions in Acidic Soil	2005	1_2.9	Sandy		Acidic	Panicum virgatum	Poaceae	Fibrous	Annual	102	4	11	1	Rhizophagus clarus	Glomeraceae	Rhizophilic guild	0.493506	1.80893	0.005	2.17056	0.005	1.94342	0.005
462	1148	Response of Mycorrhizal Switchgrass to Phosphorus Fractions in Acidic Soil	2005	1_2.9	Sandy		Acidic	Panicum virgatum	Poaceae	Fibrous	Annual	102	4	42.3	1	Claroideoglomus etunicatum	Claroideoglomeraceae	Rhizophilic guild	0.493506	0.803689	0.005	0.862224	0.005	0.823412	0.005
462	1149	Response of Mycorrhizal Switchgrass to Phosphorus Fractions in Acidic Soil	2005	1_2.9	Sandy		Acidic	Panicum virgatum	Poaceae	Fibrous	Annual	102	4	32.5	1	Acaulospora mellea	Acaulosporaceae	Ancestral guild	0.493506	1.17766	0.005	1.85958	0.005	1.4576	0.005
462	1150	Response of Mycorrhizal Switchgrass to Phosphorus Fractions in Acidic Soil	2005	1_2.9	Sandy		Acidic	Panicum virgatum	Poaceae	Fibrous	Annual	102	4	15.8	1	Claroideoglomus etunicatum	Claroideoglomeraceae	Rhizophilic guild	0.6	2.54945	0.005	3.01226	0.005	2.74887	0.005
462	1151	Response of Mycorrhizal Switchgrass to Phosphorus Fractions in Acidic Soil	2005	1_2.9	Sandy		Acidic	Panicum virgatum	Poaceae	Fibrous	Annual	102	4	5	1	Acaulospora mellea	Acaulosporaceae	Ancestral guild	0.6	1.1314	0.005	1.38629	0.005	1.23474	0.005
462	1152	Response of Mycorrhizal Switchgrass to Phosphorus Fractions in Acidic Soil	2005	1_2.9	Sandy		Acidic	Panicum virgatum	Poaceae	Fibrous	Annual	102	4	8.5	1	Rhizophagus clarus	Glomeraceae	Rhizophilic guild	0.846154	0.990399	0.005	1.23969	0.005	1.11241	0.005
462	1153	Response of Mycorrhizal Switchgrass to Phosphorus Fractions in Acidic Soil	2005	1_2.9	Sandy		Acidic	Panicum virgatum	Poaceae	Fibrous	Annual	102	4	13.3	1	Claroideoglomus etunicatum	Claroideoglomeraceae	Rhizophilic guild	0.846154	1.07264	0.005	1.3633	0.005	1.2164	0.005
462	1154	Response of Mycorrhizal Switchgrass to Phosphorus Fractions in Acidic Soil	2005	1_2.9	Sandy		Acidic	Panicum virgatum	Poaceae	Fibrous	Annual	102	4	8.5	1	Acaulospora mellea	Acaulosporaceae	Ancestral guild	0.846154	1.98893	0.005	2.3206	0.005	2.15466	0.005
462	1155	Response of Mycorrhizal Switchgrass to Phosphorus Fractions in Acidic Soil	2005	1_2.9	Sandy		Acidic	Panicum virgatum	Poaceae	Fibrous	Annual	102	4	5.8	1	Rhizophagus intraradices	Glomeraceae	Rhizophilic guild	0.909091	0.0870114	0.005	-0.223144	0.005	-0.0487902	0.005
462	1156	Response of Mycorrhizal Switchgrass to Phosphorus Fractions in Acidic Soil	2005	1_2.9	Sandy		Acidic	Panicum virgatum	Poaceae	Fibrous	Annual	102	4	9	1	Rhizophagus clarus	Glomeraceae	Rhizophilic guild	0.909091	2.62599	0.005	3.06339	0.005	2.85811	0.005
462	1157	Response of Mycorrhizal Switchgrass to Phosphorus Fractions in Acidic Soil	2005	1_2.9	Sandy		Acidic	Panicum virgatum	Poaceae	Fibrous	Annual	102	4	26.3	1	Claroideoglomus etunicatum	Claroideoglomeraceae	Rhizophilic guild	0.909091	2.04476	0.005	2.57261	0.005	2.33076	0.005
462	1158	Response of Mycorrhizal Switchgrass to Phosphorus Fractions in Acidic Soil	2005	1_2.9	Sandy		Acidic	Panicum virgatum	Poaceae	Fibrous	Annual	102	4	16.8	1	Acaulospora mellea	Acaulosporaceae	Ancestral guild	0.909091	2.23683	0.005	2.62467	0.005	2.44027	0.005
463	1159	Response of Passiflora setacea to Mycorrhization and Phosphate Fertilization in a Semiarid Region of Brazil	2014	1_2.9	Sandy	No_P_deficient	Acidic	Passiflora setacea	Other	Taproot	Perennial	90	4	24.14	1	Claroideoglomus etunicatum	Claroideoglomeraceae	Rhizophilic guild	0.117647	1.67765	0.005	2.77259	0.005	1.86775	0.005
464	1160	Response of plant growth to Collembola, arbuscular mycorrhizal and plant pathogenic fungi interactions	2009	<1	Sandy	No_P_deficient	Alkaline	Triticum durum	Poaceae	Fibrous	Annual	35	8	37.4	1	Rhizophagus intraradices	Glomeraceae	Rhizophilic guild	0.168856	0.0965034	0.0025	0.390539	0.0025	0.144705	0.0025
465	1161	Response of Sauropus androgynus to soil phosphorus concentration and mycorrhizal colonization	1994	>2.9	No_sandy		Acidic	Sauropus androgynus	Other	Taproot	Perennial	50	3	55	1	Glomus aggregatum	Glomeraceae	Rhizophilic guild	0.552077	1.73849	0.00666667	1.34421	0.00666667	1.61531	0.00666667
466	1162	Response of snapdragon (Antirrhinum majus L.) to blended water irrigation and arbuscular mycorrhizal fungi inoculation: uptake of minerals and leaf water relations	2016	1_2.9	Sandy	P_deficent	Alkaline	Antirrhinum majus	Other	Taproot	Perennial	70	3		>1	Mixed	Mixed	Mixed	0.396135	0.294902	0.0156485	0.10414	0.0300711	0.24437	0.00526226
467	1163	Response of Soil Phosphorus Required for Maximum Growth of Asparagus o?cinalis L. to Inoculation of Arbuscular Mycorrhizal Fungi	2014	1_2.9	No_sandy	No_P_deficient	Acidic	Asparagus officinalis	Other	Fibrous	Perennial	84	4	81	1	Funneliformis mosseae	Glomeraceae	Rhizophilic guild	2.25266	1.8968	0.0794843	1.55222	0.0502537	1.67132	0.0548446
468	1164	Response of spring wheat ( Triticum aestivum ) to interactions between Pseudomonas species and Glomus clarum NT4	1997	1_2.9	Sandy	No_P_deficient	Neutral	Triticum aestivum	Poaceae	Fibrous	Annual	78	5	34.4	1	Rhizophagus clarus	Glomeraceae	Rhizophilic guild	0.290323	-0.0928937	0.004	-0.117783	0.004	-0.0984401	0.004
468	1165	Response of spring wheat ( Triticum aestivum ) to interactions between Pseudomonas species and Glomus clarum NT4	1997	1_2.9	Sandy	No_P_deficient	Neutral	Triticum aestivum	Poaceae	Fibrous	Annual	40	5		1	Rhizophagus clarus	Glomeraceae	Rhizophilic guild	0.373239	0.0346055	0.004	0.523947	0.004	0.192949	0.004
469	1166	Response of two tomato cultivars differing in salt tolerance to inoculation with mycorrhizal fungi under salt stress	2001	>2.9	No_sandy	No_P_deficient	Alkaline	Lycopersicon esculentum	Solanaceae	Taproot	Annual	56	2	49.45	1	Funneliformis mosseae	Glomeraceae	Rhizophilic guild	0.0975336	0.192176	0.0027255	0.687383	0.00122247	0.247562	0.00239989
470	1167	Response of wheat to dual inoculation with VA‐mycorrhiza and azospirillum, fertilized with NPK and irrigated with sewage effluent	1991	1_2.9	Sandy	No_P_deficient	Alkaline	Triticum aestivum	Poaceae	Fibrous	Annual	90	3	16.5	1	Glomus sp.	Glomeraceae	Rhizophilic guild	0.275	-0.192372	0.00666667	0.0870114	0.00666667	-0.125163	0.00666667
471	1168	Responses of directly seeded wetland rice to arbuscular mycorrhizal fungi inoculation	2008	<1	No_sandy	No_P_deficient	Acidic	Oryza sativa	Poaceae	Fibrous	Annual	122	3	36.2	1	Glomus sp.	Glomeraceae	Rhizophilic guild	0.335227	0.137784	0.00666667	0.444251	0.00666667	0.223994	0.00666667
472	1169	Responses of Parkia biglobosa (Jacq.) Benth, Tamarindus indica L. and Zizyphus mauritiana Lam. to arbuscular mycorrhizal fungi in a phosphorus-deficient sandy soil	1998	1_2.9	Sandy	P_deficent	Neutral	Parkia biglobosa	Fabaceae	Taproot	Perennial	60	12	91	1	Acaulospora spinosa	Acaulosporaceae	Ancestral guild	0.647059	0.302281	0.00166667	0.241162	0.00166667	0.278713	0.00166667
472	1170	Responses of Parkia biglobosa (Jacq.) Benth, Tamarindus indica L. and Zizyphus mauritiana Lam. to arbuscular mycorrhizal fungi in a phosphorus-deficient sandy soil	1998	1_2.9	Sandy	P_deficent	Neutral	Parkia biglobosa	Fabaceae	Taproot	Perennial	60	12	93	1	Glomus aggregatum	Glomeraceae	Rhizophilic guild	0.647059	0.506109	0.00166667	0.374693	0.00166667	0.45652	0.00166667
472	1171	Responses of Parkia biglobosa (Jacq.) Benth, Tamarindus indica L. and Zizyphus mauritiana Lam. to arbuscular mycorrhizal fungi in a phosphorus-deficient sandy soil	1998	1_2.9	Sandy	P_deficent	Neutral	Parkia biglobosa	Fabaceae	Taproot	Perennial	60	12	90	1	Rhizophagus manihotis	Glomeraceae	Rhizophilic guild	0.647059	0.440151	0.00166667	0.269333	0.00166667	0.376478	0.00166667
472	1172	Responses of Parkia biglobosa (Jacq.) Benth, Tamarindus indica L. and Zizyphus mauritiana Lam. to arbuscular mycorrhizal fungi in a phosphorus-deficient sandy soil	1998	1_2.9	Sandy	P_deficent	Neutral	Parkia biglobosa	Fabaceae	Taproot	Perennial	60	12	90	1	Rhizophagus intraradices	Glomeraceae	Rhizophilic guild	0.647059	0.0682082	0.00166667	0.226773	0.00166667	0.133531	0.00166667
472	1173	Responses of Parkia biglobosa (Jacq.) Benth, Tamarindus indica L. and Zizyphus mauritiana Lam. to arbuscular mycorrhizal fungi in a phosphorus-deficient sandy soil	1998	1_2.9	Sandy	P_deficent	Neutral	Parkia biglobosa	Fabaceae	Taproot	Perennial	60	12	17	1	Funneliformis mosseae	Glomeraceae	Rhizophilic guild	0.647059	0.011696	0.00166667	0.103541	0.00166667	0.0487902	0.00166667
472	1174	Responses of Parkia biglobosa (Jacq.) Benth, Tamarindus indica L. and Zizyphus mauritiana Lam. to arbuscular mycorrhizal fungi in a phosphorus-deficient sandy soil	1998	1_2.9	Sandy	P_deficent	Neutral	Tamarindus indica	Fabaceae	Taproot	Perennial	60	12	91	1	Acaulospora spinosa	Acaulosporaceae	Ancestral guild	0.757576	1.40877	0.00166667	1.72277	0.00166667	1.55633	0.00166667
472	1175	Responses of Parkia biglobosa (Jacq.) Benth, Tamarindus indica L. and Zizyphus mauritiana Lam. to arbuscular mycorrhizal fungi in a phosphorus-deficient sandy soil	1998	1_2.9	Sandy	P_deficent	Neutral	Tamarindus indica	Fabaceae	Taproot	Perennial	60	12	95	1	Glomus aggregatum	Glomeraceae	Rhizophilic guild	0.757576	0.897942	0.00166667	1.51732	0.00166667	1.21256	0.00166667
472	1176	Responses of Parkia biglobosa (Jacq.) Benth, Tamarindus indica L. and Zizyphus mauritiana Lam. to arbuscular mycorrhizal fungi in a phosphorus-deficient sandy soil	1998	1_2.9	Sandy	P_deficent	Neutral	Tamarindus indica	Fabaceae	Taproot	Perennial	60	12	88	1	Rhizophagus manihotis	Glomeraceae	Rhizophilic guild	0.757576	0.95784	0.00166667	1.72277	0.00166667	1.36009	0.00166667
472	1177	Responses of Parkia biglobosa (Jacq.) Benth, Tamarindus indica L. and Zizyphus mauritiana Lam. to arbuscular mycorrhizal fungi in a phosphorus-deficient sandy soil	1998	1_2.9	Sandy	P_deficent	Neutral	Tamarindus indica	Fabaceae	Taproot	Perennial	60	12	86	1	Rhizophagus intraradices	Glomeraceae	Rhizophilic guild	0.757576	0.834226	0.00166667	0.924259	0.00166667	0.874031	0.00166667
472	1178	Responses of Parkia biglobosa (Jacq.) Benth, Tamarindus indica L. and Zizyphus mauritiana Lam. to arbuscular mycorrhizal fungi in a phosphorus-deficient sandy soil	1998	1_2.9	Sandy	P_deficent	Neutral	Tamarindus indica	Fabaceae	Taproot	Perennial	60	12	48	1	Funneliformis mosseae	Glomeraceae	Rhizophilic guild	0.757576	0.751988	0.00166667	0.542324	0.00166667	0.666945	0.00166667
472	1179	Responses of Parkia biglobosa (Jacq.) Benth, Tamarindus indica L. and Zizyphus mauritiana Lam. to arbuscular mycorrhizal fungi in a phosphorus-deficient sandy soil	1998	1_2.9	Sandy	P_deficent	Neutral	Ziziphus mauritiana	Other	Taproot	Perennial	60	12	94	1	Acaulospora spinosa	Acaulosporaceae	Ancestral guild	0.561798	0.282048	0.00166667	0.587787	0.00166667	0.403064	0.00166667
472	1180	Responses of Parkia biglobosa (Jacq.) Benth, Tamarindus indica L. and Zizyphus mauritiana Lam. to arbuscular mycorrhizal fungi in a phosphorus-deficient sandy soil	1998	1_2.9	Sandy	P_deficent	Neutral	Ziziphus mauritiana	Other	Taproot	Perennial	60	12	96	1	Glomus aggregatum	Glomeraceae	Rhizophilic guild	0.561798	0.347646	0.00166667	0.494696	0.00166667	0.403064	0.00166667
472	1181	Responses of Parkia biglobosa (Jacq.) Benth, Tamarindus indica L. and Zizyphus mauritiana Lam. to arbuscular mycorrhizal fungi in a phosphorus-deficient sandy soil	1998	1_2.9	Sandy	P_deficent	Neutral	Ziziphus mauritiana	Other	Taproot	Perennial	60	12	96	1	Rhizophagus manihotis	Glomeraceae	Rhizophilic guild	0.561798	0.155755	0.00166667	0.364643	0.00166667	0.23601	0.00166667
472	1182	Responses of Parkia biglobosa (Jacq.) Benth, Tamarindus indica L. and Zizyphus mauritiana Lam. to arbuscular mycorrhizal fungi in a phosphorus-deficient sandy soil	1998	1_2.9	Sandy	P_deficent	Neutral	Ziziphus mauritiana	Other	Taproot	Perennial	60	12	88	1	Rhizophagus intraradices	Glomeraceae	Rhizophilic guild	0.561798	0.0652405	0.00166667	0.307485	0.00166667	0.159276	0.00166667
472	1183	Responses of Parkia biglobosa (Jacq.) Benth, Tamarindus indica L. and Zizyphus mauritiana Lam. to arbuscular mycorrhizal fungi in a phosphorus-deficient sandy soil	1998	1_2.9	Sandy	P_deficent	Neutral	Ziziphus mauritiana	Other	Taproot	Perennial	60	12	39	1	Funneliformis mosseae	Glomeraceae	Rhizophilic guild	0.561798	0.146093	0.00166667	0.0198026	0.00166667	0.102479	0.00166667
473	1184	Rhizophagus Clarus and Phosphorus in Crotalaria juncea: Growth, Glomalin Content and Acid Phosphatase Activity in a Copper-Contaminated Soil	2018		Sandy	P_deficent	Acidic	Crotalaria juncea	Fabaceae	Taproot	Annual	45	3	80	1	Rhizophagus clarus	Glomeraceae	Rhizophilic guild	0.22114	0.756467	0.00765454	1.13767	0.0175152	0.837158	0.00839148
474	1185	Rhizophagus irregularis modulates cadmium uptake, metal transporter, and chelator gene expression in Medicago sativa	2019		No_sandy	P_deficent	Alkaline	Medicago sativa	Fabaceae	Taproot	Perennial	35	3	56	1	Rhizophagus irregularis	Glomeraceae	Rhizophilic guild	0.623771	0.306103	0.0140916	0.353057	0.0437734	0.324402	0.0236208
475	1186	Rhizophagus irregularis MUCL 41833 Improves Phosphorus Uptake and Water Use Ef?ciency in Maize Plants During Recovery From Drought Stress	2019	>2.9	Sandy			Zea mays	Poaceae	Fibrous	Annual	73	6	77	1	Rhizophagus irregularis	Glomeraceae	Rhizophilic guild	0.324324	0.184571	0.0301532	0.287682	0.0236003	0.210823	0.0283338
476	1187	Rhizosphere bacterial community composition responds to arbuscular mycorrhiza, but notto reductions in microbial activity induced by foliar cutting	2008	1_2.9	Sandy			Trifolium subterraneum	Fabaceae	Fibrous	Perennial	25	4	9.8	1	Rhizophagus intraradices	Glomeraceae	Rhizophilic guild	0.484651	0.205184	0.0444824	0.451175	0.0705086	0.292316	0.0532873
477	1188	Rhizosphere interactions between earthworms (Eisenia fetida) and arbuscular mycorrhizal fungus (Funneliformis mosseae) promote utilization ef?ciency of phytate phosphorus in maize	2015	>2.9	Sandy	P_deficent	Neutral	Zea mays	Poaceae	Fibrous	Annual	42	4	90.51	1	Funneliformis mosseae	Glomeraceae	Rhizophilic guild	0.286344	0.799608	0.004427	1.53604	0.00227344	1.01657	0.00356861
478	1189	RHIZOSPHERIC EFFECT OF VESICULAR ARBUSCULAR MYCORRHIZAL INOCULATION ON BIOMASS PRODUCTION OF RUTA GRAVEOLENS L.: A POTENTIAL MEDICINAL AND AROMATIC HERB	2011	1_2.9	No_sandy			Ruta graveolens	Rutaceae	Fibrous	Annual	120	5	40	1	Funneliformis mosseae	Glomeraceae	Rhizophilic guild	0.290909	0.927141	0.631943	0.988611	1.89789	0.941327	0.856131
478	1190	RHIZOSPHERIC EFFECT OF VESICULAR ARBUSCULAR MYCORRHIZAL INOCULATION ON BIOMASS PRODUCTION OF RUTA GRAVEOLENS L.: A POTENTIAL MEDICINAL AND AROMATIC HERB	2011	1_2.9	No_sandy			Ruta graveolens	Rutaceae	Fibrous	Annual	120	5	37.5	1	Acaulospora laevis	Acaulosporaceae	Ancestral guild	0.290909	0.883016	0.658783	0.940983	2.18905	0.896375	0.91985
478	1191	RHIZOSPHERIC EFFECT OF VESICULAR ARBUSCULAR MYCORRHIZAL INOCULATION ON BIOMASS PRODUCTION OF RUTA GRAVEOLENS L.: A POTENTIAL MEDICINAL AND AROMATIC HERB	2011	1_2.9	No_sandy			Ruta graveolens	Rutaceae	Fibrous	Annual	120	5	26.7	1	Gigaspora gigantea	Gigasporaceae	Edaphophilic guild	0.290909	0.860201	0.70124	0.661398	2.85585	0.818724	1.01253
478	1192	RHIZOSPHERIC EFFECT OF VESICULAR ARBUSCULAR MYCORRHIZAL INOCULATION ON BIOMASS PRODUCTION OF RUTA GRAVEOLENS L.: A POTENTIAL MEDICINAL AND AROMATIC HERB	2011	1_2.9	No_sandy			Ruta graveolens	Rutaceae	Fibrous	Annual	120	5	45.5	>1	Mixed	Mixed	Mixed	0.290909	0.934309	0.697005	1.03407	2.22834	0.957676	0.968242
479	1193	Risk element immobilization/stabilization potential of fungal-transformed dry olive residue and arbuscular mycorrhizal fungi application in contaminated soils	2017	<1	No_sandy	P_deficent	Neutral	Triticum aestivum	Poaceae	Fibrous	Annual	60	4		1	Funneliformis mosseae	Glomeraceae	Rhizophilic guild	0.704876	0.549026	0.0836804	0.030847	0.0705355	0.366069	0.075732
480	1194	Role of AM Fungi in the Uptake and Accumulation of Cd and Ni by Luffa aegyptiaca	2019	>2.9	Sandy	No_P_deficient	Neutral	Luffa aegyptiaca	Other	Fibrous	Annual	90	3	36.1	1	Glomus macrocarpum	Glomeraceae	Rhizophilic guild	0.495468	0.081204	0.00290698	0.0819171	0.0159022	0.0814403	0.00595035
480	1195	Role of AM Fungi in the Uptake and Accumulation of Cd and Ni by Luffa aegyptiaca	2019	>2.9	Sandy	No_P_deficient	Neutral	Luffa aegyptiaca	Other	Fibrous	Annual	90	3	30.2	1	Glomus monosporum	Glomeraceae	Rhizophilic guild	0.495468	0.0839857	0.00385252	0.10414	0.00440787	0.0907082	0.00401791
480	1196	Role of AM Fungi in the Uptake and Accumulation of Cd and Ni by Luffa aegyptiaca	2019	>2.9	Sandy	No_P_deficient	Neutral	Luffa aegyptiaca	Other	Fibrous	Annual	90	3	64.1	>1	Mixed	Glomeraceae	Rhizophilic guild	0.495468	0.114084	0.00384592	0.12588	0.00266544	0.118007	0.00334
481	1197	Role of Arbuscular Mycorrhizae in the Alleviation of Ionic, Osmotic and Oxidative Stresses Induced by Salinity in Cajanus cajan (L.) Millsp. (pigeonpea)	2009	>2.9	Sandy	No_P_deficient	Neutral	Cajanus cajan	Fabaceae	Taproot	Perennial	80	6		1	Funneliformis mosseae	Glomeraceae	Rhizophilic guild	0.323203	0.634293	0.00333333	0.116457	0.00333333	0.530346	0.00333333
482	1198	Role of Arbuscular Mycorrhizal Symbiosis in Proline Biosynthesis and Metabolism of Cicer arietinum L. (Chickpea) Genotypes Under Salt Stress	2013		Sandy	No_P_deficient	Neutral	Cicer arietinum	Fabaceae	Taproot	Annual	80	6	86.82	1	Funneliformis mosseae	Glomeraceae	Rhizophilic guild	2.15	0.293906	0.00242378	0.381855	0.00427089	0.354821	0.00352584
482	1199	Role of Arbuscular Mycorrhizal Symbiosis in Proline Biosynthesis and Metabolism of Cicer arietinum L. (Chickpea) Genotypes Under Salt Stress	2013		Sandy	No_P_deficient	Neutral	Cicer arietinum	Fabaceae	Taproot	Annual	80	6	87.33	1	Funneliformis mosseae	Glomeraceae	Rhizophilic guild	2.21	0.284885	0.0014732	0.349343	0.000891163	0.329753	0.00104304
483	1200	Role of mycorrhization and nutrient availability in competitive interactions between the grassland species Plantago lanceolata and Hieracium pilosella	2015	>2.9	Sandy	P_deficent		Plantago lanceolata	Other	Fibrous	Perennial	90	6	87.3	1	Rhizophagus intraradices	Glomeraceae	Rhizophilic guild	1.31669	1.64475	0.0975422	1.72383	0.121047	1.69046	0.110492
484	1201	Roles of arbuscular mycorrhizal fungi on growth and nutrient acquisition of peach (Prunus persica L. Batsch) seedlings	2011	1_2.9	No_sandy	No_P_deficient	Acidic	Prunus persica	Other	Taproot	Perennial	100	4	54.9	1	Funneliformis mosseae	Glomeraceae	Rhizophilic guild	0.57085	0.295747	0.005	0.497977	0.005	0.374049	0.005
484	1202	Roles of arbuscular mycorrhizal fungi on growth and nutrient acquisition of peach (Prunus persica L. Batsch) seedlings	2011	1_2.9	No_sandy	No_P_deficient	Acidic	Prunus persica	Other	Taproot	Perennial	100	4	43.9	1	Diversispora versiformis	Diversisporaceae	Edaphophilic guild	0.57085	0.177587	0.005	0.271596	0.005	0.212781	0.005
484	1203	Roles of arbuscular mycorrhizal fungi on growth and nutrient acquisition of peach (Prunus persica L. Batsch) seedlings	2011	1_2.9	No_sandy	No_P_deficient	Acidic	Prunus persica	Other	Taproot	Perennial	100	4	23.4	1	Paraglomus occultum	Paraglomeraceae	Rhizophilic guild	0.57085	0.114629	0.005	0.221724	0.005	0.154887	0.005
485	1204	Root Colonization by an Arbuscular Mycorrhizal (AM) Fungus Increases Growth and Secondary Metabolism of Purple Coneflower, Echinacea purpurea (L.) Moench	2009	1_2.9	Sandy			Echinacea purpurea	Asteraceae	Fibrous	Perennial	91	6	100	1	Rhizophagus intraradices	Glomeraceae	Rhizophilic guild	0.4	1.12059	0.15837	1.20397	0.34	1.14513	0.162764
486	1205	Root colonization of mycorrhizal and non- mycorrhizal pepper {Capsicum annuum) by Pseudomonas fluorescens 2-79RL	1996	<1	No_sandy	P_deficent	Neutral	Capsicum annuum	Solanaceae	Fibrous	Annual	77	3	5.8	1	Glomus deserticola	Glomeraceae	Rhizophilic guild	0.401364	-0.35214	0.00619582	-0.464357	0.00256577	-0.383014	0.0046137
486	1206	Root colonization of mycorrhizal and non- mycorrhizal pepper {Capsicum annuum) by Pseudomonas fluorescens 2-79RL	1996	<1	No_sandy	P_deficent	Neutral	Capsicum annuum	Solanaceae	Fibrous	Annual	77	3	48.5	1	Glomus deserticola	Glomeraceae	Rhizophilic guild	0.401364	-0.51843	0.00481371	-0.634857	0.000390343	-0.550414	0.00293971
487	1207	Root exudation and physiological status of a root-colonizing fluorescent pseudomonad in mycorrhizal and non-mycorrhizal pepper (Capsicum annuum L.)	1997	1_2.9	Sandy	P_deficent	Neutral	Capsicum annuum	Solanaceae	Fibrous	Annual	58	3	8	1	Glomus deserticola	Glomeraceae	Rhizophilic guild	0.533803	-0.265397	0.010263	-0.328064	0.00138096	-0.286764	0.00635222
487	1208	Root exudation and physiological status of a root-colonizing fluorescent pseudomonad in mycorrhizal and non-mycorrhizal pepper (Capsicum annuum L.)	1997	1_2.9	Sandy	P_deficent	Neutral	Capsicum annuum	Solanaceae	Fibrous	Annual	58	3	33.5	1	Rhizophagus intraradices	Glomeraceae	Rhizophilic guild	0.533803	-0.269999	0.0122025	-0.367285	0.0146941	-0.302794	0.0128858
488	1209	Screening and selecting arbuscular mycorrhizal fungi for inoculating micropropagated apple rootstocks in acid soils	2007	<1	Sandy	No_P_deficient	Acidic	Malus prunifolia	Other	Taproot	Perennial	70	8	30.3333	1	Claroideoglomus etunicatum	Claroideoglomeraceae	Rhizophilic guild	0.856164	1.05665	0.0025	0.464991	0.0025	0.825986	0.0025
488	1210	Screening and selecting arbuscular mycorrhizal fungi for inoculating micropropagated apple rootstocks in acid soils	2007	<1	Sandy	No_P_deficient	Acidic	Malus prunifolia	Other	Taproot	Perennial	70	8	66.3333	1	Scutellospora pellucida	Gigasporaceae	Edaphophilic guild	0.856164	1.15843	0.0025	0.307485	0.0025	0.851506	0.0025
488	1211	Screening and selecting arbuscular mycorrhizal fungi for inoculating micropropagated apple rootstocks in acid soils	2007	<1	Sandy	No_P_deficient	Acidic	Malus prunifolia	Other	Taproot	Perennial	70	8	27.3333	1	Acaulospora scrobiculata	Acaulosporaceae	Ancestral guild	0.856164	0.236749	0.0025	-0.0491902	0.0025	0.114909	0.0025
488	1212	Screening and selecting arbuscular mycorrhizal fungi for inoculating micropropagated apple rootstocks in acid soils	2007	<1	Sandy	No_P_deficient	Acidic	Malus prunifolia	Other	Taproot	Perennial	70	8	51	1	Gigaspora heterogama	Gigasporaceae	Edaphophilic guild	0.856164	0.549783	0.0025	-0.0491902	0.0025	0.316775	0.0025
489	1213	Screening mycorrhiza species for plant growth, P and Zn uptake in pepper seedling grown under greenhouse conditions	2011		No_sandy	P_deficent	Alkaline	Capsicum annuum	Solanaceae	Fibrous	Annual	97	3	59	1	Funneliformis mosseae	Glomeraceae	Rhizophilic guild	0.8125	0.81093	0.232687	0	0.0295858	0.524524	0.153969
[truncated: 427 more rows]
